# Supplementary material for: H2O2 promotes trimming-induced tillering by regulating energy supply and redox status in bermudagrass
Source: PeerJ. 2024 Feb 29;12:e16985. doi: 10.7717/peerj.16985 (PMC10909351; doi:10.7717/peerj.16985)
Supplement: Supplemental Information 6 [file peerj-12-16985-s006.xlsx]

## Sheet: Tillers number 
	Tillers number					Trillers number
Time（d）	Intact	Trimming				8d(1)	8d(2)	8d(3)	8d(4)
0	3.28571	3.625			Intact+Water	5	4	5	6
2	3.42857	5.25			Intact+H2O2	11	8	9	6
4	4.28571	5.71429			Trimming+Water	11	6	6	8
6	5.42857	9			Trimming+H2O2	12	11	11	11
8	7.5	11
10	9.2	13
	Tiller bud length（cm）
node	Intact	Trimming
1	0.70833	2.276
2	0.56833	1.626
3	0.48833	1.468
4	0.52167	0.628
	Tiller bud length of 2nd bud（cm）
Time（d）	Intact	Trimming
0	0.405	0.446
1	0.425	0.468
2	0.44167	0.566
3	0.455	0.734
4	0.46	1
5	0.464	1.43
6	0.478	1.626

## Sheet: TB1 expression
Time（h）	Actin	TB1							Intact				Trimming
	Cq	Cq	AVERAGE	STDEV					Actin	TB1			Actin	TB1
0（1）	20.9085	30.4815	1.03292	0.31383				node	Cq	Cq	AVERAGE	STDEV	Cq	Cq	AVERAGE	STDEV
0（2）	20.0944	30.5741						1st(1)	21.0148	30.062	0.71298	0.10125	19.7168	27.6971	1.3917	0.18113
0（3）	20.3627	30.3123						1st(2)	20.6199	29.3764			19.5046	27.2402
1（1）	22.287	30.5133	2.51331	0.48565				1st(3)	21.7214	29.1371			19.6978	27.7946
1（2）	22.1405	31.9834						2nd(1)	21.3533	28.6652	1.01151	0.18669	21.9125	36.1043	0.35924	0.11093
1（3）	22.8122	30.6417						2nd(2)	21.2561	28.0324			21.4343	35.859
3（1）	20.8424	30.1735	0.97464	0.04842				2nd(3)	21.2472	28.2872			21.0662	28.0185
3（2）	20.8677	30.3002						3rd(1)	19.5603	26.5166	1.46267	0.35599	21.366	28.498	0.33525	0.09491
3（3）	22.3779	30.303						3rd(2)	19.5854	25.2117			20.704	28.1533
6（1）	21.366	28.498	0.33525	0.09491				3rd(3)	20.3606	25.4854			20.8626	28.842
6（2）	20.704	28.153						4th(1)	20.8322	27.9168	0.72467	0.35688	21.3191	27.708	2.50109	0.20088
6（3）	20.863	28.842						4th(2)	20.6302	29.9127			21.0818	28.044
12（1）	21.5627	34.2366	0.15678	0				4th(3)	21.1791	29.413			20.5738	27.3719
12（2）	20.8593	30.9006
12（3）	21.1067	29.4156
24（1）	21.0743	31.286	0.64189	0.11793
24（2）	20.5914	30.6641
24（3）	22.4935	32.2065

## Sheet: Log1 IPT1 expression
Time（h）	Actin	Log1							Intact				Trimming
	Cq	Cq	AVERAGE	STDEV					Actin	Log1			Actin	Log1
0（1）	20.8009	31.3824	1.07558	0.56014				node	Cq	Cq	AVERAGE	STDEV	Cq	Cq	AVERAGE	STDEV
0（2）	20.8568	30.3234						1st(1)	21.0148	30.5266	0.79145	0.20535	19.7168	27.864	1.66001	0.00592
0（3）	21.074	32.9386						1st(2)	20.6199	29.5963			19.5046	27.6591
1（1）	22.287	30.6241	3.15592	0.09019				1st(3)	21.7214	29.8792			19.6978	27.2035
1（2）	22.1405	31.9853						2nd(1)	21.3533	27.9431	1.05755	0.01683	21.9125	27.1369	1.40141	0.06425
1（3）	22.8122	31.2076						2nd(2)	21.2561	27.8783			21.4343	27.588
3（1）	20.8424	30.7101	2.41671	0.52212				2nd(3)	21.2472	28.0951			21.0662	27.3134
3（2）	20.8677	29.8578						3rd(1)	19.5603	25.6695	0.80016	0.14358	21.366	27.5126	0.47347	0.18641
3（3）	22.3779	30.9238						3rd(2)	19.5854	25.3266			20.704	27.9415
6（1）	22.7106	31.9196	2.5807	0.7343				3rd(3)	20.3606	25.2858			20.8626	27.7058
6（2）	22.6615	34.9193						4th(1)	20.8322	26.3724	1.14719	0.0565	21.3191	28.9299	0.21949	0.06237
6（3）	24.486	33.1064						4th(2)	20.6302	26.7118			21.0818	27.572
12（1）	21.5627	31.1891	2.85307	0.7901				4th(3)	21.1791	26.6188			20.5738	28.7723
12（2）	20.8593	31.6867
12（3）	21.1067	31.3056
24（1）	21.0743	31.5444	0.84373	0.2387
24（2）	20.5914	30.4551
24（3）	22.4935	33.0748
Time（h）	Actin	IPT1							Intact				Trimming
	Cq	Cq	AVERAGE	STDEV					Actin	IPT1			Actin	IPT1
0（1）	19.5983	35.924	1.00751	0.17366				node	Cq	Cq	AVERAGE	STDEV	Cq	Cq	AVERAGE	STDEV
0（2）	20.0461	39.6455						1st(1)	20.6897	33.1374	1.10729	0.62441	20.224	29.5811	6.88278	0.74278
0（3）	19.867	34.791						1st(2)	20.8616	32.2868			19.8432	29.5135
1（1）	20.0471	34.2581	1.43316	0.91381				1st(3)	20.7132	33.6862			19.7422	29.2289
1（2）	18.939	34.3924						2nd(1)	21.334	32.2216	1.00077	0.04803	21.8487	30.7291	3.65576	0.37922
1（3）	21.3753	33.861						2nd(2)	21.3237	32.2901			21.6876	30.7137
3（1）	20.8623	33.7024	2.42461	1.39151				2nd(3)	21.3443	32.1721			21.3874	30.5679
3（2）	19.5233	33.1911						3rd(1)	20.3935	30.976	1.04007	0.37195	21.7861	31.9747	1.26331	0.2937
3（3）	21.2236	31.931						3rd(2)	19.9716	30.6922			21.7449	32.0451
6（1）	20.224	29.5811	6.88278	0.74278				3rd(3)	20.7332	30.5552			22.0949	31.7928
6（2）	19.8432	29.5135						4th(1)	21.32	30.3457	1.00315	0.09544	22.5138	31.6105	0.58803	0.22703
6（3）	19.7422	29.2289						4th(2)	21.3105	30.0881			22.1383	32.1111
12（1）	18.5717	36.9849	273.614	124.182				4th(3)	21.9349	30.7189			22.0609	32.0726
12（2）	17.9225	36.9903
12（3）	17.7547	36.988
24（1）	19.3416	38.8216	6.89132	2.72156
24（2）	19.0441	34.8475
24（3）	20.6781	36.835

## Sheet: SPS expression
Time（h）	Actin	SPS								Intact				Trimming
	Cq	Cq	AVERAGE	STDEV						Actin	SPS			Actin	SPS
0（1）	19.3416	31.167	1.02279	0.303657					node	Cq	Cq	AVERAGE	STDEV	Cq	Cq	AVERAGE	STDEV
0（2）	19.0441	28.6335							1st(1)	20.6897	28.134	1.00017	0.02223	20.224	25.7853	3.12974	0.57925
0（3）	20.6781	31.8887							1st(2)	20.8616	28.3665			19.8432	25.7094
1（1）	19.5983	30.9856	1.34344	0.351638					1st(3)	20.7132	28.1687			19.7422	25.8302
1（2）	20.0461	30.8932							2nd(1)	21.334	27.2422	1.00037	0.03345	21.8487	26.9489	1.53407	0.38681
1（3）	19.867	29.7352							2nd(2)	21.3237	27.1599			21.6876	26.7425
3（1）	20.224	25.7853	3.12974	0.57925					2nd(3)	21.3443	27.271			21.3874	27.1554
3（2）	19.8432	25.7094							3rd(1)	18.7759	26.6326	1.00272	0.09199	19.2507	26.5463	1.32666	0.06457
3（3）	19.7422	25.8302							3rd(2)	19.1187	26.7488			19.9516	27.3429
6（1）	20.224	25.7853	2.46611	0.2449					3rd(3)	18.9473	26.7983			19.5136	26.9446
6（2）	19.8432	25.7094							4th(1)	21.32	27.1642	1.03361	0.30745	22.5138	27.5287	1.08791	0.129
6（3）	19.7422	25.8302							4th(2)	21.3105	26.4853			22.1383	27.4442
12（1）	19.4115	30.4829	4.13349	0.67913					4th(3)	21.9349	26.8806			22.0609	27.3596
12（2）	19.4399	31.0926
12（3）	19.5867	30.3213
24（1）	20.8623	31.1831	2.46611	0.2449
24（2）	19.5233	29.6411
24（3）	21.2236	30.6093

## Sheet: ZT content
node	Intact(content mg/g)	Trimming(content mg/g)
1st(1)	8.95997	15.0721
1st(2)	9.06979	21.2476
1st(3)	9.98111	21.608
2nd(1)	7.00201	6.46769
2nd(2)	8.08205	5.86454
2nd(3)	6.89021	6.66493
3rd(1)	6.25725	7.0627
3rd(2)	5.01142	6.20856
3rd(3)	5.41254	5.74961
4th(1)	6.33055	7.53853
4th(2)	6.61372	8.43111
4th(3)	5.88416	9.01486

## Sheet: Sugar content
	Sucrose				Glucose				Fructose
node	Intact(content mg/g)	Trimming(content mg/g)		node	Intact(content mg/g)	Trimming(content mg/g)		node	Intact(content mg/g)	Trimming(content mg/g)
1st(1)	3.0413	4.62714		1st(1)	0.343903	0.397389		1st(1)	0.184673	0.23884
1st(2)	3.82168	3.90342		1st(2)	0.222529	0.477606		1st(2)	0.144491	0.244377
1st(3)	3.64851	3.61586		1st(3)	0.266609	0.309692		1st(3)	0.157915	0.161242
2nd(1)	4.13293	3.75774		2nd(1)	0.210348	0.231593		2nd(1)	0.125865	0.140967
2nd(2)	4.54904	4.59945		2nd(2)	0.209555	0.42138		2nd(2)	0.141041	0.241075
2nd(3)	3.43899	4.01528		2nd(3)	0.303179	0.308638		2nd(3)	0.194525	0.175446
3rd(1)	4.52701	5.64158		3rd(1)	0.180425	0.456497		3rd(1)	0.137644	0.24443
3rd(2)	3.86494	5.69337		3rd(2)	0.22598	0.474716		3rd(2)	0.186231	0.24346
3rd(3)	4.30929	4.68245		3rd(3)	0.195681	0.489069		3rd(3)	0.187745	0.234734
4th(1)	4.56071	6.65723		4th(1)	0.267174	0.402367		4th(1)	0.239486	0.17761
4th(2)	4.18475	5.63859		4th(2)	0.179036	0.654491		4th(2)	0.191364	0.253486
4th(3)	3.88613	5.1443		4th(3)	0.277655	0.23319		4th(3)	0.244487	0.136615

## Sheet: OJIP fluorescence transient
	Intact				6h Trimming				24h Trimming					Intacta+Water				Intact+H2O2				Ttimming+Water				Trimming+H2O2
time/ms	1	2	3		1	2	3		1	2	3		time/ms	1	2	3		1	2	3		1	2	3		1	2	3
-9.98	0.4949	0.5047	0.4322		0.5332	0.4615	0.4917		0.5421	0.5739	0.5747		-9.98	0.5348	0.5332	0.5804		0.5462	0.5006	0.547		0.5242	0.5299	0.5258		0.5389	0.5389	0.5193
-9.97	0.4974	0.5104	0.4339		0.5413	0.4656	0.486		0.5364	0.5641	0.5812		-9.97	0.5364	0.5299	0.582		0.5438	0.4957	0.5503		0.5234	0.5299	0.521		0.5299	0.5486	0.5096
-9.96	0.4982	0.5104	0.4355		0.5429	0.464	0.4851		0.5356	0.5641	0.582		-9.96	0.5364	0.5291	0.5828		0.5446	0.4957	0.5519		0.5226	0.5307	0.521		0.5299	0.5511	0.5079
-9.95	0.4974	0.5104	0.4371		0.5421	0.4632	0.4851		0.534	0.5633	0.5812		-9.95	0.5356	0.5275	0.5828		0.5446	0.4957	0.5519		0.5226	0.5307	0.521		0.5299	0.5519	0.5079
-9.94	0.4965	0.5112	0.4379		0.5413	0.4664	0.486		0.534	0.5625	0.5804		-9.94	0.5356	0.5267	0.5836		0.5446	0.4949	0.5519		0.5226	0.5315	0.5201		0.5291	0.5519	0.5079
-9.93	0.4957	0.5112	0.4379		0.5405	0.4672	0.4876		0.534	0.5617	0.5796		-9.93	0.5364	0.5267	0.5828		0.5438	0.4957	0.5527		0.5226	0.5324	0.521		0.5291	0.5511	0.5088
-9.92	0.4965	0.5112	0.4371		0.5413	0.4689	0.4876		0.5348	0.5625	0.5796		-9.92	0.5381	0.5275	0.582		0.5438	0.4957	0.5535		0.5226	0.5324	0.5218		0.5291	0.5511	0.5096
-9.91	0.4974	0.5112	0.4363		0.5413	0.4664	0.486		0.5348	0.5633	0.5804		-9.91	0.5381	0.5275	0.5812		0.5438	0.4965	0.5543		0.5226	0.5315	0.5226		0.5299	0.5503	0.5104
-9.9	0.4982	0.512	0.4363		0.5421	0.4656	0.4851		0.5348	0.5641	0.5796		-9.9	0.5372	0.5275	0.582		0.5446	0.4957	0.5543		0.5226	0.5307	0.5218		0.5291	0.5511	0.5104
-9.89	0.4982	0.5128	0.4363		0.5405	0.4648	0.4843		0.534	0.5641	0.5796		-9.89	0.5356	0.5275	0.582		0.5446	0.4957	0.5535		0.5226	0.5299	0.521		0.5283	0.5511	0.5096
-9.88	0.499	0.5128	0.4363		0.5405	0.464	0.4851		0.534	0.5641	0.5804		-9.88	0.5348	0.5275	0.582		0.5454	0.4949	0.5527		0.5234	0.5307	0.5201		0.5283	0.5519	0.5088
-9.87	0.499	0.5128	0.4355		0.5397	0.4632	0.4851		0.5348	0.5633	0.5828		-9.87	0.5356	0.5275	0.582		0.5454	0.4949	0.5527		0.5242	0.5307	0.5201		0.5291	0.5511	0.5079
-9.86	0.499	0.512	0.4347		0.5397	0.4624	0.486		0.5364	0.5633	0.5836		-9.86	0.5364	0.5275	0.5828		0.5454	0.4941	0.5527		0.525	0.5307	0.521		0.5299	0.5511	0.5079
-9.85	0.4982	0.5112	0.4347		0.5405	0.4624	0.486		0.5364	0.5633	0.582		-9.85	0.5372	0.5267	0.5836		0.5446	0.4941	0.5527		0.525	0.5299	0.5218		0.5291	0.5511	0.5079
-9.84	0.4974	0.5104	0.4363		0.5421	0.4624	0.486		0.5356	0.5641	0.582		-9.84	0.5372	0.5275	0.5828		0.5454	0.4933	0.5519		0.525	0.5299	0.5226		0.5283	0.5519	0.5079
-9.83	0.4982	0.5112	0.4363		0.5429	0.4632	0.486		0.5348	0.5641	0.5812		-9.83	0.5381	0.5267	0.582		0.5454	0.4941	0.5519		0.525	0.5299	0.5226		0.5283	0.5519	0.5096
-9.82	0.4974	0.5112	0.4371		0.5429	0.4624	0.486		0.5348	0.5641	0.582		-9.82	0.5381	0.5267	0.582		0.547	0.4949	0.5519		0.525	0.5307	0.5226		0.5291	0.5511	0.5104
-9.81	0.4974	0.5112	0.4363		0.5429	0.4632	0.4868		0.5356	0.5641	0.5804		-9.81	0.5381	0.5258	0.5828		0.5446	0.4949	0.5519		0.525	0.5307	0.5234		0.5299	0.5503	0.5104
-9.8	0.4965	0.5104	0.4379		0.5429	0.4624	0.4876		0.5356	0.5649	0.5788		-9.8	0.5372	0.5267	0.5836		0.5446	0.4949	0.5527		0.5242	0.5307	0.5242		0.5299	0.5495	0.5088
-9.79	0.4974	0.5096	0.4396		0.5429	0.4632	0.4876		0.5356	0.5657	0.5779		-9.79	0.5372	0.5275	0.5836		0.5429	0.4949	0.5527		0.5234	0.5299	0.525		0.5291	0.5503	0.5088
-9.78	0.499	0.5104	0.4387		0.5421	0.4624	0.4868		0.534	0.5674	0.5788		-9.78	0.5372	0.5275	0.5828		0.5454	0.4965	0.5527		0.5226	0.5307	0.5242		0.5299	0.5511	0.5096
-9.77	0.499	0.5104	0.4379		0.5429	0.464	0.486		0.534	0.5665	0.5804		-9.77	0.5372	0.5275	0.582		0.5462	0.4957	0.5519		0.5226	0.5307	0.5234		0.5299	0.5527	0.5096
-9.76	0.499	0.512	0.4363		0.5429	0.4648	0.486		0.5332	0.5665	0.582		-9.76	0.5372	0.5275	0.5812		0.5462	0.4957	0.5519		0.5226	0.5315	0.5226		0.5307	0.5527	0.5088
-9.75	0.4974	0.5128	0.4363		0.5429	0.4656	0.486		0.534	0.5649	0.5804		-9.75	0.5372	0.5275	0.5812		0.5462	0.4949	0.5519		0.5226	0.5315	0.5218		0.5299	0.5527	0.5088
-9.74	0.4974	0.512	0.4371		0.5421	0.4648	0.4851		0.534	0.5657	0.5812		-9.74	0.5372	0.5283	0.582		0.5454	0.4957	0.5519		0.5226	0.5324	0.5218		0.5291	0.5519	0.5088
-9.73	0.499	0.5112	0.4363		0.5421	0.464	0.4843		0.5348	0.5657	0.5812		-9.73	0.5372	0.5283	0.582		0.5462	0.4957	0.5527		0.5234	0.5324	0.5218		0.5291	0.5519	0.5096
-9.72	0.5006	0.5096	0.4363		0.5421	0.464	0.4835		0.5356	0.5657	0.5828		-9.72	0.5372	0.5283	0.5828		0.5454	0.4949	0.5527		0.5234	0.5324	0.5218		0.5275	0.5519	0.5104
-9.71	0.5006	0.5096	0.4347		0.5421	0.4632	0.4843		0.5364	0.5649	0.582		-9.71	0.5372	0.5275	0.5828		0.5462	0.4941	0.5527		0.5242	0.5324	0.5218		0.5275	0.5519	0.512
-9.7	0.499	0.5088	0.4347		0.5421	0.4624	0.4851		0.5372	0.5641	0.5796		-9.7	0.5372	0.5275	0.5828		0.5454	0.4925	0.5519		0.5242	0.5315	0.521		0.5275	0.5519	0.512
-9.69	0.4982	0.5088	0.4363		0.5421	0.4624	0.486		0.5364	0.5641	0.5796		-9.69	0.5372	0.5267	0.5828		0.5454	0.4925	0.5511		0.525	0.5315	0.521		0.5283	0.5519	0.5112
-9.68	0.499	0.5096	0.4363		0.5421	0.4632	0.486		0.5356	0.5649	0.5788		-9.68	0.5372	0.5258	0.5828		0.5454	0.4925	0.5511		0.525	0.5307	0.521		0.5291	0.5519	0.5096
-9.67	0.499	0.5104	0.4363		0.5429	0.464	0.486		0.534	0.5649	0.5804		-9.67	0.5381	0.525	0.582		0.5462	0.4933	0.5511		0.525	0.5315	0.5218		0.5283	0.5519	0.5096
-9.66	0.4974	0.5079	0.4363		0.5438	0.4632	0.486		0.534	0.5649	0.5804		-9.66	0.5372	0.5258	0.582		0.5478	0.4941	0.5519		0.5234	0.5315	0.5234		0.5283	0.5519	0.5088
-9.65	0.4957	0.5079	0.4371		0.5438	0.4624	0.486		0.5332	0.5641	0.5788		-9.65	0.5364	0.5267	0.582		0.5478	0.4949	0.5519		0.5226	0.5324	0.5234		0.5283	0.5519	0.5088
-9.64	0.4949	0.5071	0.4387		0.5438	0.4624	0.486		0.534	0.5657	0.5788		-9.64	0.5356	0.5275	0.5836		0.5478	0.4957	0.5519		0.521	0.5315	0.5234		0.5291	0.5519	0.5079
-9.63	0.4965	0.5096	0.4371		0.5429	0.464	0.486		0.5332	0.5674	0.5788		-9.63	0.5364	0.5267	0.5836		0.5454	0.4957	0.5527		0.521	0.5315	0.5218		0.5299	0.5519	0.5079
-9.62	0.4965	0.5104	0.4355		0.5438	0.4656	0.486		0.534	0.5674	0.5812		-9.62	0.5372	0.5267	0.5836		0.5446	0.4957	0.5527		0.521	0.5315	0.521		0.5307	0.5519	0.5088
-9.61	0.4965	0.5112	0.4339		0.5429	0.4656	0.486		0.534	0.5657	0.5804		-9.61	0.5364	0.5267	0.5836		0.5438	0.4949	0.5527		0.521	0.5324	0.521		0.5307	0.5519	0.5096
-9.6	0.4957	0.5112	0.4339		0.5429	0.4648	0.4868		0.5348	0.5641	0.5788		-9.6	0.5364	0.5275	0.5828		0.5446	0.4941	0.5519		0.5218	0.5324	0.5218		0.5307	0.5519	0.5104
-9.59	0.4965	0.5096	0.4371		0.5421	0.464	0.4868		0.534	0.5641	0.5788		-9.59	0.5356	0.5275	0.582		0.5446	0.4941	0.5519		0.5218	0.5332	0.5218		0.5299	0.5519	0.5104
-9.58	0.499	0.5088	0.4363		0.5429	0.464	0.4868		0.534	0.5649	0.5796		-9.58	0.5364	0.5275	0.582		0.5446	0.4941	0.5519		0.5226	0.534	0.5218		0.5299	0.5519	0.5104
-9.57	0.4998	0.5088	0.4363		0.5438	0.464	0.486		0.5332	0.5649	0.5804		-9.57	0.5356	0.5283	0.5828		0.5454	0.4941	0.5519		0.5226	0.5332	0.521		0.5299	0.5519	0.5112
-9.56	0.5006	0.5096	0.4347		0.5446	0.4632	0.486		0.5332	0.5641	0.5804		-9.56	0.5356	0.5291	0.5836		0.5454	0.4933	0.5519		0.5234	0.5315	0.521		0.5291	0.5527	0.512
-9.55	0.4982	0.5112	0.4355		0.5438	0.4624	0.486		0.5324	0.5625	0.5779		-9.55	0.5356	0.5299	0.5836		0.5454	0.4933	0.5519		0.5242	0.5307	0.521		0.5291	0.5543	0.5112
-9.54	0.4982	0.5112	0.4379		0.5429	0.4615	0.486		0.5324	0.5617	0.5779		-9.54	0.5364	0.5291	0.5836		0.5446	0.4933	0.5519		0.5242	0.5315	0.5218		0.5283	0.556	0.5096
-9.53	0.4974	0.5112	0.4371		0.5421	0.4624	0.486		0.5324	0.5633	0.5779		-9.53	0.5372	0.5283	0.5836		0.5446	0.4933	0.5519		0.5234	0.5315	0.5226		0.5283	0.556	0.5088
-9.52	0.4974	0.5104	0.4371		0.5429	0.4632	0.486		0.5324	0.5633	0.5804		-9.52	0.5372	0.5275	0.5836		0.5454	0.4933	0.5527		0.5226	0.5307	0.5226		0.5275	0.5535	0.5096
-9.51	0.4965	0.5104	0.4347		0.5429	0.4632	0.486		0.5324	0.5641	0.5804		-9.51	0.5381	0.5283	0.5828		0.5462	0.4933	0.5527		0.5234	0.5299	0.5218		0.5275	0.5519	0.5096
-9.5	0.4957	0.5104	0.4339		0.5429	0.4624	0.486		0.5324	0.5641	0.5788		-9.5	0.5381	0.5283	0.582		0.547	0.4941	0.5527		0.5234	0.5307	0.521		0.5283	0.5503	0.5088
-9.49	0.4957	0.5104	0.4363		0.5421	0.4624	0.486		0.5324	0.5657	0.5788		-9.49	0.5381	0.5275	0.5812		0.547	0.4957	0.5519		0.5234	0.5315	0.5201		0.5291	0.5511	0.5079
-9.48	0.4949	0.5104	0.4363		0.5421	0.464	0.486		0.5332	0.5674	0.5796		-9.48	0.5372	0.5267	0.5812		0.5462	0.4974	0.5527		0.5226	0.5324	0.5193		0.5307	0.5511	0.5079
-9.47	0.4949	0.5104	0.4371		0.5429	0.4648	0.4868		0.534	0.5665	0.5812		-9.47	0.5364	0.5267	0.582		0.5454	0.4974	0.5543		0.5226	0.5315	0.5193		0.5324	0.5519	0.5079
-9.46	0.4949	0.5104	0.4347		0.5438	0.4648	0.4868		0.534	0.5657	0.582		-9.46	0.5356	0.5275	0.582		0.5446	0.4965	0.5551		0.5226	0.5307	0.5201		0.5332	0.5519	0.5079
-9.45	0.4957	0.5104	0.4347		0.5454	0.4632	0.4868		0.534	0.5633	0.582		-9.45	0.5348	0.5267	0.582		0.5446	0.4949	0.5551		0.5226	0.5315	0.521		0.5324	0.5519	0.5079
-9.44	0.4974	0.5104	0.4371		0.5454	0.4624	0.486		0.5332	0.5625	0.582		-9.44	0.5348	0.5267	0.5812		0.5446	0.4941	0.5535		0.5226	0.5324	0.521		0.5299	0.5527	0.5088
-9.43	0.4982	0.5104	0.4371		0.5454	0.4615	0.486		0.534	0.5633	0.5804		-9.43	0.5356	0.5267	0.582		0.5454	0.4933	0.5527		0.5226	0.5332	0.5201		0.5291	0.5527	0.5104
-9.42	0.4998	0.5096	0.4371		0.5446	0.4615	0.486		0.534	0.5633	0.5796		-9.42	0.5356	0.5275	0.5828		0.5462	0.4933	0.5519		0.5234	0.5324	0.5201		0.5291	0.5519	0.5112
-9.41	0.499	0.5096	0.4347		0.5438	0.4615	0.486		0.5348	0.5633	0.5796		-9.41	0.5364	0.5275	0.5836		0.5462	0.4933	0.5519		0.5234	0.5324	0.521		0.5299	0.5511	0.512
-9.4	0.4982	0.5096	0.4347		0.5438	0.4624	0.486		0.534	0.5617	0.5804		-9.4	0.5364	0.5283	0.5836		0.5462	0.4933	0.5519		0.5234	0.5324	0.5218		0.5291	0.5519	0.5112
-9.39	0.4965	0.5104	0.4371		0.5429	0.4624	0.486		0.534	0.5617	0.5812		-9.39	0.5372	0.5299	0.5836		0.5454	0.4933	0.5519		0.5226	0.5315	0.5218		0.5299	0.5535	0.512
-9.38	0.4957	0.5104	0.4379		0.5429	0.4624	0.486		0.5332	0.5633	0.5812		-9.38	0.5381	0.5307	0.5836		0.5454	0.4933	0.5519		0.5226	0.5307	0.521		0.5299	0.5543	0.5112
-9.37	0.4957	0.5104	0.4379		0.5421	0.4624	0.486		0.534	0.5641	0.5804		-9.37	0.5381	0.5299	0.5836		0.5446	0.4933	0.5511		0.5234	0.5299	0.5201		0.5307	0.5535	0.5104
-9.36	0.4957	0.5112	0.4363		0.5413	0.4624	0.486		0.5332	0.5649	0.5804		-9.36	0.5381	0.5283	0.5828		0.5454	0.4941	0.5511		0.5234	0.5307	0.5201		0.5299	0.5519	0.5088
-9.35	0.4957	0.512	0.4355		0.5413	0.4632	0.486		0.534	0.5649	0.5804		-9.35	0.5372	0.5275	0.582		0.5462	0.4949	0.5511		0.5234	0.5307	0.5201		0.5299	0.5519	0.5088
-9.34	0.4965	0.512	0.4371		0.5413	0.4632	0.4868		0.534	0.5657	0.5812		-9.34	0.5364	0.5275	0.5812		0.547	0.4949	0.5527		0.5226	0.5307	0.521		0.5299	0.5519	0.5096
-9.33	0.4965	0.5112	0.4363		0.5421	0.464	0.4876		0.5348	0.5665	0.5812		-9.33	0.5364	0.5275	0.5812		0.5478	0.4957	0.5543		0.5226	0.5307	0.5218		0.5307	0.5527	0.5096
-9.32	0.4965	0.5104	0.4363		0.5421	0.4648	0.4884		0.5348	0.5657	0.5812		-9.32	0.5356	0.5275	0.5812		0.5478	0.4957	0.5551		0.5226	0.5307	0.5218		0.5307	0.5519	0.5096
-9.31	0.4957	0.5104	0.4347		0.5421	0.4648	0.4876		0.5348	0.5649	0.5812		-9.31	0.5364	0.5267	0.5812		0.5478	0.4965	0.556		0.5226	0.5315	0.521		0.5299	0.5511	0.5088
-9.3	0.4965	0.512	0.4347		0.5421	0.4656	0.4876		0.5348	0.5641	0.5804		-9.3	0.5364	0.5258	0.5812		0.5462	0.4957	0.5551		0.5234	0.5307	0.5201		0.5283	0.5503	0.5096
-9.29	0.4974	0.5128	0.4363		0.5429	0.4648	0.4868		0.534	0.5641	0.5796		-9.29	0.5372	0.5258	0.5812		0.5454	0.4957	0.5543		0.5234	0.5307	0.5201		0.5291	0.5503	0.5096
-9.28	0.499	0.5128	0.4363		0.5438	0.4648	0.4868		0.5332	0.5649	0.5796		-9.28	0.5364	0.5267	0.5812		0.5454	0.4957	0.5527		0.5234	0.5299	0.5201		0.5299	0.5511	0.5104
-9.27	0.4998	0.512	0.4363		0.5446	0.464	0.486		0.5332	0.5641	0.5804		-9.27	0.5356	0.5275	0.582		0.5462	0.4949	0.5511		0.5234	0.5299	0.521		0.5299	0.5519	0.5104
-9.26	0.4998	0.5112	0.4347		0.5438	0.464	0.486		0.5332	0.5641	0.582		-9.26	0.5356	0.5283	0.5828		0.547	0.4941	0.5511		0.5226	0.5299	0.521		0.5291	0.5511	0.5112
-9.25	0.499	0.512	0.4355		0.5429	0.4632	0.486		0.5332	0.5633	0.5828		-9.25	0.5356	0.5291	0.5828		0.5462	0.4933	0.5511		0.5226	0.5299	0.521		0.5283	0.5511	0.5104
-9.24	0.4982	0.5112	0.4355		0.5421	0.4624	0.486		0.5324	0.5641	0.5828		-9.24	0.5364	0.5299	0.582		0.5454	0.4941	0.5527		0.5226	0.5299	0.521		0.5275	0.5519	0.5096
-9.23	0.4982	0.5112	0.4355		0.5421	0.4615	0.4851		0.5332	0.5649	0.582		-9.23	0.5356	0.5291	0.5812		0.5454	0.4941	0.5527		0.5242	0.5299	0.5218		0.5267	0.5535	0.5079
-9.22	0.4974	0.5104	0.4347		0.5421	0.4615	0.4851		0.534	0.5657	0.5812		-9.22	0.5356	0.5283	0.5812		0.547	0.4949	0.5527		0.5242	0.5299	0.5226		0.5267	0.5527	0.5079
-9.21	0.4974	0.5112	0.4347		0.5421	0.4624	0.4851		0.5348	0.5657	0.5812		-9.21	0.5348	0.5275	0.5812		0.5486	0.4949	0.5519		0.5234	0.5299	0.5218		0.5283	0.5511	0.5079
-9.2	0.4965	0.512	0.4339		0.5421	0.4624	0.4868		0.534	0.5641	0.5812		-9.2	0.5348	0.5275	0.582		0.5486	0.4957	0.5519		0.5226	0.5299	0.521		0.5283	0.5503	0.5079
-9.19	0.4965	0.5128	0.4339		0.5421	0.4632	0.4884		0.534	0.5633	0.582		-9.19	0.5348	0.5275	0.582		0.5478	0.4949	0.5519		0.5226	0.5299	0.5201		0.5283	0.5511	0.5079
-9.18	0.4957	0.512	0.4339		0.5421	0.4624	0.49		0.534	0.5633	0.582		-9.18	0.5348	0.5275	0.582		0.5478	0.4941	0.5519		0.5234	0.5299	0.5201		0.5275	0.5519	0.5079
-9.17	0.4965	0.512	0.4347		0.5429	0.4624	0.4892		0.5356	0.5633	0.582		-9.17	0.5356	0.5275	0.5812		0.547	0.4933	0.5535		0.5234	0.5299	0.5201		0.5275	0.5519	0.5088
-9.16	0.4965	0.5128	0.4347		0.5446	0.4615	0.4884		0.5356	0.5633	0.5812		-9.16	0.5364	0.5267	0.582		0.5462	0.4933	0.5543		0.5234	0.5307	0.5201		0.5275	0.5519	0.5088
-9.15	0.4965	0.5144	0.4347		0.5462	0.4615	0.4876		0.5356	0.5625	0.5812		-9.15	0.5372	0.5258	0.5828		0.5446	0.4933	0.5551		0.5226	0.5307	0.5201		0.5283	0.5527	0.5088
-9.14	0.4957	0.5144	0.4339		0.5454	0.4615	0.4876		0.5348	0.5625	0.582		-9.14	0.5372	0.5258	0.5836		0.5446	0.4933	0.5535		0.5226	0.5307	0.5201		0.5299	0.5527	0.5079
-9.13	0.4957	0.5136	0.4339		0.5446	0.4615	0.4868		0.5348	0.5625	0.5828		-9.13	0.5372	0.5267	0.5828		0.5446	0.4933	0.5527		0.5226	0.5299	0.521		0.5307	0.5527	0.5088
-9.12	0.4957	0.512	0.4339		0.5438	0.4615	0.486		0.5364	0.5625	0.5836		-9.12	0.5356	0.5283	0.5828		0.5446	0.4933	0.5519		0.5234	0.5299	0.5218		0.5307	0.5519	0.5088
-9.11	0.4957	0.512	0.4347		0.5438	0.4624	0.486		0.5372	0.5633	0.5836		-9.11	0.5356	0.5291	0.5828		0.5454	0.4933	0.5519		0.5242	0.5299	0.5226		0.5291	0.5519	0.5079
-9.1	0.4957	0.5112	0.4347		0.5429	0.4632	0.486		0.5372	0.5633	0.5828		-9.1	0.5356	0.5291	0.5836		0.5454	0.4933	0.5519		0.5242	0.5291	0.5226		0.5291	0.5519	0.5079
-9.09	0.4957	0.5112	0.4371		0.5421	0.464	0.486		0.5356	0.5641	0.582		-9.09	0.5372	0.5283	0.5828		0.5454	0.4933	0.5519		0.5226	0.5291	0.5226		0.5291	0.5519	0.5088
-9.08	0.4957	0.5104	0.4371		0.5421	0.4632	0.486		0.5348	0.5641	0.5804		-9.08	0.5381	0.5275	0.582		0.5454	0.4941	0.5519		0.521	0.5299	0.5226		0.5299	0.5519	0.5096
-9.07	0.4957	0.5096	0.4371		0.5421	0.4624	0.486		0.5348	0.5641	0.5804		-9.07	0.5372	0.5267	0.5812		0.547	0.4949	0.5519		0.5218	0.5307	0.5226		0.5291	0.5519	0.5088
-9.06	0.4965	0.5088	0.4355		0.5429	0.4624	0.486		0.534	0.5641	0.5804		-9.06	0.5364	0.5258	0.5812		0.5486	0.4957	0.5519		0.5226	0.5307	0.5234		0.5283	0.5519	0.5088
-9.05	0.4965	0.5088	0.4363		0.5429	0.4632	0.4868		0.534	0.5641	0.5812		-9.05	0.5348	0.5258	0.5812		0.5478	0.4949	0.5519		0.5234	0.5307	0.5234		0.5275	0.5519	0.5088
-9.04	0.4965	0.5096	0.4387		0.5429	0.4632	0.4884		0.534	0.5641	0.5812		-9.04	0.5356	0.5258	0.5812		0.547	0.4941	0.5527		0.5226	0.5307	0.5234		0.5275	0.5519	0.5088
-9.03	0.4957	0.5104	0.4379		0.5429	0.4632	0.49		0.534	0.5641	0.5812		-9.03	0.5372	0.5258	0.5812		0.547	0.4933	0.5535		0.5226	0.5307	0.5226		0.5275	0.5527	0.5088
-9.02	0.4965	0.5112	0.4379		0.5429	0.4632	0.4884		0.534	0.5641	0.5812		-9.02	0.5372	0.525	0.582		0.5478	0.4933	0.5535		0.5226	0.5299	0.5226		0.5275	0.5527	0.5096
-9.01	0.4965	0.512	0.4355		0.5429	0.464	0.4876		0.534	0.5633	0.5812		-9.01	0.5364	0.5258	0.5828		0.5478	0.4941	0.5527		0.5226	0.5307	0.5226		0.5283	0.5535	0.5096
-9	0.4965	0.5128	0.4355		0.5421	0.4632	0.4868		0.5348	0.5625	0.5812		-9	0.5356	0.5267	0.5836		0.547	0.4941	0.5519		0.5226	0.5315	0.5218		0.5283	0.5527	0.5088
-8.99	0.4957	0.5128	0.4363		0.5413	0.4632	0.4876		0.5348	0.5625	0.582		-8.99	0.5356	0.5275	0.5836		0.547	0.4949	0.5511		0.5226	0.5332	0.521		0.5299	0.5535	0.5088
-8.98	0.4957	0.512	0.4355		0.5413	0.464	0.486		0.5348	0.5625	0.5828		-8.98	0.5356	0.5275	0.5828		0.5462	0.4941	0.5511		0.5226	0.5324	0.521		0.5299	0.5535	0.5088
-8.97	0.4957	0.5112	0.4355		0.5413	0.464	0.4851		0.5348	0.5633	0.5836		-8.97	0.5364	0.5275	0.5828		0.5454	0.4949	0.5511		0.5226	0.5315	0.5218		0.5299	0.5535	0.5096
-8.96	0.4949	0.5104	0.4339		0.5421	0.464	0.4851		0.534	0.5625	0.5836		-8.96	0.5372	0.5275	0.5828		0.5446	0.4941	0.5519		0.5234	0.5307	0.5218		0.5283	0.5535	0.5088
-8.95	0.4957	0.5104	0.4347		0.5421	0.4632	0.486		0.5332	0.5633	0.5836		-8.95	0.5372	0.5267	0.5836		0.5446	0.4949	0.5519		0.5242	0.5324	0.521		0.5275	0.5535	0.5096
-8.94	0.4965	0.512	0.4355		0.5421	0.464	0.486		0.5332	0.5625	0.5828		-8.94	0.5372	0.5258	0.5828		0.5446	0.4949	0.5519		0.525	0.5332	0.521		0.5283	0.5535	0.5096
-8.93	0.4982	0.512	0.4355		0.5421	0.464	0.486		0.5332	0.5633	0.5812		-8.93	0.5381	0.5258	0.582		0.5446	0.4957	0.5519		0.525	0.5332	0.5226		0.5291	0.5519	0.5112
-8.92	0.4982	0.512	0.4355		0.5429	0.464	0.486		0.5332	0.5633	0.5804		-8.92	0.5381	0.5267	0.5812		0.5462	0.4949	0.5519		0.5242	0.5324	0.5242		0.5291	0.5519	0.5112
-8.91	0.4974	0.5096	0.4355		0.5429	0.464	0.486		0.5324	0.5641	0.5804		-8.91	0.5364	0.5275	0.5812		0.547	0.4949	0.5519		0.5242	0.5315	0.5242		0.5291	0.5527	0.512
-8.9	0.4965	0.5096	0.4363		0.5429	0.464	0.4868		0.5332	0.5633	0.5812		-8.9	0.5356	0.5267	0.582		0.547	0.4949	0.5519		0.5234	0.5307	0.5226		0.5291	0.5535	0.5104
-8.89	0.4957	0.5096	0.4379		0.5429	0.464	0.4868		0.5332	0.5625	0.5812		-8.89	0.5364	0.5267	0.5828		0.5454	0.4957	0.5527		0.5234	0.5307	0.521		0.5299	0.5535	0.5096
-8.88	0.4957	0.5104	0.4371		0.5429	0.464	0.4868		0.534	0.5633	0.5812		-8.88	0.5372	0.5258	0.5836		0.5446	0.4965	0.5527		0.5234	0.5315	0.521		0.5299	0.5527	0.5079
-8.87	0.4974	0.5104	0.4371		0.5438	0.464	0.486		0.534	0.5641	0.5812		-8.87	0.5364	0.5267	0.5828		0.5446	0.4965	0.5519		0.5242	0.5324	0.521		0.5299	0.5527	0.5079
-8.86	0.4974	0.512	0.4355		0.5429	0.464	0.486		0.5348	0.5649	0.5812		-8.86	0.5356	0.5275	0.582		0.5446	0.4965	0.5527		0.5242	0.5324	0.5218		0.5299	0.5519	0.5088
-8.85	0.4974	0.5128	0.4347		0.5429	0.464	0.486		0.534	0.5641	0.582		-8.85	0.5348	0.5283	0.5812		0.5446	0.4957	0.5535		0.5234	0.5324	0.521		0.5299	0.5527	0.5096
-8.84	0.4965	0.5128	0.4347		0.5413	0.464	0.486		0.534	0.5641	0.5828		-8.84	0.5356	0.5291	0.582		0.5446	0.4957	0.5543		0.5226	0.5315	0.521		0.5307	0.5527	0.5104
-8.83	0.4982	0.5112	0.4339		0.5405	0.464	0.486		0.5348	0.5641	0.5836		-8.83	0.5356	0.5283	0.5828		0.5446	0.4949	0.5527		0.5226	0.5307	0.5201		0.5307	0.5527	0.5112
-8.82	0.4998	0.5104	0.4347		0.5405	0.464	0.486		0.5364	0.5641	0.582		-8.82	0.5364	0.5283	0.5836		0.5454	0.4949	0.5519		0.5226	0.5307	0.5201		0.5307	0.5519	0.512
-8.81	0.4998	0.5112	0.4339		0.5413	0.4632	0.486		0.5364	0.5641	0.5804		-8.81	0.5364	0.5275	0.5836		0.5462	0.4949	0.5519		0.5234	0.5315	0.521		0.5291	0.5519	0.5128
-8.8	0.499	0.5112	0.4347		0.5413	0.4624	0.4851		0.5356	0.5641	0.5796		-8.8	0.5372	0.5275	0.5836		0.5462	0.4957	0.5519		0.5242	0.5324	0.5218		0.5291	0.5527	0.512
-8.79	0.4982	0.5112	0.4347		0.5413	0.4624	0.4851		0.5348	0.5633	0.5796		-8.79	0.5364	0.5275	0.5836		0.5454	0.4957	0.5535		0.5242	0.5315	0.5218		0.5291	0.5535	0.512
-8.78	0.4982	0.5104	0.4347		0.5413	0.4632	0.4851		0.5356	0.5633	0.5804		-8.78	0.5364	0.5267	0.5836		0.5446	0.4957	0.5543		0.5234	0.5307	0.5218		0.5299	0.5543	0.5112
-8.77	0.4982	0.5104	0.4355		0.5421	0.464	0.486		0.5356	0.5633	0.5804		-8.77	0.5372	0.5258	0.5836		0.5446	0.4949	0.5551		0.5234	0.5307	0.5226		0.5299	0.5535	0.5112
-8.76	0.4974	0.5104	0.4363		0.5421	0.4632	0.486		0.5356	0.5649	0.5812		-8.76	0.5381	0.5258	0.5836		0.5446	0.4941	0.5543		0.5242	0.5315	0.5242		0.5299	0.5527	0.5104
-8.75	0.4965	0.5104	0.4371		0.5421	0.4624	0.4851		0.5348	0.5657	0.582		-8.75	0.5381	0.5267	0.5828		0.5446	0.4941	0.5535		0.5242	0.5324	0.5242		0.5299	0.5527	0.5096
-8.74	0.4957	0.5104	0.4371		0.5421	0.4632	0.4843		0.5348	0.5665	0.582		-8.74	0.5372	0.5275	0.582		0.5446	0.4941	0.5535		0.5234	0.5324	0.5234		0.5307	0.5527	0.5088
-8.73	0.4957	0.5104	0.4363		0.5429	0.4648	0.4843		0.534	0.5665	0.582		-8.73	0.5364	0.5275	0.582		0.5446	0.4941	0.5527		0.5226	0.5324	0.5218		0.5315	0.5519	0.5088
-8.72	0.4965	0.5112	0.4363		0.5429	0.4664	0.4851		0.534	0.5665	0.5804		-8.72	0.5372	0.5275	0.5828		0.5454	0.4933	0.5527		0.5226	0.5324	0.521		0.5324	0.5503	0.5096
-8.71	0.4974	0.512	0.4355		0.5429	0.4656	0.486		0.534	0.5665	0.5804		-8.71	0.5372	0.5275	0.5836		0.5462	0.4941	0.5519		0.5234	0.5324	0.521		0.5315	0.5503	0.5104
-8.7	0.4974	0.5128	0.4355		0.5413	0.4648	0.4851		0.5348	0.5657	0.5812		-8.7	0.5381	0.5275	0.5828		0.5462	0.4949	0.5519		0.5242	0.5324	0.521		0.5315	0.5511	0.5104
-8.69	0.4982	0.512	0.4339		0.5405	0.464	0.4843		0.5348	0.5649	0.5812		-8.69	0.5372	0.5275	0.582		0.5454	0.4957	0.5527		0.5242	0.5315	0.521		0.5315	0.5519	0.5104
-8.68	0.499	0.5112	0.4339		0.5405	0.4632	0.4843		0.5356	0.5649	0.5804		-8.68	0.5364	0.5275	0.582		0.5446	0.4949	0.5535		0.5242	0.5315	0.521		0.5315	0.5519	0.5112
-8.67	0.5006	0.5104	0.433		0.5421	0.4632	0.4851		0.5364	0.5649	0.5788		-8.67	0.5364	0.5275	0.5828		0.5446	0.4941	0.5543		0.5234	0.5315	0.521		0.5307	0.5519	0.512
-8.66	0.4998	0.5153	0.4339		0.5429	0.4624	0.486		0.5356	0.5649	0.5788		-8.66	0.5364	0.5283	0.5836		0.5454	0.4933	0.5543		0.5242	0.5324	0.5218		0.5299	0.5519	0.5128
-8.65	0.499	0.5153	0.4339		0.5429	0.4624	0.486		0.5348	0.5641	0.5804		-8.65	0.5372	0.5291	0.5836		0.5462	0.4933	0.5535		0.5242	0.5324	0.5218		0.5299	0.5519	0.5128
-8.64	0.4974	0.5153	0.433		0.5421	0.4624	0.486		0.5332	0.5641	0.5804		-8.64	0.5364	0.5307	0.5836		0.547	0.4941	0.5527		0.525	0.5315	0.5226		0.5291	0.5519	0.512
-8.63	0.4965	0.5104	0.433		0.5421	0.4624	0.4868		0.5332	0.5649	0.5804		-8.63	0.5356	0.5299	0.5836		0.547	0.4949	0.5519		0.525	0.5307	0.5234		0.5283	0.5511	0.5112
-8.62	0.4957	0.5104	0.4339		0.5413	0.4624	0.4868		0.5332	0.5649	0.5788		-8.62	0.5372	0.5291	0.5836		0.5478	0.4949	0.5519		0.5242	0.5299	0.5242		0.5275	0.5519	0.5096
-8.61	0.4965	0.5112	0.4355		0.5413	0.4615	0.4868		0.5332	0.5657	0.5796		-8.61	0.5381	0.5283	0.5828		0.5486	0.4941	0.5519		0.5234	0.5299	0.525		0.5275	0.5511	0.5096
-8.6	0.4965	0.512	0.4355		0.5413	0.4615	0.486		0.5332	0.5657	0.5828		-8.6	0.5389	0.5283	0.582		0.5486	0.4949	0.5519		0.5226	0.5299	0.5242		0.5283	0.5511	0.5088
-8.59	0.4965	0.512	0.433		0.5421	0.4632	0.486		0.5324	0.5665	0.5836		-8.59	0.5372	0.5283	0.5812		0.5478	0.4949	0.5527		0.5226	0.5299	0.5234		0.5291	0.5495	0.5096
-8.58	0.4957	0.5112	0.4322		0.5421	0.4648	0.486		0.5332	0.5665	0.5836		-8.58	0.5372	0.5275	0.582		0.5462	0.4949	0.5543		0.5226	0.5299	0.5218		0.5307	0.5503	0.5088
-8.57	0.4957	0.5104	0.4322		0.5429	0.4664	0.486		0.534	0.5665	0.5812		-8.57	0.5381	0.5275	0.5828		0.5454	0.4933	0.5551		0.5226	0.5307	0.521		0.5315	0.5519	0.5088
-8.56	0.4957	0.5112	0.4339		0.5438	0.4656	0.486		0.5348	0.5665	0.5812		-8.56	0.5381	0.5267	0.5836		0.5446	0.4933	0.5551		0.5226	0.5315	0.521		0.5315	0.5535	0.5079
-8.55	0.4965	0.512	0.4347		0.5454	0.4648	0.486		0.534	0.5649	0.5836		-8.55	0.5381	0.5258	0.5836		0.5446	0.4933	0.5543		0.5226	0.5324	0.521		0.5299	0.5535	0.5088
-8.54	0.4974	0.512	0.433		0.5454	0.4648	0.486		0.534	0.5641	0.5836		-8.54	0.5372	0.5258	0.5836		0.5446	0.4933	0.5551		0.5226	0.5315	0.521		0.5291	0.5527	0.5096
-8.53	0.499	0.5104	0.4322		0.5454	0.464	0.486		0.5332	0.5633	0.5836		-8.53	0.5372	0.5275	0.5836		0.5454	0.4933	0.5543		0.5226	0.5307	0.5201		0.5291	0.5519	0.5112
-8.52	0.4982	0.5096	0.4322		0.5438	0.4632	0.4868		0.534	0.5641	0.5812		-8.52	0.5372	0.5291	0.5836		0.5462	0.4933	0.5535		0.5234	0.5299	0.5201		0.5291	0.5519	0.5112
-8.51	0.4974	0.5096	0.4339		0.5429	0.4615	0.4876		0.5332	0.5641	0.5812		-8.51	0.5372	0.5299	0.5828		0.547	0.4933	0.5519		0.5234	0.5299	0.521		0.5283	0.5519	0.5112
-8.5	0.4957	0.5104	0.4347		0.5421	0.4615	0.4876		0.5324	0.5641	0.5836		-8.5	0.5364	0.5299	0.582		0.5462	0.4933	0.5519		0.5226	0.5307	0.521		0.5275	0.5535	0.5104
-8.49	0.4965	0.5104	0.433		0.5413	0.4632	0.4868		0.5315	0.5641	0.5836		-8.49	0.5364	0.5291	0.582		0.5462	0.4925	0.5511		0.5226	0.5307	0.521		0.5275	0.5543	0.5104
-8.48	0.4965	0.5104	0.433		0.5413	0.4632	0.486		0.5315	0.5633	0.5828		-8.48	0.5372	0.5283	0.5828		0.5462	0.4933	0.5511		0.5226	0.5315	0.521		0.5283	0.5543	0.5104
-8.47	0.4957	0.5104	0.433		0.5413	0.464	0.486		0.5332	0.5641	0.5812		-8.47	0.5389	0.5275	0.5836		0.547	0.4933	0.5503		0.5234	0.5307	0.5218		0.5291	0.5527	0.5104
-8.46	0.4949	0.5104	0.4339		0.5421	0.4632	0.4868		0.534	0.5641	0.582		-8.46	0.5389	0.5275	0.5836		0.5478	0.4949	0.5511		0.5226	0.5315	0.5218		0.5299	0.5519	0.5096
-8.45	0.4949	0.5104	0.4339		0.5421	0.4632	0.486		0.534	0.5657	0.5828		-8.45	0.5381	0.5267	0.5836		0.5478	0.4941	0.5511		0.5218	0.5307	0.521		0.5299	0.5519	0.5096
-8.44	0.4957	0.5104	0.4306		0.5421	0.4632	0.4876		0.534	0.5657	0.582		-8.44	0.5372	0.5258	0.5828		0.5478	0.4949	0.5519		0.5218	0.5307	0.5201		0.5299	0.5519	0.5088
-8.43	0.4957	0.5112	0.4306		0.5429	0.464	0.4876		0.534	0.5657	0.5812		-8.43	0.5364	0.5258	0.582		0.5462	0.4941	0.5527		0.5218	0.5299	0.5201		0.5299	0.5519	0.5088
-8.42	0.4957	0.5112	0.4298		0.5438	0.4656	0.4892		0.5348	0.5641	0.5812		-8.42	0.5372	0.5267	0.5812		0.5462	0.4949	0.5535		0.5218	0.5299	0.5201		0.5299	0.5519	0.5088
-8.41	0.4965	0.5112	0.433		0.5446	0.4656	0.4884		0.5348	0.5625	0.5812		-8.41	0.5372	0.5275	0.5812		0.5454	0.4949	0.5543		0.5218	0.5307	0.5201		0.5291	0.5519	0.5096
-8.4	0.4974	0.5104	0.4339		0.5446	0.4648	0.4884		0.5348	0.5617	0.5812		-8.4	0.5381	0.5275	0.582		0.5454	0.4949	0.5543		0.5218	0.5307	0.521		0.5283	0.5519	0.5096
-8.39	0.4974	0.5104	0.4314		0.5446	0.464	0.4876		0.5348	0.5625	0.5804		-8.39	0.5372	0.5275	0.5828		0.5446	0.4941	0.5535		0.5226	0.5307	0.521		0.5267	0.5519	0.5104
-8.38	0.4965	0.5104	0.4314		0.5446	0.4632	0.4868		0.534	0.5633	0.5804		-8.38	0.5364	0.5275	0.5836		0.5446	0.4933	0.5527		0.5226	0.5307	0.5218		0.5267	0.5519	0.512
-8.37	0.4957	0.5112	0.4314		0.5438	0.4624	0.486		0.534	0.5641	0.5804		-8.37	0.5356	0.5267	0.5836		0.5446	0.4933	0.5519		0.5226	0.5307	0.5218		0.5275	0.5519	0.5136
-8.36	0.4957	0.5112	0.4355		0.5438	0.4624	0.486		0.534	0.5633	0.582		-8.36	0.5356	0.5275	0.5828		0.5446	0.4941	0.5519		0.5226	0.5307	0.5218		0.5291	0.5527	0.5136
-8.35	0.4957	0.5112	0.4355		0.5438	0.4632	0.486		0.5348	0.5633	0.582		-8.35	0.5372	0.5283	0.582		0.5446	0.4941	0.5519		0.5226	0.5299	0.521		0.5299	0.5527	0.5112
-8.34	0.4957	0.5104	0.4322		0.5446	0.464	0.4868		0.534	0.5633	0.582		-8.34	0.5381	0.5299	0.582		0.5454	0.4941	0.5519		0.5234	0.5307	0.521		0.5291	0.5527	0.5096
-8.33	0.4957	0.5112	0.4314		0.5438	0.464	0.4868		0.5332	0.5641	0.5812		-8.33	0.5372	0.5291	0.5828		0.5454	0.4941	0.5519		0.5242	0.5315	0.521		0.5291	0.5519	0.5088
-8.32	0.4957	0.5112	0.4314		0.5438	0.464	0.4868		0.5332	0.5633	0.5812		-8.32	0.5372	0.5283	0.5836		0.547	0.4949	0.5519		0.525	0.5315	0.521		0.5291	0.5535	0.5096
-8.31	0.4957	0.5104	0.4347		0.5438	0.464	0.486		0.534	0.5633	0.5812		-8.31	0.5364	0.5267	0.5828		0.5478	0.4957	0.5519		0.5242	0.5307	0.5201		0.5299	0.5535	0.5096
-8.3	0.4957	0.5096	0.4339		0.5438	0.4632	0.4876		0.5348	0.5633	0.582		-8.3	0.5372	0.5267	0.582		0.5486	0.4965	0.5519		0.5234	0.5299	0.5201		0.5307	0.5535	0.5088
-8.29	0.4957	0.5096	0.429		0.5429	0.464	0.4884		0.5348	0.5641	0.582		-8.29	0.5364	0.5267	0.5812		0.5478	0.4965	0.5527		0.5226	0.5299	0.5201		0.5299	0.5511	0.5088
-8.28	0.4957	0.5104	0.429		0.5429	0.464	0.4884		0.5348	0.5641	0.582		-8.28	0.5364	0.5275	0.5812		0.5462	0.4957	0.5535		0.5226	0.5307	0.5201		0.5299	0.5503	0.5096
-8.27	0.4965	0.5112	0.4298		0.5438	0.464	0.4868		0.5348	0.5633	0.5812		-8.27	0.5356	0.5275	0.582		0.5454	0.4949	0.5543		0.5226	0.5315	0.5201		0.5291	0.5495	0.5104
-8.26	0.4965	0.512	0.4347		0.5454	0.4632	0.486		0.5348	0.5633	0.5812		-8.26	0.5348	0.5275	0.5828		0.5454	0.4949	0.5535		0.5226	0.5332	0.5201		0.5299	0.5503	0.5104
-8.25	0.4974	0.5128	0.4347		0.5454	0.464	0.486		0.5348	0.5625	0.582		-8.25	0.5348	0.5275	0.5828		0.5462	0.4949	0.5535		0.5226	0.5332	0.5201		0.5291	0.5511	0.5104
-8.24	0.4965	0.5136	0.4347		0.5446	0.464	0.486		0.5348	0.5625	0.5828		-8.24	0.5348	0.5267	0.582		0.5462	0.4949	0.5527		0.5234	0.5324	0.521		0.5283	0.5519	0.5104
-8.23	0.4974	0.5136	0.4347		0.5429	0.4632	0.486		0.5348	0.5625	0.5836		-8.23	0.5348	0.5267	0.582		0.5446	0.4941	0.5519		0.5234	0.5315	0.521		0.5275	0.5519	0.5104
-8.22	0.4965	0.5136	0.4347		0.5421	0.4615	0.486		0.5348	0.5633	0.5828		-8.22	0.5348	0.5283	0.5828		0.5446	0.4941	0.5511		0.5234	0.5315	0.5218		0.5275	0.5519	0.5096
-8.21	0.4974	0.512	0.4347		0.5429	0.4615	0.4851		0.534	0.5641	0.582		-8.21	0.5348	0.5299	0.5836		0.5446	0.4933	0.5511		0.5234	0.5324	0.521		0.5275	0.5519	0.5088
-8.2	0.4965	0.5112	0.4347		0.5429	0.4615	0.4851		0.5332	0.5641	0.5812		-8.2	0.5356	0.5307	0.5828		0.5454	0.4941	0.5519		0.5234	0.5324	0.521		0.5283	0.5519	0.5079
-8.19	0.4965	0.5104	0.4347		0.5429	0.4624	0.4851		0.5332	0.5641	0.5804		-8.19	0.5372	0.5291	0.582		0.5446	0.4949	0.5519		0.5234	0.5324	0.521		0.5283	0.5519	0.5079
-8.18	0.4957	0.5104	0.4347		0.5421	0.4632	0.486		0.534	0.5641	0.5796		-8.18	0.5389	0.5283	0.5812		0.5446	0.4965	0.5519		0.5234	0.5315	0.5218		0.5291	0.5519	0.5088
-8.17	0.4965	0.5112	0.4347		0.5413	0.464	0.486		0.5348	0.5641	0.5796		-8.17	0.5389	0.5267	0.5812		0.5462	0.4965	0.5519		0.5242	0.5307	0.5218		0.5291	0.5511	0.5088
-8.16	0.4965	0.5112	0.4347		0.5413	0.464	0.486		0.5348	0.5641	0.5796		-8.16	0.5381	0.5267	0.5812		0.547	0.4965	0.5519		0.5242	0.5299	0.521		0.5299	0.5503	0.5088
-8.15	0.4965	0.5112	0.4347		0.5405	0.464	0.4868		0.5348	0.5641	0.5796		-8.15	0.5372	0.5267	0.5812		0.547	0.4957	0.5519		0.5234	0.5307	0.5201		0.5299	0.5503	0.5079
-8.14	0.4965	0.5104	0.4347		0.5413	0.4632	0.4876		0.5348	0.5641	0.5804		-8.14	0.5364	0.5283	0.5812		0.5454	0.4949	0.5527		0.5226	0.5315	0.5201		0.5283	0.5511	0.5079
-8.13	0.4965	0.5104	0.4347		0.5413	0.4624	0.4884		0.5348	0.5633	0.5804		-8.13	0.5356	0.5291	0.5812		0.5446	0.4965	0.5543		0.5226	0.5315	0.5201		0.5283	0.5511	0.5088
-8.12	0.4974	0.5112	0.4347		0.5429	0.4615	0.4876		0.534	0.5633	0.5812		-8.12	0.5356	0.5299	0.5812		0.5454	0.4957	0.5543		0.5234	0.5307	0.5201		0.5275	0.5503	0.5096
-8.11	0.4974	0.512	0.4347		0.5429	0.4615	0.4876		0.5332	0.5633	0.5804		-8.11	0.5364	0.5299	0.5812		0.5462	0.4965	0.5535		0.5242	0.5307	0.521		0.5291	0.5503	0.5112
-8.1	0.4974	0.5136	0.4347		0.5429	0.4615	0.4868		0.5332	0.5641	0.582		-8.1	0.5364	0.5291	0.582		0.5462	0.4949	0.5511		0.5242	0.5315	0.521		0.5275	0.5511	0.5112
-8.09	0.4965	0.5128	0.4347		0.5421	0.4624	0.4868		0.534	0.5641	0.5828		-8.09	0.5364	0.5275	0.582		0.5454	0.4949	0.5519		0.5234	0.5324	0.521		0.5267	0.5519	0.5112
-8.08	0.4957	0.5128	0.4347		0.5421	0.4624	0.486		0.5356	0.5641	0.5828		-8.08	0.5364	0.5267	0.5828		0.5454	0.4941	0.5527		0.5234	0.5315	0.5201		0.5267	0.5511	0.5112
-8.07	0.4957	0.5128	0.4347		0.5421	0.4624	0.486		0.5364	0.5641	0.5828		-8.07	0.5364	0.5267	0.582		0.5462	0.4933	0.5535		0.5234	0.5307	0.521		0.5283	0.5511	0.512
-8.06	0.4957	0.5136	0.4347		0.5421	0.4615	0.486		0.5364	0.5641	0.582		-8.06	0.5364	0.5275	0.582		0.547	0.4941	0.5527		0.5234	0.5307	0.5218		0.5299	0.5519	0.5112
-8.05	0.4957	0.5128	0.4355		0.5421	0.4624	0.486		0.5356	0.5641	0.5828		-8.05	0.5364	0.5275	0.582		0.5462	0.4949	0.5519		0.5234	0.5307	0.5226		0.5299	0.5543	0.5096
-8.04	0.4965	0.5112	0.4355		0.5421	0.4615	0.486		0.5348	0.5641	0.582		-8.04	0.5372	0.5275	0.582		0.5462	0.4941	0.5519		0.5234	0.5307	0.5226		0.5291	0.5535	0.5079
-8.03	0.4965	0.5104	0.4355		0.5421	0.4615	0.486		0.5348	0.5641	0.582		-8.03	0.5364	0.5275	0.582		0.5462	0.4933	0.5519		0.5242	0.5307	0.5226		0.5291	0.5519	0.5079
-8.02	0.4974	0.5104	0.4355		0.5421	0.4615	0.486		0.534	0.5649	0.5812		-8.02	0.5356	0.5267	0.5812		0.5478	0.4925	0.5527		0.5242	0.5307	0.5226		0.5283	0.5495	0.5088
-8.01	0.4965	0.5104	0.4363		0.5429	0.4624	0.4868		0.534	0.5641	0.5812		-8.01	0.5356	0.5267	0.5812		0.5486	0.4941	0.5527		0.525	0.5299	0.5218		0.5291	0.5503	0.5096
-8	0.4965	0.5104	0.4371		0.5429	0.4624	0.4884		0.534	0.5641	0.5804		-8	0.5372	0.5267	0.5804		0.5486	0.4949	0.5527		0.5242	0.5291	0.521		0.5283	0.5511	0.5104
-7.99	0.4965	0.5104	0.4371		0.5429	0.4624	0.4884		0.5348	0.5633	0.5804		-7.99	0.5389	0.5275	0.5796		0.5478	0.4957	0.5527		0.5234	0.5299	0.5201		0.5283	0.5519	0.5096
-7.98	0.4974	0.5112	0.4371		0.5421	0.4632	0.4876		0.5348	0.5633	0.5804		-7.98	0.5389	0.5275	0.5804		0.547	0.4957	0.5543		0.5218	0.5315	0.521		0.5275	0.5519	0.5088
-7.97	0.4982	0.512	0.4363		0.5421	0.4632	0.4851		0.5356	0.5633	0.5812		-7.97	0.5381	0.5267	0.582		0.5462	0.4957	0.5551		0.5218	0.5315	0.5218		0.5275	0.5519	0.5079
-7.96	0.4982	0.5136	0.4355		0.5421	0.4632	0.4843		0.5348	0.5633	0.582		-7.96	0.5372	0.5267	0.5828		0.5454	0.4949	0.5543		0.5218	0.5315	0.5226		0.5283	0.5519	0.5079
-7.95	0.4982	0.5136	0.4347		0.5421	0.4632	0.4843		0.5348	0.5641	0.5828		-7.95	0.5372	0.5267	0.5828		0.5446	0.4941	0.5527		0.5226	0.5299	0.5226		0.5291	0.5519	0.5088
-7.94	0.499	0.512	0.4347		0.5421	0.4632	0.4851		0.5348	0.5641	0.5836		-7.94	0.5372	0.5275	0.5828		0.5446	0.4925	0.5527		0.5226	0.5299	0.5218		0.5299	0.5519	0.5096
-7.93	0.499	0.5104	0.4347		0.5421	0.4624	0.486		0.5356	0.5665	0.5828		-7.93	0.5372	0.5275	0.5828		0.5446	0.4925	0.5527		0.5226	0.5291	0.5218		0.5299	0.5519	0.5096
-7.92	0.499	0.5096	0.4347		0.5421	0.4615	0.4851		0.5356	0.5665	0.582		-7.92	0.5372	0.5275	0.5828		0.5446	0.4925	0.5527		0.5234	0.5299	0.521		0.5291	0.5519	0.5096
-7.91	0.4982	0.5096	0.4347		0.5421	0.4624	0.4851		0.5356	0.5665	0.582		-7.91	0.5372	0.5275	0.5828		0.5454	0.4941	0.5519		0.5242	0.5315	0.5218		0.5283	0.5519	0.5088
-7.9	0.4982	0.5088	0.4347		0.5421	0.4624	0.4851		0.5356	0.5641	0.582		-7.9	0.5372	0.5275	0.5836		0.5454	0.4949	0.5519		0.525	0.5315	0.521		0.5283	0.5519	0.5088
-7.89	0.4974	0.5088	0.4347		0.5421	0.4624	0.486		0.5356	0.5649	0.5812		-7.89	0.5381	0.5275	0.5836		0.5454	0.4941	0.5511		0.5242	0.5315	0.5218		0.5283	0.5527	0.5079
-7.88	0.4965	0.5096	0.4355		0.5421	0.4624	0.486		0.5348	0.5674	0.5804		-7.88	0.5389	0.5275	0.5836		0.5454	0.4925	0.5511		0.5226	0.5307	0.5226		0.5291	0.5535	0.5079
-7.87	0.4957	0.5096	0.4363		0.5421	0.4624	0.486		0.5348	0.5674	0.5796		-7.87	0.5389	0.5275	0.5836		0.5454	0.4917	0.5511		0.5218	0.5307	0.5242		0.5291	0.5527	0.5079
-7.86	0.4957	0.5096	0.4371		0.5421	0.4624	0.486		0.534	0.5665	0.5804		-7.86	0.5372	0.5275	0.5836		0.5454	0.4933	0.5519		0.5218	0.5307	0.5242		0.5299	0.5519	0.5088
-7.85	0.4957	0.5096	0.4371		0.5421	0.4615	0.486		0.5332	0.5649	0.5804		-7.85	0.5364	0.5275	0.5828		0.5446	0.4957	0.5519		0.5226	0.5299	0.5226		0.5299	0.5511	0.5096
-7.84	0.4957	0.5096	0.4363		0.5421	0.4632	0.4851		0.5324	0.5657	0.5804		-7.84	0.5364	0.5275	0.582		0.5446	0.4949	0.5527		0.5226	0.5307	0.521		0.5307	0.5519	0.5096
-7.83	0.4957	0.5104	0.4363		0.5421	0.4648	0.4851		0.5324	0.5674	0.5804		-7.83	0.5364	0.5275	0.5812		0.5454	0.4941	0.5543		0.5226	0.5307	0.521		0.5315	0.5519	0.5096
-7.82	0.4957	0.5112	0.4355		0.5421	0.4664	0.4851		0.5332	0.5674	0.5804		-7.82	0.5356	0.5275	0.582		0.5462	0.4925	0.5551		0.5218	0.5315	0.5218		0.5315	0.5519	0.5088
-7.81	0.4957	0.512	0.4355		0.5413	0.4656	0.486		0.534	0.5674	0.5812		-7.81	0.5356	0.5275	0.5828		0.5462	0.4941	0.5551		0.521	0.5315	0.521		0.5299	0.5519	0.5088
-7.8	0.4965	0.5112	0.4347		0.5413	0.4648	0.486		0.5348	0.5657	0.5812		-7.8	0.5364	0.5275	0.5828		0.5454	0.4941	0.5543		0.5201	0.5332	0.5201		0.5283	0.5519	0.5088
-7.79	0.4974	0.5096	0.4347		0.5405	0.464	0.486		0.5348	0.5649	0.5804		-7.79	0.5372	0.5275	0.5828		0.5438	0.4933	0.5543		0.521	0.534	0.5193		0.5283	0.5519	0.5096
-7.78	0.4982	0.5096	0.4347		0.5413	0.464	0.486		0.5356	0.5657	0.5804		-7.78	0.5372	0.5275	0.582		0.5446	0.4925	0.5535		0.5218	0.534	0.5201		0.5291	0.5519	0.5096
-7.77	0.4982	0.5088	0.4347		0.5413	0.4632	0.486		0.5364	0.5657	0.5796		-7.77	0.5372	0.5275	0.582		0.5446	0.4925	0.5527		0.5234	0.5332	0.521		0.5291	0.5519	0.5088
-7.76	0.4982	0.5096	0.4347		0.5413	0.4632	0.486		0.5372	0.5657	0.5804		-7.76	0.5372	0.5283	0.5812		0.5462	0.4933	0.5519		0.5242	0.5324	0.521		0.5283	0.5527	0.5096
-7.75	0.4974	0.5096	0.4347		0.5413	0.4632	0.4868		0.5364	0.5641	0.5804		-7.75	0.5372	0.5291	0.582		0.5454	0.4933	0.5519		0.525	0.5324	0.521		0.5275	0.5535	0.5096
-7.74	0.4965	0.5104	0.4347		0.5413	0.4632	0.4876		0.5356	0.5641	0.5804		-7.74	0.5372	0.5291	0.5828		0.5462	0.4933	0.5519		0.525	0.5324	0.521		0.5283	0.5535	0.5096
-7.73	0.4957	0.5104	0.4347		0.5421	0.4624	0.4884		0.5348	0.5649	0.5804		-7.73	0.5364	0.5283	0.5828		0.5454	0.4933	0.5519		0.525	0.5324	0.5226		0.5291	0.5535	0.5088
-7.72	0.4957	0.5104	0.4355		0.5421	0.4615	0.4884		0.534	0.5649	0.5804		-7.72	0.5356	0.5275	0.582		0.5454	0.4933	0.5519		0.5226	0.5324	0.5242		0.5307	0.5535	0.5096
-7.71	0.4957	0.5104	0.4355		0.5421	0.4624	0.4876		0.534	0.5657	0.5812		-7.71	0.5356	0.5275	0.5812		0.5446	0.4941	0.5527		0.5218	0.5315	0.5242		0.5307	0.5535	0.5096
-7.7	0.4957	0.5104	0.4363		0.5429	0.4632	0.4868		0.534	0.5657	0.5812		-7.7	0.5364	0.5275	0.5812		0.5446	0.4949	0.5527		0.521	0.5315	0.5234		0.5315	0.5527	0.5088
-7.69	0.4957	0.5112	0.4355		0.5429	0.4648	0.486		0.5348	0.5657	0.5812		-7.69	0.5372	0.5267	0.582		0.5446	0.4957	0.5535		0.5234	0.5315	0.5226		0.5307	0.5519	0.5088
-7.68	0.4957	0.5112	0.4355		0.5429	0.4656	0.486		0.5348	0.5665	0.5812		-7.68	0.5364	0.5267	0.582		0.5454	0.4957	0.5543		0.5242	0.5324	0.5218		0.5307	0.5519	0.5096
-7.67	0.4957	0.5112	0.4339		0.5421	0.4664	0.486		0.534	0.5665	0.5812		-7.67	0.5356	0.5258	0.582		0.5454	0.4957	0.5551		0.5242	0.5324	0.521		0.5307	0.5535	0.5104
-7.66	0.4965	0.5104	0.4339		0.5438	0.4656	0.486		0.534	0.5665	0.5812		-7.66	0.5348	0.5267	0.5812		0.5454	0.4949	0.5551		0.5234	0.5332	0.5201		0.5307	0.5535	0.5104
-7.65	0.4974	0.512	0.4339		0.5446	0.4648	0.486		0.534	0.5649	0.5812		-7.65	0.5356	0.5258	0.582		0.5446	0.4941	0.5543		0.5226	0.534	0.5201		0.5307	0.5535	0.5104
-7.64	0.499	0.512	0.4339		0.5454	0.4648	0.4851		0.5348	0.5641	0.5812		-7.64	0.5364	0.5267	0.5828		0.5438	0.4925	0.5535		0.5226	0.5348	0.5201		0.5299	0.5519	0.512
-7.63	0.499	0.512	0.4339		0.5438	0.464	0.4851		0.534	0.5641	0.5804		-7.63	0.5372	0.5267	0.5828		0.5438	0.4925	0.5527		0.5226	0.534	0.5193		0.5299	0.5519	0.5128
-7.62	0.499	0.5104	0.4339		0.5429	0.4632	0.486		0.5332	0.5641	0.5796		-7.62	0.5364	0.5267	0.582		0.5438	0.4925	0.5519		0.5218	0.5332	0.5193		0.5291	0.5519	0.5136
-7.61	0.4982	0.5104	0.4347		0.5413	0.4615	0.4876		0.5332	0.5633	0.5788		-7.61	0.5364	0.5275	0.5812		0.5446	0.4933	0.5519		0.5218	0.5324	0.5185		0.5291	0.5519	0.5128
-7.6	0.4974	0.5104	0.4347		0.5413	0.4615	0.4876		0.534	0.5633	0.5796		-7.6	0.5364	0.5283	0.582		0.5446	0.4933	0.5519		0.5218	0.5315	0.5201		0.5291	0.5519	0.512
-7.59	0.4974	0.5104	0.4347		0.5413	0.4632	0.4868		0.5348	0.5633	0.5796		-7.59	0.5381	0.5291	0.5828		0.5446	0.4925	0.5519		0.5226	0.5307	0.521		0.5299	0.5519	0.5112
-7.58	0.4974	0.5104	0.4347		0.5421	0.4632	0.486		0.5356	0.5641	0.5796		-7.58	0.5381	0.5283	0.5836		0.5446	0.4925	0.5519		0.5226	0.5299	0.5234		0.5299	0.5519	0.5104
-7.57	0.4974	0.5112	0.4347		0.5421	0.464	0.486		0.5348	0.5649	0.5796		-7.57	0.5381	0.5267	0.5828		0.5446	0.4933	0.5519		0.5218	0.5299	0.5234		0.5299	0.5511	0.5104
-7.56	0.4974	0.5112	0.4347		0.5429	0.4632	0.486		0.5348	0.5657	0.5804		-7.56	0.5372	0.5275	0.5828		0.5446	0.4949	0.5519		0.5218	0.5299	0.5234		0.5307	0.5503	0.5104
-7.55	0.4957	0.5112	0.4339		0.5429	0.464	0.4851		0.534	0.5665	0.5812		-7.55	0.5372	0.5275	0.582		0.5446	0.4965	0.5527		0.5218	0.5307	0.5218		0.5315	0.5486	0.5104
-7.54	0.4957	0.5112	0.4339		0.5421	0.4648	0.4851		0.5348	0.5665	0.5812		-7.54	0.5381	0.5283	0.582		0.5446	0.4965	0.5535		0.5226	0.5315	0.521		0.5315	0.5495	0.5096
-7.53	0.4949	0.5112	0.4339		0.5413	0.4656	0.4851		0.5348	0.5649	0.5812		-7.53	0.5381	0.5275	0.5812		0.5446	0.4965	0.5551		0.5226	0.5324	0.5201		0.5299	0.5503	0.5096
-7.52	0.4957	0.512	0.4347		0.5429	0.4656	0.4868		0.5348	0.5641	0.5804		-7.52	0.5381	0.5275	0.5812		0.5454	0.4957	0.5551		0.5234	0.5324	0.521		0.5283	0.5511	0.5096
-7.51	0.4965	0.5112	0.4347		0.5454	0.464	0.4876		0.5348	0.5633	0.5804		-7.51	0.5372	0.5275	0.5812		0.5454	0.4957	0.5543		0.5234	0.5324	0.521		0.5283	0.5511	0.5096
-7.5	0.4965	0.5104	0.4347		0.5462	0.4632	0.4876		0.534	0.5641	0.5796		-7.5	0.5364	0.5275	0.5812		0.5454	0.4957	0.5527		0.5234	0.5315	0.521		0.5283	0.5495	0.5096
-7.49	0.4974	0.5096	0.4347		0.5446	0.464	0.4868		0.534	0.5641	0.5804		-7.49	0.5356	0.5275	0.5812		0.5446	0.4949	0.5527		0.5226	0.5307	0.5201		0.5283	0.5495	0.5096
-7.48	0.4974	0.5096	0.4347		0.5429	0.464	0.486		0.534	0.5633	0.5796		-7.48	0.5348	0.5275	0.582		0.5446	0.4941	0.5527		0.5234	0.5307	0.521		0.5275	0.5495	0.5096
-7.47	0.4974	0.512	0.4347		0.5421	0.4632	0.486		0.534	0.5625	0.5796		-7.47	0.5356	0.5283	0.582		0.5446	0.4933	0.5527		0.5234	0.5315	0.521		0.5283	0.5519	0.5088
-7.46	0.4965	0.512	0.4355		0.5429	0.4624	0.486		0.5332	0.5625	0.5796		-7.46	0.5364	0.5291	0.582		0.5446	0.4933	0.5519		0.5234	0.5315	0.5226		0.5291	0.5527	0.5088
-7.45	0.4957	0.512	0.4363		0.5429	0.4624	0.486		0.5324	0.5633	0.5812		-7.45	0.5372	0.5299	0.582		0.5454	0.4941	0.5519		0.5226	0.5307	0.5226		0.5291	0.5527	0.5088
-7.44	0.4965	0.5104	0.4371		0.5429	0.464	0.486		0.5332	0.5641	0.582		-7.44	0.5389	0.5299	0.5828		0.5462	0.4949	0.5519		0.5226	0.5307	0.5226		0.5291	0.5519	0.5088
-7.43	0.4974	0.5104	0.4363		0.5413	0.4632	0.486		0.5332	0.5633	0.582		-7.43	0.5397	0.5299	0.5836		0.547	0.4949	0.5527		0.5226	0.5307	0.521		0.5291	0.5519	0.5079
-7.42	0.4982	0.5112	0.4355		0.5413	0.464	0.486		0.534	0.5641	0.5812		-7.42	0.5405	0.5291	0.5828		0.5462	0.4941	0.5535		0.521	0.5315	0.521		0.5291	0.5511	0.5079
-7.41	0.4982	0.512	0.4347		0.5421	0.4632	0.4868		0.5332	0.5649	0.5812		-7.41	0.5397	0.5283	0.582		0.5462	0.4933	0.5543		0.521	0.5307	0.5218		0.5291	0.5511	0.5079
-7.4	0.4965	0.512	0.4347		0.5429	0.464	0.4884		0.534	0.5657	0.5812		-7.4	0.5397	0.5275	0.5812		0.5454	0.4933	0.5543		0.521	0.5307	0.5218		0.5299	0.5527	0.5088
-7.39	0.4957	0.512	0.4355		0.5438	0.4648	0.4892		0.534	0.5641	0.5812		-7.39	0.5397	0.5275	0.5812		0.5454	0.4933	0.5551		0.5226	0.5307	0.521		0.5315	0.5535	0.5088
-7.38	0.4949	0.5112	0.4355		0.5446	0.464	0.4892		0.5348	0.5617	0.5812		-7.38	0.5389	0.5275	0.582		0.5454	0.4925	0.556		0.5226	0.5307	0.5201		0.5307	0.5535	0.5088
-7.37	0.4957	0.512	0.4355		0.5462	0.4632	0.4884		0.5348	0.5617	0.5812		-7.37	0.5381	0.5275	0.5828		0.5462	0.4925	0.556		0.5234	0.5315	0.5201		0.5291	0.5519	0.5079
-7.36	0.4965	0.5112	0.4347		0.547	0.4615	0.4884		0.5348	0.5625	0.5812		-7.36	0.5372	0.5267	0.5836		0.5462	0.4925	0.5551		0.5242	0.5324	0.5201		0.5283	0.5511	0.5088
-7.35	0.4965	0.5112	0.4347		0.5462	0.4615	0.4884		0.5348	0.5641	0.5812		-7.35	0.5372	0.5267	0.5836		0.5454	0.4933	0.5551		0.5242	0.5324	0.521		0.5291	0.5495	0.5096
-7.34	0.4965	0.5104	0.4347		0.5446	0.4632	0.4876		0.534	0.5641	0.5812		-7.34	0.5364	0.5267	0.5836		0.5446	0.4933	0.5543		0.5242	0.5324	0.5218		0.5291	0.5495	0.5112
-7.33	0.4957	0.5104	0.4355		0.5438	0.4632	0.4868		0.5332	0.5625	0.582		-7.33	0.5356	0.5275	0.5836		0.5454	0.4941	0.5535		0.5234	0.5307	0.5226		0.5283	0.5503	0.5104
-7.32	0.4957	0.5104	0.4355		0.5429	0.4632	0.486		0.5332	0.5625	0.582		-7.32	0.5348	0.5283	0.5828		0.5462	0.4941	0.5527		0.5234	0.5307	0.5226		0.5275	0.5519	0.5104
-7.31	0.4957	0.5104	0.4363		0.5429	0.4615	0.486		0.5332	0.5625	0.582		-7.31	0.5356	0.5291	0.582		0.547	0.4941	0.5519		0.5226	0.5307	0.5226		0.5283	0.5519	0.5088
-7.3	0.4957	0.5104	0.4355		0.5421	0.4615	0.4868		0.5332	0.5641	0.582		-7.3	0.5372	0.5299	0.5812		0.5462	0.4933	0.5535		0.5226	0.5307	0.5226		0.5283	0.5519	0.5088
-7.29	0.4957	0.5104	0.4355		0.5421	0.4624	0.4868		0.5332	0.5641	0.582		-7.29	0.5389	0.5291	0.5812		0.5462	0.4933	0.5535		0.5226	0.5307	0.5226		0.5291	0.5519	0.5079
-7.28	0.4957	0.5104	0.4347		0.5421	0.4624	0.4868		0.534	0.5617	0.582		-7.28	0.5397	0.5283	0.5812		0.5454	0.4925	0.5543		0.5226	0.5307	0.5234		0.5283	0.5519	0.5088
-7.27	0.4957	0.5104	0.4363		0.5421	0.4632	0.4868		0.534	0.5617	0.5812		-7.27	0.5389	0.5283	0.582		0.5454	0.4933	0.5527		0.521	0.5307	0.5234		0.5291	0.5527	0.5096
-7.26	0.4965	0.5104	0.4379		0.5421	0.4632	0.4876		0.534	0.5608	0.5812		-7.26	0.5381	0.5283	0.5828		0.5446	0.4941	0.5519		0.521	0.5307	0.5226		0.5291	0.5535	0.5096
-7.25	0.4965	0.5104	0.4387		0.5421	0.464	0.4892		0.534	0.5633	0.582		-7.25	0.5364	0.5283	0.5828		0.5454	0.4949	0.5535		0.521	0.5307	0.521		0.5291	0.5527	0.5088
-7.24	0.4974	0.5104	0.4355		0.5421	0.4648	0.4892		0.5348	0.5633	0.582		-7.24	0.5356	0.5267	0.582		0.5462	0.4941	0.5543		0.5226	0.5315	0.5201		0.5283	0.5519	0.5079
-7.23	0.4974	0.5112	0.4339		0.5438	0.4648	0.4892		0.534	0.5608	0.582		-7.23	0.5356	0.5258	0.5812		0.547	0.4957	0.556		0.5226	0.5315	0.5201		0.5275	0.5511	0.5088
-7.22	0.4982	0.512	0.433		0.5454	0.464	0.4892		0.534	0.56	0.5812		-7.22	0.5356	0.5258	0.5812		0.5462	0.4957	0.5543		0.5226	0.5315	0.521		0.5275	0.5519	0.5096
-7.21	0.4982	0.5136	0.4347		0.5454	0.4624	0.4892		0.534	0.5592	0.582		-7.21	0.5356	0.5258	0.5812		0.5454	0.4965	0.5527		0.5226	0.5324	0.521		0.5283	0.5527	0.5104
-7.2	0.4974	0.5136	0.4347		0.5446	0.4615	0.4884		0.534	0.5625	0.5828		-7.2	0.5356	0.5267	0.582		0.5446	0.4949	0.5519		0.5226	0.534	0.521		0.5283	0.5543	0.5096
-7.19	0.4965	0.5128	0.4347		0.5429	0.4632	0.4868		0.5332	0.5641	0.5836		-7.19	0.5364	0.5267	0.5828		0.5446	0.4949	0.5511		0.5226	0.534	0.521		0.5283	0.5543	0.5096
-7.18	0.4957	0.5112	0.4347		0.5429	0.4632	0.486		0.5324	0.5641	0.5836		-7.18	0.5364	0.5275	0.5836		0.5454	0.4941	0.5519		0.5226	0.5324	0.521		0.5275	0.5535	0.5096
-7.17	0.4957	0.5104	0.4347		0.5421	0.464	0.486		0.5332	0.5641	0.5836		-7.17	0.5364	0.5283	0.5828		0.5454	0.4933	0.5511		0.5234	0.5307	0.5218		0.5275	0.5519	0.5096
-7.16	0.4957	0.5104	0.4347		0.5413	0.4632	0.486		0.534	0.5633	0.5828		-7.16	0.5356	0.5283	0.582		0.5454	0.4933	0.5519		0.5242	0.5299	0.5218		0.5275	0.5519	0.5088
-7.15	0.4957	0.5104	0.4339		0.5413	0.4632	0.486		0.5348	0.5641	0.582		-7.15	0.5364	0.5275	0.582		0.5446	0.4933	0.5527		0.5234	0.5307	0.5226		0.5283	0.5511	0.5096
-7.14	0.4957	0.5104	0.4339		0.5413	0.464	0.486		0.534	0.5641	0.5812		-7.14	0.5356	0.5258	0.5828		0.5446	0.4941	0.5527		0.5218	0.5307	0.5226		0.5291	0.5503	0.5104
-7.13	0.4957	0.5104	0.4347		0.5421	0.464	0.486		0.5332	0.5641	0.5812		-7.13	0.5356	0.5258	0.5828		0.5454	0.4957	0.5535		0.5218	0.5315	0.5226		0.5299	0.5503	0.5112
-7.12	0.4957	0.5104	0.4371		0.5421	0.4648	0.4868		0.5324	0.5641	0.5812		-7.12	0.5348	0.5258	0.582		0.547	0.4965	0.5535		0.5226	0.5315	0.5218		0.5299	0.5511	0.5104
-7.11	0.4957	0.5104	0.4379		0.5421	0.464	0.4876		0.534	0.5649	0.5812		-7.11	0.5348	0.5267	0.582		0.5478	0.4974	0.5535		0.5234	0.5324	0.521		0.5307	0.5511	0.5104
-7.1	0.4957	0.5104	0.4379		0.5421	0.4632	0.4892		0.5348	0.5657	0.5804		-7.1	0.5348	0.5267	0.582		0.5478	0.4974	0.5551		0.5226	0.5324	0.521		0.5307	0.5527	0.5104
-7.09	0.4957	0.5104	0.4371		0.5429	0.464	0.4876		0.5356	0.5657	0.5796		-7.09	0.5348	0.5275	0.582		0.547	0.499	0.5543		0.5226	0.5324	0.5218		0.5307	0.5527	0.5104
-7.08	0.4965	0.5112	0.4371		0.5429	0.4632	0.4868		0.534	0.5674	0.5796		-7.08	0.5348	0.5267	0.582		0.5462	0.4982	0.5543		0.5234	0.5324	0.5226		0.5299	0.5535	0.5104
-7.07	0.4974	0.512	0.4363		0.5429	0.464	0.4851		0.5332	0.5665	0.5812		-7.07	0.5356	0.5267	0.5828		0.5454	0.4974	0.5527		0.5234	0.5324	0.5218		0.5291	0.5519	0.5104
-7.06	0.4982	0.512	0.4355		0.5421	0.4632	0.486		0.5332	0.5665	0.5828		-7.06	0.5356	0.5258	0.5828		0.5446	0.4957	0.5535		0.5234	0.5332	0.521		0.5283	0.5527	0.5104
-7.05	0.4974	0.5112	0.4347		0.5421	0.464	0.486		0.5348	0.5641	0.5836		-7.05	0.5356	0.5267	0.582		0.5446	0.4957	0.5551		0.5226	0.534	0.521		0.5275	0.5535	0.5104
-7.04	0.4965	0.5112	0.4347		0.5413	0.4648	0.486		0.5364	0.5641	0.5836		-7.04	0.5348	0.5267	0.582		0.5446	0.4941	0.5551		0.5234	0.534	0.5218		0.5283	0.5535	0.5104
-7.03	0.4957	0.512	0.4347		0.5405	0.4648	0.486		0.5372	0.5641	0.5828		-7.03	0.5348	0.5283	0.5828		0.5438	0.4933	0.5551		0.5242	0.5332	0.5218		0.5283	0.5527	0.5096
-7.02	0.4974	0.512	0.4347		0.5405	0.464	0.486		0.5364	0.5641	0.582		-7.02	0.5348	0.5291	0.5828		0.5438	0.4925	0.5543		0.525	0.5324	0.521		0.5291	0.5519	0.5096
-7.01	0.4982	0.5112	0.4347		0.5413	0.4632	0.486		0.5356	0.5641	0.5804		-7.01	0.5348	0.5307	0.582		0.5438	0.4941	0.5535		0.525	0.5315	0.521		0.5283	0.5519	0.5088
-7	0.499	0.5104	0.4347		0.5413	0.4624	0.486		0.5348	0.5641	0.5804		-7	0.5348	0.5299	0.5804		0.5446	0.4941	0.5535		0.525	0.5315	0.5218		0.5291	0.5519	0.5088
-6.99	0.4982	0.5104	0.4347		0.5405	0.464	0.486		0.5348	0.5641	0.5796		-6.99	0.5348	0.5299	0.5804		0.5446	0.4925	0.5527		0.525	0.5315	0.5218		0.5291	0.5511	0.5088
-6.98	0.4982	0.5104	0.4355		0.5397	0.464	0.486		0.5348	0.5641	0.5796		-6.98	0.5348	0.5291	0.5812		0.5454	0.4917	0.5535		0.525	0.5324	0.521		0.5299	0.5511	0.5088
-6.97	0.4982	0.5104	0.4363		0.5397	0.4648	0.4851		0.534	0.5641	0.5788		-6.97	0.5348	0.5291	0.5812		0.5462	0.4925	0.5527		0.5242	0.5324	0.5201		0.5299	0.5511	0.5096
-6.96	0.4982	0.5104	0.4371		0.5405	0.464	0.4851		0.534	0.5641	0.5788		-6.96	0.5356	0.5283	0.5812		0.547	0.4957	0.5535		0.5242	0.5315	0.5193		0.5299	0.5519	0.5096
-6.95	0.4974	0.5104	0.4363		0.5413	0.464	0.4843		0.534	0.5649	0.5788		-6.95	0.5356	0.5275	0.5804		0.5462	0.4974	0.5527		0.5234	0.5307	0.5193		0.5299	0.5527	0.5104
-6.94	0.4974	0.5112	0.4363		0.5421	0.4656	0.4851		0.5348	0.5657	0.5788		-6.94	0.5356	0.5275	0.5812		0.5454	0.4949	0.5527		0.5234	0.5307	0.5193		0.5291	0.5527	0.5104
-6.93	0.4965	0.512	0.4363		0.5421	0.4664	0.4843		0.5348	0.5665	0.5796		-6.93	0.5356	0.5275	0.5804		0.5438	0.4933	0.5519		0.5234	0.5307	0.521		0.5283	0.5527	0.5104
-6.92	0.4974	0.512	0.4371		0.5421	0.4664	0.4851		0.5348	0.5665	0.5804		-6.92	0.5356	0.5283	0.5804		0.5438	0.4925	0.5527		0.5234	0.5315	0.521		0.5275	0.5519	0.5096
-6.91	0.4974	0.512	0.4363		0.5421	0.4648	0.4843		0.5348	0.5657	0.5812		-6.91	0.5364	0.5283	0.5804		0.5438	0.4949	0.5535		0.5234	0.5315	0.5201		0.5267	0.5511	0.5088
-6.9	0.499	0.512	0.4355		0.5413	0.464	0.4851		0.5348	0.5649	0.582		-6.9	0.5364	0.5283	0.5812		0.5454	0.4957	0.5543		0.5226	0.5332	0.5201		0.5275	0.5519	0.5088
-6.89	0.4998	0.5112	0.4339		0.5405	0.4648	0.4851		0.5356	0.5641	0.582		-6.89	0.5372	0.5267	0.5812		0.5454	0.4957	0.5543		0.5226	0.5332	0.521		0.5283	0.5519	0.5096
-6.88	0.4998	0.5104	0.4339		0.5405	0.464	0.486		0.5364	0.5641	0.582		-6.88	0.5372	0.5267	0.582		0.5454	0.4957	0.5543		0.5234	0.5332	0.5218		0.5291	0.5527	0.5096
-6.87	0.499	0.5096	0.4339		0.5413	0.4632	0.486		0.5364	0.5641	0.5804		-6.87	0.5372	0.5267	0.5828		0.5446	0.4957	0.5535		0.5242	0.5324	0.521		0.5283	0.5527	0.5088
-6.86	0.4982	0.5104	0.4347		0.5413	0.4615	0.4851		0.5364	0.5641	0.5804		-6.86	0.5372	0.5275	0.5836		0.5446	0.4949	0.5527		0.525	0.5324	0.521		0.5283	0.5535	0.5088
-6.85	0.4974	0.5104	0.4339		0.5413	0.4624	0.4851		0.5364	0.5641	0.5812		-6.85	0.5372	0.5275	0.5836		0.5446	0.4941	0.5519		0.525	0.5324	0.5218		0.5291	0.5551	0.5096
-6.84	0.4974	0.5104	0.4339		0.5413	0.464	0.486		0.5364	0.5641	0.5812		-6.84	0.5372	0.5275	0.5836		0.5446	0.4933	0.5519		0.5242	0.5324	0.5226		0.5291	0.5543	0.5112
-6.83	0.4965	0.5104	0.4347		0.5429	0.464	0.4868		0.5356	0.5641	0.5812		-6.83	0.5364	0.5267	0.5828		0.5454	0.4941	0.5519		0.5242	0.5315	0.5234		0.5291	0.5543	0.5112
-6.82	0.4965	0.5104	0.4363		0.5429	0.4632	0.4868		0.534	0.5649	0.5804		-6.82	0.5356	0.5258	0.582		0.5454	0.4949	0.5519		0.5242	0.5315	0.5242		0.5291	0.5527	0.5112
-6.81	0.4957	0.5096	0.4371		0.5429	0.4624	0.486		0.5332	0.5665	0.5812		-6.81	0.5348	0.5258	0.5812		0.5454	0.4957	0.5519		0.5242	0.5307	0.5234		0.5299	0.5527	0.5096
-6.8	0.4965	0.5096	0.4371		0.5421	0.4632	0.486		0.5332	0.5674	0.5812		-6.8	0.5356	0.5267	0.5812		0.5446	0.4965	0.5519		0.5242	0.5307	0.5234		0.5299	0.5519	0.5096
-6.79	0.4974	0.5096	0.4355		0.5421	0.4648	0.486		0.534	0.5674	0.5804		-6.79	0.5356	0.5275	0.582		0.5446	0.4965	0.5527		0.5234	0.5299	0.5226		0.5291	0.5519	0.5096
-6.78	0.4974	0.5104	0.4347		0.5421	0.4648	0.486		0.5348	0.5665	0.5804		-6.78	0.5364	0.5275	0.5828		0.5454	0.4965	0.5535		0.5242	0.5299	0.5234		0.5291	0.5511	0.5096
-6.77	0.4974	0.5104	0.4339		0.5429	0.4648	0.486		0.534	0.5657	0.5804		-6.77	0.5364	0.5275	0.5836		0.5462	0.4957	0.5543		0.5234	0.5307	0.5226		0.5283	0.5503	0.5088
-6.76	0.4965	0.5104	0.4347		0.5438	0.464	0.486		0.534	0.5649	0.5812		-6.76	0.5372	0.5275	0.5836		0.547	0.4949	0.5543		0.5234	0.5315	0.5226		0.5275	0.5495	0.5088
-6.75	0.4982	0.5104	0.4347		0.5438	0.464	0.486		0.5348	0.5641	0.5812		-6.75	0.5372	0.5275	0.5828		0.5462	0.4941	0.5543		0.5226	0.5315	0.5218		0.5267	0.5495	0.5096
-6.74	0.499	0.5096	0.4339		0.5429	0.4648	0.486		0.5372	0.5641	0.5812		-6.74	0.5372	0.5275	0.5828		0.5454	0.4925	0.5535		0.5234	0.5307	0.521		0.5267	0.5503	0.5104
-6.73	0.4998	0.5096	0.4339		0.5421	0.464	0.486		0.5372	0.5633	0.5812		-6.73	0.5372	0.5275	0.5828		0.5446	0.4925	0.5527		0.5234	0.5299	0.521		0.5275	0.5511	0.5096
-6.72	0.499	0.5096	0.4339		0.5421	0.4632	0.4868		0.5364	0.5633	0.5812		-6.72	0.5372	0.5275	0.5836		0.5454	0.4925	0.5519		0.5242	0.5307	0.521		0.5275	0.5527	0.5088
-6.71	0.4982	0.5104	0.4347		0.5421	0.4624	0.4868		0.534	0.5633	0.582		-6.71	0.5372	0.5283	0.5836		0.5454	0.4933	0.5519		0.5242	0.5307	0.5218		0.5283	0.5543	0.5079
-6.7	0.4982	0.5104	0.4347		0.5421	0.4624	0.4876		0.5332	0.5641	0.582		-6.7	0.5372	0.5283	0.5836		0.5462	0.4933	0.5519		0.5242	0.5307	0.5218		0.5283	0.5551	0.5088
-6.69	0.4974	0.5104	0.4347		0.5421	0.4632	0.4868		0.5324	0.5641	0.5828		-6.69	0.5381	0.5291	0.5836		0.5462	0.4917	0.5519		0.5234	0.5299	0.5226		0.5283	0.5543	0.5096
-6.68	0.4965	0.5104	0.4355		0.5421	0.4624	0.4868		0.5324	0.5649	0.5812		-6.68	0.5381	0.5283	0.5828		0.5462	0.4925	0.5527		0.5226	0.5299	0.5234		0.5283	0.5527	0.5096
-6.67	0.4965	0.5096	0.4363		0.5421	0.4624	0.4868		0.5324	0.5657	0.5812		-6.67	0.5381	0.5283	0.5828		0.5462	0.4925	0.5527		0.5226	0.5299	0.5242		0.5283	0.5511	0.5088
-6.66	0.4965	0.5096	0.4355		0.5421	0.4624	0.4868		0.5315	0.5665	0.5804		-6.66	0.5372	0.5275	0.582		0.5462	0.4949	0.5527		0.5226	0.5307	0.5234		0.5275	0.5511	0.5079
-6.65	0.4965	0.5088	0.4339		0.5421	0.464	0.4868		0.5315	0.5665	0.582		-6.65	0.5372	0.5267	0.5828		0.547	0.4949	0.5519		0.5226	0.5307	0.5226		0.5267	0.5511	0.5079
-6.64	0.4957	0.5096	0.433		0.5429	0.4656	0.486		0.5315	0.5657	0.582		-6.64	0.5364	0.5267	0.5828		0.547	0.4933	0.5527		0.5226	0.5307	0.5218		0.5267	0.5519	0.5079
-6.63	0.4957	0.5096	0.4339		0.5438	0.4656	0.486		0.5332	0.5649	0.582		-6.63	0.5364	0.5267	0.582		0.547	0.4925	0.5543		0.5218	0.5299	0.5226		0.5283	0.5519	0.5088
-6.62	0.4957	0.5104	0.4339		0.5446	0.4648	0.4868		0.5332	0.5641	0.5812		-6.62	0.5364	0.5275	0.5812		0.547	0.4917	0.5551		0.5218	0.5299	0.5226		0.5283	0.5519	0.5096
-6.61	0.4965	0.5104	0.4339		0.5446	0.464	0.4876		0.5332	0.5641	0.5812		-6.61	0.5372	0.5275	0.5804		0.547	0.4941	0.5543		0.5218	0.5307	0.5226		0.5299	0.5519	0.5104
-6.6	0.4982	0.5096	0.4339		0.5438	0.464	0.4876		0.5332	0.5641	0.5812		-6.6	0.5372	0.5275	0.582		0.5462	0.4941	0.5527		0.5226	0.5324	0.5226		0.5299	0.5527	0.5104
-6.59	0.4998	0.5096	0.4347		0.5438	0.4632	0.4868		0.5332	0.5633	0.5812		-6.59	0.5372	0.5283	0.5828		0.5462	0.4925	0.5527		0.5226	0.5332	0.5226		0.5307	0.5527	0.5112
-6.58	0.4998	0.5096	0.4347		0.5438	0.4624	0.4868		0.5332	0.5633	0.5804		-6.58	0.5372	0.5291	0.5836		0.5454	0.4917	0.5527		0.5226	0.5332	0.5218		0.5291	0.5527	0.5128
-6.57	0.499	0.5104	0.4347		0.5438	0.4615	0.4876		0.5324	0.5633	0.5796		-6.57	0.5372	0.5299	0.5836		0.5454	0.4925	0.5527		0.5226	0.5324	0.5218		0.5283	0.5527	0.5136
-6.56	0.4982	0.5104	0.4347		0.5429	0.4615	0.4884		0.5332	0.5633	0.5788		-6.56	0.5381	0.5291	0.5836		0.5446	0.4941	0.5519		0.5226	0.5324	0.521		0.5283	0.5535	0.5136
-6.55	0.4974	0.512	0.4347		0.5429	0.4615	0.4876		0.5332	0.5633	0.5796		-6.55	0.5389	0.5291	0.5828		0.5454	0.4941	0.5527		0.5226	0.5324	0.5218		0.5291	0.556	0.512
-6.54	0.4965	0.512	0.4347		0.5429	0.4615	0.4876		0.5332	0.5633	0.5804		-6.54	0.5389	0.5291	0.582		0.5462	0.4933	0.5519		0.5218	0.5324	0.5226		0.5299	0.5551	0.512
-6.53	0.4965	0.512	0.4339		0.5438	0.4624	0.4868		0.5324	0.5641	0.5812		-6.53	0.5381	0.5291	0.582		0.5478	0.4933	0.5519		0.5218	0.5324	0.5226		0.5299	0.5543	0.5112
-6.52	0.4965	0.5104	0.4339		0.5438	0.4624	0.4876		0.5324	0.5649	0.5812		-6.52	0.5372	0.5283	0.582		0.5486	0.4941	0.5511		0.5218	0.5315	0.5218		0.5299	0.5511	0.5112
-6.51	0.4965	0.5112	0.4339		0.5446	0.464	0.4876		0.5324	0.5657	0.5812		-6.51	0.5372	0.5275	0.5828		0.5486	0.4957	0.5527		0.5226	0.5307	0.5218		0.5299	0.5511	0.5104
-6.5	0.4957	0.5112	0.4347		0.5438	0.4648	0.4884		0.5324	0.5657	0.5812		-6.5	0.5372	0.5275	0.5828		0.5478	0.4974	0.5535		0.5234	0.5299	0.5226		0.5307	0.5503	0.5104
-6.49	0.4957	0.5112	0.4347		0.5438	0.4648	0.4884		0.5324	0.5641	0.5812		-6.49	0.5372	0.5283	0.5828		0.5462	0.4974	0.5551		0.5234	0.5299	0.5234		0.5307	0.5503	0.5104
-6.48	0.4965	0.5104	0.4347		0.5438	0.464	0.4884		0.5332	0.5625	0.5812		-6.48	0.5372	0.5283	0.582		0.5454	0.4974	0.5551		0.5234	0.5299	0.521		0.5315	0.5503	0.5112
-6.47	0.4974	0.5104	0.4347		0.5446	0.4624	0.4876		0.534	0.5617	0.582		-6.47	0.5364	0.5283	0.5812		0.5446	0.4965	0.5543		0.5226	0.5307	0.5201		0.5315	0.5503	0.5112
-6.46	0.4982	0.5104	0.4347		0.5446	0.4624	0.4868		0.5348	0.5625	0.582		-6.46	0.5364	0.5275	0.5812		0.5446	0.4965	0.5527		0.5226	0.5307	0.5201		0.5307	0.5511	0.5112
-6.45	0.499	0.5128	0.4347		0.5438	0.4624	0.486		0.5348	0.5633	0.5812		-6.45	0.5364	0.5275	0.582		0.5446	0.4957	0.5535		0.5234	0.5307	0.521		0.5291	0.5511	0.5112
-6.44	0.4998	0.5136	0.4355		0.5429	0.4615	0.486		0.534	0.5641	0.5804		-6.44	0.5364	0.5283	0.5828		0.5446	0.4957	0.5543		0.5242	0.5307	0.521		0.5275	0.5511	0.512
-6.43	0.4998	0.5136	0.4355		0.5421	0.4615	0.486		0.534	0.5641	0.5804		-6.43	0.5356	0.5291	0.5836		0.5454	0.4949	0.5543		0.525	0.5315	0.521		0.5275	0.5511	0.512
-6.42	0.499	0.512	0.4355		0.5421	0.4615	0.486		0.5332	0.5641	0.582		-6.42	0.5356	0.5307	0.5836		0.5462	0.4941	0.5527		0.525	0.5324	0.521		0.5275	0.5511	0.5112
-6.41	0.4974	0.5112	0.4347		0.5421	0.4624	0.486		0.5332	0.5641	0.582		-6.41	0.5364	0.5299	0.5836		0.5462	0.4933	0.5519		0.5242	0.5315	0.521		0.5275	0.5511	0.5104
-6.4	0.4965	0.5128	0.4347		0.5421	0.4624	0.486		0.5324	0.5641	0.5812		-6.4	0.5364	0.5299	0.5836		0.5454	0.4941	0.5527		0.5234	0.5315	0.5201		0.5283	0.5503	0.5096
-6.39	0.4965	0.512	0.4355		0.5421	0.4607	0.486		0.5332	0.5641	0.5804		-6.39	0.5356	0.5299	0.5836		0.5454	0.4949	0.5527		0.5226	0.5315	0.5201		0.5275	0.5503	0.5096
-6.38	0.4974	0.512	0.4355		0.5421	0.4607	0.486		0.534	0.5649	0.5804		-6.38	0.5348	0.5307	0.5836		0.547	0.4957	0.5535		0.5226	0.5324	0.521		0.5283	0.5511	0.5088
-6.37	0.4974	0.5104	0.4355		0.5421	0.4607	0.486		0.5348	0.5649	0.5812		-6.37	0.5348	0.5299	0.5828		0.5486	0.4957	0.5527		0.5226	0.5324	0.521		0.5283	0.5511	0.5096
-6.36	0.4965	0.5104	0.4347		0.5413	0.4624	0.4868		0.5348	0.5649	0.5804		-6.36	0.5356	0.5283	0.582		0.5486	0.4957	0.5527		0.5226	0.5324	0.5201		0.5299	0.5503	0.5088
-6.35	0.4957	0.5112	0.4339		0.5421	0.4624	0.4884		0.5348	0.5641	0.5804		-6.35	0.5364	0.5275	0.5812		0.5478	0.4949	0.5495		0.5234	0.5324	0.5201		0.5299	0.5503	0.5096
-6.34	0.4957	0.5112	0.4355		0.5429	0.4607	0.4892		0.5348	0.5633	0.5804		-6.34	0.5372	0.5275	0.5812		0.547	0.4941	0.5495		0.5242	0.5315	0.521		0.5291	0.5511	0.5104
-6.33	0.4965	0.5112	0.4355		0.5446	0.4607	0.4884		0.5348	0.5625	0.5812		-6.33	0.5372	0.5275	0.5812		0.547	0.4941	0.5495		0.5242	0.5307	0.5226		0.5283	0.5511	0.5104
-6.32	0.4974	0.512	0.4363		0.5446	0.4607	0.4868		0.534	0.5617	0.5812		-6.32	0.5372	0.5275	0.5812		0.5462	0.4941	0.5519		0.5242	0.5315	0.5226		0.5283	0.5503	0.5096
-6.31	0.4982	0.5128	0.4347		0.5438	0.4624	0.4868		0.534	0.5625	0.582		-6.31	0.5372	0.5275	0.5812		0.5454	0.4941	0.5511		0.5234	0.5315	0.5218		0.5283	0.5503	0.5088
-6.3	0.499	0.5144	0.4347		0.5421	0.4615	0.486		0.534	0.5641	0.5828		-6.3	0.5372	0.5283	0.582		0.5454	0.4941	0.5511		0.5234	0.5324	0.521		0.5291	0.5511	0.5104
-6.29	0.499	0.5136	0.4347		0.5405	0.4615	0.486		0.534	0.5649	0.5836		-6.29	0.5364	0.5291	0.5828		0.5454	0.4941	0.5511		0.5226	0.5307	0.5201		0.5275	0.5519	0.512
-6.28	0.499	0.5136	0.4347		0.5397	0.4615	0.4851		0.5332	0.5649	0.5828		-6.28	0.5364	0.5299	0.5836		0.5462	0.4941	0.5519		0.5226	0.5307	0.521		0.5283	0.5519	0.5112
-6.27	0.4982	0.5128	0.4347		0.5405	0.4615	0.486		0.5332	0.5641	0.582		-6.27	0.5364	0.5299	0.5836		0.5454	0.4941	0.5519		0.5234	0.5299	0.5218		0.5275	0.5519	0.5104
-6.26	0.4982	0.512	0.4347		0.5413	0.4615	0.486		0.5348	0.5641	0.582		-6.26	0.5381	0.5299	0.5828		0.5454	0.4949	0.5527		0.5234	0.5299	0.5226		0.5291	0.5519	0.5088
-6.25	0.4982	0.5128	0.4347		0.5421	0.4615	0.486		0.5356	0.5641	0.582		-6.25	0.5372	0.5291	0.582		0.5454	0.4957	0.5495		0.5234	0.5299	0.5218		0.5291	0.5503	0.5088
-6.24	0.4974	0.5128	0.4347		0.5421	0.4591	0.486		0.5356	0.5641	0.582		-6.24	0.5372	0.5283	0.5804		0.5462	0.4957	0.5503		0.5226	0.5299	0.5218		0.5307	0.5503	0.5079
-6.23	0.4974	0.5128	0.4355		0.5421	0.4591	0.486		0.5348	0.5641	0.5804		-6.23	0.5356	0.5275	0.5812		0.5478	0.4949	0.5503		0.5226	0.5307	0.521		0.5307	0.5503	0.5088
-6.22	0.4974	0.5112	0.4363		0.5421	0.4599	0.4868		0.534	0.5641	0.5804		-6.22	0.5356	0.5275	0.5812		0.5486	0.4941	0.5535		0.5234	0.5307	0.521		0.5307	0.5519	0.5096
-6.21	0.4982	0.5104	0.4371		0.5421	0.4624	0.4884		0.534	0.5641	0.5804		-6.21	0.5348	0.5275	0.5828		0.5495	0.4933	0.5527		0.5242	0.5315	0.521		0.5291	0.5519	0.5096
-6.2	0.4974	0.5104	0.4371		0.5429	0.4632	0.4892		0.534	0.5633	0.5804		-6.2	0.5348	0.5275	0.582		0.5486	0.4933	0.5486		0.5242	0.5315	0.521		0.5283	0.5519	0.5088
-6.19	0.4965	0.5112	0.4363		0.5438	0.4583	0.4892		0.5348	0.5633	0.5796		-6.19	0.5348	0.5275	0.582		0.5478	0.4941	0.5486		0.5242	0.5315	0.521		0.5291	0.5511	0.5088
-6.18	0.4957	0.5128	0.4355		0.5438	0.4583	0.4884		0.534	0.5633	0.5796		-6.18	0.5356	0.5267	0.5812		0.547	0.4949	0.5478		0.5234	0.5315	0.5201		0.5299	0.5503	0.5096
-6.17	0.4965	0.5136	0.4347		0.5429	0.4575	0.4876		0.534	0.5649	0.5812		-6.17	0.5372	0.5267	0.5812		0.5462	0.4949	0.5519		0.5242	0.5315	0.521		0.5307	0.5503	0.5104
-6.16	0.4974	0.5136	0.4347		0.5429	0.4615	0.4868		0.534	0.5649	0.5836		-6.16	0.5389	0.5267	0.582		0.5454	0.4941	0.5535		0.5234	0.5324	0.5218		0.5299	0.5519	0.5104
-6.15	0.4974	0.5136	0.4347		0.5429	0.4615	0.4868		0.5348	0.5649	0.5845		-6.15	0.5389	0.5275	0.5828		0.5454	0.4941	0.5535		0.5242	0.5315	0.5226		0.5291	0.5519	0.5096
-6.14	0.4974	0.5136	0.4347		0.5429	0.4583	0.4868		0.5356	0.5641	0.5836		-6.14	0.5381	0.5275	0.5828		0.5454	0.4941	0.5527		0.5242	0.5307	0.5226		0.5275	0.5519	0.5088
-6.13	0.4965	0.5136	0.4347		0.5421	0.4591	0.4868		0.5364	0.5641	0.582		-6.13	0.5372	0.5267	0.5836		0.5454	0.4941	0.5511		0.525	0.5307	0.5226		0.5267	0.5511	0.5079
-6.12	0.4974	0.512	0.4347		0.5421	0.4599	0.486		0.5372	0.5641	0.582		-6.12	0.5372	0.5275	0.5836		0.5446	0.4941	0.5519		0.525	0.5315	0.5226		0.5267	0.5527	0.5088
-6.11	0.4965	0.5112	0.4347		0.5421	0.464	0.486		0.5364	0.5641	0.5828		-6.11	0.5372	0.5291	0.5845		0.5446	0.4941	0.5519		0.525	0.5332	0.5226		0.5283	0.5535	0.5104
-6.1	0.4965	0.5104	0.4347		0.5429	0.464	0.486		0.5356	0.5641	0.5828		-6.1	0.5364	0.5299	0.5836		0.5454	0.4941	0.5511		0.525	0.5324	0.5226		0.5283	0.5519	0.5112
-6.09	0.4957	0.5096	0.4347		0.5421	0.4599	0.4868		0.534	0.5649	0.582		-6.09	0.5356	0.5283	0.5828		0.547	0.4925	0.5511		0.525	0.5324	0.5218		0.5291	0.5511	0.5112
-6.08	0.4957	0.5088	0.4355		0.5421	0.4599	0.4868		0.534	0.5649	0.5812		-6.08	0.5356	0.5267	0.5828		0.5486	0.4933	0.5511		0.525	0.5315	0.5218		0.5283	0.5503	0.5096
-6.07	0.4965	0.5079	0.4363		0.5421	0.4599	0.4876		0.5348	0.5649	0.5812		-6.07	0.5356	0.5267	0.5828		0.5486	0.4941	0.5519		0.5242	0.5315	0.5218		0.5283	0.5519	0.5096
-6.06	0.4965	0.5079	0.4371		0.5429	0.464	0.4868		0.5356	0.5641	0.5812		-6.06	0.5364	0.5275	0.5828		0.5478	0.4965	0.5527		0.5234	0.5315	0.5226		0.5275	0.5519	0.5079
-6.05	0.4974	0.5088	0.4371		0.5429	0.464	0.4868		0.5348	0.5633	0.5804		-6.05	0.5356	0.5275	0.582		0.5462	0.4965	0.5511		0.5234	0.5307	0.5234		0.5275	0.5511	0.5088
-6.04	0.4965	0.5096	0.4363		0.5421	0.4615	0.486		0.5332	0.5633	0.5804		-6.04	0.5364	0.5275	0.582		0.5454	0.4949	0.5511		0.5234	0.5307	0.5234		0.5275	0.5511	0.5088
-6.03	0.4974	0.5112	0.4355		0.5429	0.4615	0.486		0.5324	0.5625	0.5804		-6.03	0.5356	0.5275	0.582		0.5454	0.4941	0.5503		0.5234	0.5307	0.5234		0.5275	0.5511	0.5104
-6.02	0.4974	0.512	0.4347		0.5429	0.4615	0.4868		0.534	0.5625	0.582		-6.02	0.5356	0.5275	0.582		0.5462	0.4941	0.5519		0.5226	0.5315	0.5218		0.5275	0.5519	0.5104
-6.01	0.4974	0.5128	0.4347		0.5429	0.464	0.4868		0.5348	0.5625	0.5828		-6.01	0.5348	0.5275	0.582		0.5462	0.4957	0.5519		0.5226	0.5315	0.521		0.5291	0.5519	0.5112
-6	0.4965	0.512	0.4347		0.5421	0.464	0.4868		0.5364	0.5625	0.5836		-6	0.5356	0.5275	0.5828		0.5462	0.4957	0.5495		0.5226	0.5315	0.521		0.5299	0.5519	0.512
-5.99	0.4957	0.512	0.4339		0.5421	0.4607	0.486		0.5364	0.5633	0.5836		-5.99	0.5364	0.5283	0.5836		0.5462	0.4941	0.5495		0.5234	0.5307	0.5218		0.5315	0.5519	0.5136
-5.98	0.4957	0.5112	0.4339		0.5413	0.4599	0.486		0.5364	0.5633	0.5836		-5.98	0.5372	0.5291	0.5828		0.547	0.4941	0.5503		0.5242	0.5307	0.5226		0.5307	0.5519	0.5128
-5.97	0.4965	0.5112	0.4339		0.5413	0.4599	0.486		0.5356	0.5633	0.5828		-5.97	0.5372	0.5299	0.5828		0.5462	0.4941	0.5527		0.5234	0.5307	0.5218		0.5299	0.5535	0.512
-5.96	0.4974	0.5104	0.4347		0.5413	0.4632	0.486		0.5348	0.5625	0.582		-5.96	0.5372	0.5283	0.582		0.5462	0.4957	0.5527		0.5226	0.5307	0.5218		0.5291	0.5543	0.5112
-5.95	0.4965	0.5104	0.4347		0.5413	0.464	0.486		0.5356	0.5625	0.5812		-5.95	0.5364	0.5275	0.5828		0.5454	0.4949	0.5519		0.5218	0.5315	0.521		0.5283	0.5543	0.5112
-5.94	0.4957	0.5104	0.4347		0.5413	0.4615	0.486		0.5356	0.5633	0.5812		-5.94	0.5364	0.5267	0.582		0.5454	0.4941	0.5519		0.5226	0.5315	0.521		0.5291	0.5535	0.5112
-5.93	0.4957	0.5104	0.4363		0.5413	0.4615	0.4868		0.5356	0.5649	0.5804		-5.93	0.5364	0.5275	0.582		0.5454	0.4941	0.5519		0.5234	0.5324	0.521		0.5291	0.5535	0.5104
-5.92	0.4974	0.5104	0.4379		0.5421	0.4615	0.4868		0.534	0.5665	0.5804		-5.92	0.5356	0.5275	0.5812		0.5454	0.4957	0.5527		0.5234	0.5324	0.5218		0.5299	0.5543	0.5104
-5.91	0.4974	0.5104	0.4379		0.5429	0.464	0.4868		0.534	0.5674	0.5812		-5.91	0.5348	0.5275	0.5812		0.5454	0.4974	0.5535		0.5234	0.5315	0.5234		0.5299	0.5535	0.5104
-5.9	0.4965	0.5112	0.4371		0.5429	0.4648	0.486		0.534	0.5674	0.5812		-5.9	0.534	0.5275	0.5812		0.5446	0.4982	0.5543		0.5226	0.5315	0.5226		0.5291	0.5519	0.5104
-5.89	0.4957	0.512	0.4355		0.5429	0.464	0.486		0.534	0.5665	0.5812		-5.89	0.5356	0.5275	0.5812		0.5446	0.4974	0.5535		0.5234	0.5315	0.5226		0.5307	0.5511	0.5104
-5.88	0.4957	0.5128	0.4355		0.5413	0.464	0.4851		0.534	0.5657	0.5804		-5.88	0.5356	0.5275	0.5812		0.5446	0.4974	0.5527		0.5234	0.5324	0.521		0.5307	0.5511	0.5104
-5.87	0.4957	0.5136	0.4347		0.5405	0.4632	0.4851		0.534	0.5657	0.5812		-5.87	0.5356	0.5275	0.5812		0.5446	0.4965	0.5519		0.5234	0.5324	0.521		0.5315	0.5519	0.5104
-5.86	0.4974	0.5128	0.4347		0.5405	0.464	0.4851		0.5356	0.5649	0.5812		-5.86	0.5348	0.5275	0.582		0.5446	0.4965	0.5519		0.5226	0.5315	0.521		0.5299	0.5519	0.5104
-5.85	0.499	0.5112	0.4347		0.5413	0.464	0.486		0.5364	0.5657	0.5804		-5.85	0.5348	0.5275	0.5828		0.5446	0.4949	0.5519		0.5234	0.5307	0.521		0.5299	0.5527	0.5096
-5.84	0.5006	0.5112	0.4347		0.5413	0.4632	0.4851		0.5372	0.5657	0.5804		-5.84	0.5356	0.5275	0.5828		0.5446	0.4949	0.5527		0.5242	0.5299	0.521		0.5307	0.5527	0.5096
-5.83	0.4998	0.5104	0.4347		0.5413	0.4624	0.4851		0.5364	0.5657	0.5804		-5.83	0.5364	0.5275	0.5836		0.5446	0.4949	0.5535		0.525	0.5299	0.521		0.5299	0.5535	0.5104
-5.82	0.499	0.5112	0.4347		0.5421	0.4624	0.4851		0.5364	0.5649	0.5812		-5.82	0.5372	0.5275	0.5836		0.5446	0.4949	0.5543		0.525	0.5299	0.521		0.5299	0.5543	0.5112
-5.81	0.499	0.5096	0.4347		0.5429	0.4632	0.486		0.5356	0.5633	0.5804		-5.81	0.5372	0.5275	0.5845		0.5446	0.4941	0.5535		0.525	0.5299	0.521		0.5283	0.5551	0.5112
-5.8	0.4982	0.5104	0.4347		0.5429	0.464	0.486		0.5356	0.5633	0.5796		-5.8	0.5364	0.5275	0.5828		0.5454	0.4933	0.5527		0.5242	0.5307	0.5218		0.5291	0.5551	0.5104
-5.79	0.4974	0.5112	0.4355		0.5421	0.464	0.486		0.5348	0.5641	0.5796		-5.79	0.5364	0.5283	0.5828		0.5454	0.4933	0.5527		0.5242	0.5307	0.5234		0.5291	0.5535	0.5104
-5.78	0.4957	0.5112	0.4371		0.5421	0.464	0.486		0.5348	0.5665	0.5796		-5.78	0.5356	0.5291	0.582		0.5462	0.4941	0.5535		0.5242	0.5315	0.525		0.5291	0.5527	0.5104
-5.77	0.4965	0.5112	0.4379		0.5421	0.464	0.486		0.534	0.5674	0.5796		-5.77	0.5381	0.5291	0.582		0.5454	0.4949	0.5543		0.525	0.5315	0.5242		0.5283	0.5519	0.5104
-5.76	0.4965	0.5112	0.4371		0.5429	0.464	0.486		0.5348	0.5682	0.5796		-5.76	0.5372	0.5283	0.582		0.5454	0.4965	0.5543		0.5242	0.5315	0.5242		0.5291	0.5519	0.5104
-5.75	0.4974	0.5112	0.4347		0.5429	0.464	0.486		0.534	0.5674	0.5804		-5.75	0.5372	0.5275	0.582		0.5446	0.4974	0.5535		0.5242	0.5315	0.5234		0.5307	0.5519	0.5104
-5.74	0.4974	0.512	0.4339		0.5429	0.4648	0.4851		0.5348	0.5665	0.5812		-5.74	0.5356	0.5275	0.582		0.5454	0.4974	0.5551		0.5234	0.5315	0.5234		0.5324	0.5519	0.5104
-5.73	0.4982	0.5112	0.4339		0.5421	0.4648	0.4851		0.534	0.5649	0.5804		-5.73	0.5364	0.5275	0.5812		0.5454	0.4957	0.5551		0.5234	0.5324	0.5226		0.5315	0.5511	0.5104
-5.72	0.4982	0.5104	0.4347		0.5421	0.4648	0.486		0.5348	0.5649	0.5804		-5.72	0.5381	0.5275	0.582		0.5462	0.4941	0.556		0.5234	0.5324	0.5226		0.5307	0.5511	0.5104
-5.71	0.4982	0.5096	0.4347		0.5429	0.464	0.4868		0.5356	0.5649	0.5804		-5.71	0.5389	0.5275	0.5828		0.5454	0.4933	0.5535		0.5234	0.5332	0.5234		0.5299	0.5511	0.5112
-5.7	0.499	0.5088	0.4347		0.5438	0.4632	0.4876		0.5348	0.5641	0.5804		-5.7	0.5397	0.5275	0.5828		0.5454	0.4933	0.5535		0.5234	0.534	0.5234		0.5299	0.5511	0.512
-5.69	0.4998	0.5112	0.4347		0.5438	0.4632	0.4868		0.534	0.5633	0.5804		-5.69	0.5389	0.5283	0.5828		0.5446	0.4941	0.5535		0.5234	0.534	0.5234		0.5307	0.5503	0.5128
-5.68	0.5006	0.5104	0.4347		0.5429	0.4624	0.4868		0.5332	0.5633	0.5804		-5.68	0.5381	0.5299	0.5828		0.5454	0.4949	0.5535		0.5242	0.5332	0.5218		0.5307	0.5503	0.5112
-5.67	0.5006	0.5104	0.4347		0.5421	0.4624	0.486		0.5332	0.5641	0.5804		-5.67	0.5372	0.5307	0.5836		0.5462	0.4949	0.5527		0.5258	0.5324	0.521		0.5299	0.5503	0.5096
-5.66	0.4998	0.5112	0.4347		0.5421	0.4615	0.486		0.5348	0.5641	0.5804		-5.66	0.5364	0.5307	0.5828		0.547	0.4949	0.5519		0.5258	0.5315	0.521		0.5291	0.5511	0.5079
-5.65	0.499	0.5112	0.4347		0.5421	0.4615	0.4868		0.5348	0.5641	0.5804		-5.65	0.5364	0.5299	0.582		0.547	0.4949	0.5519		0.5258	0.5315	0.5226		0.5291	0.5511	0.5088
-5.64	0.4974	0.512	0.4347		0.5421	0.4624	0.4868		0.5356	0.5649	0.5812		-5.64	0.5372	0.5299	0.582		0.547	0.499	0.5519		0.5234	0.5307	0.5242		0.5299	0.5519	0.5096
-5.63	0.4965	0.5096	0.4347		0.5421	0.4632	0.4868		0.5348	0.5657	0.5812		-5.63	0.5389	0.5299	0.5812		0.547	0.499	0.5527		0.5226	0.5299	0.5234		0.5299	0.5527	0.5096
-5.62	0.4957	0.5104	0.4347		0.5421	0.4632	0.486		0.5348	0.5674	0.5812		-5.62	0.5405	0.5291	0.5812		0.5462	0.499	0.5535		0.5218	0.5299	0.5226		0.5299	0.5519	0.5088
-5.61	0.4957	0.5112	0.4339		0.5421	0.4632	0.486		0.5356	0.5674	0.5812		-5.61	0.5397	0.5283	0.5804		0.5454	0.4949	0.5543		0.5226	0.5307	0.521		0.5307	0.5519	0.5079
-5.6	0.4957	0.5128	0.4339		0.5429	0.464	0.486		0.5356	0.5665	0.582		-5.6	0.5397	0.5275	0.5812		0.5446	0.4941	0.5543		0.5226	0.5324	0.5218		0.5315	0.5519	0.5079
-5.59	0.4957	0.5128	0.4339		0.5446	0.4648	0.4868		0.5348	0.5649	0.582		-5.59	0.5372	0.5275	0.5812		0.5462	0.4949	0.5535		0.5226	0.5315	0.521		0.5324	0.5527	0.5088
-5.58	0.4957	0.512	0.4347		0.5462	0.464	0.4876		0.534	0.5641	0.582		-5.58	0.5364	0.5275	0.5812		0.547	0.4949	0.5527		0.5226	0.5315	0.5218		0.5315	0.5527	0.5088
-5.57	0.4965	0.5104	0.4347		0.5462	0.4624	0.4884		0.534	0.5641	0.5812		-5.57	0.5356	0.5275	0.5812		0.5478	0.4949	0.5519		0.5226	0.5307	0.5218		0.5307	0.5519	0.5088
-5.56	0.4974	0.5104	0.4347		0.5454	0.4624	0.4876		0.5348	0.5633	0.5812		-5.56	0.5364	0.5275	0.582		0.547	0.4941	0.5527		0.5226	0.5307	0.5234		0.5299	0.5519	0.5088
-5.55	0.499	0.5112	0.4347		0.5438	0.4624	0.4876		0.5348	0.5633	0.5812		-5.55	0.5372	0.5275	0.582		0.547	0.4941	0.5527		0.5234	0.5307	0.5234		0.5299	0.5519	0.5088
-5.54	0.499	0.5112	0.4347		0.5438	0.4632	0.4876		0.534	0.5633	0.5804		-5.54	0.5364	0.5283	0.5828		0.547	0.4941	0.5535		0.5234	0.5315	0.5226		0.5299	0.5519	0.5088
-5.53	0.499	0.5112	0.4347		0.5429	0.4624	0.4876		0.5332	0.5641	0.5796		-5.53	0.5364	0.5291	0.5828		0.547	0.4941	0.5527		0.5234	0.5324	0.5218		0.5291	0.5519	0.5096
-5.52	0.4982	0.5104	0.4355		0.5438	0.4632	0.4868		0.5324	0.5641	0.5796		-5.52	0.5381	0.5299	0.5836		0.547	0.4949	0.5527		0.5234	0.5324	0.5218		0.5291	0.5527	0.5112
-5.51	0.4974	0.5104	0.4355		0.5429	0.4632	0.486		0.5324	0.5641	0.5804		-5.51	0.5397	0.5299	0.5836		0.547	0.4949	0.5519		0.5242	0.5324	0.5226		0.5283	0.5535	0.512
-5.5	0.4965	0.5096	0.4355		0.5429	0.4632	0.4868		0.5324	0.5649	0.582		-5.5	0.5405	0.5299	0.5836		0.547	0.4949	0.5519		0.5242	0.5315	0.5226		0.5291	0.5543	0.5112
-5.49	0.4957	0.5096	0.4347		0.5421	0.4632	0.4868		0.5332	0.5649	0.5828		-5.49	0.5389	0.5291	0.5836		0.547	0.4949	0.5519		0.5234	0.5307	0.5226		0.5291	0.5527	0.5104
-5.48	0.4965	0.5096	0.4347		0.5421	0.4624	0.4876		0.534	0.5649	0.5828		-5.48	0.5381	0.5283	0.5836		0.5462	0.4957	0.5519		0.5226	0.5299	0.5226		0.5291	0.5519	0.5096
-5.47	0.4974	0.5104	0.4347		0.5429	0.464	0.4884		0.5348	0.5641	0.582		-5.47	0.5389	0.5267	0.5828		0.5462	0.4957	0.5527		0.5226	0.5299	0.5218		0.5291	0.5511	0.5088
-5.46	0.4974	0.5104	0.4347		0.5429	0.4632	0.49		0.534	0.5633	0.5812		-5.46	0.5389	0.5267	0.582		0.5454	0.4957	0.5535		0.5234	0.5307	0.5226		0.5291	0.5519	0.5079
-5.45	0.4965	0.5104	0.4347		0.5429	0.4632	0.49		0.534	0.5633	0.5812		-5.45	0.5389	0.5267	0.5812		0.5462	0.4949	0.5535		0.5234	0.5315	0.5226		0.5307	0.5527	0.5079
-5.44	0.4957	0.5104	0.4347		0.5438	0.4624	0.4892		0.534	0.5625	0.5812		-5.44	0.5364	0.5275	0.5812		0.5462	0.4941	0.5535		0.5234	0.5315	0.5234		0.5291	0.5527	0.5079
-5.43	0.4957	0.5104	0.4347		0.5454	0.4624	0.4884		0.5348	0.5633	0.5812		-5.43	0.5364	0.5267	0.5812		0.5462	0.4933	0.5535		0.5226	0.5315	0.5218		0.5291	0.5527	0.5088
-5.42	0.4957	0.5112	0.4347		0.5462	0.4624	0.4876		0.5348	0.5625	0.5812		-5.42	0.5364	0.5258	0.5812		0.5454	0.4933	0.5535		0.5226	0.5324	0.5218		0.5275	0.5519	0.5096
-5.41	0.4965	0.5112	0.4347		0.5454	0.4624	0.4868		0.534	0.5633	0.582		-5.41	0.5372	0.5258	0.582		0.5454	0.4933	0.5527		0.5234	0.534	0.5218		0.5291	0.5519	0.5104
-5.4	0.4982	0.5112	0.4347		0.5446	0.4632	0.4868		0.5332	0.5633	0.5828		-5.4	0.5372	0.5267	0.5828		0.5462	0.4933	0.5527		0.5234	0.534	0.5218		0.5291	0.5519	0.5112
-5.39	0.4982	0.5104	0.4347		0.5446	0.464	0.4868		0.5332	0.5641	0.5836		-5.39	0.5364	0.5275	0.5836		0.547	0.4941	0.5527		0.5234	0.5332	0.5218		0.5291	0.5519	0.512
-5.38	0.4974	0.5112	0.4355		0.5438	0.464	0.4876		0.5332	0.5641	0.5836		-5.38	0.5364	0.5283	0.5836		0.547	0.4941	0.5527		0.5226	0.5324	0.5218		0.5291	0.5527	0.512
-5.37	0.4965	0.5112	0.4355		0.5429	0.464	0.4876		0.534	0.5641	0.5836		-5.37	0.5381	0.5291	0.5836		0.547	0.4941	0.5527		0.5226	0.5315	0.5226		0.5291	0.5527	0.5104
-5.36	0.4965	0.5112	0.4355		0.5429	0.464	0.4876		0.534	0.5649	0.5828		-5.36	0.5397	0.5283	0.5836		0.547	0.4941	0.5535		0.5226	0.5307	0.5226		0.5291	0.5527	0.5088
-5.35	0.4974	0.5104	0.4347		0.5429	0.464	0.4868		0.5348	0.5649	0.582		-5.35	0.5405	0.5275	0.5836		0.547	0.4949	0.5543		0.5226	0.5307	0.5218		0.5283	0.5527	0.5088
-5.34	0.4965	0.5104	0.4347		0.5429	0.464	0.486		0.5348	0.5649	0.5812		-5.34	0.5389	0.5258	0.5836		0.5478	0.4949	0.5543		0.5226	0.5315	0.521		0.5283	0.5519	0.5088
-5.33	0.4965	0.5104	0.4347		0.5421	0.464	0.4868		0.5348	0.5633	0.5812		-5.33	0.5381	0.5267	0.5836		0.5478	0.4949	0.5543		0.5226	0.5315	0.5201		0.5291	0.5519	0.5096
-5.32	0.4957	0.5104	0.4347		0.5421	0.464	0.4884		0.5348	0.5625	0.5812		-5.32	0.5364	0.5258	0.5836		0.5478	0.4957	0.5543		0.5226	0.5315	0.5201		0.5299	0.5519	0.5096
-5.31	0.4957	0.5104	0.4347		0.5421	0.4632	0.4892		0.5348	0.5625	0.5812		-5.31	0.5364	0.5267	0.5828		0.547	0.4965	0.5551		0.5226	0.5324	0.521		0.5299	0.5527	0.5096
-5.3	0.4957	0.5104	0.4355		0.5421	0.4624	0.4892		0.534	0.5625	0.5812		-5.3	0.5356	0.5267	0.5828		0.547	0.4965	0.556		0.5226	0.5332	0.5218		0.5299	0.5535	0.5104
-5.29	0.4965	0.5112	0.4355		0.5421	0.4615	0.4876		0.534	0.5633	0.5812		-5.29	0.5356	0.5275	0.5828		0.547	0.4957	0.5568		0.5226	0.5324	0.5218		0.5307	0.5527	0.5104
-5.28	0.4965	0.5128	0.4355		0.5429	0.4624	0.4876		0.534	0.5625	0.582		-5.28	0.5348	0.5275	0.5836		0.5462	0.4957	0.556		0.5226	0.5307	0.5218		0.5307	0.5527	0.5112
-5.27	0.4965	0.5136	0.4347		0.5429	0.4632	0.4868		0.5356	0.5633	0.5828		-5.27	0.5348	0.5283	0.5836		0.5454	0.4957	0.5551		0.5234	0.5307	0.521		0.5307	0.5519	0.5104
-5.26	0.4965	0.5136	0.4347		0.5429	0.464	0.4868		0.5356	0.5633	0.5836		-5.26	0.5348	0.5283	0.5828		0.5454	0.4957	0.5543		0.5234	0.5307	0.5218		0.5291	0.5519	0.5104
-5.25	0.4982	0.512	0.4347		0.5421	0.464	0.4851		0.5348	0.5641	0.5836		-5.25	0.5356	0.5291	0.5828		0.5454	0.4949	0.5543		0.5234	0.5315	0.521		0.5283	0.5535	0.5104
-5.24	0.4982	0.512	0.4347		0.5421	0.464	0.4851		0.5348	0.5641	0.5828		-5.24	0.5364	0.5291	0.582		0.5454	0.4949	0.5543		0.5234	0.5307	0.5218		0.5283	0.5535	0.5096
-5.23	0.4982	0.5112	0.4347		0.5413	0.4632	0.4851		0.5348	0.5641	0.582		-5.23	0.5364	0.5299	0.5828		0.5446	0.4949	0.5535		0.5242	0.5307	0.5218		0.5291	0.5535	0.5096
-5.22	0.4974	0.5112	0.4347		0.5413	0.4624	0.486		0.5364	0.5641	0.5812		-5.22	0.5356	0.5291	0.582		0.5446	0.4949	0.5527		0.525	0.5307	0.5218		0.5291	0.5519	0.5088
-5.21	0.4974	0.5104	0.4347		0.5413	0.4624	0.486		0.5364	0.5649	0.5812		-5.21	0.5348	0.5283	0.582		0.5454	0.4941	0.5519		0.5242	0.5315	0.521		0.5291	0.5519	0.5088
-5.2	0.4965	0.5104	0.4347		0.5421	0.4632	0.486		0.5364	0.5657	0.5812		-5.2	0.5356	0.5283	0.582		0.5462	0.4941	0.5519		0.5242	0.5324	0.521		0.5291	0.5519	0.5088
-5.19	0.4957	0.5104	0.4355		0.5421	0.464	0.486		0.5356	0.5674	0.5812		-5.19	0.5364	0.5291	0.582		0.547	0.4949	0.5519		0.5234	0.5324	0.5218		0.5291	0.5527	0.5088
-5.18	0.4965	0.5104	0.4355		0.5421	0.4632	0.4868		0.534	0.5674	0.5804		-5.18	0.5364	0.5291	0.582		0.5462	0.4957	0.5527		0.5234	0.5315	0.5218		0.5291	0.5535	0.5088
-5.17	0.4965	0.5104	0.4355		0.5421	0.4632	0.4884		0.5348	0.5674	0.5796		-5.17	0.5364	0.5283	0.582		0.5454	0.4949	0.5543		0.5226	0.5307	0.5218		0.5291	0.5535	0.5088
-5.16	0.4974	0.5104	0.4347		0.5421	0.4624	0.4892		0.5348	0.5657	0.5796		-5.16	0.5356	0.5275	0.582		0.5446	0.4949	0.5551		0.5226	0.5307	0.5218		0.5299	0.5519	0.5088
-5.15	0.4974	0.5104	0.4347		0.5421	0.4632	0.4892		0.5356	0.5641	0.5804		-5.15	0.5356	0.5275	0.582		0.5446	0.4949	0.5551		0.5234	0.5315	0.5218		0.5299	0.5519	0.5096
-5.14	0.4974	0.5112	0.4347		0.5429	0.4632	0.4884		0.5348	0.5641	0.5812		-5.14	0.5348	0.5275	0.5812		0.5446	0.4957	0.5543		0.5242	0.5324	0.5218		0.5307	0.5519	0.5088
-5.13	0.4974	0.5128	0.4347		0.5429	0.464	0.4884		0.5348	0.5649	0.582		-5.13	0.5356	0.5275	0.582		0.5446	0.4965	0.5543		0.5242	0.5315	0.521		0.5315	0.5519	0.5088
-5.12	0.4965	0.5144	0.4347		0.5429	0.464	0.4876		0.5348	0.5657	0.5828		-5.12	0.5356	0.5275	0.5828		0.5446	0.4965	0.5535		0.5242	0.5315	0.5218		0.5315	0.5511	0.5088
-5.11	0.4974	0.5144	0.4347		0.5421	0.464	0.4868		0.5356	0.5649	0.5836		-5.11	0.5364	0.5275	0.5828		0.5446	0.4965	0.5527		0.5234	0.5315	0.521		0.5307	0.5511	0.5104
-5.1	0.4974	0.5128	0.4347		0.5413	0.4632	0.4851		0.5364	0.5641	0.5828		-5.1	0.5364	0.5283	0.5828		0.5454	0.4957	0.5527		0.5242	0.5315	0.5218		0.5299	0.5527	0.5128
-5.09	0.4974	0.5128	0.4355		0.5405	0.4632	0.4851		0.5372	0.5641	0.5828		-5.09	0.5381	0.5291	0.5828		0.5454	0.4965	0.5527		0.5242	0.5307	0.5218		0.5291	0.5527	0.5136
-5.08	0.4965	0.5128	0.4355		0.5405	0.4632	0.4851		0.5364	0.5641	0.582		-5.08	0.5372	0.5307	0.5828		0.5454	0.4965	0.5527		0.525	0.5299	0.5226		0.5291	0.5527	0.5136
-5.07	0.4974	0.5128	0.4355		0.5413	0.4632	0.486		0.5356	0.5633	0.582		-5.07	0.5372	0.5291	0.582		0.5454	0.4957	0.5519		0.525	0.5299	0.5226		0.5291	0.5519	0.512
-5.06	0.4974	0.5112	0.4347		0.5421	0.4632	0.486		0.5348	0.5633	0.5812		-5.06	0.5356	0.5283	0.5812		0.5462	0.4949	0.5527		0.525	0.5299	0.5226		0.5299	0.5511	0.5104
-5.05	0.4974	0.5104	0.4347		0.5421	0.4624	0.486		0.5348	0.5633	0.5804		-5.05	0.5356	0.5267	0.5812		0.5462	0.4949	0.5527		0.5242	0.5299	0.5234		0.5299	0.5511	0.5088
-5.04	0.4965	0.5096	0.4355		0.5421	0.4632	0.4868		0.534	0.5649	0.5804		-5.04	0.5364	0.5275	0.5812		0.5454	0.4957	0.5527		0.5234	0.5307	0.5242		0.5291	0.5519	0.512
-5.03	0.4974	0.5096	0.4363		0.5421	0.4624	0.4868		0.534	0.5649	0.5796		-5.03	0.5364	0.5275	0.5812		0.5446	0.4957	0.5519		0.5226	0.5315	0.5242		0.5291	0.5535	0.512
-5.02	0.4974	0.5088	0.4371		0.5429	0.4632	0.4868		0.5332	0.5649	0.5804		-5.02	0.5364	0.5267	0.582		0.5454	0.4965	0.5519		0.5226	0.5315	0.5234		0.5291	0.5535	0.5128
-5.01	0.4974	0.5096	0.4371		0.5438	0.4632	0.486		0.534	0.5641	0.5804		-5.01	0.5348	0.5267	0.582		0.5462	0.4974	0.5527		0.5226	0.5315	0.5234		0.5299	0.5527	0.5088
-5	0.4974	0.5096	0.4371		0.5438	0.4648	0.486		0.534	0.5641	0.5812		-5	0.5356	0.5267	0.5828		0.547	0.4974	0.5527		0.5226	0.5307	0.5234		0.5291	0.5495	0.5088
-4.99	0.4982	0.5112	0.4371		0.5429	0.4656	0.486		0.534	0.5641	0.5812		-4.99	0.5364	0.5275	0.582		0.547	0.4957	0.5527		0.5226	0.5307	0.5234		0.5299	0.5495	0.5063
-4.98	0.4982	0.512	0.4371		0.5421	0.4656	0.486		0.534	0.5641	0.582		-4.98	0.5372	0.5267	0.582		0.547	0.4949	0.5519		0.5226	0.5307	0.5226		0.5299	0.5486	0.5071
-4.97	0.4974	0.5128	0.4363		0.5421	0.4648	0.486		0.5348	0.5641	0.5828		-4.97	0.5364	0.5267	0.5812		0.547	0.4949	0.5519		0.5226	0.5315	0.5226		0.5307	0.5511	0.5079
-4.96	0.4974	0.5128	0.4355		0.5421	0.464	0.486		0.5364	0.5649	0.5836		-4.96	0.5364	0.5267	0.582		0.5462	0.4949	0.5519		0.5226	0.5332	0.5218		0.5299	0.5511	0.5104
-4.95	0.4982	0.512	0.4347		0.5421	0.4632	0.486		0.5372	0.5641	0.5836		-4.95	0.5364	0.5275	0.5828		0.5454	0.4941	0.5519		0.5234	0.5332	0.5218		0.5291	0.5535	0.5096
-4.94	0.4998	0.5112	0.4347		0.5421	0.4632	0.486		0.5364	0.5641	0.5836		-4.94	0.5381	0.5275	0.5836		0.5454	0.4917	0.5519		0.5242	0.5332	0.5218		0.5283	0.5535	0.5128
-4.93	0.4998	0.5104	0.4347		0.5421	0.4624	0.486		0.5356	0.5641	0.5828		-4.93	0.5381	0.5275	0.5836		0.5462	0.4925	0.5519		0.525	0.5324	0.5226		0.5283	0.5535	0.5128
-4.92	0.499	0.5104	0.4347		0.5421	0.4632	0.486		0.5348	0.5649	0.582		-4.92	0.5381	0.5275	0.5836		0.5454	0.4925	0.5519		0.5242	0.5324	0.5226		0.5291	0.5527	0.5136
-4.91	0.4982	0.5104	0.4347		0.5429	0.4624	0.486		0.5332	0.5649	0.5812		-4.91	0.5372	0.5267	0.5836		0.5454	0.4949	0.5511		0.5234	0.5324	0.5234		0.5299	0.5535	0.5104
-4.9	0.4974	0.5104	0.4347		0.5438	0.4624	0.486		0.5324	0.5641	0.5796		-4.9	0.5364	0.5258	0.5836		0.5454	0.4941	0.5511		0.5226	0.5315	0.5234		0.5299	0.5535	0.5104
-4.89	0.4965	0.5104	0.4355		0.5446	0.4624	0.486		0.5315	0.5649	0.5796		-4.89	0.5356	0.5258	0.5836		0.5462	0.4925	0.5519		0.5218	0.5315	0.5234		0.5291	0.5535	0.5136
-4.88	0.4957	0.5104	0.4363		0.5446	0.4632	0.486		0.5332	0.5657	0.5796		-4.88	0.5356	0.5267	0.5836		0.5478	0.4933	0.5527		0.5218	0.5315	0.5234		0.5291	0.5535	0.5136
-4.87	0.4965	0.5104	0.4371		0.5446	0.464	0.486		0.534	0.5674	0.5812		-4.87	0.5364	0.5275	0.5828		0.5486	0.4941	0.5527		0.5218	0.5324	0.5242		0.5291	0.5535	0.5136
-4.86	0.4965	0.5096	0.4363		0.5446	0.4648	0.486		0.5332	0.5674	0.5812		-4.86	0.5372	0.5275	0.5828		0.5503	0.4965	0.5527		0.5226	0.5324	0.525		0.5307	0.5527	0.5104
-4.85	0.4974	0.5104	0.4355		0.5446	0.4656	0.486		0.5332	0.5665	0.5796		-4.85	0.5372	0.5275	0.582		0.5478	0.4949	0.5535		0.5226	0.5324	0.5242		0.5307	0.5535	0.5104
-4.84	0.4965	0.5104	0.4347		0.5438	0.4664	0.486		0.5332	0.5657	0.5796		-4.84	0.5356	0.5275	0.5828		0.5462	0.4941	0.5535		0.5226	0.5324	0.5234		0.5307	0.5535	0.5128
-4.83	0.4965	0.5112	0.4347		0.5429	0.4664	0.486		0.5348	0.5649	0.5796		-4.83	0.5356	0.5275	0.5828		0.5454	0.4933	0.5527		0.5226	0.5324	0.5226		0.5299	0.5535	0.5128
-4.82	0.4965	0.5104	0.4347		0.5421	0.4656	0.486		0.5348	0.5641	0.5812		-4.82	0.5356	0.5275	0.5828		0.5462	0.4933	0.5519		0.5226	0.5315	0.5226		0.5299	0.5519	0.5128
-4.81	0.4974	0.5112	0.4347		0.5429	0.4648	0.486		0.5348	0.5633	0.5812		-4.81	0.5372	0.5275	0.5828		0.547	0.4933	0.5519		0.5226	0.5315	0.5218		0.5299	0.5519	0.5104
-4.8	0.4982	0.5112	0.4347		0.5438	0.4632	0.486		0.5356	0.5633	0.5788		-4.8	0.5372	0.5275	0.5828		0.547	0.4933	0.5519		0.5226	0.5315	0.5218		0.5299	0.5503	0.5104
-4.79	0.4982	0.5112	0.4347		0.5438	0.4632	0.4868		0.5356	0.5641	0.5788		-4.79	0.5372	0.5283	0.5836		0.5462	0.4925	0.5519		0.5226	0.5324	0.521		0.5291	0.5511	0.5096
-4.78	0.4982	0.5104	0.4339		0.5429	0.4624	0.4868		0.5348	0.5649	0.5779		-4.78	0.5372	0.5283	0.5836		0.5462	0.4933	0.5519		0.5226	0.5324	0.521		0.5291	0.5519	0.5088
-4.77	0.4982	0.5104	0.433		0.5421	0.4632	0.4868		0.534	0.5641	0.5804		-4.77	0.5381	0.5283	0.5828		0.5462	0.4933	0.5519		0.5218	0.5324	0.521		0.5291	0.5551	0.5088
-4.76	0.4982	0.5104	0.433		0.5421	0.4632	0.486		0.5324	0.5641	0.5796		-4.76	0.5372	0.5275	0.582		0.547	0.4949	0.5519		0.5218	0.5324	0.5218		0.5299	0.5551	0.5104
-4.75	0.4974	0.5104	0.4339		0.5429	0.4632	0.486		0.5332	0.5633	0.5779		-4.75	0.5364	0.5275	0.582		0.547	0.4941	0.5519		0.5226	0.5315	0.5234		0.5291	0.5543	0.5112
-4.74	0.4965	0.5104	0.4347		0.5438	0.4624	0.486		0.5332	0.5649	0.5779		-4.74	0.5348	0.5275	0.582		0.5462	0.4949	0.5527		0.5234	0.5315	0.5242		0.5291	0.5535	0.5112
-4.73	0.4949	0.5104	0.4347		0.5438	0.4624	0.486		0.5348	0.5665	0.5779		-4.73	0.5356	0.5275	0.582		0.5454	0.4949	0.5527		0.5234	0.5315	0.5234		0.5291	0.5527	0.5104
-4.72	0.4949	0.5104	0.4339		0.5429	0.4632	0.486		0.5348	0.5674	0.5804		-4.72	0.5372	0.5275	0.5812		0.5446	0.4949	0.5535		0.5218	0.5324	0.5218		0.5299	0.5527	0.5104
-4.71	0.4949	0.5104	0.4339		0.5429	0.4648	0.486		0.5332	0.5665	0.5804		-4.71	0.5372	0.5275	0.582		0.5446	0.4941	0.5535		0.5218	0.5324	0.5218		0.5315	0.5519	0.5104
-4.7	0.4957	0.5112	0.4339		0.5446	0.4656	0.486		0.5332	0.5649	0.5779		-4.7	0.5364	0.5275	0.5828		0.5454	0.4941	0.5543		0.5218	0.5324	0.5226		0.5324	0.5519	0.5096
-4.69	0.4965	0.512	0.4347		0.5462	0.4648	0.486		0.5324	0.5649	0.5779		-4.69	0.5348	0.5267	0.5828		0.5454	0.4941	0.5535		0.5226	0.5324	0.5234		0.5332	0.5519	0.5096
-4.68	0.4965	0.512	0.4347		0.5462	0.464	0.4868		0.534	0.5649	0.5779		-4.68	0.5348	0.5267	0.582		0.5454	0.4941	0.5527		0.5226	0.5315	0.5218		0.5315	0.5519	0.5096
-4.67	0.4974	0.5112	0.4347		0.5454	0.464	0.4868		0.5332	0.5649	0.5804		-4.67	0.5348	0.5267	0.5812		0.5446	0.4941	0.5519		0.5226	0.5324	0.521		0.5307	0.5519	0.5104
-4.66	0.4982	0.5071	0.4347		0.5446	0.464	0.4868		0.5332	0.5641	0.5804		-4.66	0.5356	0.5283	0.582		0.5446	0.4949	0.5527		0.5234	0.5332	0.5201		0.5299	0.5519	0.5112
-4.65	0.499	0.5055	0.4347		0.5438	0.464	0.486		0.5332	0.5641	0.5763		-4.65	0.5364	0.5291	0.5828		0.5446	0.4949	0.5535		0.5242	0.534	0.521		0.5291	0.5527	0.5128
-4.64	0.4998	0.5055	0.4347		0.5429	0.4624	0.486		0.534	0.5641	0.5771		-4.64	0.5364	0.5307	0.5836		0.5454	0.4949	0.5543		0.525	0.5332	0.521		0.5291	0.5527	0.5136
-4.63	0.499	0.5088	0.4347		0.5421	0.4632	0.486		0.5348	0.5641	0.5771		-4.63	0.5364	0.5307	0.5836		0.5454	0.4949	0.5535		0.525	0.5332	0.521		0.5291	0.5527	0.5128
-4.62	0.499	0.5104	0.4347		0.5421	0.4624	0.486		0.5348	0.5641	0.5812		-4.62	0.5372	0.5299	0.5836		0.5454	0.4957	0.5527		0.525	0.5332	0.521		0.5291	0.5527	0.5112
-4.61	0.499	0.5104	0.4347		0.5421	0.4632	0.486		0.534	0.5633	0.5804		-4.61	0.5389	0.5291	0.5828		0.5446	0.4957	0.5519		0.5242	0.5332	0.5218		0.5291	0.5527	0.5104
-4.6	0.4982	0.5096	0.4347		0.5421	0.4624	0.486		0.534	0.5641	0.5771		-4.6	0.5389	0.5283	0.582		0.5446	0.4949	0.5519		0.5234	0.5324	0.5226		0.5283	0.5535	0.5104
-4.59	0.4974	0.5104	0.4347		0.5421	0.4624	0.486		0.534	0.5649	0.5771		-4.59	0.5372	0.5283	0.582		0.5446	0.4949	0.5519		0.5226	0.5315	0.5218		0.5291	0.5527	0.5104
-4.58	0.4965	0.5104	0.4347		0.5413	0.4624	0.4868		0.5348	0.5657	0.5779		-4.58	0.5364	0.5275	0.582		0.5446	0.4949	0.5527		0.5226	0.5307	0.521		0.5291	0.5527	0.5104
-4.57	0.4965	0.5112	0.4355		0.5413	0.4632	0.4884		0.534	0.5649	0.5812		-4.57	0.5364	0.5275	0.5812		0.5446	0.4949	0.5535		0.5226	0.5307	0.5201		0.5307	0.5519	0.5104
-4.56	0.4974	0.5104	0.4355		0.5421	0.464	0.4892		0.534	0.5641	0.5812		-4.56	0.5372	0.5275	0.5812		0.5454	0.4941	0.5543		0.5234	0.5307	0.5218		0.5315	0.5519	0.5096
-4.55	0.4965	0.5112	0.4355		0.5438	0.4632	0.4892		0.534	0.5633	0.5771		-4.55	0.5364	0.5267	0.5804		0.547	0.4933	0.5551		0.5234	0.5315	0.5218		0.5324	0.5495	0.5096
-4.54	0.4965	0.5112	0.4347		0.5446	0.4624	0.4876		0.5348	0.5633	0.5771		-4.54	0.5356	0.5267	0.582		0.547	0.4933	0.5543		0.5242	0.5315	0.5218		0.5315	0.5495	0.5088
-4.53	0.4965	0.5112	0.4355		0.5446	0.4615	0.4868		0.5348	0.5641	0.5771		-4.53	0.5356	0.5258	0.5812		0.5462	0.4933	0.5543		0.5234	0.5324	0.5201		0.5299	0.5495	0.5096
-4.52	0.4974	0.5104	0.4355		0.5438	0.4624	0.486		0.5356	0.5649	0.5804		-4.52	0.5364	0.5267	0.582		0.5446	0.4933	0.5535		0.5234	0.5324	0.5201		0.5291	0.5519	0.5096
-4.51	0.499	0.5104	0.4355		0.5438	0.4624	0.486		0.5348	0.5649	0.5796		-4.51	0.5364	0.5267	0.582		0.5454	0.4933	0.5543		0.5234	0.5324	0.5201		0.5283	0.5519	0.5112
-4.5	0.499	0.5104	0.4347		0.5438	0.4632	0.486		0.5348	0.5649	0.5763		-4.5	0.5364	0.5283	0.582		0.5462	0.4941	0.5535		0.5242	0.5324	0.521		0.5291	0.5495	0.512
-4.49	0.499	0.5112	0.4347		0.5438	0.4632	0.486		0.534	0.5649	0.5779		-4.49	0.5364	0.5299	0.582		0.547	0.4941	0.5535		0.525	0.5324	0.5218		0.5291	0.5495	0.5128
-4.48	0.4982	0.512	0.4355		0.5429	0.464	0.486		0.5348	0.5649	0.5788		-4.48	0.5372	0.5315	0.582		0.547	0.4941	0.5527		0.525	0.5324	0.5226		0.5299	0.5503	0.512
-4.47	0.4974	0.512	0.4355		0.5421	0.4632	0.4868		0.5348	0.5641	0.582		-4.47	0.5381	0.5315	0.582		0.547	0.4941	0.5527		0.5242	0.5315	0.5234		0.5291	0.5527	0.5112
-4.46	0.4965	0.5112	0.4355		0.5421	0.4624	0.4868		0.5348	0.5641	0.5812		-4.46	0.5389	0.5307	0.582		0.547	0.4941	0.5527		0.5234	0.5315	0.5242		0.5291	0.5519	0.5104
-4.45	0.4957	0.5104	0.4347		0.5421	0.4615	0.4868		0.5348	0.5649	0.5812		-4.45	0.5389	0.5299	0.5812		0.5478	0.4949	0.5535		0.5226	0.5307	0.5242		0.5291	0.5495	0.5104
-4.44	0.4957	0.5104	0.4347		0.5421	0.4624	0.4868		0.5348	0.5649	0.5812		-4.44	0.5372	0.5291	0.5812		0.5486	0.4949	0.5535		0.5234	0.5307	0.5226		0.5299	0.5495	0.5096
-4.43	0.4965	0.5104	0.4347		0.5421	0.4632	0.4876		0.5348	0.5649	0.5812		-4.43	0.5372	0.5283	0.5812		0.5495	0.4965	0.5527		0.5234	0.5299	0.521		0.5299	0.5495	0.5096
-4.42	0.4965	0.5104	0.4339		0.5429	0.464	0.4892		0.5356	0.5641	0.5812		-4.42	0.5372	0.5275	0.5812		0.5486	0.4965	0.5519		0.5234	0.5299	0.521		0.5299	0.5503	0.5088
-4.41	0.4965	0.5112	0.4339		0.5438	0.464	0.4892		0.5356	0.5633	0.5812		-4.41	0.5381	0.5275	0.582		0.5478	0.4965	0.5527		0.5234	0.5299	0.5226		0.5299	0.5503	0.5088
-4.4	0.4957	0.512	0.4339		0.5454	0.4632	0.4892		0.5356	0.5625	0.5812		-4.4	0.5372	0.5267	0.5828		0.547	0.4957	0.5535		0.5242	0.5299	0.5226		0.5299	0.5527	0.5088
-4.39	0.4957	0.512	0.4355		0.5462	0.4624	0.4884		0.5348	0.5625	0.5812		-4.39	0.5372	0.5267	0.5828		0.547	0.4949	0.5535		0.5242	0.5307	0.5226		0.5291	0.5535	0.5088
-4.38	0.4965	0.5112	0.4355		0.5462	0.4615	0.4884		0.5348	0.5641	0.582		-4.38	0.5372	0.5267	0.5828		0.547	0.4957	0.5527		0.5242	0.5307	0.5218		0.5291	0.5535	0.5088
-4.37	0.4965	0.5112	0.4355		0.5454	0.4615	0.4876		0.5356	0.5649	0.5828		-4.37	0.5372	0.5275	0.5828		0.547	0.4957	0.5519		0.5242	0.5307	0.5226		0.5291	0.5519	0.5088
-4.36	0.4965	0.512	0.4347		0.5446	0.4615	0.4868		0.5356	0.5649	0.5828		-4.36	0.5372	0.5275	0.5836		0.5462	0.4957	0.5519		0.525	0.5299	0.5218		0.5291	0.5519	0.5104
-4.35	0.4957	0.512	0.4355		0.5446	0.4624	0.486		0.5356	0.5641	0.5828		-4.35	0.5364	0.5283	0.5836		0.5454	0.4941	0.5519		0.5242	0.5307	0.5218		0.5283	0.5527	0.5104
-4.34	0.4957	0.5112	0.4355		0.5446	0.4624	0.486		0.5356	0.5641	0.5828		-4.34	0.5356	0.5291	0.5836		0.5446	0.4933	0.5519		0.5242	0.5315	0.521		0.5283	0.5535	0.5096
-4.33	0.4957	0.5104	0.4363		0.5438	0.4632	0.486		0.5364	0.5649	0.5828		-4.33	0.5364	0.5299	0.5828		0.5454	0.4941	0.5519		0.5242	0.5315	0.5218		0.5283	0.5535	0.5104
-4.32	0.4957	0.5104	0.4355		0.5429	0.4632	0.4868		0.5372	0.5657	0.5828		-4.32	0.5381	0.5299	0.5812		0.5454	0.4949	0.5519		0.5242	0.5307	0.5218		0.5291	0.5519	0.5112
-4.31	0.4957	0.5104	0.4355		0.5421	0.464	0.4876		0.5364	0.5657	0.582		-4.31	0.5389	0.5283	0.5804		0.5462	0.4949	0.5519		0.5234	0.5299	0.5226		0.5291	0.5511	0.512
-4.3	0.4957	0.5096	0.4347		0.5421	0.464	0.4876		0.5348	0.5657	0.582		-4.3	0.5381	0.5275	0.5796		0.547	0.4941	0.5519		0.5226	0.5299	0.5226		0.5299	0.5495	0.5104
-4.29	0.4957	0.5096	0.4355		0.5421	0.464	0.4876		0.5332	0.5649	0.5812		-4.29	0.5372	0.5258	0.5812		0.5486	0.4941	0.5519		0.5226	0.5299	0.5218		0.5291	0.5503	0.5096
-4.28	0.4957	0.5096	0.4355		0.5421	0.464	0.4884		0.5324	0.5649	0.5812		-4.28	0.5364	0.5267	0.5812		0.5503	0.4957	0.5519		0.5226	0.5307	0.5218		0.5291	0.5503	0.5104
-4.27	0.4965	0.5104	0.4347		0.5429	0.464	0.49		0.5332	0.5641	0.5812		-4.27	0.5364	0.5267	0.582		0.5495	0.4965	0.5519		0.5218	0.5307	0.5226		0.5283	0.5519	0.5104
-4.26	0.4974	0.5104	0.433		0.5429	0.4648	0.49		0.534	0.5641	0.5804		-4.26	0.5364	0.5275	0.582		0.5486	0.4965	0.5519		0.5218	0.5315	0.5234		0.5291	0.5519	0.5112
-4.25	0.4974	0.5112	0.433		0.5446	0.4656	0.4892		0.534	0.5641	0.5804		-4.25	0.5372	0.5275	0.5828		0.5462	0.4957	0.5519		0.5226	0.5315	0.5234		0.5291	0.5535	0.5112
-4.24	0.4965	0.5128	0.4339		0.5454	0.4656	0.4876		0.5332	0.5641	0.5812		-4.24	0.5372	0.5267	0.5836		0.5462	0.4957	0.5519		0.5234	0.5324	0.5218		0.5307	0.5543	0.5112
-4.23	0.4957	0.5144	0.4347		0.5454	0.4648	0.4868		0.5332	0.5649	0.5828		-4.23	0.5372	0.5267	0.5828		0.5454	0.4965	0.5519		0.5234	0.5324	0.5218		0.5299	0.5543	0.5112
-4.22	0.4957	0.5144	0.4347		0.5438	0.464	0.4868		0.5348	0.5649	0.5836		-4.22	0.5372	0.5258	0.5828		0.5454	0.4965	0.5527		0.5226	0.5332	0.521		0.5291	0.5527	0.5104
-4.21	0.4957	0.5136	0.4347		0.5421	0.464	0.4876		0.5364	0.5649	0.5836		-4.21	0.5372	0.5275	0.5828		0.5446	0.4957	0.5527		0.5234	0.5332	0.5226		0.5275	0.5519	0.5104
-4.2	0.4957	0.5128	0.4347		0.5413	0.464	0.4876		0.5364	0.5649	0.5836		-4.2	0.5372	0.5275	0.5836		0.5446	0.4949	0.5527		0.5234	0.5332	0.5226		0.5283	0.5527	0.5104
-4.19	0.4957	0.5128	0.4339		0.5405	0.464	0.4868		0.5356	0.5649	0.5836		-4.19	0.5372	0.5283	0.5828		0.5446	0.4949	0.5527		0.5234	0.5332	0.5234		0.5291	0.5535	0.5104
-4.18	0.4957	0.5128	0.4339		0.5405	0.464	0.486		0.5356	0.5649	0.5836		-4.18	0.5372	0.5275	0.582		0.5446	0.4965	0.5527		0.5226	0.5332	0.5226		0.5291	0.5543	0.5096
-4.17	0.4957	0.512	0.4339		0.5413	0.4632	0.486		0.5356	0.5641	0.5828		-4.17	0.5372	0.5275	0.582		0.5454	0.4957	0.5535		0.5226	0.5324	0.5218		0.5291	0.5527	0.5096
-4.16	0.4965	0.5112	0.4347		0.5421	0.4632	0.486		0.5356	0.5649	0.582		-4.16	0.5372	0.5283	0.5828		0.5462	0.4957	0.5535		0.5226	0.5307	0.521		0.5291	0.5519	0.5096
-4.15	0.4974	0.5104	0.4347		0.5429	0.4632	0.486		0.5348	0.5649	0.5812		-4.15	0.5381	0.5283	0.582		0.5462	0.4949	0.5535		0.5234	0.5307	0.5201		0.5299	0.5495	0.5104
-4.14	0.4974	0.5112	0.4347		0.5429	0.4648	0.4868		0.5348	0.5649	0.5812		-4.14	0.5372	0.5283	0.5812		0.5454	0.4957	0.5527		0.5242	0.5307	0.5201		0.5299	0.5503	0.5104
-4.13	0.4965	0.5112	0.4347		0.5429	0.4648	0.4884		0.5348	0.5641	0.5812		-4.13	0.5372	0.5275	0.5804		0.5462	0.4965	0.5527		0.5242	0.5315	0.521		0.5299	0.5503	0.5104
-4.12	0.4965	0.5112	0.4347		0.5429	0.4648	0.49		0.5348	0.5641	0.5812		-4.12	0.5364	0.5275	0.582		0.5478	0.4974	0.5535		0.5234	0.5315	0.5218		0.5299	0.5519	0.5104
-4.11	0.4974	0.5104	0.4355		0.5429	0.4648	0.49		0.5348	0.5649	0.5812		-4.11	0.5372	0.5267	0.582		0.5486	0.4974	0.5535		0.5234	0.5324	0.5234		0.5299	0.5519	0.5096
-4.1	0.4982	0.5112	0.4363		0.5429	0.4656	0.4892		0.5348	0.5649	0.5812		-4.1	0.5364	0.5267	0.5828		0.547	0.4965	0.5527		0.5234	0.5315	0.5234		0.5299	0.5527	0.5096
-4.09	0.4982	0.512	0.4363		0.5421	0.4656	0.4876		0.5348	0.5649	0.582		-4.09	0.5356	0.5267	0.5828		0.5454	0.4965	0.5527		0.5234	0.5315	0.5234		0.5299	0.5527	0.5096
-4.08	0.4974	0.5136	0.4355		0.5421	0.4648	0.4876		0.5356	0.5641	0.5828		-4.08	0.5348	0.5275	0.5836		0.5438	0.4965	0.5535		0.5226	0.5315	0.5218		0.5307	0.5527	0.5104
-4.07	0.4965	0.5136	0.4347		0.5421	0.464	0.4876		0.5364	0.5641	0.5836		-4.07	0.5356	0.5275	0.5836		0.5446	0.4965	0.5551		0.5226	0.5315	0.521		0.5307	0.5519	0.5104
-4.06	0.4957	0.5136	0.4347		0.5421	0.4632	0.4876		0.5381	0.5641	0.5828		-4.06	0.5364	0.5275	0.5836		0.5454	0.4957	0.556		0.5234	0.5315	0.521		0.5307	0.5519	0.5096
-4.05	0.4957	0.5104	0.4347		0.5421	0.4632	0.4868		0.5381	0.5641	0.5812		-4.05	0.5372	0.5283	0.5836		0.547	0.4957	0.5551		0.5234	0.5315	0.5218		0.5299	0.5519	0.5096
-4.04	0.4965	0.5096	0.4347		0.5413	0.4624	0.486		0.5381	0.5641	0.5804		-4.04	0.5381	0.5299	0.5828		0.5462	0.4957	0.5543		0.5234	0.5315	0.5218		0.5299	0.5519	0.5096
-4.03	0.4974	0.5088	0.4347		0.5413	0.4632	0.486		0.5381	0.5641	0.5796		-4.03	0.5381	0.5307	0.5828		0.5446	0.4949	0.5527		0.5234	0.5307	0.5218		0.5299	0.5519	0.5096
-4.02	0.4982	0.5104	0.4347		0.5405	0.4632	0.4868		0.5381	0.5641	0.5804		-4.02	0.5381	0.5307	0.5828		0.5438	0.4941	0.5527		0.5226	0.5307	0.5218		0.5299	0.5527	0.5096
-4.01	0.4982	0.5104	0.4347		0.5413	0.464	0.4868		0.5372	0.5649	0.5804		-4.01	0.5381	0.5299	0.5836		0.5446	0.4933	0.5519		0.5226	0.5315	0.5226		0.5299	0.5535	0.5104
-4	0.4982	0.5104	0.4363		0.5413	0.464	0.4868		0.5356	0.5649	0.5812		-4	0.5381	0.5299	0.5828		0.5454	0.4933	0.5527		0.5226	0.5324	0.5226		0.5299	0.5551	0.5112
-3.99	0.4974	0.5104	0.4379		0.5421	0.464	0.486		0.5348	0.5649	0.5804		-3.99	0.5381	0.5283	0.5828		0.5454	0.4949	0.5527		0.5242	0.5324	0.5226		0.5299	0.5543	0.512
-3.98	0.4965	0.5104	0.4396		0.5421	0.464	0.486		0.5348	0.5641	0.5804		-3.98	0.5372	0.5275	0.582		0.5454	0.4957	0.5527		0.525	0.5324	0.5218		0.5291	0.5535	0.5112
-3.97	0.4957	0.5104	0.4387		0.5413	0.464	0.486		0.5348	0.5641	0.5804		-3.97	0.5372	0.5267	0.5812		0.5462	0.4974	0.5527		0.5242	0.5324	0.521		0.5291	0.5519	0.5112
-3.96	0.4965	0.5104	0.4379		0.5421	0.464	0.4851		0.5348	0.5641	0.5812		-3.96	0.5364	0.5275	0.5804		0.5462	0.4965	0.5535		0.5234	0.5332	0.5218		0.5299	0.5519	0.5096
-3.95	0.4974	0.5112	0.4371		0.5421	0.464	0.4843		0.5348	0.5649	0.5812		-3.95	0.5364	0.5275	0.5804		0.5454	0.4957	0.5551		0.5226	0.5332	0.5218		0.5315	0.5527	0.5088
-3.94	0.4982	0.512	0.4371		0.5429	0.464	0.4843		0.534	0.5649	0.582		-3.94	0.5364	0.5283	0.5812		0.5454	0.4941	0.5551		0.5226	0.5332	0.5218		0.5315	0.5527	0.5088
-3.93	0.4982	0.512	0.4363		0.5421	0.464	0.4851		0.534	0.5657	0.5812		-3.93	0.5372	0.5283	0.5812		0.5454	0.4933	0.5551		0.5226	0.5315	0.521		0.5307	0.5527	0.5096
-3.92	0.4982	0.5112	0.4355		0.5421	0.464	0.486		0.534	0.5649	0.582		-3.92	0.5372	0.5291	0.582		0.5454	0.4941	0.5543		0.5226	0.5307	0.521		0.5299	0.5519	0.5104
-3.91	0.499	0.5104	0.4347		0.5429	0.464	0.486		0.5356	0.5649	0.582		-3.91	0.5372	0.5283	0.582		0.5446	0.4949	0.5535		0.5234	0.5315	0.521		0.5299	0.5519	0.5104
-3.9	0.4998	0.5104	0.4347		0.5438	0.4632	0.486		0.5356	0.5649	0.5828		-3.9	0.5372	0.5283	0.582		0.5446	0.4949	0.5527		0.5242	0.5324	0.521		0.5299	0.5527	0.5104
-3.89	0.4998	0.5104	0.4347		0.5429	0.4624	0.4868		0.5364	0.5657	0.582		-3.89	0.5372	0.5291	0.582		0.5446	0.4949	0.5527		0.525	0.534	0.521		0.5299	0.5535	0.5112
-3.88	0.499	0.5104	0.4347		0.5421	0.4615	0.4868		0.5356	0.5665	0.5804		-3.88	0.5381	0.5299	0.5828		0.5462	0.4941	0.5527		0.525	0.5332	0.521		0.5299	0.5543	0.5112
-3.87	0.4982	0.5104	0.4347		0.5421	0.4615	0.4868		0.5356	0.5657	0.5804		-3.87	0.5389	0.5307	0.582		0.547	0.4949	0.5527		0.525	0.5324	0.521		0.5299	0.5543	0.5112
-3.86	0.4982	0.5112	0.4347		0.5438	0.4615	0.486		0.534	0.5649	0.5804		-3.86	0.5381	0.5299	0.5812		0.5478	0.4949	0.5527		0.525	0.5307	0.5218		0.5299	0.5535	0.5104
-3.85	0.499	0.5112	0.4355		0.5438	0.4624	0.4868		0.5348	0.5649	0.5812		-3.85	0.5364	0.5299	0.5804		0.547	0.4957	0.5535		0.525	0.5299	0.5226		0.5299	0.5543	0.5096
-3.84	0.4998	0.5112	0.4371		0.5429	0.4624	0.4868		0.5348	0.5665	0.5812		-3.84	0.5364	0.5291	0.582		0.5462	0.4949	0.5535		0.525	0.5307	0.5226		0.5299	0.5535	0.5096
-3.83	0.4998	0.5104	0.4379		0.5421	0.4632	0.4876		0.5356	0.5674	0.5812		-3.83	0.5381	0.5283	0.582		0.5454	0.4941	0.5535		0.5242	0.5315	0.5234		0.5299	0.5535	0.5096
-3.82	0.4982	0.5104	0.4379		0.5421	0.4632	0.4868		0.5348	0.5674	0.582		-3.82	0.5389	0.5275	0.5828		0.5454	0.4933	0.5543		0.5234	0.5324	0.5242		0.5307	0.5519	0.5104
-3.81	0.4974	0.5104	0.4363		0.5429	0.4648	0.4868		0.5348	0.5665	0.582		-3.81	0.5381	0.5275	0.5828		0.5462	0.4941	0.556		0.5226	0.5324	0.5242		0.5315	0.5519	0.5104
-3.8	0.4974	0.5104	0.4355		0.5429	0.4648	0.486		0.5348	0.5665	0.582		-3.8	0.5372	0.5283	0.5836		0.547	0.4949	0.5568		0.5226	0.5315	0.5234		0.5315	0.5527	0.5104
-3.79	0.4982	0.5104	0.4347		0.5429	0.4648	0.4868		0.5348	0.5665	0.582		-3.79	0.5372	0.5283	0.5836		0.547	0.4957	0.5551		0.5234	0.5315	0.5226		0.5307	0.5527	0.5104
-3.78	0.4982	0.5104	0.4347		0.5429	0.464	0.4876		0.5356	0.5657	0.582		-3.78	0.5372	0.5283	0.5828		0.5462	0.4957	0.5535		0.5242	0.5324	0.5226		0.5307	0.5527	0.5104
-3.77	0.499	0.5104	0.4347		0.5438	0.4632	0.4876		0.5364	0.5649	0.582		-3.77	0.5372	0.5275	0.5828		0.5454	0.4949	0.5519		0.5242	0.534	0.5226		0.5307	0.5519	0.5104
-3.76	0.4998	0.5096	0.4347		0.5438	0.4624	0.4876		0.5356	0.5641	0.5804		-3.76	0.5372	0.5275	0.5828		0.5454	0.4941	0.5527		0.5242	0.534	0.5218		0.5299	0.5519	0.512
-3.75	0.5006	0.5096	0.4347		0.5429	0.4615	0.4868		0.5348	0.5641	0.5796		-3.75	0.5372	0.5283	0.5836		0.5462	0.4933	0.5527		0.5242	0.5324	0.521		0.5291	0.5527	0.5112
-3.74	0.4998	0.5088	0.4347		0.5421	0.4624	0.4868		0.534	0.5641	0.5796		-3.74	0.5372	0.5291	0.5828		0.547	0.4933	0.5535		0.525	0.5307	0.521		0.5283	0.5535	0.5112
-3.73	0.499	0.5096	0.4347		0.5421	0.4632	0.4868		0.534	0.5641	0.5796		-3.73	0.5372	0.5299	0.5828		0.547	0.4941	0.5527		0.525	0.5299	0.5218		0.5291	0.5543	0.5112
-3.72	0.4982	0.5096	0.4339		0.5421	0.464	0.4876		0.5332	0.5641	0.5804		-3.72	0.5364	0.5291	0.5828		0.547	0.4949	0.5527		0.5242	0.5299	0.5226		0.5283	0.5543	0.5128
-3.71	0.4974	0.5104	0.4339		0.5421	0.464	0.4884		0.5332	0.5641	0.5804		-3.71	0.5372	0.5291	0.5836		0.547	0.4949	0.5527		0.5242	0.5299	0.5234		0.5283	0.5543	0.5136
-3.7	0.4974	0.5104	0.4339		0.5421	0.464	0.4884		0.534	0.5641	0.5812		-3.7	0.5372	0.5291	0.5836		0.5462	0.4949	0.5527		0.5242	0.5307	0.5242		0.5275	0.5543	0.5112
-3.69	0.4965	0.5104	0.4347		0.5429	0.464	0.4876		0.534	0.5657	0.582		-3.69	0.5381	0.5291	0.5828		0.5462	0.4949	0.5527		0.5242	0.5315	0.525		0.5275	0.5535	0.5104
-3.68	0.4965	0.5112	0.4347		0.5429	0.464	0.4876		0.534	0.5657	0.582		-3.68	0.5381	0.5283	0.582		0.5462	0.4949	0.5519		0.5234	0.5324	0.5242		0.5283	0.5527	0.5088
-3.67	0.4957	0.5112	0.4347		0.5438	0.4648	0.4884		0.5332	0.5657	0.582		-3.67	0.5381	0.5275	0.5812		0.547	0.4941	0.5527		0.5234	0.5315	0.5234		0.5283	0.5519	0.5088
-3.66	0.4957	0.5112	0.4347		0.5446	0.464	0.4892		0.534	0.5641	0.5812		-3.66	0.5381	0.5275	0.5812		0.547	0.4941	0.5535		0.5234	0.5307	0.5226		0.5283	0.5519	0.5079
-3.65	0.4965	0.5104	0.4339		0.5454	0.4632	0.4892		0.5348	0.5641	0.582		-3.65	0.5372	0.5275	0.5812		0.547	0.4949	0.5543		0.5234	0.5307	0.5226		0.5283	0.5511	0.5088
-3.64	0.4965	0.5104	0.4339		0.5454	0.4624	0.4884		0.5356	0.5633	0.582		-3.64	0.5372	0.5275	0.582		0.5462	0.4957	0.5535		0.5226	0.5324	0.5226		0.5283	0.5511	0.5088
-3.63	0.4974	0.5096	0.433		0.5446	0.4624	0.4884		0.5356	0.5641	0.582		-3.63	0.5372	0.5275	0.5828		0.5454	0.4957	0.5527		0.5226	0.534	0.5226		0.5291	0.5511	0.5096
-3.62	0.4982	0.5096	0.4339		0.5446	0.4632	0.4876		0.534	0.5633	0.5804		-3.62	0.5372	0.5267	0.582		0.5446	0.4957	0.5511		0.5226	0.5348	0.5226		0.5291	0.5519	0.5104
-3.61	0.4998	0.5096	0.4339		0.5446	0.4624	0.4868		0.534	0.5641	0.5804		-3.61	0.5364	0.5275	0.582		0.5446	0.4949	0.5519		0.5226	0.534	0.5218		0.5299	0.5519	0.512
-3.6	0.5014	0.5088	0.4347		0.5438	0.4632	0.4868		0.534	0.5633	0.5812		-3.6	0.5356	0.5283	0.582		0.5454	0.4941	0.5519		0.5226	0.5332	0.521		0.5299	0.5486	0.5128
-3.59	0.5006	0.5088	0.4347		0.5429	0.4632	0.4876		0.5348	0.5641	0.5828		-3.59	0.5356	0.5291	0.5836		0.547	0.4941	0.5535		0.5226	0.5315	0.521		0.5299	0.5486	0.5128
-3.58	0.4998	0.5088	0.4347		0.5429	0.464	0.4876		0.5348	0.5641	0.5828		-3.58	0.5372	0.5283	0.5836		0.5478	0.4949	0.5527		0.5226	0.5307	0.5218		0.5299	0.5486	0.5136
-3.57	0.4974	0.5104	0.4347		0.5429	0.4632	0.4868		0.5356	0.5641	0.582		-3.57	0.5389	0.5275	0.5836		0.547	0.4949	0.5527		0.5218	0.5307	0.5226		0.5299	0.5519	0.5128
-3.56	0.4965	0.5104	0.4347		0.5421	0.4632	0.486		0.5356	0.5641	0.5812		-3.56	0.5397	0.5275	0.5836		0.547	0.4941	0.5527		0.5218	0.5315	0.5226		0.5299	0.5519	0.512
-3.55	0.4965	0.5104	0.4347		0.5413	0.4632	0.4868		0.5356	0.5641	0.5812		-3.55	0.5389	0.5275	0.5836		0.547	0.4933	0.5535		0.5218	0.5332	0.5226		0.5299	0.5486	0.5104
-3.54	0.4974	0.5104	0.4347		0.5413	0.464	0.4876		0.5348	0.5641	0.5812		-3.54	0.5381	0.5275	0.5836		0.547	0.4941	0.5543		0.5226	0.5332	0.5218		0.5299	0.5486	0.5096
-3.53	0.4974	0.5104	0.4339		0.5429	0.464	0.4884		0.5356	0.5641	0.582		-3.53	0.5372	0.5275	0.5836		0.5462	0.4941	0.5535		0.5226	0.5332	0.5218		0.5299	0.5486	0.5088
-3.52	0.4965	0.5104	0.433		0.5438	0.4632	0.4884		0.5332	0.5641	0.582		-3.52	0.5372	0.5275	0.5828		0.5462	0.4949	0.5535		0.5234	0.5324	0.521		0.5307	0.5519	0.5088
-3.51	0.4957	0.5104	0.433		0.5446	0.4632	0.4884		0.5332	0.5641	0.582		-3.51	0.5372	0.5267	0.5828		0.547	0.4949	0.5535		0.5234	0.5324	0.5218		0.5315	0.5519	0.5096
-3.5	0.4965	0.5096	0.4339		0.5454	0.4632	0.4884		0.5315	0.5633	0.5812		-3.5	0.5372	0.5267	0.5828		0.5462	0.4957	0.5535		0.5234	0.5324	0.521		0.5324	0.5519	0.5104
-3.49	0.4965	0.5096	0.4355		0.5454	0.464	0.4884		0.534	0.5625	0.5804		-3.49	0.5364	0.5267	0.5836		0.5454	0.4957	0.5543		0.5226	0.5324	0.521		0.5307	0.5519	0.5104
-3.48	0.4974	0.5096	0.4355		0.5446	0.4632	0.4884		0.534	0.5617	0.582		-3.48	0.5356	0.5275	0.5836		0.5446	0.4957	0.5543		0.5226	0.5315	0.5201		0.5299	0.5519	0.5112
-3.47	0.4982	0.5112	0.4355		0.5438	0.4624	0.4876		0.5324	0.5625	0.5828		-3.47	0.5356	0.5275	0.5836		0.5438	0.4957	0.5543		0.5226	0.5324	0.521		0.5283	0.5519	0.5104
-3.46	0.4998	0.512	0.4347		0.5421	0.4624	0.4868		0.5324	0.5641	0.5836		-3.46	0.5364	0.5283	0.5836		0.5438	0.4957	0.5527		0.5226	0.5324	0.521		0.5283	0.5519	0.5104
-3.45	0.499	0.5136	0.4347		0.5421	0.4632	0.486		0.5324	0.5649	0.582		-3.45	0.5372	0.5291	0.5836		0.5438	0.4957	0.5519		0.5226	0.5324	0.521		0.5283	0.5486	0.5096
-3.44	0.4982	0.5128	0.4355		0.5413	0.464	0.486		0.534	0.5649	0.582		-3.44	0.5364	0.5307	0.5828		0.5446	0.4957	0.5519		0.5234	0.5307	0.521		0.5283	0.5486	0.5104
-3.43	0.4965	0.512	0.4355		0.5421	0.464	0.486		0.534	0.5641	0.582		-3.43	0.5372	0.5307	0.582		0.5446	0.4957	0.5519		0.5234	0.5299	0.5218		0.5291	0.5486	0.5096
-3.42	0.4974	0.5104	0.4363		0.5421	0.4632	0.486		0.5324	0.5641	0.5812		-3.42	0.5381	0.5307	0.5812		0.5454	0.4957	0.5527		0.5226	0.5307	0.5226		0.5291	0.5519	0.5104
-3.41	0.4965	0.5104	0.4355		0.5421	0.4632	0.486		0.5332	0.5649	0.5804		-3.41	0.5397	0.5291	0.5812		0.5462	0.4957	0.5527		0.5218	0.5307	0.5218		0.5299	0.5519	0.5112
-3.4	0.4965	0.5104	0.4363		0.5421	0.4632	0.486		0.5332	0.5649	0.5771		-3.4	0.5389	0.5283	0.5812		0.5478	0.4957	0.5527		0.5218	0.5307	0.521		0.5291	0.5511	0.512
-3.39	0.4957	0.5104	0.4355		0.5421	0.464	0.4868		0.5348	0.5649	0.5779		-3.39	0.5372	0.5275	0.5812		0.5486	0.4957	0.5527		0.5226	0.5299	0.521		0.5299	0.5519	0.5112
-3.38	0.4957	0.5104	0.4355		0.5421	0.464	0.4884		0.5348	0.5641	0.5779		-3.38	0.5356	0.5275	0.5812		0.5478	0.4957	0.5535		0.5226	0.5299	0.521		0.5299	0.5519	0.5096
-3.37	0.4965	0.5112	0.4347		0.5429	0.4632	0.49		0.5324	0.5641	0.5812		-3.37	0.5356	0.5275	0.582		0.547	0.4949	0.5543		0.5234	0.5299	0.521		0.5307	0.5527	0.5096
-3.36	0.4974	0.512	0.4355		0.5446	0.4632	0.49		0.5324	0.5641	0.5812		-3.36	0.5364	0.5275	0.582		0.5462	0.4941	0.5551		0.5242	0.5307	0.5201		0.5299	0.5519	0.5088
-3.35	0.4974	0.5136	0.4355		0.5454	0.4624	0.4892		0.5324	0.5641	0.5788		-3.35	0.5372	0.5275	0.582		0.547	0.4949	0.5543		0.5242	0.5315	0.521		0.5291	0.5519	0.5096
-3.34	0.4965	0.5144	0.4355		0.5454	0.4632	0.4876		0.534	0.5641	0.5796		-3.34	0.5372	0.5275	0.5812		0.547	0.4957	0.5535		0.5242	0.5332	0.5218		0.5283	0.5511	0.5096
-3.33	0.4965	0.5153	0.4347		0.5446	0.4624	0.4868		0.534	0.5641	0.5804		-3.33	0.5372	0.5275	0.5812		0.5462	0.4965	0.5519		0.5242	0.5332	0.5218		0.5283	0.5503	0.5112
-3.32	0.4974	0.5144	0.4347		0.5446	0.4624	0.486		0.5324	0.5649	0.5836		-3.32	0.5372	0.5275	0.582		0.5454	0.4957	0.5519		0.5242	0.5332	0.5218		0.5283	0.5503	0.5112
-3.31	0.4974	0.5144	0.4347		0.5438	0.4615	0.486		0.534	0.5649	0.5828		-3.31	0.5372	0.5283	0.582		0.5454	0.4957	0.5519		0.5234	0.5324	0.5218		0.5283	0.5511	0.5104
-3.3	0.4965	0.5144	0.4355		0.5429	0.4615	0.486		0.534	0.5657	0.5804		-3.3	0.5372	0.5291	0.5828		0.5454	0.4949	0.5527		0.5234	0.5315	0.5218		0.5283	0.5478	0.5088
-3.29	0.4957	0.5144	0.4363		0.5421	0.4624	0.486		0.5356	0.5649	0.5804		-3.29	0.5372	0.5283	0.5828		0.5462	0.4949	0.5527		0.5234	0.5307	0.5218		0.5275	0.5478	0.5079
-3.28	0.4957	0.5128	0.4363		0.5421	0.4624	0.486		0.5356	0.5649	0.5804		-3.28	0.5372	0.5275	0.5828		0.5454	0.4949	0.5527		0.5234	0.5299	0.5218		0.5283	0.5478	0.5079
-3.27	0.4965	0.5112	0.4363		0.5421	0.4632	0.486		0.534	0.5641	0.582		-3.27	0.5372	0.5267	0.582		0.5462	0.4957	0.5527		0.5218	0.5299	0.5226		0.5283	0.5527	0.5088
-3.26	0.4974	0.5112	0.4355		0.5421	0.4632	0.4868		0.534	0.5641	0.5812		-3.26	0.5372	0.5283	0.582		0.5462	0.4957	0.5535		0.5226	0.5299	0.5234		0.5299	0.5535	0.5096
-3.25	0.4982	0.5112	0.4371		0.5421	0.4632	0.4876		0.5332	0.5641	0.5788		-3.25	0.5372	0.5291	0.582		0.5478	0.4957	0.5543		0.5226	0.5299	0.5242		0.5299	0.5511	0.5104
-3.24	0.4982	0.5112	0.4379		0.5421	0.4632	0.4884		0.5348	0.5641	0.5788		-3.24	0.5364	0.5291	0.582		0.5478	0.4957	0.5543		0.5234	0.5299	0.5242		0.5307	0.5495	0.5096
-3.23	0.4982	0.5104	0.4387		0.5421	0.4632	0.4892		0.5348	0.5641	0.5779		-3.23	0.5364	0.5283	0.5812		0.547	0.4965	0.5543		0.5226	0.5307	0.5234		0.5307	0.5486	0.5088
-3.22	0.4982	0.5104	0.4379		0.5429	0.464	0.4892		0.5324	0.5641	0.5804		-3.22	0.5364	0.5275	0.582		0.5462	0.4974	0.5535		0.5234	0.5315	0.5218		0.5307	0.5511	0.5088
-3.21	0.4982	0.5104	0.4371		0.5438	0.464	0.4884		0.5324	0.5641	0.5804		-3.21	0.5372	0.5275	0.5828		0.547	0.4974	0.5535		0.5242	0.5315	0.5218		0.5299	0.5519	0.5096
-3.2	0.4982	0.5112	0.4363		0.5438	0.4632	0.4868		0.5324	0.5641	0.5788		-3.2	0.5364	0.5275	0.5836		0.5478	0.4957	0.5535		0.5242	0.5307	0.5218		0.5291	0.5486	0.5104
-3.19	0.4982	0.5128	0.4355		0.5438	0.4632	0.486		0.5348	0.5649	0.5796		-3.19	0.5364	0.5283	0.5836		0.547	0.4949	0.5543		0.5242	0.5307	0.5226		0.5283	0.5486	0.5096
-3.18	0.4974	0.5136	0.4347		0.5438	0.4632	0.486		0.5356	0.5649	0.5804		-3.18	0.5364	0.5283	0.5836		0.547	0.4941	0.5535		0.5234	0.5307	0.5226		0.5283	0.5486	0.5104
-3.17	0.4965	0.5128	0.4347		0.5438	0.464	0.4868		0.534	0.5649	0.5836		-3.17	0.5372	0.5283	0.5836		0.547	0.4949	0.5535		0.5234	0.5315	0.5226		0.5283	0.5527	0.5104
-3.16	0.4957	0.5112	0.4347		0.5429	0.4632	0.4868		0.5348	0.5641	0.5836		-3.16	0.5372	0.5275	0.5836		0.547	0.4949	0.5527		0.5234	0.5315	0.5226		0.5291	0.5527	0.5104
-3.15	0.4965	0.5112	0.4355		0.5421	0.4624	0.4868		0.534	0.5641	0.5836		-3.15	0.5372	0.5275	0.5836		0.5454	0.4957	0.5535		0.5234	0.5324	0.5226		0.5291	0.5495	0.5104
-3.14	0.4965	0.5112	0.4355		0.5429	0.4624	0.486		0.5356	0.5641	0.582		-3.14	0.5372	0.5283	0.5828		0.5454	0.4949	0.5527		0.5234	0.5315	0.5218		0.5307	0.5486	0.5104
-3.13	0.4965	0.5112	0.4355		0.5429	0.4632	0.486		0.5348	0.5641	0.5812		-3.13	0.5372	0.5283	0.582		0.5462	0.4949	0.5527		0.5234	0.5307	0.5218		0.5299	0.5486	0.5104
-3.12	0.4965	0.5104	0.4347		0.5429	0.464	0.486		0.5332	0.5649	0.5804		-3.12	0.5372	0.5283	0.582		0.547	0.4949	0.5519		0.5242	0.5299	0.5226		0.5299	0.5519	0.5096
-3.11	0.4965	0.5104	0.4355		0.5429	0.464	0.486		0.5332	0.5649	0.5812		-3.11	0.5364	0.5283	0.582		0.5478	0.4957	0.5527		0.525	0.5299	0.5242		0.5291	0.5519	0.5096
-3.1	0.4965	0.5104	0.4363		0.5438	0.464	0.4868		0.5332	0.5649	0.5788		-3.1	0.5356	0.5283	0.5828		0.5486	0.4957	0.5527		0.5242	0.5307	0.525		0.5299	0.5511	0.5104
-3.09	0.4957	0.5104	0.4379		0.5438	0.464	0.4884		0.534	0.5649	0.5779		-3.09	0.5364	0.5291	0.5828		0.5495	0.4957	0.5527		0.5234	0.5315	0.525		0.5299	0.5519	0.5096
-3.08	0.4965	0.5104	0.4379		0.5429	0.4648	0.49		0.5332	0.5657	0.5779		-3.08	0.5381	0.5275	0.5836		0.547	0.4965	0.5527		0.5234	0.5324	0.5242		0.5299	0.5519	0.5088
-3.07	0.4974	0.5096	0.4379		0.5421	0.4648	0.4892		0.5315	0.5665	0.5804		-3.07	0.5389	0.5267	0.5828		0.5454	0.4965	0.5535		0.5234	0.5324	0.5234		0.5291	0.5527	0.5088
-3.06	0.4982	0.5096	0.4371		0.5429	0.4656	0.4876		0.5315	0.5665	0.5812		-3.06	0.5381	0.5258	0.5828		0.5438	0.4965	0.5543		0.5234	0.5324	0.5226		0.5291	0.5527	0.5104
-3.05	0.4974	0.5112	0.4363		0.5429	0.4656	0.4851		0.5324	0.5657	0.5788		-3.05	0.5372	0.5267	0.5828		0.5446	0.4957	0.5535		0.5226	0.5315	0.5226		0.5283	0.5503	0.5112
-3.04	0.4974	0.5128	0.4355		0.5429	0.4656	0.4851		0.534	0.5649	0.5796		-3.04	0.5372	0.5275	0.5836		0.5454	0.4974	0.5527		0.5226	0.5315	0.5218		0.5307	0.5511	0.5112
-3.03	0.4974	0.5144	0.4347		0.5421	0.4656	0.4851		0.5356	0.5641	0.5804		-3.03	0.5372	0.5275	0.5836		0.5462	0.4965	0.5519		0.5226	0.5324	0.521		0.5307	0.5503	0.5104
-3.02	0.4982	0.5128	0.4347		0.5421	0.464	0.4868		0.5348	0.5641	0.582		-3.02	0.5372	0.5275	0.5836		0.5462	0.4965	0.5527		0.5226	0.5332	0.521		0.5315	0.5527	0.5104
-3.01	0.4974	0.512	0.4347		0.5429	0.4632	0.4876		0.5356	0.5641	0.5812		-3.01	0.5372	0.5275	0.5836		0.5454	0.4941	0.5535		0.5226	0.5332	0.5218		0.5299	0.5527	0.5104
-3	0.4965	0.5104	0.4347		0.5429	0.4615	0.4876		0.5356	0.5641	0.5812		-3	0.5372	0.5267	0.5828		0.5446	0.4949	0.5535		0.5234	0.5315	0.5226		0.5299	0.5495	0.5104
-2.99	0.4957	0.5104	0.4347		0.5429	0.4624	0.4868		0.5364	0.5641	0.582		-2.99	0.5372	0.5267	0.582		0.5446	0.4965	0.5527		0.5242	0.5307	0.5226		0.5291	0.5495	0.5104
-2.98	0.4965	0.5104	0.4347		0.5429	0.4632	0.4868		0.5356	0.5641	0.582		-2.98	0.5372	0.5267	0.582		0.5446	0.4974	0.5519		0.5242	0.5307	0.5226		0.5283	0.5486	0.5112
-2.97	0.4974	0.5104	0.4347		0.5438	0.464	0.4876		0.5348	0.5641	0.5812		-2.97	0.5364	0.5275	0.582		0.5454	0.4974	0.5519		0.5242	0.5315	0.5226		0.5283	0.5519	0.5112
-2.96	0.4982	0.5104	0.4347		0.5446	0.464	0.4884		0.5348	0.5649	0.5812		-2.96	0.5364	0.5283	0.5828		0.5454	0.4957	0.5519		0.5242	0.5324	0.5226		0.5291	0.5527	0.512
-2.95	0.4974	0.5104	0.4363		0.5438	0.464	0.4884		0.5348	0.5657	0.5812		-2.95	0.5356	0.5283	0.5828		0.5454	0.4957	0.5527		0.5242	0.5324	0.5218		0.5299	0.5519	0.5104
-2.94	0.4965	0.5112	0.4371		0.5438	0.4648	0.4876		0.5348	0.5665	0.5812		-2.94	0.5356	0.5291	0.5836		0.5454	0.4965	0.5527		0.5234	0.5324	0.521		0.5307	0.5527	0.5112
-2.93	0.4957	0.5112	0.4379		0.5429	0.4656	0.4868		0.5348	0.5665	0.582		-2.93	0.5348	0.5283	0.5828		0.5446	0.4957	0.5527		0.5234	0.5324	0.521		0.5315	0.5519	0.5104
-2.92	0.4957	0.5112	0.4371		0.5429	0.4664	0.486		0.5348	0.5665	0.582		-2.92	0.5356	0.5283	0.582		0.5446	0.4949	0.5535		0.5242	0.5324	0.5226		0.5324	0.5527	0.5112
-2.91	0.4957	0.5112	0.4355		0.5421	0.4664	0.486		0.5348	0.5665	0.582		-2.91	0.5364	0.5283	0.5812		0.5446	0.4941	0.5535		0.5242	0.5324	0.5226		0.5324	0.5519	0.5104
-2.9	0.4957	0.512	0.4347		0.5421	0.4656	0.486		0.5348	0.5657	0.5812		-2.9	0.5372	0.5291	0.5812		0.5454	0.4957	0.5535		0.5234	0.5324	0.5226		0.5315	0.5495	0.5096
-2.89	0.4965	0.5128	0.4339		0.5421	0.4648	0.4868		0.5348	0.5641	0.5812		-2.89	0.5364	0.5299	0.582		0.5454	0.4974	0.5543		0.5226	0.5324	0.521		0.5299	0.5495	0.5096
-2.88	0.4974	0.512	0.4347		0.5429	0.464	0.4876		0.5356	0.5633	0.5804		-2.88	0.5364	0.5291	0.582		0.5454	0.4974	0.5551		0.5218	0.5332	0.521		0.5291	0.5495	0.5104
-2.87	0.499	0.5112	0.4347		0.5438	0.464	0.4876		0.5364	0.5633	0.5804		-2.87	0.5364	0.5291	0.5828		0.5454	0.4965	0.556		0.5226	0.534	0.5201		0.5291	0.5519	0.5112
-2.86	0.4998	0.5104	0.4347		0.5438	0.464	0.4868		0.5356	0.5641	0.5796		-2.86	0.5372	0.5283	0.582		0.5454	0.4957	0.5543		0.5234	0.534	0.5201		0.5299	0.5527	0.512
-2.85	0.5006	0.5104	0.4347		0.5429	0.4632	0.4868		0.534	0.5641	0.5796		-2.85	0.5364	0.5283	0.582		0.5454	0.4957	0.5535		0.525	0.5332	0.521		0.5299	0.5503	0.512
-2.84	0.5006	0.5104	0.4347		0.5421	0.4632	0.4868		0.5332	0.5641	0.5796		-2.84	0.5364	0.5283	0.5812		0.5454	0.4965	0.5527		0.525	0.5332	0.5218		0.5307	0.5519	0.5128
-2.83	0.4998	0.5112	0.4347		0.5421	0.4632	0.4868		0.534	0.5641	0.5804		-2.83	0.5356	0.5291	0.582		0.5462	0.4965	0.5527		0.525	0.5332	0.5226		0.5315	0.5519	0.5128
-2.82	0.499	0.5112	0.4347		0.5421	0.4632	0.486		0.5348	0.5641	0.5804		-2.82	0.5364	0.5299	0.582		0.5454	0.4957	0.5527		0.525	0.5332	0.5226		0.5315	0.5551	0.5128
-2.81	0.4974	0.5112	0.4347		0.5421	0.4632	0.486		0.5348	0.5641	0.5796		-2.81	0.5364	0.5291	0.5828		0.5462	0.4949	0.5535		0.525	0.5324	0.5234		0.5299	0.5535	0.512
-2.8	0.4974	0.5104	0.4347		0.5429	0.4632	0.486		0.5348	0.5649	0.5804		-2.8	0.5372	0.5291	0.582		0.5454	0.4957	0.5535		0.5242	0.5315	0.5242		0.5283	0.5535	0.5104
-2.79	0.4974	0.5112	0.4347		0.5438	0.464	0.486		0.5348	0.5665	0.5812		-2.79	0.5381	0.5291	0.582		0.5462	0.4974	0.5543		0.5234	0.5307	0.5242		0.5299	0.5519	0.5096
-2.78	0.4982	0.512	0.4347		0.5446	0.4648	0.486		0.534	0.5674	0.582		-2.78	0.5381	0.5291	0.5812		0.5462	0.4965	0.5551		0.5234	0.5307	0.5234		0.5315	0.5519	0.5096
-2.77	0.4982	0.512	0.4347		0.5438	0.4656	0.4868		0.534	0.5674	0.5812		-2.77	0.5381	0.5283	0.5812		0.547	0.4949	0.5551		0.5242	0.5307	0.5226		0.5332	0.5511	0.5112
-2.76	0.4974	0.5112	0.4347		0.5438	0.4664	0.4876		0.534	0.5665	0.5812		-2.76	0.5372	0.5275	0.5812		0.547	0.4941	0.556		0.5242	0.5307	0.521		0.5324	0.5519	0.5104
-2.75	0.4974	0.5112	0.4347		0.5438	0.4664	0.4884		0.5348	0.5657	0.5812		-2.75	0.5372	0.5275	0.5812		0.547	0.4941	0.5551		0.5234	0.5307	0.521		0.5324	0.5511	0.5104
-2.74	0.4974	0.512	0.4347		0.5446	0.4656	0.4876		0.5348	0.5649	0.5812		-2.74	0.5372	0.5275	0.582		0.5462	0.4965	0.5568		0.5234	0.5315	0.521		0.5307	0.5503	0.5096
-2.73	0.4982	0.512	0.4347		0.5446	0.464	0.4868		0.5348	0.5649	0.5812		-2.73	0.5372	0.5275	0.582		0.5462	0.4957	0.556		0.5242	0.5324	0.5218		0.5299	0.5503	0.5112
-2.72	0.499	0.5112	0.4347		0.5438	0.4632	0.4868		0.5348	0.5649	0.5812		-2.72	0.5372	0.5283	0.5828		0.5462	0.4957	0.556		0.5242	0.5315	0.5218		0.5291	0.5511	0.5112
-2.71	0.4998	0.5104	0.4347		0.5438	0.4624	0.4868		0.534	0.5649	0.5804		-2.71	0.5372	0.5291	0.5828		0.5462	0.4933	0.5535		0.5242	0.5315	0.521		0.5291	0.5519	0.5112
-2.7	0.5006	0.5104	0.4347		0.5429	0.4624	0.4876		0.5332	0.5641	0.5804		-2.7	0.5372	0.5307	0.5836		0.5454	0.4933	0.5527		0.5242	0.5307	0.521		0.5283	0.5519	0.5112
-2.69	0.4998	0.5104	0.4347		0.5421	0.4615	0.4868		0.5332	0.5641	0.5804		-2.69	0.5381	0.5307	0.5836		0.5454	0.4949	0.5535		0.525	0.5315	0.521		0.5275	0.5519	0.512
-2.68	0.499	0.5104	0.4347		0.5421	0.4615	0.4876		0.534	0.5641	0.5812		-2.68	0.5389	0.5307	0.5836		0.5462	0.4957	0.5543		0.525	0.5307	0.5218		0.5283	0.5519	0.5112
-2.67	0.4982	0.5104	0.4347		0.5429	0.4624	0.4876		0.5348	0.5641	0.5812		-2.67	0.5397	0.5299	0.5836		0.547	0.4957	0.5543		0.5242	0.5307	0.5234		0.5283	0.5519	0.5096
-2.66	0.4982	0.5112	0.4347		0.5446	0.4624	0.4884		0.5348	0.5649	0.5812		-2.66	0.5397	0.5299	0.5836		0.5462	0.4949	0.5527		0.5234	0.5299	0.5226		0.5283	0.5519	0.5079
-2.65	0.4982	0.5104	0.4347		0.5429	0.4624	0.4884		0.5348	0.5649	0.5812		-2.65	0.5389	0.5299	0.5828		0.5462	0.4949	0.5519		0.5226	0.5299	0.5226		0.5275	0.5511	0.5088
-2.64	0.4974	0.5104	0.4347		0.5421	0.4624	0.4892		0.5348	0.5649	0.5812		-2.64	0.5389	0.5291	0.5828		0.547	0.4974	0.5527		0.5226	0.5307	0.5218		0.5299	0.5503	0.5096
-2.63	0.4974	0.5096	0.4347		0.5421	0.4624	0.4892		0.5348	0.5641	0.5812		-2.63	0.5381	0.5291	0.582		0.5478	0.4974	0.5535		0.5226	0.5307	0.5226		0.5315	0.5503	0.5104
-2.62	0.4974	0.5104	0.4347		0.5438	0.4632	0.49		0.5348	0.5641	0.5812		-2.62	0.5372	0.5283	0.5828		0.5486	0.4974	0.5543		0.5234	0.5315	0.5226		0.5332	0.5511	0.5096
-2.61	0.4982	0.5104	0.4347		0.5454	0.4624	0.4892		0.5348	0.5641	0.582		-2.61	0.5356	0.5283	0.582		0.547	0.4949	0.5543		0.5234	0.5307	0.5226		0.5324	0.5519	0.5088
-2.6	0.4982	0.5112	0.4347		0.5454	0.4624	0.4892		0.5348	0.5641	0.582		-2.6	0.5356	0.5275	0.5828		0.547	0.4941	0.5543		0.5234	0.5315	0.5226		0.5315	0.5519	0.5079
-2.59	0.4982	0.5112	0.4347		0.5454	0.4615	0.4884		0.5348	0.5641	0.582		-2.59	0.5364	0.5275	0.5828		0.5462	0.4949	0.5551		0.5226	0.5324	0.5226		0.5307	0.5519	0.5088
-2.58	0.4982	0.5112	0.4347		0.5446	0.4624	0.4876		0.5356	0.5641	0.5812		-2.58	0.5372	0.5275	0.5836		0.5462	0.4949	0.5551		0.5226	0.534	0.5226		0.5299	0.5519	0.5096
-2.57	0.499	0.5104	0.4347		0.5446	0.4624	0.4884		0.5348	0.5641	0.582		-2.57	0.5372	0.5283	0.5836		0.5454	0.4957	0.5551		0.5226	0.534	0.5218		0.5291	0.5519	0.5112
-2.56	0.4998	0.5096	0.4355		0.5446	0.4632	0.4884		0.5348	0.5641	0.5828		-2.56	0.5372	0.5291	0.5836		0.5446	0.4941	0.5535		0.5234	0.5332	0.5218		0.5283	0.5519	0.512
-2.55	0.4998	0.5104	0.4355		0.5446	0.4624	0.4892		0.534	0.5641	0.5828		-2.55	0.5372	0.5307	0.5836		0.5454	0.4941	0.5527		0.5242	0.5315	0.5218		0.5283	0.5519	0.512
-2.54	0.4982	0.5112	0.4355		0.5438	0.4632	0.4884		0.534	0.5641	0.582		-2.54	0.5381	0.5299	0.5836		0.5462	0.4933	0.5519		0.5242	0.5307	0.5226		0.5291	0.5519	0.512
-2.53	0.4965	0.512	0.4347		0.5438	0.4624	0.4876		0.534	0.5649	0.5812		-2.53	0.5389	0.5291	0.5836		0.547	0.4933	0.5519		0.5234	0.5299	0.5226		0.5291	0.5519	0.5112
-2.52	0.4965	0.5104	0.4347		0.5429	0.4632	0.4876		0.5381	0.5649	0.5812		-2.52	0.5397	0.5283	0.582		0.547	0.4941	0.5519		0.5226	0.5299	0.5226		0.5291	0.5535	0.5112
-2.51	0.4965	0.5096	0.4355		0.5438	0.4624	0.4876		0.5389	0.5649	0.5812		-2.51	0.5389	0.5283	0.582		0.547	0.4949	0.5519		0.5226	0.5307	0.5234		0.5283	0.5543	0.5104
-2.5	0.4982	0.5104	0.4355		0.5429	0.4632	0.4884		0.5389	0.5641	0.5812		-2.5	0.5381	0.5283	0.5812		0.5462	0.4957	0.5527		0.5226	0.5307	0.5242		0.5291	0.5543	0.5104
-2.49	0.4974	0.5112	0.4355		0.5429	0.4632	0.4892		0.5348	0.5641	0.5812		-2.49	0.5372	0.5275	0.5828		0.5454	0.4974	0.5527		0.5226	0.5307	0.5242		0.5299	0.5527	0.5104
-2.48	0.4974	0.5112	0.4347		0.5429	0.464	0.4892		0.5348	0.5641	0.5812		-2.48	0.5372	0.5275	0.5828		0.5446	0.4974	0.5527		0.5226	0.5299	0.5226		0.5315	0.5519	0.5104
-2.47	0.4957	0.5112	0.4347		0.5438	0.464	0.4892		0.5389	0.5641	0.5812		-2.47	0.5372	0.5275	0.5836		0.5446	0.4974	0.5535		0.5226	0.5299	0.5218		0.5324	0.5519	0.5112
-2.46	0.4957	0.5112	0.4355		0.5454	0.464	0.4884		0.5389	0.5641	0.582		-2.46	0.5364	0.5275	0.5836		0.5446	0.4965	0.5543		0.5226	0.5307	0.521		0.5307	0.5519	0.5112
-2.45	0.4965	0.512	0.4355		0.5462	0.464	0.4884		0.5389	0.5641	0.5828		-2.45	0.5364	0.5275	0.5836		0.5454	0.4965	0.5543		0.5226	0.5315	0.521		0.5299	0.5519	0.5112
-2.44	0.4965	0.512	0.4355		0.5462	0.464	0.4884		0.5348	0.5641	0.5836		-2.44	0.5364	0.5275	0.5836		0.5454	0.4957	0.5527		0.5226	0.5324	0.5201		0.5275	0.5519	0.5112
-2.43	0.4974	0.5128	0.4347		0.5446	0.464	0.4884		0.534	0.5641	0.5836		-2.43	0.5372	0.5275	0.5836		0.547	0.4957	0.5519		0.5234	0.5315	0.521		0.5275	0.5519	0.512
-2.42	0.4965	0.512	0.4347		0.5429	0.464	0.4884		0.5397	0.5641	0.5836		-2.42	0.5372	0.5275	0.5836		0.547	0.4949	0.5519		0.5242	0.5307	0.5218		0.5275	0.5519	0.512
-2.41	0.4974	0.5112	0.4347		0.5421	0.464	0.4876		0.5389	0.5641	0.5836		-2.41	0.5372	0.5283	0.5845		0.5478	0.4949	0.5511		0.525	0.5307	0.5226		0.5283	0.5519	0.5112
-2.4	0.4974	0.5112	0.4355		0.5421	0.464	0.4868		0.5397	0.5641	0.5836		-2.4	0.5372	0.5299	0.5845		0.547	0.4941	0.5511		0.5242	0.5315	0.5226		0.5291	0.5519	0.5096
-2.39	0.4974	0.5112	0.4355		0.5429	0.4648	0.486		0.534	0.5641	0.5836		-2.39	0.5372	0.5307	0.5845		0.5462	0.4949	0.5511		0.5226	0.5315	0.5226		0.5283	0.5519	0.5088
-2.38	0.4965	0.5112	0.4355		0.5429	0.4648	0.4868		0.5348	0.5649	0.582		-2.38	0.5372	0.5291	0.5836		0.5454	0.4949	0.5519		0.5218	0.5315	0.5226		0.5283	0.5519	0.5088
-2.37	0.4965	0.5104	0.4347		0.5429	0.4648	0.4868		0.5389	0.5649	0.5812		-2.37	0.5364	0.5267	0.5836		0.5454	0.4949	0.5519		0.5218	0.5315	0.5226		0.5283	0.5511	0.5096
-2.36	0.4965	0.5112	0.4347		0.5429	0.464	0.4876		0.5389	0.5649	0.5812		-2.36	0.5364	0.5258	0.5836		0.547	0.4949	0.5519		0.5226	0.5315	0.5218		0.5299	0.5503	0.5104
-2.35	0.4974	0.512	0.4339		0.5429	0.464	0.4876		0.5389	0.5641	0.5812		-2.35	0.5364	0.5275	0.5828		0.5478	0.4957	0.5527		0.5226	0.5307	0.5226		0.5307	0.5503	0.5096
-2.34	0.4965	0.512	0.4339		0.5429	0.464	0.4884		0.5348	0.5641	0.5812		-2.34	0.5372	0.5291	0.5828		0.5478	0.4949	0.5535		0.5226	0.5307	0.5226		0.5299	0.5511	0.5096
-2.33	0.4965	0.512	0.4347		0.5429	0.464	0.4884		0.5348	0.5641	0.5804		-2.33	0.5372	0.5291	0.582		0.5486	0.4965	0.5535		0.5226	0.5307	0.5242		0.5291	0.5519	0.5096
-2.32	0.4965	0.5112	0.4363		0.5438	0.464	0.4868		0.5381	0.5641	0.5812		-2.32	0.5364	0.5283	0.5828		0.5486	0.4974	0.5535		0.5226	0.5315	0.5234		0.5283	0.5519	0.5104
-2.31	0.4974	0.512	0.4363		0.5429	0.4632	0.486		0.5381	0.5641	0.582		-2.31	0.5364	0.5275	0.5828		0.5486	0.499	0.5527		0.5234	0.5315	0.5234		0.5291	0.5519	0.5104
-2.3	0.4974	0.5128	0.4355		0.5421	0.4624	0.4851		0.5381	0.5649	0.5828		-2.3	0.5364	0.5267	0.5828		0.5462	0.4974	0.5527		0.5234	0.5324	0.5226		0.5291	0.5519	0.5112
-2.29	0.4974	0.5144	0.4347		0.5413	0.4615	0.486		0.5356	0.5649	0.5836		-2.29	0.5372	0.5267	0.582		0.5462	0.4974	0.5519		0.5242	0.5315	0.5226		0.5291	0.5519	0.512
-2.28	0.4974	0.5144	0.4355		0.5413	0.4624	0.486		0.5364	0.5649	0.5836		-2.28	0.5372	0.5267	0.582		0.5454	0.4965	0.5519		0.5242	0.5307	0.5226		0.5291	0.5527	0.512
-2.27	0.499	0.5136	0.4355		0.5413	0.4624	0.486		0.5397	0.5649	0.5828		-2.27	0.5372	0.5283	0.582		0.5462	0.4957	0.5527		0.525	0.5299	0.5226		0.5291	0.5527	0.5112
-2.26	0.5006	0.512	0.4347		0.5413	0.4632	0.486		0.5389	0.5657	0.5828		-2.26	0.5364	0.5299	0.5828		0.5454	0.4949	0.5527		0.5242	0.5307	0.5226		0.5299	0.5527	0.5104
-2.25	0.5014	0.512	0.4339		0.5421	0.4624	0.486		0.5389	0.5665	0.5828		-2.25	0.5356	0.5315	0.5828		0.5454	0.4949	0.5535		0.5234	0.5315	0.5218		0.5299	0.5527	0.5104
-2.24	0.4998	0.512	0.429		0.5421	0.4632	0.486		0.5364	0.5657	0.5828		-2.24	0.5348	0.5315	0.5828		0.5446	0.4957	0.5535		0.5226	0.5324	0.5218		0.5291	0.5519	0.5104
-2.23	0.4982	0.5128	0.4298		0.5421	0.464	0.486		0.5364	0.5649	0.582		-2.23	0.5356	0.5307	0.582		0.5454	0.4957	0.5543		0.5226	0.5324	0.521		0.5291	0.5519	0.5104
-2.22	0.4965	0.512	0.4298		0.5421	0.4648	0.486		0.5372	0.5649	0.5812		-2.22	0.5356	0.5299	0.582		0.547	0.4957	0.5543		0.5234	0.5324	0.5218		0.5291	0.5527	0.5096
-2.21	0.4974	0.5112	0.4355		0.5421	0.4648	0.486		0.5364	0.5649	0.5812		-2.21	0.5356	0.5299	0.5828		0.5486	0.4957	0.5543		0.5234	0.5315	0.521		0.5299	0.5543	0.5096
-2.2	0.4974	0.5104	0.4371		0.5421	0.464	0.4868		0.5364	0.5665	0.5804		-2.2	0.5356	0.5299	0.5828		0.5495	0.4957	0.5535		0.5242	0.5307	0.521		0.5307	0.5543	0.5096
-2.19	0.4974	0.5104	0.4379		0.5421	0.4648	0.4868		0.5348	0.5674	0.5796		-2.19	0.5356	0.5291	0.582		0.5495	0.4965	0.5527		0.5242	0.5307	0.521		0.5315	0.5527	0.5104
-2.18	0.4974	0.5104	0.4379		0.5429	0.4656	0.4868		0.5348	0.5682	0.5796		-2.18	0.5356	0.5283	0.5812		0.5478	0.4974	0.5535		0.525	0.5315	0.5218		0.5324	0.5519	0.5112
-2.17	0.4974	0.5104	0.4371		0.5429	0.4664	0.4851		0.5356	0.5674	0.5804		-2.17	0.5348	0.5275	0.5812		0.5462	0.4974	0.5543		0.525	0.5324	0.5234		0.5324	0.5519	0.5112
-2.16	0.4982	0.5112	0.4371		0.5429	0.4656	0.4851		0.5356	0.5665	0.5812		-2.16	0.5356	0.5275	0.5812		0.5446	0.4965	0.5551		0.525	0.5332	0.5234		0.5324	0.5519	0.512
-2.15	0.4982	0.5128	0.4363		0.5421	0.4656	0.4851		0.5364	0.5665	0.582		-2.15	0.5364	0.5267	0.5812		0.5454	0.4957	0.5535		0.5242	0.534	0.5226		0.5315	0.5519	0.5112
-2.14	0.4982	0.5144	0.4355		0.5429	0.4648	0.486		0.5364	0.5657	0.5828		-2.14	0.5372	0.5275	0.5812		0.5462	0.4957	0.5527		0.5242	0.5348	0.5218		0.5307	0.5519	0.512
-2.13	0.4982	0.5144	0.4347		0.5429	0.4648	0.486		0.5372	0.5657	0.5828		-2.13	0.5372	0.5283	0.582		0.5462	0.4949	0.5519		0.5234	0.5348	0.5218		0.5307	0.5519	0.5112
-2.12	0.4974	0.5128	0.4347		0.5421	0.464	0.4868		0.5372	0.5657	0.5828		-2.12	0.5372	0.5299	0.5828		0.5454	0.4949	0.5519		0.5242	0.534	0.5226		0.5307	0.5519	0.512
-2.11	0.4974	0.512	0.4347		0.5413	0.464	0.4868		0.5372	0.5657	0.582		-2.11	0.5372	0.5299	0.5836		0.5446	0.4949	0.5527		0.5242	0.534	0.5218		0.5307	0.5527	0.512
-2.1	0.4965	0.5112	0.4347		0.5413	0.464	0.486		0.5372	0.5657	0.5812		-2.1	0.5381	0.5291	0.5828		0.5446	0.4957	0.5527		0.525	0.5332	0.5218		0.5291	0.5527	0.512
-2.09	0.4974	0.512	0.4347		0.5421	0.4632	0.486		0.5364	0.5649	0.5804		-2.09	0.5381	0.5283	0.582		0.5446	0.4957	0.5535		0.525	0.5332	0.5218		0.5299	0.5519	0.512
-2.08	0.4974	0.5112	0.4347		0.5429	0.4632	0.4868		0.5356	0.5682	0.5796		-2.08	0.5381	0.5275	0.5812		0.5454	0.4949	0.5535		0.525	0.5315	0.5226		0.5299	0.5511	0.5104
-2.07	0.4982	0.5112	0.4355		0.5438	0.4624	0.4876		0.534	0.5682	0.5804		-2.07	0.5364	0.5283	0.582		0.5462	0.4949	0.5543		0.525	0.5307	0.5234		0.5307	0.5519	0.5096
-2.06	0.4982	0.5104	0.4371		0.5438	0.4624	0.4876		0.534	0.5698	0.5804		-2.06	0.5364	0.5291	0.582		0.5478	0.4949	0.5535		0.525	0.5299	0.5242		0.5299	0.5527	0.5096
-2.05	0.4982	0.5104	0.4387		0.5438	0.4624	0.4868		0.534	0.5682	0.5812		-2.05	0.5356	0.5291	0.582		0.547	0.4957	0.5535		0.5242	0.5307	0.525		0.5299	0.5519	0.5104
-2.04	0.4982	0.5104	0.4387		0.5429	0.4632	0.4868		0.5348	0.5682	0.5812		-2.04	0.5364	0.5283	0.582		0.5462	0.4974	0.5527		0.5234	0.5315	0.525		0.5291	0.5503	0.5104
-2.03	0.4982	0.5104	0.4379		0.5438	0.4648	0.486		0.5348	0.5674	0.5812		-2.03	0.5364	0.5275	0.582		0.5446	0.4974	0.5535		0.5226	0.5315	0.525		0.5291	0.5503	0.5088
-2.02	0.4982	0.5104	0.4371		0.5429	0.4656	0.4868		0.5332	0.5657	0.5812		-2.02	0.5372	0.5275	0.582		0.5446	0.4974	0.5527		0.5226	0.5315	0.5242		0.5291	0.5511	0.5079
-2.01	0.4974	0.5112	0.4363		0.5429	0.4656	0.4868		0.5332	0.5657	0.5812		-2.01	0.5372	0.5275	0.5812		0.5446	0.4957	0.5527		0.5226	0.5307	0.5234		0.5299	0.5519	0.5088
-2	0.4965	0.5128	0.4363		0.5421	0.4648	0.4868		0.534	0.5649	0.5812		-2	0.5372	0.5275	0.582		0.5446	0.4957	0.5527		0.5234	0.5315	0.5218		0.5299	0.5519	0.5096
-1.99	0.4965	0.5144	0.4355		0.5429	0.464	0.4868		0.5364	0.5649	0.5812		-1.99	0.5372	0.5275	0.5828		0.5454	0.4957	0.5535		0.5234	0.5307	0.5218		0.5299	0.5519	0.5096
-1.98	0.4974	0.5144	0.4355		0.5429	0.464	0.4868		0.5372	0.5641	0.5812		-1.98	0.5372	0.5283	0.5836		0.5462	0.4949	0.5543		0.5242	0.5307	0.5218		0.5299	0.5519	0.5096
-1.97	0.4998	0.5128	0.4347		0.5429	0.4632	0.4868		0.5372	0.5641	0.5804		-1.97	0.5372	0.5291	0.5836		0.547	0.4949	0.5543		0.5242	0.5299	0.5226		0.5299	0.5519	0.5096
-1.96	0.4998	0.512	0.4355		0.5421	0.4632	0.486		0.5372	0.5641	0.5804		-1.96	0.5372	0.5291	0.5836		0.547	0.4941	0.5535		0.525	0.5299	0.5226		0.5299	0.5527	0.5112
-1.95	0.5006	0.512	0.4355		0.5421	0.4632	0.4868		0.5364	0.5641	0.5796		-1.95	0.5372	0.5283	0.5845		0.547	0.4941	0.5527		0.5242	0.5307	0.5226		0.5299	0.5543	0.512
-1.94	0.4982	0.5128	0.4355		0.5421	0.464	0.4876		0.5356	0.5641	0.5796		-1.94	0.5372	0.5283	0.5845		0.547	0.4933	0.5519		0.5234	0.5315	0.5226		0.5307	0.5543	0.512
-1.93	0.4974	0.512	0.4347		0.5413	0.4632	0.4876		0.5348	0.5641	0.5804		-1.93	0.5372	0.5291	0.5845		0.547	0.4941	0.5519		0.5234	0.5315	0.5226		0.5299	0.5535	0.5112
-1.92	0.4957	0.5112	0.4355		0.5421	0.4632	0.4876		0.5348	0.5641	0.5812		-1.92	0.5372	0.5299	0.5836		0.547	0.4949	0.5519		0.5226	0.5307	0.5234		0.5291	0.5535	0.5104
-1.91	0.4957	0.5104	0.4363		0.5429	0.4624	0.4876		0.534	0.5649	0.582		-1.91	0.5372	0.5291	0.5836		0.5462	0.4957	0.5519		0.5226	0.5307	0.5242		0.5283	0.5543	0.5104
-1.9	0.4957	0.5104	0.4371		0.5446	0.4632	0.4876		0.5332	0.5657	0.5812		-1.9	0.5364	0.5283	0.5836		0.5454	0.4957	0.5519		0.5226	0.5307	0.5242		0.5291	0.5543	0.5104
-1.89	0.4957	0.5096	0.4371		0.5438	0.464	0.4876		0.5332	0.5665	0.5812		-1.89	0.5364	0.5275	0.5828		0.5446	0.4965	0.5527		0.5234	0.5315	0.5234		0.5307	0.5527	0.5104
-1.88	0.4965	0.5088	0.4363		0.5429	0.4656	0.4876		0.534	0.5665	0.582		-1.88	0.5364	0.5267	0.582		0.5446	0.4965	0.5527		0.5234	0.5307	0.5234		0.5315	0.5519	0.5104
-1.87	0.4974	0.5088	0.4355		0.5421	0.4664	0.4884		0.5348	0.5665	0.582		-1.87	0.5372	0.5267	0.5812		0.5446	0.4965	0.5527		0.5226	0.5315	0.5234		0.5324	0.5527	0.5104
-1.86	0.4974	0.5096	0.4347		0.5438	0.4656	0.4884		0.5348	0.5665	0.582		-1.86	0.5372	0.5267	0.582		0.5454	0.4957	0.5527		0.5226	0.5307	0.5234		0.5315	0.5527	0.5096
-1.85	0.4974	0.5104	0.4347		0.5446	0.4656	0.4876		0.5348	0.5657	0.5812		-1.85	0.5372	0.5275	0.5828		0.5462	0.4949	0.5535		0.5226	0.5307	0.5226		0.5307	0.5527	0.5096
-1.84	0.4974	0.5104	0.4339		0.5462	0.4648	0.4876		0.5356	0.5641	0.5812		-1.84	0.5372	0.5275	0.5836		0.5462	0.4941	0.5535		0.5226	0.5307	0.5226		0.5299	0.5519	0.5096
-1.83	0.4982	0.5104	0.4339		0.5454	0.464	0.4868		0.5348	0.5633	0.5812		-1.83	0.5372	0.5275	0.5836		0.5462	0.4933	0.5535		0.5226	0.5315	0.5226		0.5299	0.5519	0.5112
-1.82	0.4982	0.5112	0.4339		0.5446	0.4632	0.4868		0.5348	0.5625	0.5812		-1.82	0.5372	0.5275	0.5836		0.5462	0.4941	0.5527		0.5234	0.5315	0.5226		0.5299	0.5527	0.5128
-1.81	0.499	0.512	0.4355		0.5429	0.4632	0.4868		0.5324	0.5633	0.5812		-1.81	0.5372	0.5283	0.5828		0.5462	0.4949	0.5527		0.5242	0.5307	0.5226		0.5291	0.5535	0.5144
-1.8	0.499	0.5112	0.4355		0.5429	0.4632	0.4876		0.5324	0.5633	0.582		-1.8	0.5372	0.5291	0.5836		0.5462	0.4957	0.5519		0.5242	0.5307	0.5226		0.5291	0.5535	0.5144
-1.79	0.499	0.5096	0.4355		0.5429	0.4632	0.4884		0.5315	0.5641	0.582		-1.79	0.5381	0.5299	0.5836		0.5454	0.4949	0.5519		0.5234	0.5315	0.5226		0.5299	0.5543	0.5136
-1.78	0.4982	0.5088	0.4347		0.5429	0.4624	0.4884		0.5332	0.5641	0.582		-1.78	0.5389	0.5291	0.5845		0.5462	0.4941	0.5519		0.5218	0.5324	0.5226		0.5307	0.5543	0.5128
-1.77	0.4982	0.5096	0.4347		0.5429	0.4624	0.4876		0.534	0.5641	0.5812		-1.77	0.5389	0.5283	0.5836		0.5462	0.4941	0.5527		0.5226	0.5315	0.5234		0.5299	0.556	0.512
-1.76	0.4974	0.5104	0.4347		0.5429	0.4624	0.4876		0.5348	0.5649	0.5812		-1.76	0.5389	0.5275	0.5836		0.5478	0.4949	0.5527		0.5234	0.5315	0.5242		0.5283	0.5543	0.5112
-1.75	0.4974	0.5104	0.4347		0.5438	0.4632	0.4868		0.5348	0.5657	0.5812		-1.75	0.5381	0.5283	0.5836		0.5486	0.4957	0.5527		0.525	0.5299	0.525		0.5283	0.5543	0.5096
-1.74	0.4974	0.512	0.4347		0.5429	0.464	0.4876		0.5348	0.5665	0.5812		-1.74	0.5381	0.5283	0.5828		0.5486	0.4949	0.5527		0.525	0.5307	0.525		0.5299	0.5527	0.5096
-1.73	0.4982	0.512	0.4347		0.5438	0.4648	0.4876		0.534	0.5649	0.5812		-1.73	0.5364	0.5283	0.5828		0.547	0.4949	0.5527		0.5242	0.5307	0.5242		0.5315	0.5519	0.5096
-1.72	0.4974	0.512	0.4339		0.5438	0.4656	0.4884		0.534	0.5641	0.5812		-1.72	0.5364	0.5275	0.582		0.5454	0.4941	0.5527		0.5226	0.5324	0.5234		0.5332	0.5511	0.5104
-1.71	0.4974	0.5112	0.4339		0.5446	0.4648	0.4884		0.534	0.5625	0.5812		-1.71	0.5364	0.5275	0.582		0.5454	0.4941	0.5527		0.5218	0.5324	0.5226		0.5332	0.5519	0.5104
-1.7	0.4965	0.5112	0.4339		0.5446	0.464	0.4884		0.5356	0.5633	0.5812		-1.7	0.5372	0.5275	0.582		0.5454	0.4941	0.5535		0.5226	0.5324	0.5226		0.5332	0.5535	0.5104
-1.69	0.4974	0.5112	0.4347		0.5446	0.4624	0.4876		0.5356	0.5633	0.5812		-1.69	0.5364	0.5275	0.5828		0.5454	0.4933	0.5543		0.5234	0.5332	0.5226		0.5315	0.5535	0.5112
-1.68	0.4982	0.5112	0.4347		0.5446	0.4632	0.4876		0.5348	0.5641	0.5804		-1.68	0.5364	0.5275	0.5836		0.5446	0.4933	0.5543		0.5242	0.534	0.5226		0.5315	0.5535	0.5112
-1.67	0.4998	0.5112	0.4347		0.5438	0.4632	0.4868		0.534	0.5649	0.5804		-1.67	0.5356	0.5283	0.5836		0.5446	0.4933	0.5543		0.5242	0.5332	0.5226		0.5307	0.5527	0.5104
-1.66	0.4998	0.512	0.4347		0.5429	0.464	0.4876		0.5332	0.5649	0.5812		-1.66	0.5364	0.5299	0.5836		0.5446	0.4941	0.5543		0.525	0.5315	0.5218		0.5307	0.5527	0.5096
-1.65	0.499	0.512	0.4355		0.5421	0.464	0.4868		0.534	0.5649	0.582		-1.65	0.5364	0.5315	0.5836		0.5446	0.4949	0.5535		0.525	0.5307	0.5218		0.5299	0.5519	0.5104
-1.64	0.4982	0.512	0.4355		0.5421	0.464	0.4868		0.534	0.5641	0.582		-1.64	0.5381	0.5315	0.5836		0.5454	0.4925	0.5535		0.5242	0.5307	0.5218		0.5307	0.5527	0.5112
-1.63	0.4982	0.5112	0.4355		0.5421	0.464	0.486		0.534	0.5649	0.5804		-1.63	0.5389	0.5299	0.5836		0.5462	0.4933	0.5527		0.5234	0.5315	0.5226		0.5307	0.5535	0.5112
-1.62	0.4974	0.5104	0.4347		0.5421	0.464	0.486		0.534	0.5649	0.5796		-1.62	0.5389	0.5291	0.5828		0.547	0.4933	0.5527		0.5226	0.5315	0.5226		0.5307	0.5535	0.5096
-1.61	0.4974	0.5104	0.4355		0.5421	0.464	0.486		0.5356	0.5649	0.5796		-1.61	0.5381	0.5283	0.5828		0.5462	0.4957	0.5519		0.5234	0.5324	0.5218		0.5299	0.5527	0.5096
-1.6	0.4974	0.5104	0.4355		0.5421	0.464	0.4868		0.5364	0.5641	0.5812		-1.6	0.5364	0.5283	0.5828		0.5454	0.4957	0.5527		0.5234	0.5315	0.5218		0.5299	0.5511	0.5096
-1.59	0.4974	0.5112	0.4355		0.5429	0.464	0.4884		0.5364	0.5641	0.582		-1.59	0.5356	0.5275	0.5828		0.5438	0.4933	0.5535		0.5234	0.5307	0.5218		0.5299	0.5511	0.5104
-1.58	0.4974	0.5112	0.4347		0.5438	0.464	0.4884		0.5356	0.5641	0.582		-1.58	0.5356	0.5275	0.582		0.5446	0.4925	0.5551		0.5226	0.5307	0.5226		0.5307	0.5511	0.5096
-1.57	0.4965	0.512	0.4339		0.5454	0.4632	0.4884		0.5372	0.5649	0.5812		-1.57	0.5364	0.5275	0.582		0.5454	0.4917	0.556		0.5226	0.5315	0.5226		0.5315	0.5519	0.5096
-1.56	0.4974	0.5112	0.4347		0.5454	0.4624	0.4876		0.5372	0.5649	0.5804		-1.56	0.5372	0.5283	0.5828		0.547	0.4941	0.556		0.5234	0.5324	0.5226		0.5324	0.5519	0.5096
-1.55	0.4974	0.5112	0.4347		0.5454	0.4624	0.4884		0.5364	0.5649	0.5812		-1.55	0.5372	0.5283	0.5836		0.547	0.4949	0.5551		0.5242	0.5324	0.5226		0.5315	0.5511	0.5104
-1.54	0.4982	0.5104	0.4355		0.5446	0.4624	0.4876		0.5348	0.5641	0.582		-1.54	0.5364	0.5283	0.5836		0.5462	0.4957	0.5543		0.5242	0.5332	0.5218		0.5299	0.5503	0.5104
-1.53	0.499	0.5104	0.4347		0.5446	0.4632	0.4868		0.5348	0.5649	0.5836		-1.53	0.5356	0.5275	0.5836		0.5462	0.4957	0.5543		0.5242	0.534	0.5218		0.5291	0.5495	0.5112
-1.52	0.499	0.5112	0.4347		0.5438	0.4632	0.486		0.534	0.5649	0.5836		-1.52	0.5356	0.5283	0.5836		0.547	0.4957	0.5535		0.5242	0.534	0.5218		0.5291	0.5503	0.512
-1.51	0.499	0.512	0.4347		0.5429	0.464	0.486		0.534	0.5649	0.5836		-1.51	0.5364	0.5291	0.5836		0.5478	0.4957	0.5527		0.5242	0.5332	0.5226		0.5299	0.5511	0.512
-1.5	0.4982	0.512	0.4355		0.5421	0.464	0.4851		0.534	0.5649	0.5836		-1.5	0.5381	0.5299	0.582		0.5478	0.4957	0.5519		0.5234	0.5324	0.5226		0.5299	0.5519	0.5104
-1.49	0.4974	0.5112	0.4355		0.5421	0.464	0.4851		0.5348	0.5649	0.5828		-1.49	0.5381	0.5283	0.5812		0.5478	0.4957	0.5519		0.5226	0.5324	0.5226		0.5307	0.5519	0.5096
-1.48	0.4965	0.5104	0.4363		0.5421	0.464	0.4851		0.5348	0.5649	0.5812		-1.48	0.5372	0.5275	0.5804		0.5478	0.4957	0.5519		0.5226	0.5315	0.5226		0.5307	0.5519	0.5088
-1.47	0.4957	0.5104	0.4355		0.5421	0.464	0.486		0.5348	0.5641	0.5804		-1.47	0.5364	0.5267	0.5812		0.5478	0.4957	0.5519		0.5226	0.5307	0.5226		0.5307	0.5511	0.5096
-1.46	0.4965	0.5104	0.4355		0.5429	0.4632	0.4868		0.5348	0.5641	0.5804		-1.46	0.5364	0.5275	0.582		0.547	0.4965	0.5519		0.5234	0.5299	0.5234		0.5299	0.5511	0.5096
-1.45	0.4974	0.5104	0.4347		0.5438	0.4632	0.4884		0.534	0.5641	0.5812		-1.45	0.5372	0.5275	0.582		0.5478	0.4965	0.5527		0.5234	0.5299	0.5234		0.5299	0.5503	0.5104
-1.44	0.4982	0.5112	0.4355		0.5446	0.4624	0.49		0.534	0.5641	0.5812		-1.44	0.5372	0.5275	0.582		0.5478	0.4965	0.5535		0.5242	0.5299	0.5242		0.5315	0.5511	0.5096
-1.43	0.4982	0.5112	0.4363		0.5446	0.4624	0.4908		0.534	0.5649	0.5812		-1.43	0.5372	0.5275	0.582		0.5486	0.4949	0.5535		0.5234	0.5299	0.5234		0.5315	0.5511	0.5088
-1.42	0.4982	0.512	0.4371		0.5454	0.4624	0.4892		0.5348	0.5649	0.582		-1.42	0.5372	0.5275	0.582		0.5478	0.4941	0.5535		0.5242	0.5307	0.5226		0.5315	0.5519	0.5088
-1.41	0.4982	0.512	0.4371		0.5454	0.4615	0.4876		0.5348	0.5649	0.5828		-1.41	0.5372	0.5275	0.582		0.5478	0.4933	0.5535		0.5234	0.5315	0.5226		0.5307	0.5511	0.5088
-1.4	0.4982	0.5136	0.4363		0.5446	0.4615	0.486		0.5348	0.5641	0.5836		-1.4	0.5372	0.5275	0.5812		0.547	0.4941	0.5543		0.5242	0.5324	0.5226		0.5315	0.5519	0.5096
-1.39	0.4982	0.5136	0.4355		0.5429	0.4615	0.4868		0.5348	0.5641	0.5836		-1.39	0.5364	0.5275	0.582		0.547	0.4941	0.5535		0.5234	0.5324	0.5226		0.5324	0.5519	0.5096
-1.38	0.4982	0.5136	0.4347		0.5429	0.4632	0.4868		0.5348	0.5641	0.5836		-1.38	0.5356	0.5275	0.5828		0.5462	0.4949	0.5527		0.5234	0.5315	0.5218		0.5315	0.5535	0.5096
-1.37	0.4974	0.512	0.4347		0.5429	0.464	0.4868		0.5356	0.5641	0.5828		-1.37	0.5348	0.5283	0.5836		0.5462	0.4941	0.5519		0.5226	0.5315	0.5218		0.5299	0.5527	0.5088
-1.36	0.4974	0.512	0.4355		0.5438	0.4632	0.486		0.5356	0.5641	0.5828		-1.36	0.5356	0.5283	0.5836		0.5462	0.4949	0.5519		0.5226	0.5307	0.5226		0.5291	0.5527	0.5079
-1.35	0.4965	0.512	0.4363		0.5429	0.4624	0.486		0.5356	0.5641	0.582		-1.35	0.5372	0.5275	0.5836		0.547	0.4949	0.5519		0.5226	0.5315	0.5226		0.5291	0.5519	0.5088
-1.34	0.4965	0.5128	0.4371		0.5438	0.4615	0.486		0.5348	0.5649	0.5828		-1.34	0.5389	0.5267	0.5828		0.547	0.4949	0.5519		0.5226	0.5307	0.5218		0.5307	0.5519	0.5096
-1.33	0.4957	0.512	0.4363		0.5429	0.4624	0.4868		0.5348	0.5649	0.582		-1.33	0.5397	0.5258	0.5828		0.5478	0.4941	0.5519		0.5226	0.5315	0.5218		0.5307	0.5519	0.5096
-1.32	0.4957	0.5112	0.4355		0.5429	0.4632	0.4868		0.5348	0.5657	0.582		-1.32	0.5397	0.5258	0.582		0.5486	0.4941	0.5519		0.5226	0.5315	0.5218		0.5307	0.5527	0.5104
-1.31	0.4965	0.5104	0.4363		0.5429	0.464	0.4876		0.5348	0.5649	0.5804		-1.31	0.5389	0.525	0.582		0.5495	0.4949	0.5527		0.5226	0.5324	0.5226		0.5299	0.5535	0.5096
-1.3	0.4965	0.5096	0.4371		0.5438	0.464	0.4884		0.5348	0.5649	0.5804		-1.3	0.5372	0.5258	0.5812		0.5495	0.4957	0.5527		0.5226	0.5324	0.5226		0.5299	0.5535	0.5104
-1.29	0.4965	0.5104	0.4371		0.5446	0.464	0.4892		0.5348	0.5633	0.5804		-1.29	0.5364	0.5275	0.5812		0.5495	0.4957	0.5535		0.5226	0.5324	0.5218		0.5283	0.5527	0.5096
-1.28	0.4957	0.5096	0.4363		0.5446	0.464	0.4892		0.5348	0.5641	0.5812		-1.28	0.5356	0.5283	0.582		0.5495	0.4957	0.5543		0.5226	0.5324	0.5218		0.5291	0.5519	0.5112
-1.27	0.4957	0.5104	0.4363		0.5438	0.4648	0.4876		0.5356	0.5649	0.582		-1.27	0.5364	0.5291	0.582		0.5486	0.4949	0.556		0.5234	0.5324	0.5218		0.5299	0.5519	0.5112
-1.26	0.4957	0.5104	0.4363		0.5429	0.4656	0.4868		0.5356	0.5657	0.5828		-1.26	0.5356	0.5283	0.5828		0.5478	0.4941	0.556		0.5234	0.5324	0.5226		0.5315	0.5519	0.5112
-1.25	0.4957	0.5128	0.4355		0.5421	0.4656	0.486		0.5364	0.5641	0.5836		-1.25	0.5364	0.5283	0.582		0.547	0.4941	0.5551		0.5234	0.5315	0.5226		0.5307	0.5535	0.5104
-1.24	0.4965	0.5136	0.4347		0.5421	0.4656	0.4868		0.5364	0.5633	0.5836		-1.24	0.5364	0.5275	0.5828		0.5462	0.4949	0.5535		0.5226	0.5315	0.5226		0.5307	0.5535	0.5104
-1.23	0.4965	0.5136	0.4355		0.5421	0.4648	0.4876		0.5372	0.5633	0.5836		-1.23	0.5372	0.5275	0.5828		0.5454	0.4949	0.5527		0.5234	0.5315	0.5218		0.5307	0.5535	0.5104
-1.22	0.4974	0.5128	0.4355		0.5421	0.4648	0.4876		0.5381	0.5641	0.5836		-1.22	0.5372	0.5267	0.5836		0.5454	0.4949	0.5519		0.5242	0.5315	0.5218		0.5307	0.5519	0.5104
-1.21	0.4965	0.5128	0.4347		0.5421	0.464	0.4868		0.5372	0.5641	0.5828		-1.21	0.5372	0.5258	0.5828		0.5462	0.4949	0.5519		0.5242	0.5307	0.5218		0.5299	0.5519	0.5104
-1.2	0.4965	0.512	0.4339		0.5421	0.464	0.4868		0.5364	0.5641	0.582		-1.2	0.5372	0.5258	0.582		0.547	0.4957	0.5519		0.5234	0.5307	0.5226		0.5299	0.5543	0.5104
-1.19	0.4957	0.5112	0.4339		0.5429	0.464	0.4876		0.5348	0.5641	0.5812		-1.19	0.5364	0.5275	0.5812		0.547	0.4957	0.5527		0.5226	0.5315	0.5226		0.5307	0.5551	0.5096
-1.18	0.4957	0.5104	0.4347		0.5438	0.464	0.4876		0.5348	0.5649	0.5812		-1.18	0.5364	0.5283	0.5812		0.5462	0.4957	0.5535		0.5234	0.5324	0.5226		0.5307	0.556	0.5096
-1.17	0.4965	0.5104	0.4347		0.5446	0.464	0.4868		0.5356	0.5649	0.5812		-1.17	0.5364	0.5275	0.5812		0.5462	0.4957	0.5535		0.5242	0.5315	0.5234		0.5307	0.5543	0.5104
-1.16	0.4965	0.5104	0.4347		0.5438	0.464	0.486		0.5356	0.5665	0.582		-1.16	0.5381	0.5267	0.5812		0.5462	0.4957	0.5527		0.5242	0.5315	0.5242		0.5307	0.5543	0.5112
-1.15	0.4974	0.5112	0.4347		0.5438	0.4648	0.486		0.5356	0.5674	0.582		-1.15	0.5381	0.5258	0.582		0.5462	0.4965	0.5527		0.5234	0.5315	0.5242		0.5315	0.5551	0.5112
-1.14	0.4974	0.5112	0.4347		0.5429	0.4648	0.486		0.5348	0.5674	0.582		-1.14	0.5381	0.5258	0.5828		0.5454	0.4974	0.5543		0.5226	0.5324	0.5234		0.5299	0.5543	0.5104
-1.13	0.4982	0.5112	0.4339		0.5429	0.4656	0.486		0.5348	0.5665	0.5812		-1.13	0.5364	0.5258	0.5828		0.5446	0.499	0.556		0.5234	0.5315	0.5226		0.5299	0.5535	0.5096
-1.12	0.499	0.5104	0.4339		0.5421	0.4648	0.486		0.5356	0.5657	0.582		-1.12	0.5332	0.5275	0.582		0.5446	0.4974	0.5551		0.5234	0.5315	0.5226		0.5299	0.5519	0.5088
-1.11	0.499	0.5112	0.4347		0.5413	0.4648	0.486		0.5356	0.5657	0.5828		-1.11	0.5324	0.5283	0.582		0.5446	0.4965	0.5535		0.5234	0.5315	0.5218		0.5315	0.5519	0.5088
-1.1	0.499	0.5128	0.4355		0.5421	0.4648	0.486		0.5364	0.5649	0.5828		-1.1	0.5324	0.5283	0.582		0.5446	0.4949	0.5519		0.5234	0.5324	0.521		0.5299	0.5527	0.5096
-1.09	0.4982	0.5136	0.4355		0.5421	0.4648	0.486		0.5364	0.5641	0.582		-1.09	0.5348	0.5275	0.5828		0.5446	0.4965	0.5527		0.5242	0.5315	0.5201		0.5299	0.5527	0.5104
-1.08	0.4974	0.5136	0.4347		0.5421	0.464	0.486		0.5372	0.5641	0.5812		-1.08	0.5356	0.5275	0.5828		0.5446	0.4965	0.5535		0.525	0.5315	0.5201		0.5299	0.5527	0.5104
-1.07	0.499	0.512	0.4347		0.5413	0.4632	0.486		0.5372	0.5641	0.5812		-1.07	0.5356	0.5291	0.5836		0.5454	0.4965	0.5535		0.525	0.5307	0.521		0.5307	0.5519	0.5096
-1.06	0.4998	0.5112	0.4347		0.5405	0.4632	0.486		0.5372	0.5641	0.5812		-1.06	0.5364	0.5307	0.5836		0.5454	0.4957	0.5535		0.525	0.5307	0.521		0.5299	0.5519	0.5112
-1.05	0.5014	0.5104	0.4347		0.5413	0.464	0.486		0.5372	0.5641	0.5804		-1.05	0.5372	0.5315	0.5836		0.5462	0.4957	0.5535		0.5242	0.5307	0.521		0.5299	0.5543	0.5112
-1.04	0.4998	0.5104	0.4347		0.5421	0.4632	0.4868		0.5364	0.5641	0.5804		-1.04	0.5389	0.5307	0.5836		0.5462	0.4965	0.5535		0.5242	0.5315	0.521		0.5315	0.5551	0.5128
-1.03	0.4998	0.5112	0.4347		0.5438	0.4624	0.4868		0.5356	0.5649	0.5804		-1.03	0.5397	0.5299	0.5836		0.5462	0.4965	0.5527		0.5242	0.5315	0.5226		0.5315	0.556	0.512
-1.02	0.4998	0.512	0.4355		0.5438	0.4624	0.4876		0.5364	0.5657	0.5812		-1.02	0.5413	0.5299	0.5828		0.5462	0.4965	0.5519		0.525	0.5315	0.5242		0.5324	0.5543	0.512
-1.01	0.499	0.512	0.4371		0.5429	0.4632	0.4868		0.5364	0.5674	0.5804		-1.01	0.5405	0.5291	0.582		0.5454	0.4965	0.5527		0.525	0.5315	0.525		0.5315	0.5543	0.512
-1	0.4982	0.5112	0.4379		0.5421	0.464	0.4868		0.5364	0.5674	0.5804		-1	0.5389	0.5291	0.5812		0.5462	0.4974	0.5535		0.5242	0.5324	0.5242		0.5315	0.5535	0.5112
-0.99	0.4974	0.5104	0.4387		0.5429	0.4648	0.486		0.5348	0.5674	0.5804		-0.99	0.5364	0.5283	0.582		0.5462	0.4998	0.5543		0.5242	0.5324	0.5234		0.5299	0.5527	0.5104
-0.98	0.4982	0.5104	0.4371		0.5421	0.4656	0.486		0.5348	0.5657	0.5812		-0.98	0.5364	0.5291	0.5828		0.5462	0.499	0.5543		0.5242	0.5324	0.5226		0.5299	0.5519	0.5088
-0.97	0.499	0.5112	0.4363		0.5421	0.4664	0.4868		0.5348	0.5649	0.5812		-0.97	0.5429	0.5275	0.5836		0.5454	0.4982	0.5535		0.5242	0.5324	0.5226		0.5307	0.5519	0.5088
-0.96	0.499	0.512	0.4347		0.5421	0.4656	0.4876		0.5348	0.5641	0.582		-0.96	0.5429	0.5283	0.5828		0.5446	0.4949	0.5527		0.5242	0.5332	0.5234		0.5315	0.5519	0.5104
-0.95	0.4982	0.5128	0.4347		0.5438	0.4648	0.4884		0.5348	0.5641	0.5828		-0.95	0.5429	0.5283	0.5828		0.5446	0.4949	0.5519		0.5234	0.534	0.5234		0.5307	0.5527	0.5112
-0.94	0.4982	0.5136	0.4347		0.5446	0.464	0.4884		0.5348	0.5649	0.5836		-0.94	0.5372	0.5291	0.5828		0.5454	0.4957	0.5519		0.5234	0.5348	0.5234		0.5307	0.5527	0.5112
-0.93	0.499	0.5136	0.4347		0.5446	0.464	0.4876		0.5356	0.5649	0.5828		-0.93	0.5372	0.5283	0.5836		0.547	0.4957	0.5527		0.5242	0.534	0.5218		0.5307	0.5527	0.5112
-0.92	0.5022	0.5136	0.4347		0.5438	0.464	0.4876		0.5364	0.5649	0.582		-0.92	0.5438	0.5275	0.5836		0.5478	0.4957	0.5519		0.525	0.5332	0.5218		0.5307	0.5519	0.512
-0.91	0.5022	0.512	0.4347		0.5421	0.464	0.4876		0.5381	0.5641	0.582		-0.91	0.5438	0.5283	0.5836		0.5478	0.4949	0.5519		0.5258	0.5324	0.5218		0.5299	0.5527	0.512
-0.9	0.5014	0.5112	0.4347		0.5413	0.4632	0.4884		0.5372	0.5641	0.582		-0.9	0.5438	0.5291	0.5836		0.547	0.4957	0.5519		0.5242	0.5324	0.5226		0.5307	0.5551	0.5104
-0.89	0.4982	0.5112	0.4355		0.5413	0.4632	0.4876		0.5364	0.5641	0.582		-0.89	0.5372	0.5299	0.5836		0.547	0.4957	0.5527		0.5234	0.5324	0.5226		0.5315	0.556	0.5096
-0.88	0.4974	0.5112	0.4363		0.5429	0.4624	0.4876		0.534	0.5649	0.5812		-0.88	0.5372	0.5299	0.5836		0.5478	0.4957	0.5535		0.5242	0.5315	0.5234		0.5315	0.5551	0.5088
-0.87	0.4982	0.5112	0.4371		0.5438	0.4624	0.4876		0.534	0.5657	0.5812		-0.87	0.5413	0.5291	0.5836		0.5486	0.4957	0.5535		0.525	0.5315	0.5242		0.5307	0.5527	0.5096
-0.86	0.4982	0.5104	0.4371		0.5446	0.4624	0.4876		0.534	0.5674	0.5812		-0.86	0.5413	0.5283	0.5836		0.5495	0.4957	0.5535		0.5258	0.5315	0.5258		0.5299	0.5519	0.5104
-0.85	0.4982	0.5104	0.4363		0.5438	0.4632	0.4876		0.5348	0.5674	0.582		-0.85	0.5413	0.5275	0.5828		0.5478	0.4965	0.5535		0.5242	0.5315	0.525		0.5299	0.5535	0.5104
-0.84	0.4974	0.5112	0.4355		0.5429	0.4648	0.4884		0.5348	0.5674	0.582		-0.84	0.5372	0.5275	0.5828		0.5462	0.4974	0.5535		0.5242	0.5315	0.525		0.5291	0.5535	0.5096
-0.83	0.4982	0.512	0.4347		0.5429	0.4656	0.49		0.5348	0.5657	0.5828		-0.83	0.5372	0.5275	0.5828		0.5446	0.4974	0.5551		0.5234	0.5315	0.5234		0.5299	0.5535	0.5088
-0.82	0.4982	0.5128	0.4347		0.5446	0.4656	0.4908		0.5356	0.5649	0.582		-0.82	0.5438	0.5275	0.5828		0.5454	0.4965	0.5551		0.5242	0.5324	0.5226		0.5307	0.5519	0.5096
-0.81	0.4982	0.5128	0.4347		0.5446	0.464	0.49		0.5364	0.5641	0.582		-0.81	0.5438	0.5275	0.5828		0.5462	0.4949	0.5551		0.5242	0.5324	0.5218		0.5324	0.5519	0.5096
-0.8	0.4974	0.512	0.4347		0.5446	0.4624	0.4892		0.5364	0.5641	0.5812		-0.8	0.5438	0.5275	0.5828		0.547	0.4941	0.5535		0.5242	0.5332	0.5218		0.5324	0.5527	0.5096
-0.79	0.4974	0.512	0.4347		0.5438	0.4624	0.4884		0.5348	0.5641	0.5804		-0.79	0.5372	0.5283	0.5836		0.547	0.4941	0.5511		0.5242	0.534	0.5226		0.5324	0.5527	0.5112
-0.78	0.4982	0.5112	0.4347		0.5446	0.4624	0.4876		0.534	0.5649	0.5804		-0.78	0.5372	0.5291	0.5836		0.547	0.4949	0.5503		0.5234	0.534	0.5226		0.5307	0.5527	0.5128
-0.77	0.499	0.5112	0.4347		0.5438	0.4632	0.4868		0.534	0.5649	0.5796		-0.77	0.5372	0.5299	0.5836		0.547	0.4957	0.5503		0.5242	0.5324	0.5218		0.5291	0.5527	0.5136
-0.76	0.499	0.5104	0.4355		0.5429	0.4624	0.4868		0.5364	0.5649	0.5796		-0.76	0.5381	0.5291	0.5828		0.5511	0.4957	0.5519		0.5242	0.5307	0.5218		0.5275	0.5535	0.512
-0.75	0.4974	0.5104	0.4363		0.5421	0.4632	0.4876		0.5356	0.5641	0.5796		-0.75	0.5397	0.5283	0.5828		0.5511	0.4957	0.5527		0.525	0.5307	0.5218		0.5275	0.5543	0.5104
-0.74	0.4974	0.5096	0.4363		0.5421	0.4632	0.4884		0.5356	0.5641	0.5804		-0.74	0.5405	0.5283	0.5828		0.5511	0.4949	0.5527		0.525	0.5315	0.5226		0.5258	0.5543	0.5096
-0.73	0.4974	0.5096	0.4355		0.5421	0.464	0.4884		0.534	0.5649	0.5812		-0.73	0.5405	0.5291	0.5836		0.5478	0.4949	0.5527		0.5242	0.5315	0.5226		0.5267	0.5543	0.5104
-0.72	0.4982	0.5096	0.4347		0.5421	0.464	0.4884		0.5348	0.5657	0.5812		-0.72	0.5429	0.5291	0.5836		0.5486	0.4949	0.5519		0.5234	0.5307	0.5226		0.5275	0.5543	0.5112
-0.71	0.4982	0.5104	0.4347		0.5429	0.464	0.4884		0.534	0.5665	0.582		-0.71	0.5421	0.5283	0.5836		0.5503	0.4949	0.5519		0.5226	0.5315	0.5218		0.5299	0.5543	0.5112
-0.7	0.4974	0.5112	0.4347		0.5438	0.464	0.4892		0.5332	0.5657	0.5828		-0.7	0.5421	0.5275	0.5836		0.5486	0.4941	0.5519		0.5226	0.5324	0.5218		0.5299	0.5543	0.5104
-0.69	0.4965	0.5112	0.4347		0.5446	0.464	0.4892		0.5332	0.5649	0.5828		-0.69	0.5381	0.5275	0.5836		0.547	0.4933	0.5519		0.5226	0.5332	0.5218		0.5291	0.5535	0.5104
-0.68	0.4957	0.512	0.4347		0.5446	0.464	0.4892		0.534	0.5641	0.582		-0.68	0.5381	0.5275	0.5836		0.5454	0.4933	0.5519		0.5226	0.5324	0.5226		0.5299	0.5527	0.5104
-0.67	0.4965	0.5112	0.4347		0.5446	0.464	0.4884		0.5348	0.5641	0.5812		-0.67	0.5438	0.5275	0.5828		0.5462	0.4933	0.5519		0.5234	0.5324	0.5218		0.5299	0.5519	0.5104
-0.66	0.4974	0.512	0.4347		0.5446	0.4632	0.4884		0.5348	0.5641	0.5812		-0.66	0.5438	0.5275	0.5828		0.547	0.4933	0.5519		0.5234	0.5324	0.521		0.5307	0.5519	0.5104
-0.65	0.4982	0.512	0.4347		0.5446	0.4624	0.4884		0.534	0.5641	0.582		-0.65	0.5438	0.5275	0.5828		0.547	0.4933	0.5527		0.5234	0.534	0.521		0.5299	0.5519	0.5112
-0.64	0.4982	0.5128	0.4347		0.5446	0.4624	0.4876		0.534	0.5641	0.5828		-0.64	0.5372	0.5283	0.5836		0.547	0.4941	0.5511		0.5226	0.5348	0.5218		0.5283	0.5527	0.512
-0.63	0.4974	0.5128	0.4347		0.5446	0.4632	0.4868		0.534	0.5641	0.5836		-0.63	0.5372	0.5291	0.5836		0.547	0.4941	0.5511		0.5234	0.5356	0.5218		0.5275	0.5527	0.5136
-0.62	0.499	0.5128	0.4347		0.5438	0.464	0.486		0.534	0.5641	0.5828		-0.62	0.5364	0.5299	0.5836		0.547	0.4949	0.5511		0.5242	0.5348	0.5218		0.5275	0.5527	0.5136
-0.61	0.499	0.5128	0.4347		0.5429	0.4632	0.486		0.5348	0.5641	0.5828		-0.61	0.5364	0.5299	0.5836		0.547	0.4949	0.5527		0.5242	0.534	0.5218		0.5299	0.5519	0.5136
-0.6	0.4998	0.5128	0.4347		0.5429	0.4632	0.486		0.534	0.5641	0.5828		-0.6	0.5372	0.5299	0.5836		0.547	0.4957	0.5527		0.5234	0.5332	0.5226		0.5299	0.5519	0.5128
-0.59	0.4974	0.512	0.4347		0.5429	0.4632	0.486		0.5348	0.5641	0.5828		-0.59	0.5389	0.5291	0.5836		0.547	0.4957	0.5527		0.5226	0.5324	0.5226		0.5299	0.5519	0.512
-0.58	0.4974	0.5112	0.4347		0.5429	0.464	0.486		0.534	0.5641	0.582		-0.58	0.5397	0.5291	0.5828		0.5478	0.4949	0.5527		0.5226	0.5315	0.5226		0.5283	0.5519	0.5112
-0.57	0.4965	0.5104	0.4347		0.5421	0.464	0.486		0.5324	0.5641	0.5812		-0.57	0.5429	0.5291	0.582		0.5486	0.4949	0.5527		0.5234	0.5315	0.5218		0.5291	0.5519	0.5104
-0.56	0.4974	0.5104	0.4339		0.5429	0.464	0.4868		0.5332	0.5641	0.5812		-0.56	0.5421	0.5283	0.582		0.5486	0.4949	0.5519		0.5234	0.5315	0.5218		0.5291	0.5519	0.5104
-0.55	0.4974	0.5112	0.4339		0.5438	0.464	0.4884		0.5332	0.5641	0.5812		-0.55	0.5413	0.5275	0.5828		0.5478	0.4957	0.5527		0.5234	0.5324	0.521		0.5307	0.5527	0.5104
-0.54	0.4982	0.512	0.4339		0.5454	0.464	0.49		0.5356	0.5633	0.5812		-0.54	0.5372	0.5267	0.5836		0.547	0.4957	0.5543		0.5226	0.5324	0.5218		0.5307	0.5527	0.5104
-0.53	0.4982	0.5128	0.4339		0.5462	0.464	0.49		0.5348	0.5633	0.5812		-0.53	0.5364	0.5275	0.5836		0.547	0.4949	0.5551		0.5226	0.5324	0.521		0.5299	0.5527	0.5096
-0.52	0.499	0.512	0.4339		0.5462	0.464	0.4892		0.5356	0.5633	0.582		-0.52	0.5348	0.5275	0.5836		0.547	0.4941	0.5551		0.5234	0.5324	0.521		0.5291	0.5519	0.5096
-0.51	0.499	0.5112	0.4339		0.5446	0.464	0.4884		0.5356	0.5641	0.5828		-0.51	0.534	0.5275	0.5836		0.5462	0.4941	0.5543		0.5234	0.5324	0.521		0.5291	0.5519	0.5096
-0.5	0.499	0.512	0.4347		0.5438	0.4632	0.4876		0.5356	0.5641	0.5836		-0.5	0.534	0.5275	0.5836		0.5454	0.4949	0.5543		0.5234	0.5332	0.521		0.5299	0.5527	0.5112
-0.49	0.4982	0.5128	0.4347		0.5438	0.4632	0.4868		0.5348	0.5641	0.5828		-0.49	0.5356	0.5275	0.5836		0.5454	0.4957	0.5543		0.5226	0.534	0.521		0.5291	0.5527	0.512
-0.48	0.4974	0.5136	0.4347		0.5446	0.4632	0.486		0.534	0.5641	0.582		-0.48	0.5364	0.5283	0.5836		0.5454	0.4957	0.5543		0.5226	0.534	0.521		0.5283	0.5527	0.512
-0.47	0.4974	0.5128	0.4347		0.5446	0.4632	0.486		0.5348	0.5641	0.5812		-0.47	0.5364	0.5299	0.5828		0.5454	0.4957	0.5535		0.5234	0.5324	0.5218		0.5283	0.5519	0.5104
-0.46	0.4974	0.5128	0.4347		0.5438	0.4632	0.486		0.5348	0.5641	0.582		-0.46	0.5364	0.5315	0.582		0.5446	0.4949	0.5527		0.5234	0.5307	0.5226		0.5299	0.5519	0.5088
-0.45	0.4982	0.512	0.4347		0.5429	0.4632	0.486		0.5356	0.5641	0.582		-0.45	0.5372	0.5315	0.5812		0.5454	0.4949	0.5519		0.5242	0.5307	0.5226		0.5315	0.5511	0.5088
-0.44	0.4974	0.5112	0.4355		0.5421	0.464	0.486		0.5348	0.5641	0.582		-0.44	0.5381	0.5291	0.582		0.5454	0.4949	0.5519		0.5242	0.5315	0.5226		0.5315	0.5511	0.5096
-0.43	0.4974	0.5104	0.4355		0.5421	0.464	0.486		0.5348	0.5649	0.5812		-0.43	0.5381	0.5275	0.5828		0.5462	0.4957	0.5519		0.525	0.5324	0.5218		0.5307	0.5503	0.5096
-0.42	0.4974	0.5104	0.4355		0.5421	0.464	0.4868		0.5348	0.5649	0.5812		-0.42	0.5364	0.5267	0.5828		0.547	0.4957	0.5519		0.525	0.5315	0.5218		0.5299	0.5511	0.5096
-0.41	0.4982	0.5112	0.4363		0.5429	0.464	0.4876		0.5348	0.5649	0.5812		-0.41	0.5356	0.5275	0.582		0.5486	0.4965	0.5519		0.525	0.5307	0.5218		0.5299	0.5511	0.5096
-0.4	0.4974	0.5104	0.4371		0.5438	0.464	0.4892		0.5356	0.5641	0.5812		-0.4	0.5356	0.5275	0.582		0.5486	0.4965	0.5519		0.5242	0.5307	0.5218		0.5307	0.5511	0.5104
-0.39	0.4974	0.5104	0.4379		0.5454	0.4632	0.4876		0.5356	0.5641	0.5804		-0.39	0.5364	0.5283	0.5828		0.5478	0.4965	0.5527		0.5242	0.5315	0.5218		0.5307	0.5503	0.5104
-0.38	0.4974	0.5096	0.4371		0.5446	0.4632	0.4868		0.5356	0.5649	0.5804		-0.38	0.5372	0.5275	0.5836		0.5462	0.4949	0.5527		0.5234	0.5324	0.521		0.5315	0.5503	0.5104
-0.37	0.4982	0.5112	0.4371		0.5438	0.4624	0.4851		0.5356	0.5657	0.5804		-0.37	0.5364	0.5275	0.5836		0.5454	0.4949	0.5527		0.5242	0.5324	0.521		0.5307	0.5511	0.5104
-0.36	0.4982	0.512	0.4371		0.5421	0.4632	0.486		0.5364	0.5665	0.582		-0.36	0.5364	0.5267	0.5828		0.5454	0.4957	0.5519		0.5242	0.5332	0.5201		0.5324	0.5519	0.5104
-0.35	0.4982	0.5128	0.4363		0.5421	0.4632	0.486		0.5372	0.5657	0.5828		-0.35	0.5356	0.5275	0.5828		0.5462	0.4965	0.5527		0.525	0.534	0.5201		0.5324	0.5519	0.5104
-0.34	0.4974	0.5136	0.4355		0.5421	0.464	0.486		0.5372	0.5657	0.5836		-0.34	0.5372	0.5275	0.5828		0.5462	0.4965	0.5535		0.525	0.5332	0.5201		0.5332	0.5519	0.5104
-0.33	0.4974	0.5136	0.4347		0.5421	0.464	0.486		0.5364	0.5649	0.5836		-0.33	0.5372	0.5275	0.5836		0.5454	0.4949	0.5535		0.525	0.5324	0.5201		0.5315	0.5519	0.5112
-0.32	0.4974	0.5144	0.4347		0.5421	0.4632	0.4868		0.5372	0.5657	0.5828		-0.32	0.5389	0.5275	0.5828		0.5446	0.4941	0.5535		0.525	0.5315	0.521		0.5315	0.5519	0.5112
-0.31	0.4982	0.5136	0.4355		0.5429	0.4632	0.4876		0.5372	0.5649	0.582		-0.31	0.5389	0.5275	0.582		0.5454	0.4933	0.5527		0.5242	0.5315	0.5218		0.5315	0.5519	0.512
-0.3	0.4974	0.5128	0.4363		0.5429	0.4632	0.4876		0.5381	0.5649	0.5812		-0.3	0.5389	0.5275	0.5812		0.5462	0.4941	0.5527		0.5234	0.5307	0.5226		0.5315	0.5511	0.5112
-0.29	0.4965	0.5112	0.4363		0.5429	0.464	0.4868		0.5364	0.5649	0.5812		-0.29	0.5381	0.5275	0.582		0.5478	0.4949	0.5527		0.5226	0.5299	0.5218		0.5307	0.5511	0.5112
-0.28	0.4957	0.5104	0.4363		0.5429	0.464	0.486		0.5348	0.5649	0.5812		-0.28	0.5364	0.5283	0.5828		0.5478	0.4957	0.5535		0.5226	0.5299	0.5218		0.5299	0.5511	0.5096
-0.27	0.4957	0.5104	0.4363		0.5429	0.464	0.4868		0.5348	0.5649	0.5804		-0.27	0.5364	0.5291	0.5828		0.5486	0.4957	0.5543		0.5234	0.5307	0.5226		0.5299	0.5519	0.5096
-0.26	0.4957	0.5104	0.4379		0.5429	0.464	0.4876		0.5348	0.5649	0.5796		-0.26	0.5356	0.5299	0.5828		0.5486	0.4965	0.5535		0.5234	0.5315	0.5242		0.5299	0.5519	0.5096
-0.25	0.4965	0.5096	0.4379		0.5429	0.4648	0.4876		0.5356	0.5657	0.5796		-0.25	0.5364	0.5291	0.5828		0.5486	0.4974	0.5527		0.5234	0.5324	0.525		0.5299	0.5519	0.5104
-0.24	0.4974	0.5096	0.4387		0.5429	0.4656	0.4876		0.5348	0.5665	0.5812		-0.24	0.5364	0.5283	0.5836		0.5478	0.4974	0.5519		0.5234	0.5324	0.5242		0.5307	0.5519	0.5104
-0.23	0.4982	0.5104	0.4371		0.5429	0.4656	0.4868		0.5348	0.5665	0.5828		-0.23	0.5372	0.5275	0.5836		0.547	0.4957	0.5519		0.5242	0.5324	0.5234		0.5299	0.5519	0.5096
-0.22	0.499	0.5112	0.4371		0.5421	0.4648	0.4868		0.5364	0.5665	0.5836		-0.22	0.5372	0.5275	0.5836		0.547	0.4949	0.5519		0.525	0.5324	0.5226		0.5291	0.5519	0.5088
-0.21	0.499	0.512	0.4355		0.5421	0.464	0.486		0.5372	0.5657	0.5836		-0.21	0.5372	0.5275	0.5836		0.547	0.4957	0.5519		0.525	0.5324	0.5218		0.5275	0.5519	0.5079
-0.2	0.499	0.5112	0.4355		0.5421	0.464	0.4868		0.5381	0.5625	0.5836		-0.2	0.5372	0.5275	0.5836		0.5462	0.4965	0.5519		0.5242	0.5332	0.5218		0.5283	0.5519	0.5088
-0.19	0.4974	0.5112	0.4347		0.5421	0.4632	0.4876		0.5372	0.5617	0.5836		-0.19	0.5372	0.5291	0.5836		0.5462	0.4957	0.5519		0.5234	0.5332	0.5218		0.5283	0.5519	0.5096
-0.18	0.4965	0.5112	0.4347		0.5421	0.4624	0.4884		0.5364	0.5617	0.5828		-0.18	0.5372	0.5291	0.5836		0.5454	0.4941	0.5519		0.5234	0.5324	0.5226		0.5291	0.5519	0.5104
-0.17	0.4965	0.512	0.4347		0.5421	0.4615	0.4876		0.5372	0.5649	0.582		-0.17	0.5389	0.5291	0.5845		0.5454	0.4933	0.5519		0.5242	0.5307	0.5226		0.5291	0.5519	0.5104
-0.16	0.4974	0.5128	0.4347		0.5413	0.4624	0.4876		0.5372	0.5649	0.5812		-0.16	0.5397	0.5283	0.5836		0.5446	0.4941	0.5519		0.525	0.5299	0.5226		0.5299	0.5519	0.5104
-0.15	0.4974	0.5112	0.4347		0.5421	0.4632	0.4876		0.5372	0.5649	0.5812		-0.15	0.5405	0.5291	0.5845		0.5454	0.4941	0.5519		0.525	0.5307	0.5226		0.5299	0.5511	0.5104
-0.14	0.4974	0.5104	0.4355		0.5421	0.464	0.4884		0.5356	0.5641	0.582		-0.14	0.5397	0.5299	0.5836		0.5454	0.4949	0.5519		0.525	0.5315	0.5234		0.5299	0.5511	0.5104
-0.13	0.4974	0.5088	0.4355		0.5438	0.464	0.4884		0.5348	0.5649	0.5812		-0.13	0.5397	0.5291	0.5845		0.5462	0.4933	0.5519		0.525	0.5332	0.5242		0.5299	0.5511	0.5096
-0.12	0.4982	0.5096	0.4355		0.5438	0.464	0.4884		0.5364	0.5665	0.5812		-0.12	0.5381	0.5291	0.5836		0.5462	0.4941	0.5519		0.525	0.5332	0.525		0.5299	0.5527	0.5096
-0.11	0.4982	0.5088	0.4363		0.5438	0.464	0.4884		0.5364	0.5674	0.5796		-0.11	0.5372	0.5283	0.5836		0.5462	0.4941	0.5527		0.525	0.5332	0.5242		0.5299	0.5535	0.5088
-0.1	0.4982	0.5088	0.4371		0.5429	0.4648	0.4876		0.5364	0.5665	0.5804		-0.1	0.5364	0.5283	0.5836		0.5462	0.4965	0.5535		0.5242	0.5324	0.5234		0.5299	0.5527	0.5096
-0.09	0.4892	0.5096	0.4274		0.534	0.464	0.4974		0.5275	0.56	0.5722		-0.09	0.5413	0.5283	0.5779		0.5421	0.4965	0.547		0.5128	0.5332	0.5234		0.5283	0.5495	0.5128
-0.08	0.4713	0.5153	0.4168		0.5258	0.4664	0.4998		0.5153	0.5551	0.5584		-0.08	0.5405	0.5193	0.5641		0.5381	0.5063	0.5348		0.5088	0.5307	0.5275		0.5299	0.5429	0.5161
-0.07	0.4542	0.5144	0.4078		0.5071	0.4681	0.5039		0.5169	0.5576	0.5405		-0.07	0.5446	0.5161	0.5649		0.5462	0.5153	0.5218		0.5014	0.5193	0.5348		0.5372	0.5397	0.5291
-0.06	0.4526	0.5185	0.4143		0.5031	0.4746	0.4933		0.5161	0.5641	0.5348		-0.06	0.5454	0.5201	0.5633		0.5527	0.5234	0.5128		0.5006	0.5047	0.5413		0.5364	0.5372	0.5299
-0.05	0.4624	0.5096	0.4168		0.5022	0.4827	0.4868		0.5315	0.5519	0.5332		-0.05	0.5429	0.5234	0.5763		0.5519	0.5226	0.5096		0.4851	0.486	0.5348		0.5421	0.534	0.5291
-0.04	0.4615	0.5144	0.4135		0.512	0.4819	0.4868		0.525	0.5486	0.547		-0.04	0.5405	0.5324	0.5722		0.534	0.5104	0.5022		0.4933	0.4835	0.5332		0.5429	0.5389	0.5201
-0.03	0.4542	0.5071	0.4192		0.5128	0.4754	0.4925		0.5397	0.5446	0.5438		-0.03	0.534	0.5413	0.5853		0.5291	0.5144	0.5055		0.5047	0.4827	0.5332		0.547	0.5356	0.521
-0.02	0.4485	0.499	0.4168		0.5144	0.4689	0.5031		0.5283	0.5568	0.5495		-0.02	0.5429	0.5568	0.5836		0.5413	0.5169	0.5022		0.5144	0.5112	0.5258		0.5454	0.5356	0.5332
-0.01	0.4534	0.4892	0.4322		0.512	0.4868	0.5063		0.5291	0.5592	0.5348		-0.01	0.5519	0.5633	0.5796		0.5584	0.521	0.5088		0.4949	0.5307	0.521		0.5405	0.5267	0.5332
0	0.4583	0.486	0.4339		0.5144	0.5071	0.5096		0.5185	0.5633	0.5332		0	0.5633	0.5625	0.5657		0.5682	0.5096	0.5096		0.4762	0.5511	0.5177		0.5438	0.5258	0.5307
0.01	0.4591	0.4925	0.4477		0.5128	0.5226	0.5112		0.5226	0.569	0.525		0.01	0.5674	0.5657	0.5608		0.5698	0.5006	0.5169		0.4672	0.5495	0.5315		0.5429	0.5258	0.5193
0.02	0.4746	0.5047	0.4477		0.5299	0.5169	0.5234		0.5315	0.5722	0.534		0.02	0.5804	0.5747	0.5625		0.5714	0.525	0.5258		0.4819	0.5429	0.5315		0.5486	0.5429	0.5315
0.03	0.49	0.5193	0.4387		0.5633	0.5161	0.534		0.56	0.5747	0.5535		0.03	0.595	0.5918	0.5731		0.5771	0.5486	0.5446		0.5096	0.5454	0.5332		0.5641	0.5625	0.5495
0.04	0.5071	0.5421	0.4518		0.5877	0.5088	0.5568		0.5796	0.5991	0.5869		0.04	0.6227	0.6015	0.5861		0.5885	0.5674	0.5649		0.5454	0.5617	0.5495		0.5869	0.5902	0.5763
0.05	0.5079	0.5641	0.4721		0.6032	0.5112	0.5788		0.5804	0.6219	0.6186		0.05	0.6471	0.6186	0.6121		0.6007	0.5739	0.582		0.5714	0.5918	0.5958		0.6243	0.6056	0.5885
0.06	0.5275	0.5845	0.5071		0.6178	0.5348	0.6081		0.5779	0.6618	0.6463		0.06	0.6772	0.6309	0.6349		0.626	0.5967	0.5999		0.591	0.6252	0.6569		0.6496	0.6227	0.5999
0.07	0.5568	0.6154	0.5242		0.6496	0.5763	0.6349		0.6024	0.7017	0.6756		0.07	0.6976	0.674	0.674		0.6545	0.6292	0.6349		0.6203	0.6496	0.7074		0.6683	0.6447	0.6227
0.08	0.5934	0.6439	0.5543		0.6895	0.6048	0.6683		0.6488	0.7391	0.7041		0.08	0.735	0.7293	0.7155		0.6992	0.6724	0.6813		0.6634	0.674	0.744		0.7017	0.6691	0.661
0.09	0.6195	0.687	0.595		0.7228	0.6219	0.7		0.6968	0.7733	0.7383		0.09	0.7676	0.7863	0.7603		0.7416	0.722	0.7277		0.7131	0.7106	0.7757		0.7383	0.7049	0.7082
0.1	0.6455	0.7179	0.6357		0.7619	0.6439	0.7245		0.7326	0.8002	0.7863		0.1	0.8189	0.8368	0.8034		0.7823	0.7513	0.753		0.7326	0.7497	0.8221		0.7863	0.7253	0.7432
0.11	0.6813	0.7489	0.6659		0.7985	0.6919	0.7538		0.7774	0.8352	0.8254		0.11	0.8441	0.8685	0.8474		0.8148	0.7814	0.7684		0.7652	0.7953	0.8596		0.8156	0.7562	0.7757
0.12	0.7204	0.7749	0.6862		0.8197	0.731	0.779		0.8018	0.8645	0.8734		0.12	0.8921	0.9076	0.9003		0.84	0.8059	0.7896		0.7945	0.8221	0.9011		0.8653	0.7831	0.8173
0.13	0.7538	0.8205	0.7261		0.8449	0.7603	0.8221		0.8335	0.893	0.8905		0.13	0.9304	0.9516	0.9385		0.8645	0.8604	0.8311		0.8417	0.8628	0.941		0.9027	0.8181	0.8637
0.14	0.7823	0.8588	0.7652		0.849	0.7782	0.8278		0.8563	0.9288	0.9239		0.14	0.9646	0.9849	0.9548		0.8824	0.8978	0.8734		0.858	0.9027	0.9776		0.9345	0.8368	0.906
0.15	0.8091	0.9003	0.8034		0.8759	0.7961	0.8563		0.8816	0.9744	0.9483		0.15	0.9882	1.0151	0.9719		0.9084	0.9182	0.9003		0.8889	0.9459	0.9972		0.9418	0.8563	0.9239
0.16	0.8352	0.9247	0.8335		0.8816	0.8164	0.8628		0.906	1.0167	0.9849		0.16	1.0126	1.0224	0.9906		0.9442	0.9377	0.9166		0.9239	0.976	1.0256		0.9711	0.8864	0.9296
0.17	0.8571	0.9581	0.8596		0.9214	0.8433	0.897		0.9369	1.0387	1.0102		0.17	1.033	1.0501	1.033		0.9752	0.9646	0.9361		0.9613	1.0045	1.0525		0.9955	0.9117	0.9394
0.18	0.884	0.9882	0.8751		0.9353	0.8645	0.9052		0.9524	1.0582	1.0427		0.18	1.0476	1.0761	1.0533		1.0028	1.002	0.9605		0.9915	1.0452	1.0834		1.0305	0.9304	0.9605
0.19	0.9027	1.0085	0.8791		0.9719	0.8783	0.9158		0.9752	1.0712	1.0549		0.19	1.0582	1.1054	1.081		1.0118	1.0273	0.9792		1.0232	1.0688	1.094		1.046	0.9369	0.9882
0.2	0.932	1.033	0.893		0.9784	0.8921	0.9223		0.9735	1.0924	1.0745		0.2	1.0769	1.1233	1.0916		1.033	1.0444	1.0061		1.0501	1.0794	1.1144		1.0729	0.9605	1.0069
0.21	0.9426	1.0492	0.9247		1.0037	0.9149	0.9426		0.9792	1.1152	1.0924		0.21	1.0875	1.1339	1.1136		1.0501	1.0598	1.0313		1.0574	1.0851	1.1388		1.0883	0.9866	1.0208
0.22	0.9711	1.0704	0.9589		1.0118	0.9304	0.9752		0.9801	1.1372	1.1233		0.22	1.1054	1.142	1.1347		1.0761	1.0794	1.0444		1.0558	1.1079	1.1616		1.1201	0.9963	1.0427
0.23	0.9833	1.0834	0.9768		1.0281	0.9467	0.9972		0.9939	1.1534	1.151		0.23	1.1315	1.1583	1.1551		1.0753	1.1087	1.0517		1.0541	1.1355	1.173		1.1396	1.002	1.0582
0.24	1.0045	1.0842	0.9735		1.0419	0.9442	1.0053		1.0151	1.1648	1.1453		0.24	1.1543	1.1616	1.1632		1.0769	1.1323	1.0688		1.0704	1.151	1.1933		1.1616	1.011	1.0729
0.25	1.0134	1.0924	0.9638		1.0631	0.9475	0.9972		1.0411	1.1795	1.1388		0.25	1.1689	1.1697	1.1616		1.0753	1.1404	1.0908		1.0916	1.1567	1.2145		1.1559	1.0354	1.0737
0.26	1.0265	1.0965	0.967		1.0786	0.9475	1.0037		1.0549	1.1933	1.1347		0.26	1.1844	1.1746	1.1632		1.0948	1.1355	1.0989		1.107	1.1779	1.2332		1.1575	1.0533	1.0842
0.27	1.0379	1.1225	0.9776		1.0851	0.9508	1.0134		1.0753	1.1958	1.1608		0.27	1.2063	1.1966	1.1811		1.1176	1.1184	1.0932		1.1217	1.2015	1.2308		1.1526	1.0541	1.0908
0.28	1.0558	1.138	0.9963		1.0859	0.9573	1.0403		1.0769	1.186	1.1795		0.28	1.212	1.2023	1.2047		1.1363	1.1176	1.1176		1.1201	1.2308	1.2251		1.16	1.0615	1.0948
0.29	1.0574	1.151	1.0085		1.0891	0.963	1.0533		1.0834	1.1917	1.1982		0.29	1.2177	1.212	1.2226		1.151	1.1315	1.1388		1.1437	1.2454	1.2275		1.1624	1.068	1.1005
0.3	1.0615	1.1567	1.0289		1.0989	0.9711	1.0761		1.0899	1.2055	1.2047		0.3	1.221	1.2177	1.2283		1.1575	1.1616	1.1559		1.1429	1.2641	1.2397		1.1738	1.0842	1.1103
0.31	1.0598	1.1697	1.0387		1.107	0.9955	1.0712		1.1005	1.2365	1.2072		0.31	1.2389	1.2332	1.2186		1.1591	1.1958	1.1461		1.1608	1.2755	1.2584		1.1901	1.0916	1.1241
0.32	1.0729	1.1909	1.0517		1.116	0.9988	1.0875		1.0989	1.265	1.2072		0.32	1.2454	1.2381	1.2259		1.164	1.2112	1.1502		1.1713	1.2674	1.2764		1.2055	1.0834	1.1298
0.33	1.0883	1.2161	1.0517		1.1079	0.9972	1.0899		1.103	1.2764	1.212		0.33	1.2519	1.2357	1.2348		1.1665	1.2112	1.1543		1.1909	1.2552	1.2861		1.2291	1.0916	1.1363
0.34	1.1046	1.2316	1.0427		1.107	0.9825	1.1079		1.1176	1.2772	1.2381		0.34	1.2446	1.2308	1.2487		1.1795	1.2112	1.1787		1.1966	1.2536	1.2837		1.2267	1.1038	1.1396
0.35	1.1176	1.2365	1.046		1.1233	0.9931	1.103		1.1266	1.2617	1.2576		0.35	1.2397	1.2177	1.2536		1.195	1.2316	1.1827		1.1958	1.2658	1.2853		1.2283	1.1339	1.1412
0.36	1.1201	1.23	1.0492		1.1412	1.0167	1.107		1.1445	1.2723	1.2723		0.36	1.2487	1.2177	1.2617		1.212	1.2536	1.1982		1.199	1.2698	1.2829		1.2177	1.1461	1.1412
0.37	1.1201	1.2234	1.0737		1.1534	1.0305	1.1087		1.1534	1.3008	1.2796		0.37	1.2576	1.2291	1.2682		1.2161	1.2674	1.2031		1.2137	1.2739	1.2943		1.2104	1.1469	1.1673
0.38	1.1176	1.2365	1.0834		1.1543	1.0256	1.1136		1.1779	1.3252	1.2853		0.38	1.2633	1.2405	1.2641		1.2104	1.2617	1.2177		1.2308	1.2951	1.2894		1.2055	1.1412	1.186
0.39	1.1274	1.2511	1.0932		1.1697	1.0305	1.1201		1.1754	1.3309	1.291		0.39	1.256	1.2405	1.2511		1.1925	1.265	1.2112		1.2365	1.2991	1.2975		1.2055	1.1477	1.2112
0.4	1.1315	1.2739	1.1013		1.1738	1.0411	1.1144		1.1648	1.3276	1.2926		0.4	1.2715	1.2405	1.247		1.1836	1.2593	1.2104		1.2348	1.3	1.2918		1.2194	1.1705	1.2096
0.41	1.1494	1.2796	1.1119		1.1827	1.0606	1.1168		1.1632	1.3374	1.2983		0.41	1.2715	1.2479	1.2641		1.1966	1.2674	1.2161		1.234	1.3024	1.3073		1.2405	1.1795	1.2186
0.42	1.1648	1.291	1.1201		1.186	1.0606	1.1209		1.1665	1.3561	1.3114		0.42	1.2788	1.2584	1.2877		1.2153	1.2731	1.2267		1.2405	1.3252	1.3008		1.2544	1.1836	1.2137
0.43	1.1738	1.2967	1.1249		1.1901	1.068	1.1372		1.1722	1.3561	1.3203		0.43	1.2755	1.2609	1.3		1.2308	1.2918	1.2243		1.2454	1.3504	1.3073		1.2658	1.1722	1.2129
0.44	1.16	1.291	1.1241		1.1746	1.0582	1.151		1.1819	1.3521	1.3252		0.44	1.2845	1.2414	1.2861		1.2316	1.2845	1.2234		1.2487	1.3431	1.3032		1.2707	1.1827	1.2047
0.45	1.1347	1.2967	1.1445		1.1713	1.072	1.1616		1.2007	1.3561	1.3293		0.45	1.2869	1.2267	1.2796		1.2308	1.2886	1.2397		1.2405	1.3398	1.3211		1.2764	1.1868	1.2023
0.46	1.1429	1.2991	1.151		1.1754	1.0631	1.1583		1.2104	1.3691	1.3341		0.46	1.2788	1.2202	1.2869		1.2422	1.2894	1.2609		1.2438	1.3358	1.3154		1.2715	1.1925	1.208
0.47	1.1632	1.313	1.1477		1.1982	1.072	1.1543		1.2161	1.3879	1.3439		0.47	1.2804	1.2446	1.2951		1.2405	1.3105	1.2755		1.2405	1.3488	1.3244		1.2601	1.186	1.2234
0.48	1.1982	1.3024	1.1282		1.2137	1.072	1.1461		1.2112	1.3846	1.3472		0.48	1.291	1.2609	1.2967		1.2536	1.3154	1.2707		1.247	1.3586	1.3284		1.2617	1.1844	1.2283
0.49	1.2031	1.3114	1.1225		1.2243	1.081	1.1591		1.23	1.37	1.339		0.49	1.3024	1.256	1.3008		1.2454	1.3219	1.2576		1.2519	1.3635	1.3496		1.2869	1.1925	1.23
0.5	1.2161	1.3048	1.1339		1.2137	1.0851	1.1575		1.2405	1.3626	1.3333		0.5	1.3089	1.2511	1.3048		1.2479	1.3154	1.2576		1.2641	1.3675	1.3504		1.2869	1.2063	1.2267
0.51	1.2104	1.3122	1.1445		1.2104	1.081	1.1689		1.2527	1.3594	1.3236		0.51	1.2983	1.2479	1.3048		1.2422	1.3138	1.2682		1.2755	1.361	1.3561		1.291	1.2063	1.2316
0.52	1.1974	1.3032	1.1396		1.2145	1.0794	1.1665		1.243	1.3651	1.3276		0.52	1.2877	1.2641	1.3048		1.247	1.3016	1.2747		1.2804	1.3626	1.3472		1.2739	1.2202	1.2324
0.53	1.1868	1.3179	1.1445		1.2348	1.0786	1.1827		1.2275	1.3691	1.3301		0.53	1.2772	1.2641	1.3122		1.2422	1.3138	1.269		1.2715	1.3651	1.3447		1.2894	1.2251	1.2503
0.54	1.1941	1.3268	1.1502		1.2275	1.0818	1.1876		1.2275	1.374	1.3431		0.54	1.2812	1.2788	1.3122		1.2454	1.3203	1.2707		1.269	1.3773	1.3439		1.2934	1.2365	1.2584
0.55	1.2186	1.3366	1.1689		1.2145	1.0989	1.1925		1.2316	1.3952	1.3594		0.55	1.2951	1.2812	1.3073		1.247	1.3309	1.2869		1.2617	1.3838	1.3537		1.3	1.2316	1.2658
0.56	1.2389	1.3464	1.1665		1.2112	1.1095	1.1852		1.2527	1.4017	1.3765		0.56	1.3138	1.2845	1.3171		1.2625	1.3431	1.2877		1.265	1.3911	1.3635		1.304	1.2487	1.265
0.57	1.2438	1.3504	1.1705		1.2234	1.1193	1.177		1.2536	1.4172	1.3708		0.57	1.3195	1.2747	1.3228		1.265	1.3537	1.2902		1.2698	1.4001	1.3659		1.3105	1.2666	1.2739
0.58	1.2454	1.3602	1.1673		1.2324	1.116	1.1722		1.2666	1.4245	1.3667		0.58	1.3211	1.2674	1.3154		1.2731	1.3545	1.2943		1.2731	1.405	1.3635		1.3162	1.2658	1.2707
0.59	1.2291	1.3691	1.1689		1.2405	1.1193	1.1787		1.2527	1.4245	1.3586		0.59	1.3187	1.2617	1.2975		1.2755	1.3317	1.3171		1.2796	1.4123	1.3626		1.313	1.2584	1.2601
0.6	1.221	1.374	1.1681		1.2503	1.1152	1.1901		1.2332	1.4188	1.374		0.6	1.313	1.2658	1.2926		1.2821	1.3219	1.3244		1.2764	1.4107	1.3561		1.3073	1.247	1.2438
0.61	1.2137	1.3659	1.1673		1.2633	1.1119	1.1901		1.221	1.4033	1.3814		0.61	1.2983	1.2674	1.3073		1.2804	1.3293	1.3162		1.2869	1.4147	1.3594		1.3114	1.2519	1.2495
0.62	1.2234	1.361	1.1754		1.2609	1.1111	1.1925		1.2405	1.4172	1.3871		0.62	1.2894	1.2812	1.3114		1.2812	1.3398	1.2967		1.2918	1.4074	1.3691		1.3236	1.2503	1.2609
0.63	1.2275	1.3724	1.1689		1.2503	1.116	1.2015		1.2739	1.4188	1.3903		0.63	1.2796	1.2796	1.3228		1.2853	1.3561	1.2894		1.2991	1.3993	1.3757		1.339	1.256	1.2804
0.64	1.2348	1.3903	1.1779		1.247	1.1209	1.2218		1.2796	1.4196	1.3879		0.64	1.2829	1.2837	1.3179		1.2918	1.3602	1.2918		1.3073	1.3887	1.3708		1.348	1.2568	1.291
0.65	1.2316	1.4017	1.1803		1.234	1.1323	1.23		1.2788	1.409	1.3871		0.65	1.2918	1.2812	1.3236		1.2967	1.3805	1.3		1.3024	1.3805	1.3561		1.3398	1.2601	1.2934
0.66	1.2373	1.3838	1.1998		1.2487	1.1331	1.2357		1.2666	1.409	1.3854		0.66	1.304	1.2821	1.3244		1.2926	1.3838	1.3122		1.3065	1.3846	1.3635		1.3236	1.2552	1.2845
0.67	1.2462	1.3854	1.1917		1.2487	1.1404	1.2357		1.2837	1.4196	1.4172		0.67	1.313	1.2918	1.3358		1.2812	1.3952	1.3154		1.3057	1.396	1.3635		1.3195	1.2552	1.2943
0.68	1.256	1.3773	1.1893		1.2609	1.1298	1.23		1.2975	1.4343	1.4424		0.68	1.3089	1.2853	1.3464		1.2796	1.3789	1.3114		1.3268	1.4058	1.3643		1.3236	1.256	1.2902
0.69	1.2511	1.3895	1.1656		1.2576	1.1249	1.2202		1.3032	1.4367	1.4432		0.69	1.304	1.2902	1.3439		1.2731	1.3643	1.3		1.3293	1.4025	1.3529		1.3154	1.2674	1.2894
0.7	1.2462	1.3911	1.1746		1.2641	1.1266	1.212		1.3	1.4449	1.4221		0.7	1.2902	1.2853	1.3398		1.2707	1.3553	1.2902		1.3293	1.3968	1.3472		1.3065	1.278	1.2739
0.71	1.2438	1.3887	1.1713		1.2764	1.1331	1.2177		1.2934	1.4343	1.4074		0.71	1.291	1.2902	1.3293		1.2674	1.3643	1.3032		1.3244	1.3968	1.3504		1.3057	1.2788	1.278
0.72	1.2601	1.383	1.1787		1.2894	1.1437	1.212		1.3179	1.4473	1.4066		0.72	1.2975	1.2951	1.3252		1.2869	1.3748	1.304		1.326	1.4147	1.3569		1.3195	1.2764	1.2967
0.73	1.2723	1.3789	1.1779		1.2926	1.1347	1.2063		1.3138	1.4465	1.3895		0.73	1.3187	1.3032	1.3301		1.3032	1.3773	1.3146		1.3122	1.418	1.3789		1.3317	1.2674	1.3073
0.74	1.2886	1.3708	1.1844		1.2902	1.1372	1.2129		1.3114	1.4481	1.3805		0.74	1.3211	1.3097	1.348		1.3105	1.3838	1.2943		1.3097	1.4204	1.3919		1.339	1.2682	1.3154
0.75	1.2886	1.3708	1.2039		1.2845	1.1266	1.199		1.2959	1.4489	1.3895		0.75	1.3211	1.3008	1.3553		1.3016	1.3911	1.2829		1.3048	1.4098	1.3968		1.3407	1.278	1.3016
0.76	1.2894	1.3618	1.2039		1.2747	1.1323	1.212		1.3	1.444	1.3976		0.76	1.3146	1.2926	1.3561		1.304	1.3968	1.2723		1.3138	1.4042	1.396		1.3545	1.2829	1.3
0.77	1.265	1.3716	1.1998		1.2731	1.138	1.2145		1.3122	1.4571	1.4042		0.77	1.326	1.2959	1.3488		1.3016	1.3895	1.2959		1.3089	1.4098	1.3814		1.3488	1.2772	1.3016
0.78	1.243	1.3822	1.1982		1.2723	1.1518	1.2348		1.3122	1.4554	1.383		0.78	1.3252	1.3	1.3578		1.3138	1.3805	1.3162		1.3146	1.4229	1.3805		1.3472	1.2723	1.3073
0.79	1.2316	1.3985	1.208		1.2853	1.1534	1.2332		1.3122	1.4538	1.3805		0.79	1.339	1.2886	1.3708		1.3146	1.3765	1.3268		1.3211	1.4449	1.3781		1.3455	1.2796	1.3024
0.8	1.2397	1.4066	1.2129		1.2934	1.142	1.2226		1.2967	1.4505	1.3895		0.8	1.3228	1.2755	1.3683		1.3122	1.3675	1.3187		1.326	1.4424	1.4082		1.3586	1.2821	1.2934
0.81	1.2552	1.3944	1.2161		1.2951	1.1404	1.2218		1.3089	1.4408	1.4025		0.81	1.3252	1.2755	1.3586		1.3016	1.3797	1.3195		1.3236	1.4351	1.4082		1.3643	1.2861	1.2991
0.82	1.2641	1.3911	1.2072		1.3081	1.1298	1.2194		1.304	1.4416	1.4147		0.82	1.3293	1.3032	1.3439		1.3024	1.3879	1.3228		1.326	1.4326	1.4082		1.361	1.3008	1.3089
0.83	1.2584	1.396	1.1998		1.313	1.1306	1.2291		1.313	1.4424	1.4131		0.83	1.339	1.3252	1.3578		1.3073	1.4025	1.3146		1.3268	1.4343	1.3911		1.3545	1.3333	1.2959
0.84	1.2625	1.4098	1.1941		1.3179	1.1241	1.2291		1.3114	1.4546	1.431		0.84	1.3455	1.3293	1.3626		1.3089	1.3952	1.3		1.3317	1.4278	1.3862		1.3431	1.335	1.2959
0.85	1.2633	1.4082	1.195		1.3048	1.1249	1.2495		1.3382	1.4717	1.4481		0.85	1.3317	1.3171	1.3691		1.3097	1.3887	1.2918		1.3382	1.4107	1.3862		1.3211	1.3293	1.2812
0.86	1.2707	1.4066	1.2031		1.2934	1.129	1.2397		1.3423	1.4652	1.4554		0.86	1.3179	1.2983	1.3569		1.304	1.3814	1.3073		1.3407	1.4033	1.383		1.3146	1.3089	1.3
0.87	1.2755	1.4147	1.2072		1.2812	1.1347	1.247		1.3472	1.4709	1.4522		0.87	1.3187	1.2926	1.3594		1.3065	1.3862	1.3154		1.3407	1.405	1.3903		1.3244	1.3065	1.3057
0.88	1.2641	1.4017	1.2177		1.2804	1.1437	1.2332		1.3415	1.4628	1.4424		0.88	1.3211	1.2967	1.3472		1.2991	1.3879	1.3187		1.3252	1.4098	1.3862		1.348	1.3016	1.3203
0.89	1.269	1.3805	1.2243		1.2821	1.1477	1.2446		1.339	1.4628	1.4424		0.89	1.339	1.2967	1.3358		1.3032	1.3854	1.3162		1.313	1.4066	1.3887		1.3504	1.2983	1.3293
0.9	1.2593	1.361	1.2202		1.2869	1.1502	1.2324		1.3358	1.4505	1.4367		0.9	1.3407	1.2991	1.3439		1.2967	1.3936	1.3179		1.3162	1.4123	1.3879		1.3537	1.3105	1.326
0.91	1.2625	1.3773	1.2177		1.2943	1.1469	1.2365		1.3284	1.4481	1.4416		0.91	1.3447	1.3081	1.3578		1.3073	1.4009	1.3138		1.3276	1.4261	1.3862		1.3545	1.3138	1.3228
0.92	1.2601	1.4017	1.2072		1.3032	1.1559	1.2308		1.3252	1.4579	1.4302		0.92	1.3439	1.3114	1.3602		1.3154	1.4131	1.3081		1.339	1.4522	1.3781		1.3512	1.326	1.3162
0.93	1.2666	1.4188	1.195		1.3089	1.1616	1.2397		1.3154	1.4571	1.4172		0.93	1.3407	1.3065	1.3521		1.3268	1.3993	1.3097		1.3431	1.4644	1.361		1.3496	1.313	1.3162
0.94	1.2877	1.4107	1.1795		1.3	1.1705	1.2389		1.3105	1.4538	1.4115		0.94	1.3594	1.2983	1.3439		1.3228	1.3968	1.3211		1.3382	1.4481	1.3626		1.3407	1.313	1.3309
0.95	1.2983	1.4001	1.1803		1.291	1.1567	1.2373		1.313	1.4375	1.4115		0.95	1.3691	1.2951	1.3537		1.3211	1.396	1.3439		1.3374	1.4131	1.3643		1.3374	1.3105	1.3398
0.96	1.3057	1.4001	1.1917		1.2821	1.1534	1.2186		1.3211	1.4481	1.4196		0.96	1.3635	1.3097	1.3464		1.3187	1.4001	1.3464		1.3366	1.3944	1.3887		1.3301	1.3171	1.3521
0.97	1.2943	1.3985	1.2055		1.2861	1.1608	1.2039		1.3317	1.4619	1.418		0.97	1.3366	1.3179	1.3439		1.326	1.405	1.3455		1.3439	1.4139	1.3968		1.3252	1.326	1.3431
0.98	1.2934	1.3871	1.2031		1.2943	1.1713	1.2145		1.3464	1.4758	1.4261		0.98	1.3138	1.3195	1.3455		1.326	1.4009	1.3382		1.3398	1.4408	1.4107		1.3415	1.3293	1.3496
0.99	1.2886	1.3887	1.2039		1.2975	1.1632	1.2373		1.3455	1.4823	1.4383		0.99	1.3228	1.3195	1.3455		1.3309	1.4107	1.3407		1.3488	1.4449	1.4066		1.3488	1.3407	1.3496
1	1.2877	1.3952	1.2186		1.2918	1.1526	1.2454		1.3439	1.475	1.431		1	1.326	1.3073	1.3464		1.3325	1.4009	1.339		1.3423	1.4326	1.4001		1.3537	1.3472	1.3512
1.01	1.2902	1.4066	1.23		1.2682	1.1477	1.2446		1.3358	1.4912	1.4318		1.01	1.339	1.3114	1.3415		1.3301	1.3985	1.3252		1.3529	1.4204	1.4025		1.3545	1.3415	1.3472
1.02	1.3057	1.4123	1.2291		1.2804	1.1624	1.2495		1.3431	1.4921	1.4147		1.02	1.326	1.3105	1.3553		1.3171	1.3871	1.3187		1.3447	1.4147	1.3952		1.3724	1.3341	1.3415
1.03	1.304	1.4147	1.2129		1.2894	1.1746	1.2715		1.3455	1.488	1.418		1.03	1.3171	1.3122	1.3773		1.3089	1.3919	1.3154		1.3512	1.4164	1.3936		1.3781	1.3284	1.3407
1.04	1.3048	1.4147	1.2047		1.3114	1.1795	1.2772		1.3431	1.4774	1.4107		1.04	1.3219	1.3162	1.3903		1.3146	1.4042	1.3317		1.3594	1.4326	1.3757		1.3805	1.3407	1.3358
1.05	1.2845	1.4066	1.2063		1.313	1.1795	1.2739		1.3374	1.4709	1.4082		1.05	1.3333	1.3073	1.3911		1.3301	1.4147	1.3586		1.37	1.4432	1.3789		1.374	1.3455	1.3333
1.06	1.2796	1.4107	1.2194		1.3089	1.1722	1.265		1.3341	1.4725	1.4204		1.06	1.3472	1.304	1.3708		1.3341	1.4204	1.3724		1.3683	1.4253	1.3952		1.3675	1.3423	1.3398
1.07	1.2764	1.4172	1.2234		1.3105	1.1779	1.2527		1.3317	1.4856	1.4164		1.07	1.3382	1.291	1.3569		1.3341	1.4229	1.3651		1.3651	1.4172	1.409		1.3675	1.339	1.3398
1.08	1.2902	1.4164	1.2332		1.3146	1.1803	1.2544		1.3228	1.4929	1.4269		1.08	1.3333	1.2902	1.3464		1.3268	1.4245	1.3301		1.3423	1.418	1.4098		1.3561	1.3252	1.3366
1.09	1.3008	1.4204	1.2324		1.3219	1.1884	1.2544		1.3244	1.4953	1.4115		1.09	1.3211	1.2877	1.3472		1.3333	1.4212	1.3154		1.3488	1.4245	1.4155		1.3765	1.3228	1.3398
1.1	1.3016	1.4155	1.2414		1.3211	1.1868	1.2609		1.3317	1.4904	1.4196		1.1	1.3195	1.2902	1.3472		1.3317	1.396	1.3187		1.3374	1.4212	1.4155		1.3805	1.3171	1.348
1.11	1.2894	1.4164	1.2373		1.3162	1.1811	1.2454		1.3504	1.4888	1.4245		1.11	1.3211	1.2829	1.3602		1.3301	1.374	1.3244		1.3415	1.4221	1.4269		1.3887	1.3268	1.3578
1.12	1.2951	1.4098	1.2316		1.3162	1.1827	1.243		1.3578	1.4888	1.4326		1.12	1.3309	1.2869	1.3691		1.3293	1.3618	1.3154		1.3333	1.4278	1.4131		1.37	1.3268	1.3521
1.13	1.3048	1.4278	1.2275		1.3187	1.1779	1.256		1.3512	1.4807	1.4497		1.13	1.3301	1.2951	1.3724		1.3317	1.3814	1.3089		1.3236	1.4326	1.405		1.3659	1.3431	1.3472
1.14	1.3236	1.4351	1.2259		1.313	1.1852	1.2764		1.3504	1.4676	1.4514		1.14	1.326	1.3032	1.3545		1.3407	1.4033	1.3244		1.3358	1.4343	1.3936		1.3748	1.3398	1.3431
1.15	1.3244	1.4302	1.2194		1.3097	1.1754	1.2731		1.3398	1.466	1.4522		1.15	1.326	1.3	1.3423		1.3439	1.4074	1.3423		1.3407	1.4416	1.396		1.3871	1.3398	1.3431
1.16	1.3122	1.4212	1.2218		1.3057	1.1754	1.2568		1.3455	1.4644	1.4375		1.16	1.3382	1.3008	1.339		1.3293	1.4066	1.3578		1.3651	1.4343	1.4082		1.3822	1.3268	1.3415
1.17	1.2926	1.4229	1.212		1.3138	1.1852	1.2601		1.3439	1.4807	1.4229		1.17	1.3488	1.3154	1.3455		1.3244	1.4001	1.3635		1.374	1.4375	1.4001		1.3643	1.3423	1.3464
1.18	1.2845	1.4416	1.2283		1.3179	1.1966	1.269		1.3618	1.4921	1.4147		1.18	1.3512	1.3358	1.3529		1.3146	1.4115	1.3488		1.383	1.4359	1.3854		1.3651	1.3472	1.3472
1.19	1.2934	1.4449	1.2316		1.335	1.1982	1.2625		1.37	1.5051	1.4033		1.19	1.3423	1.335	1.3602		1.3341	1.4139	1.3374		1.3838	1.4497	1.3569		1.3748	1.3561	1.3407
1.2	1.3024	1.44	1.247		1.3341	1.1876	1.2495		1.3838	1.4945	1.4147		1.2	1.3382	1.3211	1.37		1.339	1.4245	1.3195		1.3773	1.4416	1.3602		1.3879	1.3521	1.3293
1.21	1.3016	1.4343	1.234		1.335	1.1852	1.243		1.3667	1.4839	1.4261		1.21	1.3382	1.3016	1.3594		1.348	1.4237	1.3431		1.3846	1.4326	1.3675		1.3781	1.3521	1.3301
1.22	1.2926	1.431	1.2397		1.3236	1.1836	1.2462		1.3618	1.4733	1.4261		1.22	1.3447	1.3114	1.3529		1.3219	1.4286	1.3447		1.3797	1.4237	1.3952		1.37	1.3447	1.3358
1.23	1.2894	1.4375	1.2357		1.313	1.1811	1.256		1.3472	1.4815	1.4253		1.23	1.3626	1.3195	1.3586		1.3219	1.4221	1.3447		1.3691	1.44	1.4082		1.3667	1.3358	1.3366
1.24	1.2951	1.4343	1.2316		1.3122	1.1811	1.265		1.3521	1.4872	1.4253		1.24	1.3635	1.3187	1.3797		1.304	1.4196	1.3293		1.3569	1.4497	1.4082		1.3773	1.335	1.3211
1.25	1.2845	1.4375	1.221		1.3122	1.1933	1.2821		1.3472	1.4896	1.4392		1.25	1.3496	1.3024	1.3846		1.3179	1.4164	1.3374		1.3561	1.4522	1.3911		1.3805	1.3439	1.3228
1.26	1.2837	1.4261	1.2251		1.3236	1.1933	1.291		1.3521	1.4782	1.4497		1.26	1.3171	1.2796	1.3732		1.3114	1.4212	1.3455		1.3586	1.4481	1.3586		1.37	1.339	1.3228
1.27	1.2764	1.4188	1.2373		1.3244	1.195	1.2829		1.3602	1.4742	1.4562		1.27	1.2975	1.2723	1.3569		1.3187	1.4278	1.3594		1.3578	1.4538	1.3651		1.3537	1.335	1.3325
1.28	1.2934	1.4139	1.2348		1.3317	1.1844	1.2804		1.3708	1.4685	1.4489		1.28	1.2975	1.2877	1.3569		1.3333	1.4204	1.3545		1.3496	1.4497	1.3822		1.3529	1.3293	1.3219
1.29	1.3024	1.4229	1.2202		1.3341	1.1844	1.2666		1.3716	1.4782	1.4351		1.29	1.3065	1.3073	1.3504		1.3309	1.4196	1.348		1.3561	1.4505	1.4074		1.3675	1.335	1.3244
1.3	1.3081	1.4375	1.2145		1.3301	1.1893	1.2658		1.3651	1.4823	1.4237		1.3	1.3301	1.3105	1.3586		1.3276	1.4204	1.3341		1.3578	1.4375	1.4066		1.3732	1.3317	1.3268
1.31	1.3089	1.4505	1.2161		1.3203	1.1901	1.2601		1.3569	1.4815	1.4172		1.31	1.3553	1.2983	1.3651		1.3309	1.4302	1.3301		1.3659	1.4449	1.409		1.3822	1.3284	1.3358
1.32	1.3024	1.4546	1.2153		1.3146	1.1884	1.2479		1.3529	1.4799	1.4164		1.32	1.3586	1.3089	1.37		1.3423	1.4229	1.3317		1.3667	1.4351	1.4196		1.3748	1.326	1.3341
1.33	1.304	1.4449	1.2137		1.326	1.1746	1.2397		1.3504	1.488	1.4098		1.33	1.3537	1.3138	1.3691		1.3309	1.4269	1.3333		1.3643	1.4351	1.4123		1.3805	1.326	1.3407
1.34	1.3048	1.4457	1.2104		1.3301	1.1754	1.2357		1.3504	1.4904	1.4115		1.34	1.3545	1.3122	1.3602		1.3211	1.4237	1.3317		1.3545	1.4326	1.3903		1.3651	1.3252	1.3439
1.35	1.2967	1.4302	1.2316		1.3179	1.173	1.2479		1.3504	1.4872	1.4058		1.35	1.3643	1.2967	1.3578		1.3048	1.4164	1.339		1.3447	1.4481	1.3716		1.3594	1.3301	1.3529
1.36	1.2918	1.4278	1.2389		1.2975	1.1795	1.2617		1.3512	1.4864	1.4123		1.36	1.3504	1.2967	1.3578		1.3219	1.4001	1.3423		1.3447	1.4554	1.3651		1.3529	1.3309	1.3382
1.37	1.2926	1.4131	1.256		1.2967	1.1811	1.2747		1.3545	1.4921	1.4269		1.37	1.3358	1.3065	1.3594		1.3301	1.4115	1.3472		1.3488	1.453	1.3805		1.3512	1.3244	1.3382
1.38	1.3081	1.4082	1.2446		1.3138	1.1852	1.2837		1.3643	1.4953	1.4335		1.38	1.3317	1.3171	1.361		1.3366	1.4229	1.339		1.3578	1.4343	1.3936		1.3586	1.3154	1.3374
1.39	1.3195	1.4042	1.2389		1.3276	1.186	1.278		1.3659	1.4945	1.4457		1.39	1.3423	1.3105	1.3553		1.3252	1.4318	1.326		1.3488	1.4335	1.4082		1.3635	1.3236	1.3464
1.4	1.3073	1.4107	1.2316		1.3431	1.1893	1.2666		1.3651	1.4945	1.4383		1.4	1.3333	1.3	1.3472		1.313	1.4269	1.3276		1.3553	1.4302	1.3985		1.3781	1.3341	1.3407
1.41	1.3032	1.4212	1.2251		1.3423	1.1827	1.2568		1.3675	1.4864	1.4383		1.41	1.3244	1.2877	1.3464		1.3146	1.4196	1.3309		1.3537	1.4286	1.3919		1.3903	1.3415	1.3382
1.42	1.2934	1.4343	1.2251		1.3398	1.1738	1.265		1.3757	1.4742	1.4449		1.42	1.3219	1.2934	1.348		1.3187	1.4131	1.3366		1.3626	1.4326	1.3757		1.3936	1.3488	1.3488
1.43	1.3008	1.4497	1.2186		1.3187	1.1811	1.2576		1.3814	1.4725	1.4424		1.43	1.3366	1.2959	1.3472		1.3171	1.4107	1.3317		1.3561	1.4335	1.37		1.3838	1.3496	1.3675
1.44	1.2975	1.4514	1.2177		1.3089	1.1836	1.2544		1.3675	1.4921	1.4546		1.44	1.339	1.3008	1.3529		1.3228	1.4139	1.3366		1.3569	1.4449	1.3643		1.3773	1.3529	1.3732
1.45	1.2943	1.4367	1.2072		1.3016	1.1909	1.256		1.3537	1.5124	1.4351		1.45	1.3431	1.3065	1.3504		1.3333	1.4229	1.3496		1.361	1.4343	1.3789		1.374	1.3398	1.3578
1.46	1.2975	1.4058	1.2007		1.2967	1.1787	1.2698		1.3521	1.5222	1.4424		1.46	1.3366	1.3171	1.3561		1.3398	1.4302	1.3512		1.361	1.4375	1.3968		1.3667	1.3431	1.3464
1.47	1.2975	1.4155	1.2153		1.3032	1.1803	1.2731		1.3569	1.5181	1.4318		1.47	1.3293	1.3187	1.3496		1.3358	1.4302	1.348		1.3586	1.4326	1.4058		1.361	1.3496	1.3464
1.48	1.3016	1.4204	1.2275		1.3252	1.186	1.2658		1.3537	1.501	1.4359		1.48	1.3219	1.326	1.3521		1.3293	1.4212	1.348		1.3618	1.4343	1.4066		1.3626	1.3529	1.3415
1.49	1.3024	1.4375	1.2291		1.3366	1.186	1.2544		1.3358	1.475	1.4188		1.49	1.3179	1.3236	1.3504		1.3325	1.4155	1.348		1.3724	1.431	1.4033		1.3626	1.3529	1.3301
1.5	1.3073	1.44	1.2096		1.3423	1.1958	1.2462		1.3301	1.475	1.4074		1.5	1.3252	1.3244	1.3537		1.3374	1.4269	1.3504		1.3797	1.4359	1.4098		1.3626	1.3341	1.3309
1.51	1.3089	1.4432	1.2039		1.3179	1.1844	1.234		1.3431	1.4709	1.4058		1.51	1.3244	1.3081	1.3407		1.3464	1.4188	1.3431		1.3651	1.4489	1.4172		1.3626	1.3252	1.3415
1.52	1.3236	1.4326	1.199		1.3179	1.1811	1.2438		1.3618	1.4856	1.4212		1.52	1.3268	1.304	1.3382		1.3236	1.4164	1.3455		1.3545	1.4497	1.4164		1.3708	1.3211	1.3488
1.53	1.3268	1.4164	1.2129		1.304	1.1868	1.2503		1.3537	1.4733	1.4326		1.53	1.3325	1.3057	1.3366		1.335	1.405	1.3407		1.3447	1.4375	1.4098		1.3651	1.3423	1.3439
1.54	1.3211	1.4221	1.2177		1.3203	1.2031	1.2698		1.3423	1.4839	1.4302		1.54	1.3423	1.3065	1.3464		1.335	1.4017	1.3415		1.3464	1.4343	1.4042		1.3659	1.3561	1.3496
1.55	1.3114	1.418	1.212		1.3162	1.2137	1.2625		1.3366	1.488	1.4261		1.55	1.3496	1.3016	1.3472		1.3602	1.4025	1.3374		1.3553	1.4335	1.4074		1.3765	1.3504	1.3415
1.56	1.3073	1.4229	1.2153		1.3228	1.2161	1.2698		1.3504	1.4986	1.4253		1.56	1.361	1.3024	1.3439		1.3431	1.4017	1.3423		1.3545	1.4424	1.4017		1.396	1.3219	1.3447
1.57	1.3065	1.4107	1.2202		1.3268	1.2088	1.2731		1.3545	1.4978	1.4269		1.57	1.3724	1.3048	1.339		1.335	1.4204	1.3325		1.3496	1.4408	1.4017		1.3968	1.3057	1.3455
1.58	1.2951	1.4229	1.2446		1.326	1.2104	1.2853		1.3537	1.4904	1.4245		1.58	1.3659	1.3114	1.3317		1.3171	1.4098	1.3333		1.3333	1.4269	1.3895		1.3968	1.3179	1.3496
1.59	1.2943	1.4343	1.2414		1.3195	1.1876	1.2845		1.3529	1.4961	1.4164		1.59	1.3407	1.3	1.3333		1.3203	1.4147	1.3366		1.3293	1.4131	1.3976		1.3952	1.3472	1.348
1.6	1.3016	1.4343	1.2259		1.3097	1.1868	1.2764		1.3675	1.4912	1.4196		1.6	1.3171	1.304	1.3301		1.3171	1.4082	1.3472		1.326	1.4098	1.3928		1.4082	1.3537	1.3333
1.61	1.304	1.4286	1.2112		1.3105	1.1762	1.2772		1.3871	1.4904	1.4294		1.61	1.3122	1.3008	1.3464		1.3276	1.409	1.3447		1.3366	1.4351	1.3968		1.4098	1.3447	1.3407
1.62	1.2959	1.4082	1.2088		1.3195	1.1819	1.278		1.3936	1.4864	1.4286		1.62	1.3244	1.3	1.3569		1.3211	1.4066	1.3382		1.3431	1.4522	1.3846		1.4139	1.3333	1.3439
1.63	1.2943	1.4115	1.2218		1.3187	1.1746	1.2861		1.3797	1.5018	1.4123		1.63	1.3252	1.2975	1.3651		1.3203	1.4082	1.3228		1.3464	1.4522	1.3928		1.3993	1.3382	1.3447
1.64	1.2902	1.4196	1.2389		1.3187	1.173	1.2812		1.3773	1.5108	1.396		1.64	1.3317	1.2918	1.361		1.3219	1.4196	1.326		1.335	1.4522	1.3928		1.3936	1.3415	1.339
1.65	1.2959	1.4318	1.2462		1.3138	1.1738	1.2723		1.3797	1.5124	1.4025		1.65	1.339	1.2967	1.3561		1.3325	1.4139	1.3284		1.3317	1.4449	1.4033		1.3748	1.3415	1.3472
1.66	1.2902	1.4229	1.2454		1.3171	1.1762	1.2584		1.383	1.4937	1.418		1.66	1.3472	1.3024	1.3578		1.3415	1.4253	1.3504		1.3447	1.4481	1.396		1.3797	1.3398	1.3602
1.67	1.2902	1.4147	1.2267		1.3162	1.1673	1.2544		1.3691	1.4847	1.4204		1.67	1.3431	1.3138	1.3626		1.3415	1.4253	1.3382		1.361	1.4326	1.3993		1.3708	1.3398	1.3724
1.68	1.2967	1.4098	1.2186		1.3236	1.1705	1.2633		1.3561	1.4782	1.4326		1.68	1.3333	1.3179	1.3578		1.3382	1.4424	1.3341		1.361	1.4196	1.3968		1.3773	1.3415	1.361
1.69	1.2943	1.409	1.2063		1.3284	1.1779	1.2788		1.3545	1.4969	1.44		1.69	1.3358	1.3187	1.3724		1.335	1.4326	1.3162		1.3586	1.4139	1.3985		1.3659	1.3398	1.3594
1.7	1.2918	1.4033	1.212		1.326	1.2063	1.2983		1.3561	1.5075	1.4489		1.7	1.339	1.3032	1.3716		1.3203	1.4253	1.3276		1.3447	1.4172	1.3903		1.3789	1.3341	1.3594
1.71	1.2869	1.3976	1.212		1.3081	1.2104	1.3		1.3626	1.5026	1.4432		1.71	1.3341	1.304	1.3765		1.3154	1.409	1.3284		1.348	1.4269	1.3919		1.3903	1.3317	1.361
1.72	1.2894	1.3968	1.2161		1.3073	1.2063	1.2975		1.3683	1.4978	1.4375		1.72	1.3382	1.313	1.3757		1.3105	1.4082	1.3358		1.3488	1.4335	1.3976		1.4009	1.3447	1.3415
1.73	1.3008	1.4025	1.2145		1.3219	1.1844	1.2894		1.3626	1.4847	1.4269		1.73	1.3374	1.3228	1.3732		1.335	1.4033	1.3358		1.3691	1.4408	1.431		1.3854	1.3521	1.3187
1.74	1.3073	1.4017	1.2055		1.3276	1.1941	1.2861		1.3553	1.4929	1.4245		1.74	1.3496	1.3179	1.3635		1.3423	1.4074	1.339		1.361	1.444	1.4318		1.3651	1.348	1.3203
1.75	1.3228	1.4147	1.1982		1.3317	1.199	1.2861		1.3545	1.4856	1.4229		1.75	1.3447	1.2951	1.3415		1.3521	1.4066	1.348		1.3521	1.4318	1.409		1.3594	1.3431	1.3325
1.76	1.326	1.4164	1.2039		1.3374	1.2218	1.278		1.37	1.4856	1.4343		1.76	1.3431	1.2951	1.348		1.3447	1.4082	1.348		1.3276	1.4082	1.3797		1.3757	1.3504	1.3431
1.77	1.3236	1.4375	1.2129		1.3504	1.2096	1.2796		1.3789	1.475	1.44		1.77	1.3398	1.3057	1.3504		1.3358	1.4098	1.3407		1.3219	1.4001	1.3708		1.3928	1.3651	1.3472
1.78	1.3203	1.453	1.2226		1.3431	1.2063	1.2845		1.3797	1.4896	1.4392		1.78	1.3464	1.3187	1.3667		1.326	1.4147	1.3496		1.3244	1.4115	1.3871		1.4033	1.3691	1.348
1.79	1.3081	1.4709	1.2153		1.3358	1.1893	1.2837		1.37	1.5051	1.4489		1.79	1.3512	1.3211	1.3545		1.3114	1.4237	1.3521		1.3366	1.44	1.3976		1.3968	1.3626	1.3415
1.8	1.3073	1.4676	1.2112		1.3284	1.1868	1.2812		1.3643	1.5206	1.4489		1.8	1.3537	1.3138	1.3529		1.3073	1.4237	1.3651		1.361	1.4481	1.3944		1.3911	1.361	1.339
1.81	1.2926	1.4481	1.2104		1.3195	1.1893	1.2764		1.3586	1.5067	1.4457		1.81	1.3488	1.3097	1.3464		1.3162	1.4253	1.3529		1.3773	1.4367	1.3911		1.3805	1.3618	1.3455
1.82	1.304	1.418	1.2007		1.3089	1.1941	1.2731		1.3586	1.4978	1.4343		1.82	1.3447	1.3187	1.3374		1.3268	1.4253	1.3521		1.3944	1.4212	1.3838		1.3822	1.3537	1.3643
1.83	1.2975	1.4001	1.2023		1.3065	1.1974	1.278		1.3594	1.501	1.4286		1.83	1.3423	1.3203	1.3496		1.3366	1.4269	1.3602		1.3879	1.4082	1.3944		1.3846	1.3472	1.3626
1.84	1.3228	1.4017	1.2072		1.3154	1.1893	1.2772		1.3586	1.5043	1.4359		1.84	1.3472	1.3195	1.3602		1.3276	1.431	1.3569		1.3659	1.4025	1.383		1.3936	1.3374	1.3521
1.85	1.3195	1.4188	1.2186		1.3146	1.1811	1.2918		1.3626	1.5002	1.4326		1.85	1.3488	1.3089	1.3814		1.3293	1.4229	1.3594		1.3341	1.3985	1.3814		1.3985	1.3431	1.3244
1.86	1.3195	1.4375	1.2202		1.3187	1.1819	1.2926		1.3724	1.4839	1.4204		1.86	1.3398	1.2959	1.3895		1.3374	1.4294	1.3447		1.3309	1.4025	1.3643		1.4009	1.3521	1.3122
1.87	1.3016	1.4514	1.212		1.3138	1.186	1.2837		1.3724	1.4831	1.4123		1.87	1.3439	1.2975	1.3838		1.3488	1.4131	1.3472		1.3317	1.4147	1.3748		1.3911	1.3521	1.3219
1.88	1.2967	1.4489	1.2104		1.3317	1.2031	1.2658		1.3854	1.4921	1.4172		1.88	1.3496	1.2902	1.3797		1.3423	1.4164	1.3341		1.3447	1.4164	1.3724		1.3724	1.3504	1.339
1.89	1.3097	1.4375	1.2169		1.3407	1.195	1.2593		1.3895	1.4904	1.4221		1.89	1.3529	1.2983	1.3683		1.3301	1.4155	1.3333		1.3366	1.4147	1.3732		1.3643	1.3455	1.3602
1.9	1.3081	1.4212	1.2137		1.361	1.1933	1.269		1.396	1.4864	1.4245		1.9	1.3439	1.3057	1.361		1.3252	1.4269	1.339		1.3431	1.4009	1.3643		1.3651	1.3333	1.3635
1.91	1.3179	1.418	1.2137		1.3415	1.177	1.2682		1.3757	1.4766	1.4286		1.91	1.3488	1.3171	1.3561		1.3284	1.4204	1.339		1.3398	1.3976	1.3586		1.3822	1.335	1.3716
1.92	1.3016	1.4131	1.2063		1.3325	1.1844	1.2853		1.3659	1.475	1.4383		1.92	1.3618	1.3236	1.3553		1.3105	1.4066	1.3431		1.3341	1.3919	1.3716		1.3716	1.3284	1.3708
1.93	1.3008	1.4098	1.2226		1.3268	1.1884	1.2918		1.3643	1.4823	1.4481		1.93	1.3797	1.3138	1.3561		1.3065	1.3936	1.3415		1.3382	1.4017	1.3879		1.3732	1.3431	1.3643
1.94	1.2918	1.4139	1.2275		1.3382	1.1836	1.3057		1.3683	1.4921	1.4432		1.94	1.3691	1.3114	1.3626		1.3048	1.3928	1.3415		1.3455	1.4058	1.3968		1.3545	1.3496	1.3659
1.95	1.2853	1.418	1.2324		1.339	1.1844	1.2845		1.3586	1.5018	1.4457		1.95	1.3553	1.3162	1.3586		1.3187	1.3928	1.3333		1.3586	1.4123	1.4009		1.3659	1.348	1.3569
1.96	1.2837	1.4318	1.2332		1.3341	1.1901	1.2658		1.361	1.4961	1.4473		1.96	1.3341	1.3203	1.3635		1.326	1.3993	1.3236		1.3496	1.4196	1.4042		1.3765	1.3626	1.3545
1.97	1.2812	1.4237	1.2365		1.3374	1.2031	1.2593		1.37	1.4872	1.4457		1.97	1.3423	1.3228	1.3594		1.3341	1.4131	1.3301		1.3545	1.4343	1.4058		1.3911	1.3659	1.3366
1.98	1.2934	1.4253	1.2381		1.348	1.2047	1.2633		1.3797	1.4839	1.4269		1.98	1.3586	1.3162	1.3602		1.335	1.4245	1.339		1.348	1.4221	1.4001		1.3993	1.3691	1.3293
1.99	1.3114	1.4147	1.2332		1.3504	1.1917	1.2698		1.3708	1.475	1.4188		1.99	1.3594	1.3008	1.348		1.3317	1.4294	1.3472		1.3439	1.4123	1.3968		1.3838	1.3594	1.3439
2	1.3211	1.4155	1.2234		1.3464	1.177	1.2707		1.3618	1.4896	1.4098		2	1.3398	1.2934	1.3464		1.335	1.4245	1.3415		1.3268	1.3976	1.4066		1.3789	1.3455	1.3545
2.01	1.3268	1.4123	1.2234		1.3407	1.1656	1.2755		1.3537	1.5075	1.4131		2.01	1.3398	1.2902	1.3374		1.3496	1.4204	1.3293		1.3179	1.4155	1.4139		1.37	1.3464	1.3691
2.02	1.3138	1.4107	1.2234		1.3284	1.1608	1.2926		1.3553	1.5214	1.4098		2.02	1.3398	1.3048	1.3317		1.3594	1.4131	1.3341		1.3105	1.4139	1.4058		1.3789	1.3447	1.3569
2.03	1.2991	1.4253	1.2234		1.3244	1.1746	1.2959		1.3643	1.5059	1.4172		2.03	1.3561	1.3081	1.3301		1.3521	1.4001	1.3423		1.3179	1.4107	1.3985		1.3675	1.3659	1.3561
2.04	1.2926	1.4221	1.2202		1.3244	1.1803	1.2975		1.3602	1.4856	1.4139		2.04	1.3553	1.3081	1.3439		1.3407	1.3968	1.3537		1.3252	1.4107	1.3968		1.37	1.3667	1.3455
2.05	1.2845	1.4359	1.2194		1.3293	1.1893	1.2821		1.3683	1.4856	1.4155		2.05	1.3626	1.3032	1.3578		1.3268	1.3985	1.3431		1.3439	1.4058	1.4147		1.3659	1.3578	1.3512
2.06	1.2943	1.4229	1.2218		1.3276	1.1941	1.2715		1.3708	1.4953	1.4082		2.06	1.3643	1.2991	1.3578		1.3236	1.4196	1.3358		1.3309	1.4107	1.4115		1.3773	1.3464	1.3578
2.07	1.2926	1.4221	1.2161		1.3301	1.2112	1.2772		1.3822	1.4953	1.4221		2.07	1.3626	1.2951	1.3496		1.3358	1.4351	1.3382		1.3301	1.4017	1.4017		1.3789	1.3537	1.3659
2.08	1.2886	1.396	1.2137		1.3301	1.2226	1.2877		1.3854	1.4872	1.4326		2.08	1.3675	1.2902	1.3602		1.339	1.4367	1.3366		1.3138	1.4212	1.3757		1.374	1.3651	1.3618
2.09	1.2959	1.3928	1.2153		1.3325	1.2177	1.3081		1.3618	1.4799	1.4383		2.09	1.3553	1.2991	1.3602		1.3374	1.4278	1.3374		1.3211	1.4221	1.3724		1.3626	1.3626	1.3675
2.1	1.2983	1.3993	1.2177		1.3171	1.2039	1.3057		1.3521	1.4961	1.4302		2.1	1.3447	1.3	1.3748		1.3293	1.4058	1.3284		1.3244	1.4269	1.3797		1.3464	1.3545	1.3586
2.11	1.3146	1.4123	1.2186		1.3236	1.1941	1.2967		1.3455	1.5189	1.4196		2.11	1.3252	1.3048	1.3691		1.3293	1.4009	1.3407		1.3293	1.4155	1.3838		1.3504	1.3488	1.3529
2.12	1.2983	1.4115	1.2234		1.3309	1.2072	1.2967		1.3529	1.5295	1.4302		2.12	1.3219	1.291	1.37		1.3236	1.396	1.3561		1.339	1.4164	1.3871		1.3635	1.3569	1.3439
2.13	1.2877	1.4131	1.2218		1.3472	1.2161	1.3105		1.3643	1.5222	1.4383		2.13	1.3219	1.2967	1.3472		1.3301	1.4058	1.361		1.3382	1.4318	1.3765		1.37	1.3553	1.3447
2.14	1.2731	1.4253	1.234		1.3529	1.2324	1.3179		1.361	1.5051	1.4408		2.14	1.3333	1.2967	1.3398		1.3301	1.4212	1.3496		1.3431	1.4302	1.3797		1.3659	1.3618	1.3472
2.15	1.2788	1.4196	1.243		1.361	1.2308	1.3179		1.3724	1.4986	1.4294		2.15	1.3512	1.3203	1.3415		1.3415	1.4318	1.335		1.348	1.4375	1.3773		1.3618	1.3569	1.3504
2.16	1.2926	1.405	1.247		1.3675	1.2283	1.3048		1.3773	1.4961	1.4253		2.16	1.3464	1.3171	1.3545		1.3382	1.4294	1.335		1.3724	1.4269	1.3887		1.374	1.374	1.3496
2.17	1.3057	1.3936	1.2389		1.3667	1.2186	1.3048		1.3757	1.5002	1.4253		2.17	1.3382	1.3203	1.3594		1.3439	1.4123	1.3317		1.3838	1.4392	1.4033		1.405	1.3789	1.361
2.18	1.3195	1.4123	1.2169		1.3578	1.2145	1.3048		1.374	1.5181	1.4245		2.18	1.3195	1.3016	1.3586		1.3374	1.4001	1.3293		1.3789	1.4457	1.4074		1.4221	1.3618	1.3553
2.19	1.326	1.4115	1.2169		1.3594	1.2055	1.3008		1.383	1.5083	1.4237		2.19	1.3228	1.3016	1.3569		1.3236	1.3952	1.3219		1.3635	1.4432	1.4025		1.4107	1.3512	1.3651
2.2	1.3195	1.4001	1.2096		1.3675	1.1998	1.2975		1.3952	1.4961	1.4025		2.2	1.3301	1.3016	1.3626		1.3219	1.4017	1.3325		1.3594	1.418	1.4001		1.3976	1.3618	1.3545
2.21	1.3073	1.3879	1.2072		1.3797	1.186	1.2853		1.3919	1.475	1.3936		2.21	1.348	1.3114	1.3537		1.3301	1.4164	1.3398		1.3659	1.3976	1.4074		1.3797	1.3773	1.3553
2.22	1.2934	1.3944	1.2047		1.383	1.1648	1.2853		1.3675	1.4717	1.4001		2.22	1.3488	1.3114	1.3431		1.3293	1.4172	1.3488		1.3667	1.3911	1.4042		1.3919	1.3675	1.3488
2.23	1.3008	1.4147	1.2063		1.3708	1.1624	1.2829		1.3594	1.4872	1.405		2.23	1.3537	1.3032	1.335		1.3252	1.4172	1.3455		1.3618	1.4017	1.3968		1.3822	1.3439	1.3407
2.24	1.3048	1.4155	1.2104		1.3496	1.1689	1.2869		1.3496	1.4888	1.4188		2.24	1.3521	1.2861	1.3447		1.313	1.4066	1.3447		1.3675	1.4123	1.3757		1.3846	1.3374	1.326
2.25	1.3073	1.4115	1.212		1.3374	1.1876	1.2788		1.3659	1.5043	1.4164		2.25	1.3537	1.2755	1.361		1.3122	1.409	1.3366		1.37	1.4164	1.3789		1.3765	1.3317	1.3179
2.26	1.2959	1.4082	1.2145		1.3366	1.1901	1.2707		1.3748	1.5157	1.4392		2.26	1.3529	1.291	1.3781		1.3146	1.4074	1.3341		1.3691	1.4107	1.3773		1.3732	1.3293	1.3358
2.27	1.2837	1.4131	1.2169		1.348	1.1917	1.2658		1.3879	1.5222	1.4473		2.27	1.3472	1.2983	1.3814		1.3407	1.4033	1.3341		1.3464	1.4139	1.3928		1.3716	1.335	1.3504
2.28	1.2796	1.4245	1.2161		1.335	1.2072	1.2755		1.3716	1.5173	1.4473		2.28	1.3594	1.3097	1.3805		1.3529	1.4066	1.3415		1.3276	1.4245	1.4042		1.3781	1.3504	1.3569
2.29	1.2926	1.4172	1.2129		1.3398	1.2251	1.2918		1.3618	1.4961	1.4245		2.29	1.3545	1.2926	1.374		1.3594	1.4042	1.3521		1.3203	1.4392	1.4123		1.3789	1.37	1.3398
2.3	1.3114	1.4155	1.2243		1.3398	1.2373	1.304		1.3561	1.4717	1.4123		2.3	1.3488	1.2951	1.3578		1.3529	1.4107	1.3545		1.3252	1.4408	1.4139		1.3871	1.3651	1.3439
2.31	1.3048	1.409	1.2275		1.3659	1.221	1.3024		1.3757	1.4693	1.4082		2.31	1.339	1.2967	1.3472		1.3529	1.4001	1.3447		1.3374	1.4465	1.4074		1.3789	1.3561	1.3537
2.32	1.3065	1.4229	1.2202		1.361	1.2055	1.2967		1.3814	1.4693	1.4229		2.32	1.3309	1.3081	1.3309		1.3521	1.4082	1.3333		1.3366	1.4465	1.4058		1.3814	1.3374	1.3594
2.33	1.2869	1.4188	1.2007		1.3496	1.1958	1.2967		1.3732	1.4929	1.4286		2.33	1.326	1.3146	1.3423		1.3545	1.4115	1.3293		1.3447	1.4383	1.4009		1.3797	1.3333	1.3529
2.34	1.2983	1.4269	1.1958		1.3382	1.2088	1.3097		1.3683	1.5132	1.4326		2.34	1.3089	1.3089	1.3447		1.3529	1.4204	1.335		1.335	1.4253	1.4009		1.3838	1.3366	1.3398
2.35	1.2975	1.4058	1.2007		1.3366	1.1966	1.3081		1.3602	1.5189	1.4221		2.35	1.3203	1.3187	1.3512		1.3374	1.4139	1.3268		1.3382	1.4237	1.3862		1.383	1.3488	1.3455
2.36	1.3057	1.4009	1.212		1.3488	1.1844	1.3048		1.3626	1.501	1.4082		2.36	1.3358	1.3048	1.3472		1.3301	1.4025	1.3236		1.3252	1.4286	1.3838		1.3846	1.3667	1.3382
2.37	1.3048	1.3928	1.2104		1.348	1.173	1.2967		1.3635	1.4725	1.4107		2.37	1.3569	1.3195	1.3545		1.3382	1.4001	1.3293		1.3382	1.418	1.3757		1.3748	1.3732	1.3398
2.38	1.2991	1.4058	1.2055		1.3512	1.1901	1.2967		1.3675	1.4709	1.4237		2.38	1.3455	1.3097	1.3594		1.3561	1.405	1.3407		1.3578	1.4155	1.3976		1.3757	1.3643	1.3309
2.39	1.2951	1.3952	1.1974		1.3496	1.1901	1.2861		1.3691	1.4807	1.4367		2.39	1.3431	1.3171	1.3569		1.3464	1.4188	1.3553		1.3618	1.3993	1.3871		1.3789	1.348	1.3382
2.4	1.2926	1.3944	1.2023		1.3455	1.1844	1.2812		1.3732	1.4815	1.4351		2.4	1.3317	1.2967	1.3553		1.3431	1.418	1.3512		1.3586	1.3928	1.3895		1.3903	1.3407	1.3325
2.41	1.2934	1.3911	1.2072		1.3447	1.1722	1.2804		1.383	1.4676	1.4204		2.41	1.3431	1.304	1.3545		1.3268	1.418	1.3447		1.3455	1.383	1.3529		1.383	1.3504	1.3317
2.42	1.2934	1.4042	1.2096		1.3423	1.1722	1.2918		1.396	1.4831	1.4155		2.42	1.3447	1.3065	1.3659		1.3398	1.4131	1.3398		1.3407	1.3985	1.3553		1.3683	1.3569	1.3358
2.43	1.2991	1.4001	1.2039		1.3455	1.1819	1.2975		1.383	1.4937	1.4164		2.43	1.3521	1.3293	1.3757		1.3293	1.4261	1.348		1.3521	1.4131	1.3521		1.3537	1.3667	1.3455
2.44	1.3065	1.4131	1.2096		1.3594	1.1909	1.3		1.374	1.5124	1.418		2.44	1.3578	1.326	1.3748		1.339	1.4188	1.3488		1.3578	1.4294	1.396		1.3643	1.3708	1.3496
2.45	1.304	1.4294	1.2137		1.3602	1.199	1.2926		1.3659	1.5157	1.4253		2.45	1.3521	1.3154	1.3789		1.3325	1.4139	1.3488		1.3602	1.4196	1.4066		1.3797	1.3732	1.3447
2.46	1.2991	1.4383	1.2357		1.3626	1.2063	1.2943		1.3635	1.5254	1.4286		2.46	1.3529	1.3105	1.3838		1.348	1.4042	1.3415		1.3626	1.4172	1.4155		1.3887	1.3748	1.3423
2.47	1.2869	1.4383	1.2381		1.3578	1.2145	1.2934		1.3618	1.5181	1.4261		2.47	1.3333	1.3089	1.3879		1.3464	1.418	1.3455		1.3651	1.4066	1.4042		1.3781	1.3683	1.3374
2.48	1.2869	1.4229	1.2414		1.3708	1.2145	1.2869		1.3797	1.4978	1.4326		2.48	1.3293	1.3057	1.3781		1.3472	1.4229	1.3276		1.3773	1.4058	1.4058		1.3789	1.37	1.3407
2.49	1.2886	1.4294	1.212		1.3675	1.1982	1.2764		1.3846	1.4929	1.431		2.49	1.3236	1.3081	1.3504		1.3268	1.4155	1.3146		1.361	1.4042	1.405		1.3814	1.3626	1.3374
2.5	1.2869	1.418	1.2063		1.3635	1.1958	1.2739		1.3976	1.4961	1.4416		2.5	1.3301	1.313	1.348		1.3276	1.4017	1.3122		1.3594	1.4074	1.383		1.3854	1.3586	1.3431
2.51	1.2886	1.4367	1.208		1.3496	1.2063	1.2845		1.3985	1.5124	1.4335		2.51	1.3325	1.3154	1.3529		1.3325	1.396	1.3203		1.3415	1.4229	1.3691		1.3862	1.3431	1.3358
2.52	1.2975	1.4253	1.2308		1.3578	1.2153	1.2991		1.4082	1.5059	1.44		2.52	1.3325	1.2902	1.3675		1.3455	1.3985	1.3276		1.3374	1.4392	1.3643		1.3968	1.3472	1.3447
2.53	1.2975	1.4237	1.2357		1.3602	1.2145	1.3		1.3838	1.5051	1.4351		2.53	1.3341	1.2845	1.3651		1.3398	1.4033	1.335		1.3382	1.4424	1.3748		1.405	1.3423	1.3537
2.54	1.3032	1.4001	1.2332		1.3635	1.212	1.3024		1.3569	1.4937	1.4245		2.54	1.3398	1.2983	1.3618		1.3309	1.4098	1.3455		1.3545	1.4359	1.3846		1.4107	1.3423	1.3586
2.55	1.2951	1.3993	1.2259		1.3561	1.2145	1.3024		1.3561	1.501	1.409		2.55	1.3545	1.3276	1.3594		1.3293	1.4188	1.3488		1.3594	1.431	1.3936		1.4139	1.339	1.3431
2.56	1.3105	1.396	1.2202		1.3447	1.2096	1.3008		1.37	1.4929	1.4261		2.56	1.3569	1.3211	1.3594		1.3309	1.4212	1.3423		1.3561	1.431	1.3993		1.4042	1.3447	1.3382
2.57	1.3081	1.3952	1.2145		1.3415	1.1933	1.304		1.3887	1.4969	1.4383		2.57	1.3496	1.3219	1.37		1.3309	1.4172	1.3252		1.3504	1.4237	1.3985		1.3928	1.3602	1.3512
2.58	1.3162	1.396	1.2137		1.3415	1.2015	1.2983		1.3814	1.4896	1.4457		2.58	1.3423	1.2951	1.3667		1.3138	1.4164	1.3284		1.361	1.4164	1.3789		1.383	1.361	1.3748
2.59	1.3073	1.3976	1.2194		1.3651	1.212	1.313		1.383	1.4994	1.4408		2.59	1.335	1.2967	1.3748		1.3081	1.4115	1.326		1.3651	1.3985	1.3635		1.3879	1.3569	1.3708
2.6	1.3024	1.4033	1.2169		1.374	1.2194	1.3162		1.3724	1.4929	1.4286		2.6	1.3341	1.2918	1.3586		1.3016	1.4123	1.339		1.3651	1.4042	1.3618		1.3773	1.3496	1.3626
2.61	1.2902	1.4017	1.2177		1.3838	1.2153	1.3097		1.3683	1.488	1.4212		2.61	1.3333	1.313	1.3529		1.3187	1.4098	1.335		1.3537	1.4017	1.3732		1.3773	1.3455	1.3594
2.62	1.2894	1.4009	1.2234		1.3691	1.2088	1.2983		1.3814	1.4831	1.4139		2.62	1.3317	1.3293	1.3415		1.3358	1.3993	1.3374		1.3447	1.4123	1.3911		1.383	1.3529	1.3651
2.63	1.2918	1.4066	1.234		1.3716	1.2047	1.2934		1.3822	1.4953	1.4286		2.63	1.3407	1.3301	1.3578		1.3407	1.396	1.3382		1.3553	1.405	1.3936		1.405	1.3602	1.3561
2.64	1.2959	1.4017	1.234		1.3594	1.1958	1.2975		1.3814	1.5026	1.4343		2.64	1.3398	1.3179	1.3635		1.3358	1.3911	1.3333		1.3545	1.4001	1.3985		1.4139	1.361	1.3374
2.65	1.2861	1.4066	1.2357		1.3586	1.186	1.2886		1.3765	1.5132	1.4172		2.65	1.348	1.3024	1.3773		1.3309	1.3887	1.3284		1.3545	1.4025	1.3968		1.4033	1.3472	1.3333
2.66	1.2853	1.4058	1.2422		1.3586	1.1893	1.2796		1.3814	1.5043	1.4131		2.66	1.3586	1.3032	1.374		1.3317	1.383	1.3236		1.3415	1.4025	1.4033		1.4009	1.3301	1.3293
2.67	1.2853	1.4212	1.2527		1.361	1.1909	1.2764		1.3879	1.4961	1.4155		2.67	1.3504	1.3032	1.3895		1.3398	1.4009	1.3284		1.335	1.4253	1.4009		1.3936	1.335	1.3447
2.68	1.3032	1.4131	1.2576		1.3512	1.1933	1.2877		1.3789	1.4872	1.431		2.68	1.3569	1.3073	1.3781		1.3472	1.4237	1.3203		1.326	1.4221	1.383		1.405	1.3545	1.3488
2.69	1.3097	1.4042	1.2503		1.3382	1.2088	1.2853		1.3748	1.4888	1.4172		2.69	1.3439	1.3097	1.3691		1.3545	1.4302	1.3252		1.3317	1.4261	1.3626		1.4009	1.3618	1.3529
2.7	1.3073	1.3976	1.243		1.3358	1.208	1.2894		1.3773	1.4969	1.4009		2.7	1.348	1.3228	1.3512		1.3512	1.4147	1.3293		1.3496	1.4221	1.3569		1.4009	1.3643	1.3472
2.71	1.2902	1.4082	1.234		1.326	1.2186	1.2975		1.3797	1.5059	1.4139		2.71	1.3374	1.3195	1.3488		1.3374	1.4066	1.3333		1.3545	1.4261	1.3635		1.4042	1.3545	1.339
2.72	1.2894	1.4172	1.2283		1.3179	1.2055	1.3146		1.3854	1.5018	1.4318		2.72	1.3252	1.3138	1.3512		1.3374	1.4074	1.3236		1.348	1.4318	1.3716		1.4066	1.3545	1.3398
2.73	1.3008	1.4131	1.2169		1.3244	1.2169	1.3179		1.3895	1.5083	1.4432		2.73	1.3211	1.3016	1.3537		1.3293	1.4025	1.3211		1.339	1.4245	1.3871		1.3944	1.3382	1.3358
2.74	1.3187	1.4155	1.2039		1.3382	1.212	1.2991		1.3887	1.5083	1.4473		2.74	1.3089	1.2983	1.3578		1.3301	1.4001	1.3293		1.3415	1.4269	1.3976		1.3797	1.3268	1.3366
2.75	1.3122	1.4058	1.2047		1.3626	1.221	1.2877		1.3903	1.5149	1.4318		2.75	1.3162	1.3032	1.3618		1.3301	1.396	1.3203		1.3472	1.4164	1.4074		1.3757	1.3219	1.3464
2.76	1.2918	1.4098	1.2177		1.3659	1.2186	1.2861		1.3854	1.5197	1.4416		2.76	1.3122	1.3114	1.3561		1.335	1.3968	1.3309		1.3464	1.4074	1.3952		1.383	1.3293	1.3659
2.77	1.2853	1.4115	1.2308		1.383	1.2194	1.2959		1.3732	1.5238	1.4294		2.77	1.3358	1.3219	1.3561		1.3496	1.3887	1.3317		1.3333	1.4066	1.3724		1.3895	1.3374	1.3683
2.78	1.2861	1.4261	1.23		1.3724	1.2161	1.3089		1.3643	1.5295	1.4375		2.78	1.3464	1.3146	1.3578		1.339	1.4001	1.3398		1.326	1.4196	1.3683		1.3822	1.3512	1.3635
2.79	1.2918	1.431	1.2267		1.3691	1.2177	1.3081		1.3602	1.5336	1.4278		2.79	1.3488	1.3097	1.3667		1.3569	1.4172	1.3268		1.3268	1.4367	1.3805		1.3879	1.3472	1.3504
2.8	1.2975	1.4302	1.2251		1.3708	1.2218	1.3122		1.3748	1.5263	1.4269		2.8	1.3431	1.3114	1.3675		1.348	1.4302	1.3219		1.348	1.4335	1.3993		1.3838	1.3423	1.3545
2.81	1.2951	1.4383	1.2202		1.3781	1.2308	1.3097		1.383	1.5222	1.4139		2.81	1.3358	1.3179	1.361		1.3545	1.4188	1.3244		1.3578	1.431	1.3985		1.3838	1.3398	1.3521
2.82	1.2918	1.4489	1.2186		1.3708	1.2186	1.3154		1.3936	1.5108	1.409		2.82	1.3325	1.3284	1.3659		1.339	1.3976	1.3252		1.361	1.4155	1.4017		1.3773	1.3537	1.348
2.83	1.278	1.444	1.2234		1.3529	1.2145	1.3105		1.4001	1.5083	1.4074		2.83	1.3325	1.3284	1.3683		1.3333	1.4074	1.3333		1.3464	1.4123	1.3968		1.3846	1.3773	1.3537
2.84	1.2967	1.4351	1.2365		1.3472	1.1982	1.3089		1.4009	1.5075	1.4123		2.84	1.3398	1.3341	1.3683		1.3284	1.4042	1.3293		1.3423	1.3993	1.4009		1.4017	1.3871	1.3708
2.85	1.2926	1.4139	1.2316		1.3537	1.1974	1.3179		1.3928	1.5051	1.4294		2.85	1.3545	1.335	1.3651		1.3301	1.4147	1.3276		1.3333	1.4074	1.3903		1.4009	1.3862	1.3838
2.86	1.2975	1.4261	1.2243		1.3537	1.195	1.3398		1.3887	1.5059	1.4351		2.86	1.3447	1.326	1.3586		1.3317	1.4131	1.3341		1.3431	1.409	1.4017		1.4074	1.3838	1.3879
2.87	1.2886	1.4375	1.2104		1.3561	1.2072	1.3333		1.3928	1.5083	1.4335		2.87	1.3325	1.3219	1.3496		1.3366	1.4286	1.3455		1.3407	1.4172	1.3952		1.3846	1.3838	1.3797
2.88	1.3089	1.4481	1.212		1.3529	1.2218	1.3105		1.4001	1.5246	1.4212		2.88	1.3219	1.3211	1.339		1.3423	1.4245	1.3431		1.3423	1.4172	1.4033		1.3846	1.3789	1.3854
2.89	1.3211	1.4375	1.208		1.3643	1.2194	1.2886		1.3976	1.5254	1.4147		2.89	1.335	1.3032	1.3431		1.3464	1.4115	1.3341		1.3447	1.4286	1.4009		1.3675	1.374	1.3781
2.9	1.3146	1.4155	1.2072		1.3618	1.2137	1.2967		1.3968	1.5319	1.4286		2.9	1.3496	1.2926	1.3561		1.3455	1.4042	1.3309		1.3578	1.4269	1.4204		1.3822	1.374	1.3862
2.91	1.3016	1.405	1.2096		1.3578	1.2088	1.3057		1.3822	1.5181	1.4335		2.91	1.37	1.2707	1.3765		1.3293	1.4042	1.3301		1.3748	1.4237	1.4123		1.3887	1.3862	1.3854
2.92	1.2902	1.4066	1.2112		1.3423	1.2015	1.3089		1.3781	1.5132	1.4294		2.92	1.3659	1.2894	1.3724		1.3268	1.4025	1.3358		1.3814	1.4147	1.4131		1.4009	1.3765	1.3944
2.93	1.3016	1.4001	1.2096		1.3293	1.2129	1.2975		1.3675	1.4961	1.4367		2.93	1.3765	1.2983	1.3651		1.3309	1.3976	1.3382		1.3626	1.4115	1.4115		1.4001	1.3675	1.3911
2.94	1.3154	1.3936	1.2047		1.3276	1.2202	1.2943		1.3911	1.4888	1.4302		2.94	1.3651	1.3024	1.3537		1.3374	1.4139	1.339		1.3594	1.4082	1.3993		1.3903	1.3626	1.3765
2.95	1.3081	1.4025	1.2153		1.3464	1.2365	1.2902		1.4123	1.4945	1.4253		2.95	1.3586	1.2991	1.3569		1.3439	1.4139	1.3382		1.3553	1.405	1.3887		1.3985	1.3586	1.361
2.96	1.3	1.418	1.234		1.374	1.2324	1.2804		1.431	1.5132	1.4058		2.96	1.3252	1.2967	1.3675		1.3431	1.405	1.3374		1.3691	1.4033	1.3757		1.3928	1.3504	1.3496
2.97	1.2991	1.4302	1.2568		1.4017	1.2267	1.278		1.4294	1.5238	1.4017		2.97	1.3195	1.2975	1.3659		1.3512	1.3952	1.3455		1.3545	1.4131	1.3862		1.396	1.3504	1.3553
2.98	1.3057	1.4172	1.2601		1.405	1.2291	1.2902		1.4318	1.5271	1.4033		2.98	1.3219	1.3032	1.3635		1.3496	1.3895	1.3415		1.3439	1.4269	1.4017		1.3879	1.361	1.3545
2.99	1.3081	1.4131	1.2617		1.4009	1.2381	1.3089		1.4294	1.5206	1.4098		2.99	1.3317	1.3008	1.3626		1.3333	1.4017	1.3276		1.3529	1.4294	1.4082		1.3911	1.3586	1.3626
3	1.2812	1.4139	1.2479		1.3862	1.2397	1.3187		1.418	1.5222	1.4204		3	1.3447	1.3187	1.3757		1.3309	1.4033	1.3203		1.3643	1.4286	1.4139		1.4025	1.3439	1.3569
3.01	1.2821	1.4294	1.2373		1.3781	1.2332	1.3162		1.4033	1.5246	1.4229		3.01	1.3464	1.3114	1.3814		1.3301	1.4098	1.3211		1.3748	1.4221	1.409		1.3976	1.3374	1.3635
3.02	1.2837	1.4408	1.2414		1.3683	1.2129	1.3179		1.4082	1.5328	1.4261		3.02	1.3537	1.3219	1.3846		1.3496	1.409	1.3358		1.3765	1.4269	1.4009		1.4082	1.3561	1.3569
3.03	1.3089	1.444	1.2275		1.3789	1.2047	1.3187		1.4147	1.5271	1.4432		3.03	1.3529	1.3228	1.3773		1.3455	1.4058	1.3374		1.3781	1.4172	1.4017		1.3968	1.361	1.3675
3.04	1.3081	1.4286	1.2202		1.3871	1.2169	1.313		1.4123	1.5197	1.4538		3.04	1.3594	1.3333	1.3789		1.3569	1.4164	1.3333		1.3732	1.4164	1.4009		1.3846	1.37	1.3708
3.05	1.3008	1.4261	1.2047		1.383	1.2251	1.3162		1.396	1.5181	1.4481		3.05	1.3618	1.3228	1.3586		1.3537	1.4164	1.3325		1.3643	1.4155	1.396		1.3643	1.3651	1.3651
3.06	1.2934	1.4359	1.1998		1.3651	1.2291	1.3219		1.3985	1.5173	1.4261		3.06	1.3635	1.3236	1.3578		1.3423	1.4058	1.3382		1.3651	1.4196	1.3911		1.3635	1.3765	1.3398
3.07	1.291	1.4383	1.2023		1.3407	1.2177	1.3398		1.4042	1.5206	1.4294		3.07	1.3724	1.3309	1.3537		1.3252	1.4025	1.361		1.361	1.4269	1.3944		1.37	1.3724	1.3317
3.08	1.2983	1.4367	1.199		1.3455	1.2275	1.3447		1.4058	1.5132	1.4318		3.08	1.3765	1.3366	1.3716		1.3358	1.4082	1.3708		1.3496	1.431	1.4017		1.3765	1.3716	1.3374
3.09	1.2959	1.4351	1.2161		1.3496	1.2332	1.3301		1.3919	1.5279	1.4351		3.09	1.3716	1.3293	1.3716		1.3553	1.4115	1.3667		1.339	1.4465	1.3993		1.3871	1.3618	1.3626
3.1	1.2943	1.4335	1.2348		1.37	1.23	1.3179		1.3911	1.5311	1.4286		3.1	1.37	1.3333	1.3911		1.3675	1.4058	1.3561		1.3447	1.4465	1.3968		1.3936	1.3651	1.374
3.11	1.2926	1.4343	1.2544		1.3716	1.2194	1.3162		1.4009	1.5263	1.4261		3.11	1.3626	1.3447	1.3781		1.3618	1.405	1.3569		1.3431	1.4522	1.4017		1.4107	1.3578	1.3667
3.12	1.2943	1.431	1.2633		1.3895	1.2039	1.3309		1.409	1.5132	1.4245		3.12	1.3748	1.3423	1.3773		1.37	1.4115	1.3569		1.3545	1.4294	1.409		1.4033	1.3578	1.3488
3.13	1.291	1.4359	1.256		1.3911	1.1998	1.3293		1.4058	1.5075	1.4245		3.13	1.3569	1.3203	1.3504		1.3675	1.4074	1.3333		1.3586	1.4261	1.3968		1.3919	1.348	1.3537
3.14	1.2829	1.4359	1.2511		1.4025	1.1998	1.3325		1.3919	1.5116	1.4326		3.14	1.3618	1.313	1.3529		1.3724	1.3895	1.3244		1.37	1.4147	1.3887		1.3773	1.3512	1.3496
3.15	1.2983	1.4367	1.247		1.3919	1.2104	1.3228		1.3993	1.5189	1.4408		3.15	1.3512	1.3219	1.3488		1.3626	1.3911	1.3228		1.3594	1.4204	1.3895		1.396	1.3488	1.3464
3.16	1.3024	1.4326	1.2503		1.3879	1.2202	1.3358		1.4017	1.536	1.4269		3.16	1.361	1.3374	1.3635		1.3537	1.3903	1.3374		1.3407	1.4294	1.3993		1.4131	1.3569	1.3187
3.17	1.3187	1.4392	1.2479		1.3903	1.23	1.3464		1.4196	1.545	1.4196		3.17	1.3464	1.3415	1.3773		1.3415	1.4074	1.3333		1.3407	1.4383	1.3928		1.4058	1.3553	1.3293
3.18	1.304	1.4383	1.2462		1.3968	1.2243	1.3447		1.4164	1.5523	1.4115		3.18	1.3374	1.339	1.3773		1.3366	1.4188	1.3317		1.3472	1.4457	1.3895		1.3911	1.3504	1.3398
3.19	1.3081	1.444	1.2316		1.3928	1.2169	1.3276		1.4408	1.545	1.4172		3.19	1.3423	1.3358	1.3724		1.3358	1.4351	1.3333		1.3545	1.4269	1.3919		1.3887	1.3439	1.3545
3.2	1.2943	1.4351	1.2259		1.3716	1.2129	1.3073		1.4294	1.5295	1.4245		3.2	1.3561	1.3211	1.3545		1.3333	1.4457	1.335		1.3472	1.418	1.4058		1.4001	1.339	1.3594
3.21	1.2902	1.431	1.2145		1.3675	1.23	1.3244		1.4237	1.5149	1.4522		3.21	1.3667	1.3252	1.3504		1.3317	1.4416	1.3439		1.3431	1.4033	1.4058		1.396	1.3586	1.3626
3.22	1.2812	1.4481	1.2283		1.3716	1.2397	1.3366		1.4033	1.5075	1.4807		3.22	1.3643	1.3309	1.3545		1.3464	1.4481	1.3496		1.3464	1.4082	1.4058		1.3911	1.3569	1.3659
3.23	1.2821	1.4514	1.2389		1.3643	1.2243	1.3431		1.4033	1.5287	1.4864		3.23	1.3602	1.3529	1.3667		1.3537	1.4359	1.3561		1.3415	1.418	1.3993		1.3919	1.37	1.3659
3.24	1.2926	1.466	1.2511		1.3569	1.2137	1.335		1.396	1.5433	1.453		3.24	1.3586	1.3578	1.3691		1.361	1.4294	1.3545		1.3447	1.444	1.3968		1.3993	1.3618	1.3667
3.25	1.3048	1.4424	1.2422		1.3586	1.2063	1.3366		1.3919	1.5539	1.4302		3.25	1.3504	1.3521	1.3529		1.3447	1.4082	1.3651		1.3521	1.4505	1.4025		1.396	1.3659	1.3586
3.26	1.3187	1.4375	1.2397		1.3814	1.2234	1.3358		1.3993	1.5458	1.4326		3.26	1.3455	1.3455	1.3447		1.3472	1.4042	1.3594		1.3626	1.444	1.4058		1.3797	1.3675	1.3569
3.27	1.3097	1.4318	1.2479		1.3944	1.2332	1.3252		1.418	1.5279	1.4318		3.27	1.3431	1.3301	1.3366		1.3407	1.4139	1.3716		1.361	1.4383	1.4082		1.383	1.37	1.3512
3.28	1.2959	1.4383	1.2479		1.3911	1.2487	1.3284		1.4107	1.5181	1.4375		3.28	1.3594	1.3317	1.3447		1.339	1.4147	1.3545		1.3578	1.4302	1.4082		1.3919	1.3724	1.3708
3.29	1.291	1.4473	1.243		1.3862	1.2454	1.3317		1.3993	1.5173	1.4318		3.29	1.3675	1.3244	1.3504		1.3309	1.4164	1.3594		1.3651	1.4278	1.4164		1.3928	1.3683	1.3765
3.3	1.3048	1.4457	1.2291		1.3691	1.2397	1.3512		1.3846	1.5319	1.4595		3.3	1.3757	1.3284	1.3651		1.335	1.3952	1.3504		1.3675	1.418	1.4221		1.3814	1.3635	1.3781
3.31	1.3171	1.4416	1.2332		1.3569	1.23	1.3447		1.3944	1.5385	1.4628		3.31	1.3708	1.3252	1.374		1.3472	1.4009	1.3545		1.3952	1.4383	1.4155		1.3773	1.3635	1.3708
3.32	1.3048	1.4457	1.2381		1.3545	1.2251	1.3382		1.3968	1.5368	1.4603		3.32	1.3667	1.3333	1.3871		1.3512	1.4066	1.3529		1.3952	1.4392	1.4066		1.396	1.3651	1.3569
3.33	1.2886	1.453	1.2511		1.3561	1.2194	1.3211		1.4025	1.5409	1.4505		3.33	1.3545	1.3276	1.3887		1.3545	1.4188	1.3586		1.4107	1.431	1.3993		1.4155	1.3651	1.3594
3.34	1.2886	1.4693	1.2479		1.3724	1.2177	1.3236		1.3993	1.5417	1.4505		3.34	1.3407	1.3268	1.383		1.3455	1.4147	1.3643		1.3846	1.4139	1.4001		1.4229	1.3691	1.3488
3.35	1.2959	1.4579	1.2446		1.3659	1.2145	1.3276		1.4082	1.5458	1.4579		3.35	1.3407	1.3179	1.3814		1.3569	1.4155	1.3594		1.3846	1.4196	1.4017		1.4221	1.37	1.3594
3.36	1.3179	1.4538	1.2332		1.3618	1.2202	1.3374		1.4017	1.5442	1.4587		3.36	1.3472	1.313	1.3773		1.3602	1.4212	1.3374		1.3748	1.4318	1.409		1.4155	1.3854	1.3683
3.37	1.313	1.4392	1.2438		1.3626	1.2194	1.3276		1.4025	1.5376	1.4522		3.37	1.3521	1.3105	1.3748		1.3805	1.4253	1.3236		1.3748	1.44	1.4033		1.4221	1.3854	1.3854
3.38	1.3097	1.4408	1.2389		1.3797	1.2275	1.3252		1.3976	1.5254	1.44		3.38	1.3602	1.326	1.3667		1.3846	1.4318	1.3284		1.3683	1.4416	1.4139		1.4155	1.3854	1.3789
3.39	1.3016	1.4318	1.2422		1.4033	1.2218	1.3211		1.4221	1.5124	1.4188		3.39	1.3626	1.3415	1.3659		1.3773	1.4302	1.3512		1.3635	1.4294	1.4107		1.4155	1.3838	1.3773
3.4	1.2975	1.4424	1.2348		1.4074	1.2308	1.3154		1.4229	1.5108	1.4139		3.4	1.3716	1.3578	1.3643		1.3586	1.4408	1.3553		1.3602	1.4139	1.4123		1.4245	1.3814	1.3683
3.41	1.2951	1.4554	1.2414		1.4098	1.2177	1.3179		1.418	1.5263	1.4164		3.41	1.3635	1.3537	1.3724		1.3447	1.4302	1.3553		1.3716	1.4074	1.4082		1.4335	1.3789	1.3814
3.42	1.2902	1.4595	1.2365		1.4009	1.2275	1.3301		1.3928	1.5385	1.4383		3.42	1.3659	1.339	1.3854		1.3537	1.4098	1.3423		1.3683	1.4237	1.4082		1.431	1.37	1.3667
3.43	1.2951	1.4611	1.2397		1.383	1.2324	1.3537		1.3846	1.5442	1.4408		3.43	1.3635	1.3219	1.3805		1.3626	1.396	1.3512		1.3805	1.444	1.4172		1.4074	1.3814	1.3635
3.44	1.2959	1.4562	1.2365		1.3691	1.2576	1.3464		1.3944	1.5344	1.4505		3.44	1.37	1.3154	1.3765		1.3659	1.3928	1.3529		1.3805	1.4489	1.4139		1.4042	1.3773	1.3537
3.45	1.3	1.4505	1.2446		1.3651	1.2576	1.3358		1.405	1.5279	1.4343		3.45	1.37	1.3244	1.3781		1.3667	1.4131	1.3618		1.3757	1.4416	1.4123		1.4017	1.37	1.3691
3.46	1.2926	1.44	1.243		1.374	1.2446	1.3317		1.4204	1.5238	1.4375		3.46	1.3683	1.3398	1.3879		1.3675	1.4245	1.3626		1.3765	1.4375	1.3993		1.4098	1.3643	1.3716
3.47	1.3032	1.4318	1.2462		1.3781	1.2194	1.3325		1.4286	1.5197	1.4286		3.47	1.3716	1.3398	1.3765		1.3626	1.4278	1.3602		1.3659	1.4408	1.4033		1.4058	1.3683	1.3724
3.48	1.3057	1.4351	1.2462		1.3724	1.2153	1.3366		1.4278	1.5214	1.4351		3.48	1.3651	1.3382	1.3578		1.3529	1.4261	1.3472		1.3773	1.4497	1.4082		1.4098	1.383	1.3643
3.49	1.3284	1.4343	1.2487		1.3765	1.2202	1.3317		1.4229	1.5352	1.4367		3.49	1.3586	1.3211	1.3594		1.3504	1.4074	1.3333		1.3732	1.4449	1.4107		1.409	1.3724	1.3691
3.5	1.3284	1.4335	1.2503		1.3871	1.2389	1.3415		1.4278	1.5368	1.4367		3.5	1.3578	1.3187	1.3716		1.3586	1.405	1.3317		1.3773	1.44	1.4001		1.3985	1.3846	1.3643
3.51	1.3219	1.4286	1.2405		1.4009	1.2454	1.3415		1.4359	1.5393	1.4383		3.51	1.37	1.3236	1.3732		1.3659	1.3919	1.3488		1.3846	1.4335	1.3968		1.3838	1.3732	1.3626
3.52	1.3065	1.4278	1.2316		1.409	1.2503	1.3431		1.4408	1.5401	1.4457		3.52	1.3757	1.3333	1.383		1.3805	1.4115	1.3447		1.383	1.4351	1.4082		1.3683	1.374	1.3594
3.53	1.2991	1.4261	1.2381		1.3968	1.243	1.3341		1.4367	1.5531	1.4359		3.53	1.3724	1.335	1.3879		1.3781	1.4237	1.3439		1.3838	1.4546	1.405		1.3724	1.3708	1.3594
3.54	1.2804	1.4294	1.2446		1.4025	1.2365	1.3374		1.4359	1.545	1.4359		3.54	1.3675	1.3219	1.3919		1.3805	1.4383	1.335		1.3716	1.4652	1.4058		1.3822	1.3773	1.3602
3.55	1.2845	1.4367	1.2446		1.409	1.2291	1.3374		1.4196	1.5263	1.4269		3.55	1.3854	1.3162	1.3724		1.3748	1.4367	1.3521		1.3667	1.4717	1.4009		1.4058	1.3757	1.3553
3.56	1.2869	1.4424	1.2365		1.4131	1.234	1.3472		1.4237	1.5246	1.4424		3.56	1.3985	1.3138	1.3537		1.3805	1.4245	1.3545		1.3691	1.4603	1.4131		1.4204	1.3732	1.3651
3.57	1.3122	1.4449	1.2495		1.4147	1.2414	1.3455		1.4221	1.5279	1.4481		3.57	1.4066	1.3244	1.3553		1.3789	1.4221	1.3537		1.3732	1.4457	1.4155		1.418	1.3822	1.3643
3.58	1.3065	1.44	1.2544		1.4017	1.2511	1.3407		1.431	1.5442	1.4481		3.58	1.3936	1.3333	1.3643		1.3651	1.418	1.3569		1.3765	1.4326	1.4229		1.4025	1.3919	1.3708
3.59	1.3114	1.4489	1.2593		1.4155	1.2422	1.3464		1.4107	1.5336	1.4481		3.59	1.3887	1.3366	1.383		1.3675	1.4375	1.3537		1.3781	1.4155	1.4221		1.3936	1.3797	1.3635
3.6	1.2926	1.4628	1.247		1.4107	1.2438	1.3569		1.4058	1.5417	1.4375		3.6	1.37	1.3366	1.3936		1.3683	1.4278	1.3578		1.3732	1.4131	1.4123		1.3985	1.3643	1.3618
3.61	1.2943	1.4676	1.2487		1.4139	1.243	1.3691		1.4155	1.5295	1.4326		3.61	1.3683	1.3228	1.4082		1.3716	1.4351	1.348		1.3708	1.418	1.4017		1.4017	1.3651	1.3537
3.62	1.2926	1.4628	1.2609		1.4107	1.2495	1.3635		1.4229	1.5352	1.4278		3.62	1.3724	1.3244	1.4196		1.3529	1.4188	1.3407		1.3635	1.4424	1.4017		1.4042	1.3781	1.3626
3.63	1.3032	1.4733	1.2747		1.4115	1.2584	1.3415		1.4245	1.5328	1.4294		3.63	1.3805	1.3317	1.4172		1.3398	1.4269	1.3366		1.3561	1.4538	1.4017		1.4066	1.3911	1.3773
3.64	1.2991	1.4782	1.2821		1.4009	1.2593	1.3358		1.4139	1.5328	1.4375		3.64	1.3789	1.3455	1.4115		1.3407	1.4212	1.3415		1.3496	1.4611	1.4033		1.4123	1.3968	1.3879
3.65	1.2991	1.4799	1.265		1.3952	1.2568	1.3431		1.4229	1.5433	1.4383		3.65	1.374	1.3496	1.3928		1.3472	1.405	1.3431		1.3561	1.4579	1.4107		1.4139	1.3871	1.3789
3.66	1.3057	1.4603	1.2731		1.3985	1.2446	1.3537		1.4383	1.5572	1.4489		3.66	1.3854	1.3398	1.3911		1.3569	1.4009	1.3455		1.3765	1.4538	1.4221		1.4098	1.3871	1.3578
3.67	1.3089	1.4636	1.2755		1.4098	1.2438	1.3488		1.4497	1.567	1.4522		3.67	1.3936	1.3284	1.3789		1.3578	1.3985	1.3472		1.3903	1.4497	1.4302		1.4017	1.383	1.3512
3.68	1.3	1.466	1.278		1.4172	1.2446	1.3382		1.4465	1.5637	1.4628		3.68	1.3919	1.3317	1.3773		1.3553	1.4212	1.3626		1.3903	1.4359	1.4245		1.405	1.4001	1.3569
3.69	1.2886	1.4807	1.2584		1.4123	1.2454	1.3455		1.44	1.5507	1.4636		3.69	1.3805	1.3415	1.3797		1.3569	1.4343	1.3716		1.3968	1.4196	1.3985		1.4066	1.3976	1.37
3.7	1.2861	1.4807	1.2503		1.4139	1.2365	1.3537		1.444	1.5507	1.4497		3.7	1.383	1.3398	1.3919		1.3529	1.4351	1.3724		1.3968	1.4155	1.3952		1.4147	1.4025	1.3748
3.71	1.2788	1.4799	1.2593		1.4017	1.2527	1.3496		1.4514	1.5393	1.4335		3.71	1.3765	1.3374	1.4009		1.3578	1.4343	1.3708		1.3879	1.4229	1.3944		1.4164	1.3903	1.3814
3.72	1.2796	1.4685	1.2593		1.4066	1.2698	1.3464		1.4514	1.5319	1.4335		3.72	1.3748	1.339	1.3985		1.3537	1.431	1.3659		1.3765	1.4489	1.4131		1.4139	1.3911	1.3805
3.73	1.2861	1.4619	1.2641		1.4107	1.2788	1.3504		1.4408	1.5401	1.4449		3.73	1.3732	1.3464	1.3985		1.3602	1.444	1.3578		1.3765	1.4546	1.4107		1.4164	1.3903	1.374
3.74	1.2943	1.4579	1.2479		1.4237	1.2723	1.3708		1.44	1.5539	1.4505		3.74	1.3822	1.3407	1.396		1.3683	1.4375	1.3431		1.374	1.4562	1.4155		1.4164	1.4009	1.3626
3.75	1.3032	1.4676	1.2397		1.4269	1.2438	1.3659		1.4489	1.5564	1.4489		3.75	1.3854	1.3276	1.409		1.3691	1.4449	1.3341		1.3708	1.4546	1.4294		1.4115	1.3968	1.374
3.76	1.304	1.4725	1.2397		1.4326	1.2414	1.3561		1.453	1.5507	1.453		3.76	1.3903	1.3276	1.4009		1.3667	1.44	1.3488		1.3529	1.4554	1.4367		1.4107	1.3879	1.3805
3.77	1.3073	1.4652	1.2584		1.4278	1.2291	1.3569		1.4473	1.5564	1.4619		3.77	1.3838	1.3309	1.3919		1.3537	1.4571	1.3643		1.3561	1.4611	1.4514		1.4033	1.374	1.3789
3.78	1.3016	1.4554	1.2707		1.4229	1.2495	1.3651		1.4196	1.571	1.4603		3.78	1.3871	1.3236	1.3724		1.3529	1.4497	1.3716		1.3578	1.4611	1.44		1.4204	1.361	1.3765
3.79	1.3016	1.4587	1.2698		1.4172	1.2479	1.3748		1.4172	1.567	1.4636		3.79	1.3757	1.3219	1.3773		1.3578	1.4571	1.3626		1.3797	1.4693	1.431		1.4172	1.3529	1.3797
3.8	1.3114	1.4742	1.2658		1.4155	1.2593	1.3659		1.4237	1.5702	1.4709		3.8	1.3789	1.3284	1.3797		1.3773	1.4449	1.3691		1.3887	1.4676	1.4074		1.4335	1.3635	1.3928
3.81	1.3138	1.4742	1.2601		1.4172	1.2584	1.3789		1.4432	1.571	1.475		3.81	1.37	1.3521	1.3903		1.3748	1.4408	1.3675		1.3936	1.4587	1.4017		1.4375	1.374	1.3944
3.82	1.3162	1.4676	1.2519		1.4042	1.2715	1.3838		1.4579	1.5849	1.4872		3.82	1.3765	1.3578	1.3928		1.3708	1.4335	1.374		1.3952	1.4449	1.4123		1.453	1.3789	1.4001
3.83	1.304	1.4579	1.2511		1.4017	1.2772	1.3846		1.4505	1.584	1.4872		3.83	1.3838	1.3545	1.4009		1.3569	1.4245	1.3553		1.3919	1.4432	1.4253		1.4359	1.3757	1.4058
3.84	1.2967	1.466	1.2584		1.3936	1.2625	1.3748		1.4457	1.5832	1.4872		3.84	1.3862	1.3529	1.3846		1.3708	1.4221	1.3521		1.3838	1.4603	1.4278		1.4383	1.3854	1.405
3.85	1.2943	1.4717	1.2682		1.4131	1.2519	1.3594		1.4335	1.5726	1.4693		3.85	1.3797	1.3464	1.3814		1.3691	1.4261	1.3431		1.3887	1.4554	1.4172		1.4245	1.3895	1.3952
3.86	1.3032	1.479	1.2641		1.4335	1.2454	1.3561		1.4318	1.5637	1.453		3.86	1.3594	1.3374	1.3797		1.3757	1.4237	1.3529		1.4058	1.4587	1.418		1.4449	1.3887	1.3797
3.87	1.3187	1.4701	1.269		1.4497	1.247	1.3488		1.4229	1.5604	1.4489		3.87	1.3594	1.3244	1.3911		1.3724	1.4392	1.3529		1.4164	1.4489	1.4253		1.4335	1.3879	1.3651
3.88	1.3195	1.4603	1.2731		1.4595	1.2389	1.3537		1.4318	1.5645	1.4465		3.88	1.3667	1.3244	1.3879		1.3691	1.4278	1.3504		1.4025	1.4693	1.4416		1.4359	1.3928	1.3553
3.89	1.3252	1.4685	1.2861		1.4514	1.2389	1.3602		1.4514	1.5816	1.4497		3.89	1.374	1.3301	1.3903		1.3618	1.444	1.3496		1.3871	1.4644	1.4351		1.4155	1.3993	1.3472
3.9	1.3284	1.4839	1.2837		1.4359	1.2544	1.374		1.4742	1.5946	1.4424		3.9	1.3651	1.3293	1.4009		1.3667	1.4383	1.3626		1.3781	1.4619	1.4326		1.405	1.3976	1.3472
3.91	1.3276	1.4847	1.2747		1.418	1.2739	1.3708		1.466	1.6028	1.4514		3.91	1.3382	1.3341	1.3993		1.3879	1.4473	1.3797		1.383	1.4587	1.4302		1.4025	1.4001	1.3504
3.92	1.3203	1.4652	1.2707		1.4196	1.2739	1.383		1.4351	1.5922	1.4579		3.92	1.3366	1.3358	1.4058		1.396	1.4416	1.383		1.3757	1.4676	1.4359		1.4147	1.3895	1.3578
3.93	1.3073	1.444	1.2739		1.4212	1.2666	1.3814		1.4237	1.5824	1.4701		3.93	1.3521	1.3398	1.4033		1.3862	1.4375	1.3822		1.3789	1.4628	1.4383		1.4172	1.3903	1.3724
3.94	1.3065	1.444	1.3		1.4164	1.2495	1.3854		1.4286	1.5775	1.4685		3.94	1.383	1.3407	1.4082		1.3781	1.4408	1.37		1.3814	1.4554	1.4351		1.4261	1.3871	1.3952
3.95	1.2959	1.4676	1.2967		1.4123	1.2544	1.3838		1.444	1.5678	1.4701		3.95	1.4017	1.3374	1.3968		1.3838	1.4497	1.3757		1.3911	1.453	1.4261		1.4188	1.4001	1.4107
3.96	1.2959	1.479	1.2918		1.4172	1.2544	1.3911		1.4457	1.567	1.4595		3.96	1.4017	1.3496	1.3919		1.3903	1.4538	1.3683		1.3936	1.4619	1.4245		1.4261	1.405	1.3985
3.97	1.3048	1.4856	1.2845		1.4261	1.2552	1.4042		1.4449	1.5653	1.4554		3.97	1.4131	1.3504	1.3919		1.3944	1.4587	1.374		1.4058	1.4562	1.4131		1.4147	1.4115	1.3895
3.98	1.3162	1.4847	1.2845		1.4318	1.2438	1.3993		1.4351	1.5645	1.453		3.98	1.4196	1.3561	1.3822		1.3895	1.4522	1.3683		1.3928	1.4579	1.4131		1.4212	1.4204	1.3887
3.99	1.3097	1.4815	1.2772		1.4326	1.247	1.3968		1.4261	1.5523	1.4685		3.99	1.4212	1.3496	1.3757		1.3797	1.4562	1.3797		1.3797	1.4619	1.4188		1.4286	1.4164	1.3854
4	1.2943	1.4994	1.2454		1.4286	1.2446	1.3928		1.4155	1.5523	1.4693		4	1.396	1.3537	1.3838		1.3586	1.4636	1.3805		1.3659	1.4587	1.4204		1.4465	1.4098	1.3862
4.01	1.2837	1.5075	1.2348		1.4139	1.2625	1.3895		1.4204	1.5564	1.4742		4.01	1.374	1.3586	1.3952		1.3561	1.4644	1.3805		1.37	1.4408	1.4237		1.4424	1.4042	1.3724
4.02	1.2975	1.5238	1.2405		1.405	1.2617	1.3822		1.4326	1.571	1.475		4.02	1.3789	1.3602	1.3903		1.3716	1.4603	1.3635		1.3862	1.4383	1.4139		1.4269	1.4074	1.3716
4.03	1.3	1.5181	1.256		1.4033	1.2674	1.3838		1.4562	1.5604	1.4758		4.03	1.3838	1.3651	1.3871		1.3846	1.4514	1.361		1.3936	1.453	1.4229		1.409	1.4196	1.3529
4.04	1.3097	1.4961	1.2682		1.4082	1.2536	1.3797		1.4636	1.5653	1.4685		4.04	1.383	1.361	1.3911		1.383	1.4587	1.3635		1.4058	1.4676	1.418		1.4155	1.4164	1.3635
4.05	1.3065	1.4652	1.2755		1.4286	1.2609	1.3805		1.466	1.5637	1.4774		4.05	1.3757	1.3635	1.4123		1.3667	1.4717	1.3732		1.4123	1.4709	1.4253		1.4375	1.4074	1.3814
4.06	1.3097	1.4514	1.2853		1.4359	1.2674	1.3822		1.4457	1.5783	1.4807		4.06	1.3773	1.3586	1.4212		1.37	1.4595	1.3838		1.4025	1.4619	1.4229		1.4465	1.396	1.4009
4.07	1.3146	1.4522	1.2959		1.4375	1.2658	1.3838		1.4392	1.5686	1.4904		4.07	1.3797	1.3553	1.4278		1.3602	1.4424	1.3838		1.3903	1.466	1.4367		1.4383	1.383	1.4066
4.08	1.3146	1.4799	1.3008		1.4416	1.2495	1.3724		1.4375	1.5759	1.4896		4.08	1.374	1.3643	1.4302		1.3691	1.4221	1.3976		1.3879	1.4644	1.4465		1.4221	1.3871	1.4082
4.09	1.3219	1.4896	1.2934		1.4505	1.2487	1.361		1.4449	1.5718	1.4888		4.09	1.3838	1.3781	1.405		1.3659	1.431	1.3911		1.3993	1.4628	1.4489		1.418	1.3903	1.3985
4.1	1.3162	1.4986	1.2877		1.444	1.2519	1.3635		1.4595	1.5849	1.4815		4.1	1.3968	1.3822	1.3911		1.3797	1.4538	1.3895		1.4001	1.4465	1.4432		1.4172	1.3952	1.396
4.11	1.3211	1.5035	1.2821		1.4253	1.2666	1.3683		1.4595	1.5783	1.4636		4.11	1.4139	1.37	1.3773		1.3675	1.4571	1.3773		1.4042	1.4359	1.4245		1.4212	1.3928	1.3846
4.12	1.3179	1.5051	1.2821		1.4074	1.269	1.3748		1.4628	1.5808	1.4571		4.12	1.4188	1.3537	1.3968		1.3537	1.4497	1.3659		1.4098	1.4628	1.418		1.4367	1.3797	1.3911
4.13	1.3171	1.5035	1.2764		1.4123	1.2845	1.3757		1.4473	1.5767	1.4603		4.13	1.4212	1.3529	1.4042		1.361	1.4538	1.3773		1.4245	1.4815	1.4139		1.4449	1.396	1.3789
4.14	1.3179	1.5043	1.2739		1.4139	1.2861	1.3789		1.4497	1.5775	1.4628		4.14	1.4172	1.361	1.4164		1.3618	1.4505	1.3822		1.4172	1.4888	1.4269		1.4383	1.4009	1.3789
4.15	1.3154	1.51	1.278		1.4139	1.2861	1.3789		1.4522	1.5857	1.4709		4.15	1.4212	1.3602	1.4204		1.3846	1.444	1.3887		1.4033	1.4693	1.4326		1.418	1.4269	1.3675
4.16	1.3146	1.5108	1.2829		1.4278	1.2821	1.37		1.4554	1.5889	1.4676		4.16	1.4253	1.3618	1.4221		1.3748	1.4286	1.3781		1.4001	1.4652	1.4383		1.4204	1.4115	1.3724
4.17	1.3154	1.5043	1.2821		1.4278	1.2812	1.3618		1.4538	1.5775	1.4709		4.17	1.4245	1.361	1.4188		1.3928	1.4465	1.3773		1.4033	1.4758	1.4424		1.4294	1.4098	1.3789
4.18	1.3203	1.4888	1.2877		1.4424	1.2666	1.3504		1.4497	1.5743	1.4742		4.18	1.4212	1.3732	1.4115		1.3911	1.4538	1.3789		1.4172	1.4774	1.4432		1.4343	1.4082	1.3976
4.19	1.3219	1.4986	1.2877		1.44	1.2584	1.3464		1.4595	1.5906	1.4782		4.19	1.4082	1.3716	1.4139		1.3952	1.4611	1.3773		1.4172	1.4701	1.44		1.4188	1.4131	1.3919
4.2	1.3187	1.5035	1.2934		1.4481	1.2593	1.3553		1.4619	1.5987	1.4839		4.2	1.4155	1.3683	1.4123		1.3846	1.4375	1.3748		1.4098	1.4668	1.4367		1.418	1.4115	1.3797
4.21	1.3122	1.5181	1.291		1.4522	1.2658	1.3708		1.4668	1.5946	1.4782		4.21	1.418	1.3561	1.4042		1.3895	1.4286	1.3814		1.3887	1.4701	1.4481		1.4221	1.4033	1.3773
4.22	1.3073	1.514	1.2869		1.4505	1.2682	1.3789		1.4725	1.5726	1.4839		4.22	1.4204	1.361	1.4131		1.3854	1.4212	1.3936		1.3822	1.4717	1.4424		1.4335	1.4001	1.3919
4.23	1.2983	1.5149	1.2755		1.453	1.2511	1.3854		1.4603	1.5751	1.466		4.23	1.4074	1.3602	1.4042		1.4033	1.4278	1.3985		1.3846	1.4619	1.4351		1.4343	1.4058	1.4066
4.24	1.2967	1.5051	1.2723		1.4449	1.2568	1.3822		1.4449	1.5783	1.475		4.24	1.3895	1.3586	1.4196		1.3944	1.444	1.3862		1.3871	1.4554	1.4188		1.4286	1.3928	1.4009
4.25	1.3089	1.5108	1.2796		1.4408	1.2503	1.3773		1.4416	1.5979	1.4685		4.25	1.383	1.3602	1.4042		1.3976	1.4595	1.3732		1.4033	1.4628	1.4278		1.4123	1.396	1.4033
4.26	1.3073	1.5108	1.2869		1.4457	1.2698	1.3773		1.4595	1.5995	1.4896		4.26	1.3895	1.3545	1.4302		1.3879	1.4847	1.3675		1.4058	1.475	1.4302		1.4188	1.4025	1.3985
4.27	1.3114	1.5246	1.2926		1.4473	1.2804	1.3797		1.475	1.6044	1.4782		4.27	1.3936	1.3529	1.4326		1.3887	1.4872	1.3838		1.4204	1.488	1.4335		1.4351	1.4196	1.4066
4.28	1.3016	1.5197	1.2829		1.4522	1.2796	1.3846		1.4709	1.5751	1.4888		4.28	1.4058	1.348	1.4286		1.409	1.4693	1.3757		1.4098	1.4864	1.4383		1.4546	1.4326	1.405
4.29	1.3097	1.5026	1.2707		1.4497	1.2625	1.3805		1.4554	1.5629	1.4961		4.29	1.4074	1.3569	1.4074		1.4115	1.4465	1.3887		1.4147	1.479	1.4424		1.4611	1.4335	1.4107
4.3	1.3219	1.4921	1.2755		1.4481	1.2527	1.3805		1.4619	1.5523	1.501		4.3	1.4164	1.3635	1.3919		1.4155	1.4326	1.3838		1.4115	1.4733	1.431		1.4522	1.4237	1.4009
4.31	1.3179	1.488	1.2845		1.4505	1.2609	1.3944		1.4505	1.5678	1.4912		4.31	1.405	1.3724	1.4033		1.3976	1.4392	1.405		1.4147	1.4676	1.4367		1.4505	1.4098	1.3928
4.32	1.3203	1.4953	1.2975		1.4473	1.2723	1.4025		1.4562	1.5767	1.4733		4.32	1.4147	1.3683	1.4204		1.4017	1.453	1.4001		1.4098	1.4693	1.4416		1.444	1.3976	1.3887
4.33	1.2934	1.501	1.2877		1.4449	1.2772	1.4066		1.4505	1.5726	1.4782		4.33	1.409	1.3675	1.4196		1.3968	1.4619	1.3911		1.4058	1.4693	1.4571		1.4408	1.3993	1.405
4.34	1.2951	1.5035	1.2926		1.4489	1.2747	1.3968		1.4685	1.5775	1.4904		4.34	1.4188	1.3561	1.409		1.3928	1.4562	1.3854		1.4196	1.4815	1.4392		1.431	1.405	1.4212
4.35	1.2894	1.4994	1.2991		1.4546	1.2764	1.4017		1.4742	1.5792	1.5051		4.35	1.405	1.3578	1.3773		1.3846	1.4514	1.3797		1.4196	1.4847	1.4269		1.431	1.3968	1.4269
4.36	1.2934	1.4929	1.2918		1.4603	1.2845	1.409		1.4725	1.5906	1.5051		4.36	1.4123	1.3586	1.3822		1.3936	1.4465	1.3928		1.4294	1.4864	1.4204		1.4383	1.4074	1.4123
4.37	1.3024	1.4961	1.2861		1.4522	1.291	1.4115		1.4652	1.5857	1.4864		4.37	1.4123	1.3545	1.4025		1.4025	1.4457	1.383		1.4237	1.4799	1.4245		1.4546	1.4172	1.4009
4.38	1.2991	1.4953	1.2845		1.444	1.2869	1.4001		1.4611	1.5971	1.4856		4.38	1.4139	1.3488	1.418		1.3993	1.4367	1.3879		1.4212	1.4733	1.4302		1.4538	1.4318	1.4009
4.39	1.3089	1.4953	1.2951		1.4465	1.2755	1.3724		1.4693	1.602	1.4945		4.39	1.4131	1.3561	1.4196		1.3911	1.4375	1.3781		1.418	1.4668	1.4392		1.4481	1.4172	1.4017
4.4	1.3048	1.5002	1.2967		1.4514	1.2764	1.3659		1.4733	1.6093	1.514		4.4	1.4025	1.3659	1.405		1.3936	1.4457	1.3952		1.4139	1.4611	1.4489		1.453	1.3985	1.4001
4.41	1.2983	1.5043	1.2902		1.4571	1.2861	1.3586		1.479	1.5979	1.4969		4.41	1.3838	1.3659	1.409		1.4033	1.4562	1.4017		1.4221	1.4668	1.4595		1.4514	1.3976	1.3985
4.42	1.2943	1.5092	1.2886		1.4449	1.2902	1.3822		1.4644	1.5873	1.4807		4.42	1.3667	1.3578	1.3976		1.4042	1.4685	1.4017		1.4261	1.4733	1.4619		1.4465	1.3944	1.3993
4.43	1.2943	1.5035	1.2845		1.4351	1.2772	1.3928		1.4652	1.5897	1.475		4.43	1.3757	1.3553	1.396		1.3936	1.475	1.396		1.4359	1.4872	1.4571		1.4318	1.3903	1.4042
4.44	1.3179	1.5149	1.2886		1.4359	1.265	1.4066		1.4709	1.6052	1.4921		4.44	1.4042	1.3748	1.396		1.3838	1.4587	1.4017		1.4514	1.4986	1.4481		1.4286	1.3944	1.3993
4.45	1.3203	1.5075	1.2983		1.4554	1.2666	1.4042		1.4799	1.6166	1.5051		4.45	1.4147	1.374	1.4066		1.3765	1.4432	1.4066		1.4473	1.5075	1.4505		1.4318	1.4074	1.3928
4.46	1.3236	1.5002	1.2804		1.4603	1.2698	1.3976		1.479	1.6158	1.5043		4.46	1.4131	1.3732	1.4269		1.3846	1.44	1.4082		1.431	1.5035	1.4571		1.431	1.4123	1.3846
4.47	1.313	1.4807	1.2739		1.4457	1.2796	1.3919		1.466	1.619	1.5035		4.47	1.4001	1.3578	1.4237		1.4025	1.4497	1.3968		1.405	1.4986	1.4538		1.4237	1.405	1.3911
4.48	1.3146	1.4847	1.2674		1.4326	1.2755	1.3919		1.4628	1.6166	1.5002		4.48	1.4001	1.3578	1.4302		1.4131	1.4416	1.4066		1.3928	1.5026	1.44		1.4278	1.4009	1.4025
4.49	1.3146	1.4953	1.2967		1.4367	1.2731	1.4009		1.4685	1.6247	1.4839		4.49	1.4009	1.3529	1.4155		1.4074	1.4343	1.418		1.4017	1.5108	1.4424		1.4359	1.4164	1.4033
4.5	1.3073	1.514	1.3105		1.4571	1.2682	1.4058		1.4758	1.6174	1.4668		4.5	1.4139	1.3553	1.4261		1.3968	1.4383	1.4196		1.4082	1.5059	1.4432		1.4522	1.4221	1.4058
4.51	1.3138	1.5116	1.3089		1.4546	1.278	1.4107		1.4782	1.6085	1.4652		4.51	1.4253	1.3504	1.4212		1.4001	1.4571	1.4155		1.418	1.4733	1.4383		1.4359	1.4286	1.4001
4.52	1.3057	1.5083	1.3065		1.4408	1.2943	1.4033		1.4725	1.5954	1.4782		4.52	1.4392	1.3504	1.4237		1.3993	1.4595	1.4074		1.4098	1.4611	1.4318		1.4147	1.4359	1.4123
4.53	1.3073	1.5116	1.313		1.4351	1.2926	1.3952		1.475	1.5954	1.4872		4.53	1.4286	1.3447	1.4123		1.4017	1.4652	1.4066		1.4042	1.4717	1.4432		1.3952	1.4383	1.4107
4.54	1.3105	1.5311	1.3065		1.4392	1.2845	1.3871		1.4742	1.5971	1.4839		4.54	1.431	1.3398	1.4229		1.4058	1.4701	1.4058		1.405	1.5149	1.4693		1.4098	1.4286	1.4147
4.55	1.3252	1.5344	1.2983		1.4611	1.2853	1.3879		1.4758	1.6077	1.475		4.55	1.4196	1.3341	1.4131		1.4058	1.4839	1.3944		1.4107	1.5222	1.4717		1.4253	1.4074	1.3919
4.56	1.3374	1.5303	1.2812		1.4611	1.2975	1.3887		1.466	1.6166	1.4856		4.56	1.4408	1.3301	1.4147		1.3862	1.4945	1.4123		1.4123	1.5124	1.4693		1.4392	1.4115	1.3797
4.57	1.3301	1.5197	1.2877		1.4717	1.3008	1.3936		1.466	1.6304	1.5051		4.57	1.4408	1.3586	1.4009		1.3895	1.4912	1.4107		1.4131	1.4961	1.4546		1.4489	1.4204	1.3887
4.58	1.3211	1.5222	1.2747		1.4685	1.2869	1.4001		1.4619	1.6337	1.5214		4.58	1.444	1.361	1.3993		1.3993	1.5002	1.4131		1.4164	1.4929	1.4489		1.4587	1.4221	1.4082
4.59	1.3154	1.5271	1.2894		1.475	1.2788	1.4082		1.4668	1.6288	1.5173		4.59	1.4318	1.3675	1.3976		1.4229	1.4896	1.3871		1.4375	1.4921	1.4465		1.4742	1.4229	1.4123
4.6	1.3081	1.5368	1.2837		1.479	1.2796	1.4131		1.4725	1.6174	1.5035		4.6	1.418	1.3496	1.3936		1.4058	1.4912	1.3862		1.4489	1.475	1.4489		1.4668	1.4359	1.4025
4.61	1.3089	1.536	1.3114		1.4782	1.2845	1.4074		1.4782	1.6011	1.5026		4.61	1.4229	1.3569	1.4098		1.3976	1.475	1.396		1.4375	1.4701	1.44		1.4579	1.431	1.3968
4.62	1.3146	1.5303	1.3097		1.4717	1.2861	1.4107		1.4839	1.5938	1.5092		4.62	1.4286	1.3626	1.418		1.3895	1.4701	1.4107		1.4212	1.4717	1.4571		1.4497	1.418	1.3895
4.63	1.313	1.5165	1.3236		1.4676	1.2951	1.3976		1.4774	1.6044	1.5092		4.63	1.4416	1.3797	1.4237		1.4001	1.4636	1.4147		1.409	1.4888	1.4628		1.4595	1.3968	1.3903
4.64	1.3081	1.51	1.3114		1.466	1.3146	1.396		1.4685	1.6215	1.5132		4.64	1.4383	1.3871	1.4123		1.4058	1.4644	1.4001		1.4082	1.5035	1.4766		1.4774	1.4074	1.3968
4.65	1.3016	1.5173	1.326		1.4628	1.3146	1.3879		1.4709	1.6313	1.5173		4.65	1.4432	1.3944	1.4074		1.405	1.4725	1.3814		1.4082	1.5043	1.4619		1.475	1.4074	1.405
4.66	1.3081	1.5287	1.3309		1.4693	1.313	1.396		1.4709	1.6288	1.5132		4.66	1.4424	1.3911	1.4131		1.3976	1.4831	1.3732		1.4164	1.4937	1.4554		1.4709	1.4042	1.4155
4.67	1.3073	1.5344	1.3431		1.4693	1.2975	1.3993		1.4799	1.615	1.5092		4.67	1.4302	1.3928	1.4229		1.4025	1.4847	1.3683		1.4416	1.4839	1.4571		1.4644	1.3944	1.409
4.68	1.3105	1.5287	1.335		1.4856	1.3097	1.3952		1.4896	1.6068	1.5002		4.68	1.4164	1.3928	1.444		1.4058	1.4799	1.37		1.4619	1.479	1.4611		1.4668	1.3887	1.4139
4.69	1.3065	1.5165	1.3293		1.4774	1.3073	1.4025		1.4961	1.5914	1.5035		4.69	1.4123	1.3903	1.444		1.4172	1.4807	1.3708		1.4676	1.4823	1.4799		1.4668	1.4033	1.4042
4.7	1.3146	1.5149	1.3138		1.488	1.3162	1.4188		1.4994	1.5914	1.4986		4.7	1.431	1.383	1.4351		1.4098	1.4839	1.3936		1.466	1.4839	1.4799		1.4668	1.4155	1.405
4.71	1.3219	1.5124	1.2967		1.475	1.291	1.4343		1.4945	1.606	1.4961		4.71	1.4351	1.3724	1.4123		1.4066	1.4839	1.396		1.4432	1.4912	1.4758		1.4709	1.4221	1.4058
4.72	1.3309	1.5263	1.2926		1.4693	1.2837	1.4278		1.4961	1.615	1.5075		4.72	1.4465	1.3626	1.4204		1.4001	1.4912	1.3936		1.44	1.4912	1.466		1.4733	1.4107	1.4042
4.73	1.3309	1.5287	1.3024		1.4652	1.2837	1.4074		1.4969	1.6133	1.514		4.73	1.4424	1.3724	1.4343		1.3985	1.4831	1.3765		1.4196	1.4807	1.466		1.4782	1.4123	1.4164
4.74	1.3333	1.5352	1.3089		1.4733	1.3032	1.4066		1.4896	1.593	1.5238		4.74	1.4416	1.3822	1.4432		1.4025	1.479	1.3708		1.4375	1.479	1.475		1.4799	1.4147	1.4221
4.75	1.3301	1.5295	1.3154		1.4831	1.3203	1.4042		1.4912	1.5979	1.5206		4.75	1.4318	1.4033	1.4335		1.4107	1.4579	1.3683		1.444	1.4774	1.4815		1.4774	1.4375	1.4221
4.76	1.3309	1.5368	1.3081		1.4847	1.3236	1.4123		1.4994	1.5971	1.5263		4.76	1.4318	1.4025	1.4172		1.4131	1.4603	1.3789		1.4652	1.4896	1.4864		1.4668	1.4432	1.409
4.77	1.3154	1.5466	1.3089		1.4782	1.3276	1.4017		1.4986	1.5954	1.523		4.77	1.4196	1.3985	1.4155		1.409	1.4611	1.3952		1.4554	1.5067	1.4782		1.4546	1.453	1.4082
4.78	1.3276	1.549	1.3114		1.4676	1.3187	1.3928		1.51	1.5881	1.5165		4.78	1.4098	1.3862	1.431		1.405	1.4774	1.4058		1.453	1.5149	1.4628		1.4611	1.4359	1.4172
4.79	1.3398	1.5409	1.3211		1.4676	1.3211	1.4042		1.5206	1.6003	1.5026		4.79	1.4074	1.374	1.4473		1.4164	1.479	1.4033		1.4505	1.5124	1.4628		1.4628	1.431	1.4294
4.8	1.3407	1.5295	1.3293		1.4733	1.3097	1.4155		1.5189	1.6011	1.4864		4.8	1.4221	1.3691	1.4489		1.4278	1.4872	1.3919		1.4546	1.4953	1.4701		1.4636	1.431	1.4237
4.81	1.3358	1.5458	1.3236		1.4807	1.2959	1.4294		1.5173	1.6093	1.4807		4.81	1.4286	1.3643	1.4383		1.4188	1.4823	1.3887		1.4416	1.4937	1.4831		1.4562	1.4424	1.4098
4.82	1.3333	1.5613	1.3228		1.475	1.2788	1.4172		1.5043	1.6117	1.4799		4.82	1.4359	1.3716	1.4343		1.4009	1.4864	1.3822		1.4286	1.4945	1.475		1.4676	1.4367	1.3968
4.83	1.3301	1.5759	1.3162		1.4676	1.278	1.4115		1.501	1.6207	1.4896		4.83	1.4481	1.3691	1.4449		1.4033	1.4986	1.3773		1.4326	1.4969	1.4611		1.479	1.4286	1.3993
4.84	1.3236	1.5564	1.3228		1.4709	1.2861	1.4098		1.5067	1.6231	1.4856		4.84	1.4579	1.3708	1.4571		1.4172	1.5018	1.3814		1.4351	1.501	1.4473		1.4685	1.4042	1.4131
4.85	1.3171	1.5474	1.3317		1.475	1.2959	1.418		1.4986	1.619	1.488		4.85	1.4538	1.3683	1.4619		1.418	1.5026	1.3838		1.4326	1.5051	1.4522		1.4538	1.4025	1.4269
4.86	1.3276	1.5368	1.3293		1.4774	1.2943	1.4253		1.5165	1.6247	1.4847		4.86	1.4457	1.3716	1.4587		1.405	1.4961	1.3911		1.4269	1.4986	1.4685		1.4497	1.4009	1.4375
4.87	1.3333	1.5482	1.3203		1.4807	1.3032	1.4302		1.51	1.6166	1.5051		4.87	1.4294	1.3814	1.4497		1.4017	1.4872	1.4074		1.4343	1.4961	1.4733		1.466	1.4221	1.4383
4.88	1.3374	1.5482	1.3105		1.4782	1.3089	1.4269		1.5124	1.6142	1.5149		4.88	1.4253	1.3797	1.4489		1.4033	1.4815	1.4131		1.4416	1.5035	1.475		1.4668	1.4237	1.4318
4.89	1.3431	1.5482	1.3268		1.4807	1.3219	1.4204		1.5108	1.6077	1.5132		4.89	1.4229	1.3879	1.4505		1.4042	1.4766	1.4269		1.4465	1.51	1.4742		1.4595	1.4261	1.4261
4.9	1.3382	1.5393	1.348		1.4839	1.3146	1.4058		1.5067	1.6158	1.5092		4.9	1.4237	1.3797	1.4489		1.3903	1.4807	1.4058		1.4457	1.5157	1.4685		1.4587	1.431	1.4204
4.91	1.3317	1.5344	1.3578		1.4912	1.3162	1.3968		1.514	1.6125	1.5124		4.91	1.4237	1.3862	1.4416		1.3903	1.4782	1.4082		1.4497	1.5092	1.4644		1.4571	1.4416	1.4188
4.92	1.3179	1.5279	1.3545		1.5067	1.3097	1.396		1.5018	1.6036	1.5214		4.92	1.4172	1.3805	1.4343		1.3985	1.4807	1.3976		1.4514	1.4986	1.4554		1.4603	1.4571	1.4245
4.93	1.3081	1.5173	1.3521		1.5059	1.3252	1.4115		1.4961	1.6036	1.5246		4.93	1.4245	1.3822	1.4294		1.4107	1.4904	1.3928		1.4538	1.4978	1.4701		1.4505	1.4546	1.4457
4.94	1.3048	1.5271	1.3545		1.5026	1.3146	1.4278		1.4945	1.6117	1.5149		4.94	1.4237	1.3846	1.4253		1.4164	1.4994	1.3895		1.4546	1.5018	1.4685		1.4603	1.4587	1.4619
4.95	1.3081	1.536	1.3455		1.4904	1.3195	1.4302		1.4978	1.615	1.5157		4.95	1.4278	1.3854	1.4294		1.4196	1.5002	1.3887		1.4489	1.5108	1.4693		1.4611	1.4571	1.4579
4.96	1.3219	1.5531	1.326		1.4953	1.3105	1.4318		1.5059	1.6345	1.5059		4.96	1.4204	1.3895	1.4326		1.4237	1.4937	1.3879		1.4481	1.5083	1.4619		1.4636	1.4636	1.4392
4.97	1.3228	1.5474	1.3138		1.488	1.3179	1.4261		1.5035	1.6467	1.5116		4.97	1.4237	1.383	1.4424		1.4318	1.4888	1.3854		1.4514	1.5059	1.4587		1.4628	1.4522	1.4261
4.98	1.3268	1.5458	1.3236		1.4929	1.313	1.4155		1.5092	1.6606	1.5026		4.98	1.4326	1.3919	1.4432		1.4245	1.4782	1.3781		1.4595	1.5108	1.4562		1.4668	1.4343	1.4278
4.99	1.3228	1.5352	1.335		1.4815	1.313	1.3968		1.5067	1.6467	1.5035		4.99	1.4473	1.3862	1.4538		1.4221	1.4823	1.3765		1.4636	1.5173	1.4473		1.4823	1.4115	1.4253
5	1.3171	1.5319	1.3439		1.4904	1.3089	1.3936		1.5075	1.6394	1.5043		5	1.4457	1.3887	1.4514		1.431	1.4847	1.3773		1.4587	1.5067	1.4522		1.5018	1.4172	1.431
5.01	1.3114	1.5263	1.3293		1.4872	1.3333	1.4098		1.5222	1.641	1.5165		5.01	1.4343	1.3879	1.4562		1.4302	1.4994	1.3871		1.4473	1.5092	1.4644		1.5149	1.4294	1.4245
5.02	1.3114	1.5263	1.3236		1.4912	1.3358	1.4131		1.5189	1.6345	1.5254		5.02	1.4335	1.3952	1.4587		1.4253	1.5002	1.3976		1.4505	1.5026	1.4904		1.5157	1.4392	1.4294
5.03	1.3179	1.5417	1.3195		1.4953	1.3284	1.4042		1.5173	1.6272	1.5189		5.03	1.4351	1.3952	1.4668		1.4009	1.4994	1.3968		1.453	1.51	1.501		1.5018	1.431	1.4392
5.04	1.313	1.5596	1.3366		1.4945	1.3089	1.4017		1.5018	1.6321	1.5002		5.04	1.4351	1.3895	1.4571		1.3928	1.4856	1.3976		1.4693	1.5051	1.5043		1.4896	1.4204	1.4481
5.05	1.3122	1.5694	1.3407		1.4864	1.3024	1.4188		1.5002	1.6475	1.5026		5.05	1.4261	1.3797	1.44		1.4001	1.4774	1.3985		1.4685	1.5075	1.4961		1.479	1.4326	1.4449
5.06	1.3211	1.5507	1.3398		1.4823	1.3122	1.4278		1.4929	1.6589	1.5116		5.06	1.4318	1.3765	1.4237		1.4131	1.4782	1.3968		1.4823	1.5067	1.4864		1.4652	1.4497	1.4294
5.07	1.326	1.5401	1.3398		1.4782	1.3162	1.4278		1.4945	1.6646	1.5393		5.07	1.4335	1.3773	1.4131		1.4335	1.4839	1.3968		1.4815	1.514	1.466		1.4579	1.4562	1.4204
5.08	1.3374	1.5417	1.3537		1.4961	1.3122	1.4212		1.5067	1.6508	1.5181		5.08	1.4424	1.3765	1.4269		1.4367	1.488	1.396		1.4733	1.5149	1.4685		1.444	1.4375	1.4212
5.09	1.3268	1.5613	1.3472		1.4978	1.3097	1.4343		1.5149	1.641	1.5043		5.09	1.444	1.3765	1.4343		1.4449	1.4815	1.4042		1.4595	1.5165	1.4839		1.4465	1.4269	1.4082
5.1	1.3398	1.5718	1.3374		1.5083	1.3024	1.4359		1.5092	1.6125	1.4978		5.1	1.4514	1.374	1.4416		1.4424	1.4807	1.4025		1.4587	1.5018	1.4896		1.4538	1.4375	1.4025
5.11	1.3317	1.5726	1.3228		1.4929	1.3057	1.4261		1.4994	1.6044	1.5165		5.11	1.4538	1.3846	1.4359		1.4383	1.4701	1.3985		1.4807	1.4896	1.4807		1.4766	1.4457	1.4115
5.12	1.3333	1.5653	1.3236		1.4888	1.3105	1.4212		1.5051	1.6052	1.5254		5.12	1.4449	1.4033	1.44		1.4318	1.4823	1.4017		1.4831	1.4953	1.4733		1.4904	1.4416	1.4204
5.13	1.3252	1.5474	1.3284		1.4856	1.3016	1.4221		1.5083	1.6117	1.5246		5.13	1.4408	1.4172	1.4481		1.4294	1.4896	1.4139		1.4831	1.51	1.4758		1.4921	1.4392	1.4318
5.14	1.3171	1.5572	1.3146		1.4921	1.3032	1.4286		1.5108	1.6304	1.5214		5.14	1.4416	1.4245	1.4497		1.431	1.5026	1.4278		1.4733	1.5173	1.479		1.488	1.4465	1.4286
5.15	1.3203	1.5515	1.3203		1.4921	1.2983	1.4269		1.5043	1.6288	1.5279		5.15	1.4449	1.4139	1.4538		1.44	1.4978	1.4351		1.4774	1.5116	1.4799		1.4856	1.4611	1.4359
5.16	1.3236	1.5564	1.3114		1.4896	1.3162	1.4204		1.5059	1.6264	1.514		5.16	1.453	1.4033	1.4603		1.4449	1.4847	1.4367		1.4774	1.514	1.4864		1.4636	1.4652	1.4269
5.17	1.3358	1.5417	1.3284		1.4823	1.326	1.4245		1.5051	1.6158	1.5092		5.17	1.4562	1.3919	1.4644		1.4465	1.4831	1.4408		1.4628	1.5368	1.4912		1.453	1.475	1.4326
5.18	1.3236	1.5466	1.3228		1.4823	1.3073	1.4245		1.5132	1.6215	1.4978		5.18	1.4676	1.4033	1.4619		1.431	1.4831	1.4326		1.4587	1.5458	1.4986		1.453	1.4652	1.4269
5.19	1.3138	1.5409	1.3341		1.4904	1.3048	1.4212		1.5051	1.6313	1.5132		5.19	1.4571	1.4033	1.4595		1.4139	1.501	1.4221		1.4514	1.5539	1.4929		1.4823	1.4562	1.4261
5.2	1.3114	1.5507	1.3284		1.4929	1.3008	1.418		1.5035	1.628	1.5189		5.2	1.4652	1.4074	1.4652		1.4001	1.4994	1.4139		1.4514	1.5409	1.4831		1.5035	1.4481	1.4212
5.21	1.3179	1.5401	1.3382		1.4945	1.3146	1.4212		1.4953	1.6435	1.5279		5.21	1.4636	1.3976	1.4766		1.3936	1.5002	1.4058		1.4505	1.5385	1.4717		1.5083	1.4538	1.418
5.22	1.3309	1.5531	1.3374		1.4896	1.3105	1.4375		1.5173	1.6573	1.514		5.22	1.4619	1.4058	1.4733		1.4066	1.4896	1.4082		1.4514	1.5238	1.4774		1.5035	1.4554	1.4229
5.23	1.3472	1.5368	1.3423		1.4953	1.3122	1.4473		1.5197	1.6736	1.5181		5.23	1.4481	1.4042	1.4579		1.4269	1.4904	1.4042		1.4628	1.5303	1.4912		1.5018	1.4554	1.4204
5.24	1.361	1.5409	1.3374		1.4945	1.3309	1.4302		1.5328	1.6557	1.5067		5.24	1.4473	1.405	1.4375		1.4367	1.4994	1.4253		1.4636	1.5287	1.5067		1.4929	1.4489	1.4188
5.25	1.361	1.5376	1.3317		1.5002	1.3325	1.4107		1.5279	1.65	1.5132		5.25	1.4579	1.4196	1.4432		1.4221	1.5059	1.4253		1.466	1.5287	1.5051		1.4839	1.4392	1.4212
5.26	1.3423	1.5539	1.3398		1.5092	1.3284	1.4033		1.5385	1.6321	1.5222		5.26	1.4611	1.4237	1.453		1.4098	1.5026	1.4318		1.4514	1.5181	1.4904		1.4701	1.4449	1.4278
5.27	1.3382	1.5604	1.3455		1.5189	1.3114	1.418		1.5287	1.6329	1.5336		5.27	1.4709	1.4261	1.4562		1.4001	1.4799	1.4196		1.4514	1.5222	1.4847		1.4774	1.4619	1.4351
5.28	1.3358	1.5661	1.3488		1.514	1.2991	1.4302		1.514	1.6247	1.5482		5.28	1.4717	1.3936	1.4473		1.4115	1.4823	1.4351		1.453	1.5206	1.4888		1.4937	1.4725	1.4343
5.29	1.3358	1.567	1.3512		1.5083	1.2951	1.4375		1.4929	1.6304	1.5295		5.29	1.4709	1.4033	1.4424		1.4107	1.4847	1.4473		1.4636	1.523	1.5043		1.5043	1.4636	1.431
5.3	1.3187	1.5694	1.3537		1.5149	1.3138	1.4269		1.4896	1.6239	1.5303		5.3	1.4587	1.3985	1.4481		1.4155	1.4937	1.4432		1.4685	1.5116	1.4945		1.4953	1.4538	1.4481
5.31	1.313	1.5621	1.3569		1.5173	1.3496	1.4375		1.4969	1.6247	1.5303		5.31	1.4554	1.3976	1.4571		1.4098	1.4725	1.4432		1.4636	1.5157	1.4807		1.479	1.4587	1.4587
5.32	1.3187	1.5694	1.3537		1.5222	1.3618	1.4424		1.501	1.6296	1.5393		5.32	1.4457	1.3936	1.4571		1.4172	1.4717	1.4261		1.4652	1.5067	1.4701		1.4652	1.4538	1.4465
5.33	1.3472	1.5686	1.3496		1.5083	1.3594	1.4628		1.4994	1.6484	1.5368		5.33	1.4278	1.3985	1.453		1.4147	1.4807	1.4302		1.4603	1.514	1.4766		1.4742	1.4481	1.4392
5.34	1.3586	1.5816	1.3374		1.4994	1.3455	1.4595		1.4937	1.6557	1.5165		5.34	1.4335	1.4017	1.4465		1.4196	1.4921	1.4123		1.453	1.5108	1.4986		1.4782	1.4424	1.431
5.35	1.3521	1.5816	1.3293		1.4864	1.3447	1.4571		1.5083	1.6752	1.5263		5.35	1.4375	1.4001	1.4424		1.405	1.4912	1.4261		1.4522	1.5206	1.5026		1.4823	1.4432	1.4286
5.36	1.3423	1.5857	1.3236		1.4799	1.3423	1.4505		1.5051	1.6752	1.5328		5.36	1.466	1.3976	1.4383		1.4164	1.4921	1.4229		1.4562	1.5295	1.4969		1.4831	1.4392	1.4294
5.37	1.3317	1.5865	1.3341		1.4945	1.3382	1.4457		1.51	1.6695	1.5499		5.37	1.4693	1.3968	1.4383		1.4294	1.501	1.418		1.4693	1.5433	1.4937		1.4856	1.4408	1.4335
5.38	1.3341	1.5832	1.3366		1.5124	1.3366	1.4408		1.5132	1.6427	1.5458		5.38	1.4652	1.4009	1.4481		1.4473	1.5018	1.4058		1.4807	1.5319	1.4945		1.4986	1.4644	1.4392
5.39	1.3431	1.5857	1.3439		1.5222	1.3284	1.4343		1.5263	1.6272	1.5295		5.39	1.4619	1.4017	1.4644		1.4465	1.5083	1.4172		1.4766	1.5287	1.4921		1.4856	1.4839	1.4302
5.4	1.3504	1.584	1.3504		1.5149	1.3203	1.4326		1.5238	1.6264	1.5197		5.4	1.4457	1.409	1.466		1.4294	1.5092	1.4278		1.4758	1.5246	1.4888		1.4856	1.4856	1.418
5.41	1.3529	1.5596	1.3504		1.51	1.3228	1.4457		1.5263	1.65	1.523		5.41	1.4562	1.3952	1.4619		1.4286	1.5181	1.4286		1.4611	1.5328	1.5018		1.4758	1.4733	1.4188
5.42	1.3382	1.5531	1.3464		1.51	1.326	1.4538		1.5132	1.6777	1.5328		5.42	1.4522	1.3871	1.4628		1.4383	1.5173	1.4229		1.4546	1.5263	1.5124		1.4864	1.4668	1.4098
5.43	1.335	1.5556	1.3358		1.5051	1.3203	1.4652		1.5108	1.6866	1.5254		5.43	1.4595	1.3911	1.4709		1.4489	1.514	1.4261		1.453	1.5295	1.514		1.4847	1.466	1.4058
5.44	1.3382	1.58	1.3325		1.4856	1.3114	1.4611		1.4937	1.6736	1.5238		5.44	1.4628	1.396	1.479		1.4473	1.5092	1.4237		1.4619	1.5303	1.5043		1.4921	1.4717	1.4098
5.45	1.348	1.5865	1.3464		1.4961	1.3089	1.4587		1.5018	1.6524	1.5376		5.45	1.4562	1.4115	1.4742		1.4383	1.4994	1.4269		1.4831	1.5336	1.5075		1.4953	1.4815	1.4294
5.46	1.3472	1.58	1.3553		1.5083	1.3276	1.444		1.5271	1.6484	1.5499		5.46	1.4562	1.4212	1.4668		1.4481	1.4953	1.4164		1.4847	1.5173	1.5075		1.5075	1.4896	1.4554
5.47	1.3464	1.5726	1.3594		1.5279	1.3317	1.4432		1.5458	1.6467	1.5425		5.47	1.4497	1.4221	1.4701		1.4465	1.4961	1.4212		1.4856	1.5165	1.5035		1.5116	1.4831	1.4644
5.48	1.3293	1.5653	1.3561		1.5149	1.3374	1.4375		1.5515	1.6492	1.5319		5.48	1.4457	1.4221	1.4652		1.44	1.5026	1.4245		1.4799	1.51	1.5043		1.5035	1.4685	1.4628
5.49	1.3374	1.558	1.3594		1.5173	1.3268	1.4432		1.5263	1.6581	1.5279		5.49	1.4424	1.4229	1.4676		1.4326	1.5083	1.4432		1.4864	1.5214	1.5035		1.4953	1.4628	1.4603
5.5	1.3431	1.5645	1.3626		1.5197	1.3195	1.4416		1.5197	1.6663	1.5393		5.5	1.4457	1.4302	1.4489		1.4489	1.5108	1.4351		1.4766	1.5165	1.5189		1.479	1.4619	1.4571
5.51	1.3431	1.58	1.3569		1.5287	1.3138	1.444		1.5181	1.6744	1.549		5.51	1.4587	1.4237	1.4554		1.4481	1.514	1.4204		1.4815	1.5206	1.5246		1.4888	1.4628	1.4611
5.52	1.3309	1.6068	1.3521		1.523	1.3219	1.4424		1.5238	1.6671	1.5596		5.52	1.4522	1.418	1.4562		1.4335	1.523	1.3944		1.466	1.5246	1.5254		1.4912	1.4611	1.4603
5.53	1.3211	1.6101	1.3578		1.5238	1.3268	1.4351		1.5254	1.6524	1.5515		5.53	1.4481	1.409	1.4668		1.4188	1.5401	1.4033		1.4685	1.5352	1.514		1.4937	1.4628	1.4562
5.54	1.3431	1.6093	1.3643		1.5344	1.3358	1.4367		1.5173	1.6459	1.5409		5.54	1.4416	1.4033	1.4701		1.4318	1.5401	1.4253		1.4595	1.545	1.5059		1.4847	1.466	1.4514
5.55	1.3431	1.5873	1.3643		1.5352	1.3366	1.4497		1.5181	1.6484	1.5433		5.55	1.4554	1.4009	1.4815		1.4457	1.5279	1.4538		1.4782	1.5401	1.501		1.4733	1.4644	1.4449
5.56	1.3325	1.5906	1.361		1.5222	1.3594	1.4571		1.5124	1.654	1.536		5.56	1.4571	1.3944	1.4969		1.4392	1.5051	1.4562		1.4986	1.5295	1.4986		1.4717	1.4619	1.4489
5.57	1.3138	1.571	1.3618		1.4978	1.3675	1.4628		1.5246	1.6549	1.5433		5.57	1.4676	1.3797	1.4904		1.4302	1.5083	1.4351		1.5043	1.5189	1.5035		1.475	1.4514	1.4416
5.58	1.3219	1.5889	1.3626		1.5002	1.3643	1.4571		1.5328	1.6573	1.5417		5.58	1.4782	1.3724	1.4693		1.4302	1.514	1.4335		1.5116	1.5222	1.51		1.4896	1.4416	1.4383
5.59	1.3398	1.5816	1.3569		1.5173	1.348	1.4595		1.5336	1.6671	1.5539		5.59	1.4823	1.3789	1.4416		1.4383	1.5083	1.4335		1.4961	1.5401	1.5173		1.4978	1.4245	1.4286
5.6	1.3439	1.6003	1.3529		1.536	1.3333	1.4579		1.5303	1.6606	1.5458		5.6	1.488	1.3944	1.4408		1.4351	1.4969	1.4505		1.4937	1.5442	1.5165		1.4904	1.4294	1.4302
5.61	1.3439	1.5922	1.3618		1.5303	1.335	1.4579		1.5108	1.6573	1.5393		5.61	1.4856	1.3928	1.4481		1.4416	1.4937	1.4481		1.4742	1.5482	1.5246		1.488	1.4505	1.44
5.62	1.348	1.6028	1.3626		1.536	1.3439	1.4562		1.51	1.6451	1.5328		5.62	1.4847	1.3936	1.4514		1.4375	1.5173	1.4424		1.4782	1.5442	1.5173		1.4799	1.4733	1.4457
5.63	1.3683	1.5914	1.3683		1.5352	1.3407	1.4481		1.5059	1.6597	1.5393		5.63	1.4701	1.396	1.4465		1.4408	1.5214	1.4449		1.4766	1.5409	1.5026		1.4912	1.4912	1.4522
5.64	1.3651	1.5922	1.3635		1.5352	1.3317	1.44		1.5295	1.6614	1.5319		5.64	1.4644	1.4107	1.4497		1.4237	1.5165	1.4457		1.4847	1.536	1.4945		1.4847	1.4766	1.4408
5.65	1.3545	1.5702	1.3545		1.5132	1.3276	1.4408		1.5401	1.6614	1.5336		5.65	1.4595	1.4155	1.4668		1.4335	1.5124	1.4505		1.4725	1.5344	1.4994		1.4839	1.4709	1.4432
5.66	1.3439	1.5816	1.3553		1.4978	1.3341	1.4571		1.5515	1.6549	1.5368		5.66	1.466	1.4147	1.4807		1.4424	1.5132	1.4579		1.4717	1.5499	1.5051		1.4709	1.4562	1.4497
5.67	1.3488	1.5816	1.3464		1.4961	1.3455	1.4619		1.5531	1.6687	1.5556		5.67	1.4652	1.4139	1.466		1.4579	1.5214	1.4538		1.4823	1.5507	1.4921		1.4701	1.479	1.4628
5.68	1.3537	1.5971	1.3553		1.5157	1.3398	1.4571		1.5572	1.6801	1.5678		5.68	1.479	1.4115	1.4481		1.4619	1.5173	1.4489		1.4986	1.5474	1.4856		1.479	1.4872	1.4676
5.69	1.3415	1.5873	1.3529		1.5263	1.3358	1.4457		1.5474	1.6744	1.5694		5.69	1.4799	1.4172	1.4383		1.4725	1.5222	1.4383		1.4969	1.5271	1.488		1.4896	1.4864	1.4505
5.7	1.3341	1.5759	1.3675		1.5458	1.3358	1.4546		1.5409	1.6565	1.571		5.7	1.4945	1.4107	1.4416		1.4693	1.5254	1.4335		1.4864	1.5083	1.501		1.5002	1.4701	1.4546
5.71	1.3439	1.5718	1.3732		1.545	1.3382	1.4652		1.5401	1.6532	1.5547		5.71	1.4953	1.4164	1.4473		1.4538	1.5263	1.4465		1.4831	1.4978	1.5083		1.5043	1.4636	1.453
5.72	1.3504	1.5783	1.3757		1.5556	1.3512	1.4758		1.5661	1.6565	1.5523		5.72	1.4961	1.4155	1.4546		1.4457	1.5352	1.4505		1.4937	1.5059	1.5173		1.5059	1.4668	1.4676
5.73	1.3545	1.5938	1.37		1.5442	1.3447	1.4717		1.5661	1.6549	1.5352		5.73	1.4807	1.4164	1.4611		1.4505	1.5319	1.4554		1.4847	1.5189	1.5092		1.4937	1.4693	1.4546
5.74	1.3431	1.5938	1.3667		1.5328	1.3447	1.4742		1.5604	1.6484	1.5515		5.74	1.4709	1.4229	1.4709		1.4457	1.523	1.4473		1.4782	1.5279	1.5124		1.4986	1.4815	1.4408
5.75	1.3464	1.584	1.361		1.5295	1.3472	1.4644		1.5458	1.6337	1.5547		5.75	1.466	1.4245	1.4685		1.4367	1.5157	1.4318		1.4701	1.5271	1.5043		1.4986	1.4856	1.4294
5.76	1.3439	1.567	1.3529		1.5319	1.3578	1.4562		1.5458	1.6239	1.5686		5.76	1.4766	1.4261	1.4668		1.4335	1.5165	1.4367		1.4872	1.5287	1.514		1.5067	1.4888	1.431
5.77	1.3464	1.5596	1.3643		1.5328	1.3569	1.4343		1.5466	1.6207	1.5637		5.77	1.4831	1.4033	1.4611		1.4505	1.5295	1.4473		1.4945	1.5279	1.5149		1.5067	1.4799	1.4473
5.78	1.3366	1.5694	1.3805		1.5214	1.3472	1.4383		1.5433	1.6378	1.5694		5.78	1.488	1.4033	1.4717		1.4546	1.5254	1.453		1.4978	1.5271	1.5206		1.5197	1.4758	1.4595
5.79	1.335	1.5865	1.3879		1.51	1.3431	1.4579		1.5433	1.6484	1.5653		5.79	1.4904	1.4147	1.4799		1.4497	1.5401	1.4505		1.488	1.5352	1.5222		1.5295	1.4725	1.4571
5.8	1.3415	1.5979	1.396		1.51	1.3464	1.4709		1.5539	1.6654	1.5645		5.8	1.4839	1.4383	1.488		1.4416	1.5311	1.4392		1.4961	1.5368	1.5189		1.5279	1.4701	1.4546
5.81	1.3561	1.5963	1.3887		1.514	1.3504	1.4872		1.5596	1.6679	1.567		5.81	1.475	1.4367	1.4758		1.444	1.5328	1.4269		1.4961	1.5393	1.5238		1.5222	1.4733	1.453
5.82	1.3691	1.5971	1.3928		1.5254	1.361	1.4758		1.5661	1.6671	1.5735		5.82	1.4742	1.4343	1.4603		1.4497	1.5295	1.4302		1.501	1.5368	1.5311		1.5222	1.4807	1.4636
5.83	1.3643	1.5906	1.3822		1.5409	1.3602	1.4807		1.5507	1.65	1.5678		5.83	1.4742	1.4326	1.4571		1.4546	1.5303	1.4538		1.4912	1.536	1.5401		1.5295	1.4912	1.4685
5.84	1.3602	1.5889	1.3838		1.5515	1.3691	1.4717		1.5376	1.6516	1.5507		5.84	1.4815	1.4432	1.4571		1.4497	1.5295	1.4725		1.4912	1.5385	1.5352		1.5263	1.5051	1.4717
5.85	1.3683	1.5783	1.3919		1.5515	1.3594	1.4652		1.5336	1.6549	1.549		5.85	1.4636	1.4392	1.4676		1.4538	1.5206	1.4709		1.4921	1.5254	1.5206		1.5222	1.5002	1.4807
5.86	1.3651	1.5914	1.3911		1.5401	1.3594	1.4628		1.5336	1.663	1.5572		5.86	1.4701	1.431	1.4693		1.4579	1.5311	1.453		1.488	1.5311	1.5043		1.5181	1.4864	1.4709
5.87	1.3586	1.5897	1.3846		1.5271	1.3521	1.4685		1.5344	1.6663	1.5702		5.87	1.4774	1.4098	1.4872		1.4652	1.5442	1.4522		1.4921	1.5287	1.501		1.5254	1.4619	1.4701
5.88	1.339	1.5906	1.3879		1.5263	1.3561	1.475		1.5385	1.672	1.5718		5.88	1.4864	1.409	1.4986		1.4571	1.5393	1.44		1.4921	1.5393	1.5083		1.5319	1.4554	1.4571
5.89	1.339	1.5816	1.3773		1.5303	1.3553	1.4562		1.5433	1.6785	1.5629		5.89	1.4994	1.4131	1.5002		1.4497	1.5393	1.4302		1.4969	1.5401	1.514		1.5368	1.4685	1.4595
5.9	1.3472	1.5873	1.3797		1.5319	1.3537	1.431		1.5621	1.6679	1.558		5.9	1.5035	1.4302	1.4978		1.4538	1.5368	1.4318		1.4961	1.545	1.5189		1.5344	1.4807	1.4603
5.91	1.3472	1.5963	1.3651		1.5319	1.3496	1.4351		1.5613	1.663	1.5499		5.91	1.5132	1.4204	1.5018		1.4514	1.5385	1.4392		1.4978	1.5474	1.5279		1.5263	1.4921	1.4628
5.92	1.3415	1.593	1.3724		1.5376	1.3464	1.4595		1.5678	1.6622	1.5385		5.92	1.4994	1.4196	1.4961		1.4465	1.5442	1.4432		1.5026	1.549	1.5279		1.5206	1.4799	1.4676
5.93	1.3358	1.584	1.3781		1.536	1.339	1.4807		1.5572	1.676	1.536		5.93	1.4839	1.4082	1.4766		1.4449	1.5466	1.4416		1.5092	1.5547	1.5311		1.5165	1.4904	1.4611
5.94	1.3521	1.593	1.3805		1.5328	1.3472	1.4823		1.558	1.6793	1.5376		5.94	1.4709	1.4196	1.4587		1.4473	1.5661	1.4505		1.5026	1.5604	1.5157		1.5173	1.4986	1.4571
5.95	1.3561	1.6109	1.3781		1.5254	1.3594	1.4774		1.5564	1.6793	1.5596		5.95	1.4774	1.4155	1.4644		1.4546	1.5531	1.4652		1.4912	1.5539	1.5132		1.5083	1.4953	1.4652
5.96	1.361	1.6174	1.37		1.5263	1.3765	1.4782		1.5547	1.6703	1.5531		5.96	1.479	1.4139	1.4774		1.4473	1.5401	1.4758		1.4872	1.5433	1.4945		1.5075	1.4815	1.4676
5.97	1.3594	1.5995	1.3521		1.5303	1.3675	1.4904		1.5401	1.6744	1.5726		5.97	1.479	1.4147	1.501		1.4457	1.523	1.4709		1.4921	1.5336	1.4961		1.5116	1.4685	1.4758
5.98	1.3691	1.584	1.3586		1.545	1.3561	1.4953		1.5352	1.6809	1.5783		5.98	1.4864	1.4269	1.5108		1.4335	1.523	1.4644		1.5051	1.5425	1.5026		1.5303	1.4799	1.4823
5.99	1.37	1.5873	1.3602		1.5466	1.3464	1.5002		1.5385	1.6809	1.5963		5.99	1.488	1.4367	1.51		1.4449	1.5271	1.4644		1.4921	1.5474	1.514		1.5409	1.4758	1.488
6	1.3488	1.5865	1.3757		1.5482	1.3455	1.4807		1.5588	1.6654	1.5897		6	1.5026	1.4326	1.4896		1.4514	1.5385	1.4668		1.4807	1.5539	1.5083		1.5393	1.4733	1.4888
6.01	1.3455	1.5865	1.3757		1.5376	1.3586	1.475		1.5499	1.6614	1.5759		6.01	1.5002	1.4278	1.479		1.4668	1.5458	1.4595		1.4733	1.5401	1.5124		1.5385	1.4701	1.4644
6.02	1.3415	1.5857	1.3651		1.5417	1.3561	1.4644		1.5433	1.6695	1.558		6.02	1.4986	1.4318	1.4709		1.4571	1.5547	1.4522		1.4856	1.5336	1.5238		1.5254	1.4912	1.4457
6.03	1.3667	1.5873	1.3602		1.5499	1.3602	1.4774		1.5409	1.685	1.5482		6.03	1.4831	1.4253	1.4628		1.4505	1.5629	1.4473		1.4937	1.5238	1.5328		1.5295	1.4929	1.4457
6.04	1.361	1.5995	1.3602		1.5466	1.3545	1.4725		1.5678	1.6834	1.5531		6.04	1.4709	1.4221	1.4709		1.4335	1.5767	1.4587		1.4872	1.5295	1.5336		1.5246	1.4953	1.453
6.05	1.3626	1.6199	1.3732		1.5458	1.3521	1.475		1.5849	1.685	1.5629		6.05	1.4709	1.4172	1.4807		1.4278	1.567	1.4571		1.4856	1.5352	1.5368		1.5246	1.4815	1.466
6.06	1.3504	1.6378	1.3765		1.5531	1.3504	1.4668		1.5832	1.6793	1.5694		6.06	1.4742	1.4302	1.4969		1.4318	1.5531	1.4538		1.4912	1.5499	1.549		1.5116	1.4937	1.4611
6.07	1.3561	1.6272	1.3814		1.5556	1.3455	1.4807		1.5743	1.6777	1.5865		6.07	1.475	1.4294	1.4856		1.4489	1.5279	1.4457		1.51	1.5515	1.5482		1.5083	1.5083	1.4587
6.08	1.3569	1.6077	1.3854		1.5507	1.3586	1.4717		1.5743	1.6703	1.602		6.08	1.4864	1.4204	1.4945		1.4668	1.5263	1.4465		1.5173	1.5482	1.5295		1.5214	1.5116	1.4497
6.09	1.3553	1.5914	1.3862		1.5401	1.3561	1.4668		1.5726	1.6785	1.6133		6.09	1.4888	1.4131	1.4978		1.4619	1.5336	1.4628		1.5197	1.545	1.5116		1.5287	1.4969	1.4514
6.1	1.3504	1.6052	1.3724		1.5352	1.3602	1.4465		1.5645	1.6891	1.5873		6.1	1.4986	1.4155	1.5059		1.4628	1.5458	1.4611		1.5116	1.5531	1.5173		1.5319	1.4774	1.4546
6.11	1.3398	1.6133	1.3748		1.5442	1.3496	1.4693		1.5556	1.6988	1.5743		6.11	1.4929	1.4375	1.4945		1.4538	1.5604	1.453		1.5002	1.5678	1.5385		1.5368	1.479	1.4717
6.12	1.3496	1.6174	1.3765		1.5328	1.3464	1.466		1.5531	1.6891	1.5499		6.12	1.4807	1.4465	1.4815		1.4611	1.5556	1.4432		1.4969	1.5824	1.5499		1.558	1.4953	1.4888
6.13	1.348	1.6158	1.3944		1.545	1.3529	1.4872		1.5645	1.6752	1.5564		6.13	1.4676	1.4497	1.4774		1.4611	1.5556	1.4579		1.5051	1.5889	1.5458		1.5637	1.5026	1.4929
6.14	1.3545	1.6044	1.3919		1.5637	1.3561	1.4725		1.5686	1.6711	1.5368		6.14	1.4628	1.4204	1.4807		1.4636	1.5458	1.4676		1.523	1.5792	1.5393		1.5556	1.4872	1.4856
6.15	1.348	1.6109	1.3887		1.5678	1.3797	1.4831		1.567	1.6891	1.5409		6.15	1.4676	1.4237	1.4945		1.4628	1.5385	1.4636		1.5401	1.5718	1.5401		1.5393	1.4693	1.475
6.16	1.3512	1.6011	1.3805		1.5425	1.3814	1.475		1.5556	1.7078	1.5433		6.16	1.4856	1.4212	1.5026		1.4595	1.5376	1.4489		1.5393	1.5702	1.5409		1.5393	1.4758	1.4725
6.17	1.3545	1.6085	1.3724		1.5165	1.3838	1.4782		1.5588	1.7029	1.5621		6.17	1.4904	1.4408	1.4978		1.4554	1.5507	1.4481		1.5279	1.58	1.5368		1.5376	1.4945	1.4758
6.18	1.3578	1.602	1.374		1.5222	1.3643	1.4839		1.5792	1.7037	1.5645		6.18	1.4929	1.4278	1.4921		1.4619	1.5678	1.4676		1.523	1.5661	1.5222		1.5295	1.4904	1.4693
6.19	1.3553	1.6036	1.3708		1.5433	1.3594	1.4856		1.5751	1.698	1.5824		6.19	1.488	1.4335	1.4831		1.453	1.5686	1.4782		1.5075	1.5572	1.5092		1.5067	1.475	1.4701
6.2	1.3431	1.6109	1.3862		1.5425	1.3537	1.4782		1.5637	1.6907	1.5824		6.2	1.4929	1.4432	1.4774		1.4505	1.5629	1.4774		1.5026	1.5482	1.5124		1.5075	1.4725	1.4847
6.21	1.3431	1.6101	1.3862		1.5442	1.3643	1.475		1.5596	1.6736	1.5914		6.21	1.51	1.4595	1.4693		1.4424	1.5507	1.475		1.4945	1.5637	1.5385		1.5238	1.4831	1.4888
6.22	1.3521	1.6068	1.3887		1.545	1.3675	1.4799		1.5726	1.6728	1.5767		6.22	1.5002	1.4514	1.466		1.4554	1.5531	1.4815		1.5035	1.5686	1.5482		1.536	1.4888	1.4961
6.23	1.3651	1.6133	1.3846		1.5621	1.3683	1.4782		1.5726	1.6931	1.5678		6.23	1.4872	1.4571	1.4636		1.4603	1.5556	1.479		1.5059	1.5653	1.5401		1.5409	1.4864	1.4807
6.24	1.3651	1.6199	1.3838		1.5751	1.3643	1.4815		1.5637	1.7029	1.5645		6.24	1.4839	1.4514	1.4782		1.453	1.5507	1.4619		1.4978	1.5653	1.5222		1.5319	1.4912	1.4766
6.25	1.3765	1.6321	1.3708		1.5726	1.3488	1.4676		1.5613	1.7045	1.5645		6.25	1.4864	1.4636	1.4823		1.4554	1.5466	1.4522		1.4904	1.558	1.5279		1.5515	1.4945	1.4766
6.26	1.3846	1.6158	1.3618		1.5556	1.3618	1.4733		1.5743	1.6793	1.5629		6.26	1.5051	1.4554	1.4888		1.4554	1.536	1.4587		1.4831	1.5637	1.5189		1.5564	1.4937	1.4815
6.27	1.3862	1.6044	1.3716		1.5336	1.3667	1.4766		1.5718	1.6695	1.5523		6.27	1.5002	1.4497	1.4766		1.4628	1.5417	1.4766		1.4904	1.5376	1.5238		1.5645	1.4864	1.479
6.28	1.3716	1.6101	1.3928		1.5287	1.3895	1.4986		1.5718	1.6663	1.545		6.28	1.4921	1.4375	1.4709		1.4595	1.5222	1.488		1.5124	1.536	1.5319		1.5433	1.4921	1.4693
6.29	1.3691	1.602	1.4009		1.5376	1.3805	1.5002		1.5678	1.6842	1.5499		6.29	1.4774	1.4286	1.4742		1.4522	1.5376	1.4815		1.523	1.5311	1.5531		1.5425	1.488	1.4636
6.3	1.3765	1.6133	1.3985		1.5474	1.374	1.4986		1.5694	1.6939	1.5556		6.3	1.4733	1.4172	1.4815		1.4652	1.5352	1.4717		1.5263	1.5556	1.5515		1.5368	1.4904	1.466
6.31	1.374	1.6109	1.3911		1.5604	1.361	1.5035		1.5637	1.6939	1.5613		6.31	1.4774	1.4237	1.4807		1.4693	1.5564	1.4644		1.5222	1.5661	1.5344		1.5474	1.4766	1.4676
6.32	1.3602	1.6239	1.3919		1.5775	1.3643	1.5197		1.5604	1.6834	1.567		6.32	1.4742	1.4212	1.4668		1.4693	1.5466	1.475		1.5279	1.5661	1.514		1.5344	1.4847	1.4571
6.33	1.3472	1.6313	1.3993		1.5824	1.3724	1.5173		1.5556	1.6947	1.5621		6.33	1.4717	1.4237	1.4733		1.4668	1.5499	1.4856		1.5181	1.558	1.514		1.5433	1.4912	1.444
6.34	1.3415	1.6247	1.3976		1.5808	1.374	1.4953		1.5604	1.6923	1.5686		6.34	1.4839	1.4155	1.4864		1.4709	1.5482	1.4978		1.514	1.5556	1.5197		1.5458	1.5026	1.4416
6.35	1.3512	1.6272	1.3919		1.5678	1.37	1.4799		1.5629	1.7004	1.5865		6.35	1.501	1.4172	1.5108		1.4839	1.549	1.4986		1.5067	1.567	1.5303		1.5474	1.5083	1.4489
6.36	1.3431	1.6247	1.3879		1.5596	1.3594	1.4636		1.5678	1.6874	1.6003		6.36	1.5043	1.4212	1.5149		1.4685	1.5572	1.4815		1.5124	1.5816	1.5311		1.5376	1.5254	1.4611
6.37	1.3325	1.637	1.3936		1.549	1.3488	1.4628		1.5547	1.6866	1.5897		6.37	1.4978	1.4269	1.5116		1.4628	1.5686	1.4571		1.5059	1.5881	1.5271		1.5352	1.5271	1.4717
6.38	1.335	1.6304	1.396		1.5507	1.3504	1.466		1.5474	1.6891	1.5775		6.38	1.4896	1.4343	1.5051		1.4554	1.5694	1.4465		1.5059	1.5914	1.5409		1.5271	1.5279	1.4774
6.39	1.3464	1.6361	1.4009		1.5637	1.3586	1.4823		1.5385	1.6923	1.5637		6.39	1.4953	1.4424	1.5059		1.4693	1.567	1.453		1.514	1.5849	1.5385		1.5263	1.5116	1.4978
6.4	1.361	1.6247	1.4123		1.5702	1.3814	1.4807		1.5564	1.6988	1.5767		6.4	1.5083	1.4335	1.5075		1.466	1.5645	1.4709		1.523	1.5637	1.5417		1.5254	1.5124	1.4896
6.41	1.3569	1.6378	1.4164		1.5678	1.3732	1.4782		1.5653	1.7004	1.5824		6.41	1.5181	1.4237	1.5043		1.4644	1.5702	1.4668		1.5458	1.5515	1.5319		1.5319	1.5051	1.4774
6.42	1.3553	1.615	1.4131		1.5564	1.3602	1.4758		1.5824	1.7078	1.6028		6.42	1.5189	1.4164	1.501		1.4546	1.571	1.475		1.5417	1.5515	1.5254		1.5303	1.5067	1.453
6.43	1.3618	1.6288	1.4009		1.545	1.3529	1.4896		1.5816	1.7013	1.5938		6.43	1.5051	1.4269	1.5059		1.4571	1.5767	1.4685		1.5271	1.5792	1.5214		1.5287	1.5149	1.4611
6.44	1.3643	1.6304	1.4017		1.5385	1.3724	1.5018		1.5824	1.6817	1.58		6.44	1.4945	1.4269	1.4961		1.4709	1.5759	1.4799		1.4921	1.5808	1.523		1.5328	1.5206	1.4619
6.45	1.3708	1.6516	1.4042		1.5499	1.4082	1.4994		1.584	1.6606	1.58		6.45	1.4969	1.4245	1.4896		1.4953	1.5661	1.4693		1.4815	1.5694	1.5336		1.5368	1.5206	1.4742
6.46	1.3618	1.6345	1.4025		1.5661	1.4082	1.4945		1.5873	1.6622	1.584		6.46	1.501	1.4204	1.4807		1.5116	1.5564	1.4701		1.4937	1.5547	1.5433		1.5295	1.5067	1.4611
6.47	1.3667	1.6174	1.3887		1.567	1.4033	1.4831		1.5995	1.6858	1.5906		6.47	1.5051	1.431	1.5018		1.5092	1.5515	1.4603		1.5116	1.5482	1.558		1.5287	1.4986	1.4733
6.48	1.3732	1.6028	1.3765		1.5539	1.3797	1.4823		1.5865	1.6956	1.5914		6.48	1.4896	1.4465	1.5002		1.5026	1.5661	1.4668		1.5222	1.5564	1.567		1.5319	1.5026	1.4628
6.49	1.3985	1.5979	1.3822		1.5393	1.3781	1.4912		1.5832	1.6988	1.5857		6.49	1.4807	1.4514	1.5092		1.4856	1.5645	1.4709		1.5222	1.5629	1.5718		1.5336	1.5197	1.4725
6.5	1.3903	1.6142	1.3944		1.5466	1.3675	1.4945		1.5808	1.6939	1.58		6.5	1.4717	1.4571	1.5026		1.4782	1.5678	1.4725		1.5287	1.5808	1.567		1.5246	1.5271	1.466
6.51	1.3805	1.6166	1.4042		1.5376	1.3683	1.501		1.5897	1.6972	1.5572		6.51	1.4872	1.4603	1.5026		1.4652	1.5792	1.466		1.5287	1.5808	1.5653		1.5214	1.5189	1.4717
6.52	1.3569	1.6174	1.4058		1.5385	1.3667	1.4872		1.5889	1.7061	1.5621		6.52	1.5059	1.4522	1.5043		1.4611	1.5897	1.4742		1.514	1.5775	1.5442		1.5206	1.51	1.4717
6.53	1.3635	1.6158	1.4025		1.5303	1.3822	1.4758		1.5767	1.7143	1.5678		6.53	1.5271	1.4562	1.5083		1.453	1.5946	1.4807		1.5116	1.5653	1.5238		1.5271	1.5116	1.4839
6.54	1.3675	1.6345	1.405		1.5433	1.3862	1.4709		1.5824	1.7151	1.584		6.54	1.5222	1.4571	1.5124		1.4619	1.5743	1.4782		1.5157	1.558	1.514		1.5222	1.5026	1.4807
6.55	1.3651	1.6508	1.4033		1.5564	1.3903	1.479		1.5873	1.7159	1.5889		6.55	1.5157	1.4628	1.5083		1.4603	1.5678	1.4611		1.5328	1.5556	1.536		1.523	1.5043	1.4823
6.56	1.3691	1.6532	1.4009		1.5515	1.3879	1.4937		1.6028	1.7004	1.5849		6.56	1.5026	1.4562	1.5092		1.4717	1.5556	1.4546		1.5181	1.5694	1.5393		1.5263	1.5035	1.4799
6.57	1.3626	1.6418	1.3789		1.5393	1.3757	1.4912		1.5938	1.7004	1.5849		6.57	1.51	1.4554	1.5067		1.4668	1.5613	1.453		1.5287	1.5726	1.5376		1.5474	1.514	1.4872
6.58	1.3659	1.6402	1.3675		1.5376	1.3675	1.4847		1.5914	1.6947	1.58		6.58	1.4937	1.4611	1.5043		1.4733	1.5678	1.453		1.5271	1.5661	1.5328		1.5556	1.5092	1.4742
6.59	1.3569	1.6321	1.3765		1.5596	1.3512	1.4896		1.5824	1.6939	1.5897		6.59	1.4912	1.4538	1.4978		1.4774	1.5767	1.4652		1.545	1.5531	1.5352		1.5596	1.5067	1.4628
6.6	1.3618	1.6239	1.4058		1.5743	1.3496	1.51		1.5922	1.6793	1.5857		6.6	1.4839	1.4457	1.4994		1.4766	1.5621	1.4742		1.5271	1.5596	1.5474		1.5368	1.5124	1.4595
6.61	1.3724	1.6109	1.4253		1.571	1.3586	1.5197		1.5832	1.6801	1.571		6.61	1.4945	1.4335	1.5002		1.479	1.5556	1.4766		1.5254	1.5751	1.5385		1.5295	1.5173	1.4733
6.62	1.3757	1.615	1.4115		1.5661	1.3765	1.5124		1.5824	1.685	1.567		6.62	1.5035	1.4432	1.5043		1.4831	1.5466	1.4725		1.5067	1.5857	1.5409		1.5393	1.5206	1.4701
6.63	1.3838	1.6247	1.3952		1.5653	1.3944	1.4929		1.5694	1.7013	1.5751		6.63	1.5067	1.4343	1.51		1.4978	1.5604	1.4758		1.5181	1.5792	1.5271		1.5499	1.5132	1.4644
6.64	1.3822	1.6361	1.3846		1.5816	1.3985	1.4831		1.5792	1.7037	1.5897		6.64	1.5254	1.44	1.5132		1.4953	1.5499	1.4807		1.5173	1.5645	1.5165		1.5458	1.5067	1.4644
6.65	1.3846	1.6321	1.3903		1.5743	1.3919	1.4758		1.5661	1.7118	1.5938		6.65	1.5206	1.4375	1.5173		1.4929	1.5596	1.4961		1.5303	1.5417	1.5279		1.5393	1.5002	1.4823
6.66	1.3659	1.6329	1.3879		1.571	1.37	1.4774		1.5678	1.7078	1.5873		6.66	1.5271	1.4481	1.5108		1.4766	1.5523	1.4904		1.5173	1.5474	1.5417		1.5287	1.5059	1.4945
6.67	1.3561	1.628	1.3846		1.5629	1.3659	1.4839		1.5572	1.707	1.5954		6.67	1.5083	1.4473	1.5263		1.4888	1.5539	1.4969		1.523	1.5588	1.5637		1.5417	1.51	1.4945
6.68	1.3545	1.6321	1.3952		1.5637	1.3708	1.4986		1.5718	1.7127	1.5954		6.68	1.5067	1.4335	1.5263		1.4872	1.558	1.4799		1.5206	1.5832	1.5474		1.5376	1.5181	1.4896
6.69	1.3651	1.6337	1.4107		1.5629	1.3822	1.4994		1.58	1.7224	1.6085		6.69	1.4953	1.431	1.5263		1.4904	1.5686	1.4774		1.5189	1.5857	1.5287		1.5482	1.5279	1.4896
6.7	1.3732	1.6475	1.4098		1.5515	1.3854	1.5043		1.5897	1.7208	1.6166		6.7	1.5059	1.4449	1.5149		1.4782	1.5808	1.4709		1.514	1.5816	1.5108		1.5352	1.5336	1.4864
6.71	1.3797	1.6492	1.3952		1.5417	1.3903	1.5075		1.5808	1.7086	1.6174		6.71	1.5051	1.4717	1.4904		1.4685	1.5775	1.4766		1.5132	1.5678	1.5173		1.5425	1.5303	1.4904
6.72	1.3862	1.6304	1.3854		1.5336	1.4042	1.5287		1.58	1.7021	1.6028		6.72	1.5092	1.4685	1.4864		1.4799	1.5726	1.4929		1.5189	1.558	1.5425		1.5393	1.5246	1.5067
6.73	1.3976	1.6158	1.405		1.5433	1.4123	1.5246		1.5767	1.7102	1.584		6.73	1.5043	1.4571	1.4701		1.488	1.5588	1.5043		1.5206	1.5621	1.5507		1.5539	1.5075	1.514
6.74	1.4017	1.6247	1.4172		1.558	1.4107	1.5206		1.5816	1.7151	1.5824		6.74	1.5116	1.4367	1.4864		1.4994	1.5499	1.5035		1.5254	1.5743	1.5547		1.5401	1.5124	1.5181
6.75	1.4009	1.6484	1.4229		1.5726	1.4033	1.5181		1.5792	1.7265	1.5865		6.75	1.5075	1.4554	1.4986		1.5026	1.5547	1.4847		1.523	1.5832	1.5319		1.5433	1.514	1.4961
6.76	1.4017	1.654	1.4188		1.5775	1.3936	1.5271		1.5849	1.7061	1.5889		6.76	1.4986	1.4595	1.5222		1.5035	1.5718	1.4766		1.5246	1.5832	1.5433		1.536	1.5417	1.4896
6.77	1.3944	1.6459	1.4131		1.5808	1.3936	1.5132		1.5735	1.711	1.5849		6.77	1.4896	1.4644	1.5303		1.5051	1.5759	1.4685		1.5222	1.5751	1.5385		1.5344	1.5442	1.4856
6.78	1.3976	1.6402	1.3993		1.5865	1.3895	1.4904		1.5726	1.7053	1.5808		6.78	1.4921	1.4595	1.5319		1.4888	1.571	1.4733		1.5263	1.5767	1.5556		1.536	1.5376	1.4953
6.79	1.3968	1.6394	1.3919		1.5963	1.3805	1.4872		1.5816	1.7175	1.5767		6.79	1.5018	1.466	1.523		1.4815	1.5702	1.4717		1.5344	1.5726	1.545		1.5401	1.5222	1.4961
6.8	1.4098	1.6467	1.383		1.5987	1.3822	1.5043		1.5963	1.7135	1.58		6.8	1.4912	1.4676	1.523		1.4782	1.571	1.4766		1.5393	1.5767	1.5474		1.5564	1.5222	1.5035
6.81	1.405	1.6508	1.3928		1.5987	1.3944	1.5214		1.6085	1.7037	1.5661		6.81	1.4929	1.4628	1.5149		1.488	1.5881	1.4782		1.5466	1.567	1.549		1.5515	1.5222	1.4978
6.82	1.4058	1.6581	1.3952		1.584	1.409	1.514		1.6077	1.707	1.5613		6.82	1.4986	1.4579	1.5165		1.5002	1.58	1.4896		1.5417	1.567	1.5588		1.5604	1.5206	1.5108
6.83	1.3919	1.6516	1.4147		1.5686	1.4115	1.5051		1.6174	1.7102	1.5425		6.83	1.5124	1.4611	1.5083		1.4969	1.5767	1.4896		1.5433	1.5637	1.5621		1.558	1.5197	1.4978
6.84	1.3879	1.6467	1.4221		1.5694	1.4098	1.5083		1.606	1.7184	1.5523		6.84	1.5124	1.4742	1.5083		1.4921	1.5637	1.5035		1.5425	1.5816	1.5564		1.5686	1.5344	1.4888
6.85	1.3667	1.6443	1.4212		1.5718	1.4082	1.5132		1.6003	1.7053	1.5547		6.85	1.5108	1.4742	1.5035		1.4864	1.5694	1.4969		1.5515	1.5954	1.5319		1.5613	1.5376	1.4815
6.86	1.3635	1.6337	1.4058		1.5889	1.396	1.5197		1.6011	1.7061	1.5629		6.86	1.4994	1.4766	1.5092		1.4896	1.5832	1.5043		1.5539	1.6093	1.536		1.5645	1.5336	1.4872
6.87	1.3586	1.6272	1.4042		1.5832	1.3781	1.5124		1.6036	1.72	1.5661		6.87	1.4961	1.4709	1.5092		1.4864	1.5881	1.4969		1.5515	1.6125	1.5352		1.5547	1.5303	1.5059
6.88	1.3838	1.6199	1.4131		1.5792	1.3724	1.5165		1.5995	1.7354	1.5694		6.88	1.4929	1.4709	1.5083		1.4888	1.5938	1.4945		1.5482	1.5979	1.5531		1.549	1.5336	1.5157
6.89	1.3952	1.6215	1.4253		1.5792	1.3781	1.5108		1.5946	1.7322	1.5735		6.89	1.5083	1.4668	1.5108		1.5002	1.6003	1.4799		1.545	1.5938	1.5515		1.5409	1.5263	1.5132
6.9	1.3944	1.6313	1.4245		1.5922	1.3936	1.5181		1.6044	1.7102	1.5824		6.9	1.5206	1.4579	1.5075		1.5002	1.6003	1.4774		1.5409	1.5849	1.5678		1.5352	1.5165	1.4929
6.91	1.37	1.6427	1.4261		1.5914	1.3871	1.5197		1.6142	1.711	1.5889		6.91	1.5173	1.4546	1.4978		1.4986	1.5987	1.479		1.5368	1.5946	1.567		1.5352	1.5067	1.4733
6.92	1.37	1.6581	1.4196		1.5897	1.3789	1.5197		1.6044	1.711	1.5914		6.92	1.5173	1.444	1.4969		1.488	1.5857	1.4872		1.5417	1.5759	1.5613		1.5271	1.5075	1.4685
6.93	1.3871	1.6744	1.4107		1.5686	1.3773	1.5165		1.584	1.7224	1.5938		6.93	1.5173	1.4416	1.5075		1.4978	1.584	1.4847		1.5531	1.5629	1.5572		1.5442	1.4945	1.4758
6.94	1.4131	1.6939	1.3911		1.571	1.3911	1.5132		1.5922	1.7224	1.5906		6.94	1.5238	1.4261	1.5206		1.4994	1.5881	1.4823		1.5564	1.567	1.5775		1.5564	1.5018	1.4856
6.95	1.4058	1.6907	1.3936		1.571	1.4017	1.5173		1.5954	1.7371	1.5906		6.95	1.5189	1.4335	1.5197		1.5043	1.5922	1.4945		1.5531	1.5816	1.5865		1.5629	1.5067	1.4856
6.96	1.3976	1.6817	1.3936		1.584	1.4066	1.51		1.6117	1.7468	1.5873		6.96	1.5083	1.4465	1.5092		1.4937	1.5881	1.5092		1.5425	1.5938	1.5718		1.5499	1.514	1.4896
6.97	1.3789	1.6671	1.405		1.5824	1.4066	1.5018		1.5808	1.7493	1.5897		6.97	1.5067	1.4733	1.4969		1.4856	1.58	1.5132		1.5433	1.5914	1.5515		1.5458	1.5197	1.4986
6.98	1.3748	1.6671	1.4001		1.5808	1.4058	1.5051		1.5889	1.7338	1.5971		6.98	1.5124	1.4758	1.4864		1.4766	1.5678	1.4969		1.545	1.593	1.5433		1.5474	1.5295	1.5083
6.99	1.3846	1.6581	1.4058		1.5808	1.4033	1.5083		1.5963	1.7216	1.5938		6.99	1.5124	1.475	1.4937		1.4839	1.5694	1.4815		1.5433	1.5995	1.5499		1.5499	1.5271	1.5116
7	1.3993	1.6557	1.4001		1.5783	1.405	1.5254		1.615	1.7184	1.5881		7	1.5075	1.4676	1.51		1.488	1.5726	1.4831		1.5385	1.5914	1.5336		1.5417	1.5181	1.5108
7.01	1.4042	1.6589	1.409		1.58	1.4009	1.5263		1.6068	1.7257	1.5938		7.01	1.5083	1.453	1.5344		1.5035	1.58	1.4986		1.5271	1.584	1.5336		1.5474	1.5018	1.5051
7.02	1.405	1.672	1.4098		1.5857	1.3911	1.5303		1.5938	1.7281	1.593		7.02	1.5263	1.4473	1.5271		1.5018	1.5865	1.5132		1.5222	1.5621	1.5393		1.5556	1.5092	1.4929
7.03	1.3887	1.672	1.4082		1.5865	1.3846	1.5279		1.5938	1.7354	1.6077		7.03	1.5295	1.4579	1.5206		1.5116	1.58	1.5043		1.5108	1.5564	1.558		1.5735	1.5246	1.479
7.04	1.3887	1.6597	1.4139		1.5906	1.3903	1.5368		1.6011	1.7436	1.5938		7.04	1.5165	1.4676	1.5018		1.5108	1.5906	1.4937		1.5092	1.5523	1.5694		1.5767	1.5385	1.4823
7.05	1.3732	1.6524	1.418		1.584	1.3903	1.5336		1.6003	1.7363	1.5865		7.05	1.5067	1.4676	1.5124		1.5165	1.5881	1.4847		1.5279	1.5604	1.5694		1.5759	1.5417	1.4978
7.06	1.3797	1.6524	1.4253		1.5873	1.3805	1.523		1.5889	1.7354	1.5726		7.06	1.5173	1.4554	1.5067		1.514	1.5979	1.4921		1.5368	1.5816	1.5775		1.5702	1.5336	1.5116
7.07	1.3846	1.6581	1.4155		1.5889	1.3773	1.5035		1.584	1.7387	1.5783		7.07	1.5319	1.4562	1.5108		1.5092	1.5914	1.51		1.5515	1.5971	1.5735		1.5751	1.5442	1.5165
7.08	1.3919	1.6606	1.4131		1.5897	1.4009	1.501		1.5767	1.7566	1.5824		7.08	1.5287	1.4424	1.5051		1.4978	1.5816	1.5181		1.5425	1.6093	1.567		1.5759	1.5425	1.5173
7.09	1.4066	1.6549	1.4196		1.5906	1.4253	1.5059		1.5857	1.7468	1.5881		7.09	1.5197	1.4432	1.514		1.4807	1.5686	1.5189		1.5466	1.5938	1.558		1.5775	1.5442	1.5051
7.1	1.4009	1.6532	1.4375		1.5702	1.4326	1.514		1.5824	1.7411	1.5726		7.1	1.51	1.4424	1.5328		1.4652	1.5653	1.5083		1.5482	1.593	1.5499		1.5678	1.5336	1.5051
7.11	1.4033	1.6451	1.4497		1.5653	1.4107	1.5311		1.5808	1.7273	1.5906		7.11	1.5067	1.4562	1.5507		1.4668	1.5637	1.4945		1.5531	1.5914	1.5572		1.5523	1.5295	1.501
7.12	1.3879	1.6345	1.4514		1.5507	1.4017	1.5458		1.5686	1.7354	1.5987		7.12	1.5035	1.4473	1.5629		1.4847	1.58	1.4864		1.5482	1.6068	1.5678		1.5466	1.523	1.5043
7.13	1.4025	1.6394	1.44		1.5678	1.3968	1.5499		1.5783	1.7395	1.6101		7.13	1.5043	1.4383	1.5466		1.4961	1.5678	1.4799		1.5474	1.6085	1.5743		1.5466	1.5319	1.5026
7.14	1.396	1.6386	1.4294		1.5613	1.4066	1.5246		1.5897	1.7411	1.6117		7.14	1.5165	1.4367	1.5319		1.501	1.58	1.4725		1.5385	1.6068	1.567		1.5637	1.5417	1.5075
7.15	1.4042	1.6597	1.4164		1.571	1.4042	1.5181		1.6003	1.7428	1.6052		7.15	1.5165	1.4514	1.5295		1.5035	1.5767	1.4685		1.536	1.6036	1.5556		1.5499	1.5458	1.5116
7.16	1.3968	1.6622	1.4098		1.558	1.4147	1.5026		1.6003	1.7346	1.6207		7.16	1.5189	1.475	1.523		1.514	1.5873	1.4636		1.5385	1.593	1.5515		1.545	1.5409	1.4937
7.17	1.4042	1.6606	1.4082		1.5678	1.4188	1.5189		1.6125	1.7379	1.6133		7.17	1.5124	1.4742	1.5149		1.5181	1.5783	1.4774		1.5523	1.5938	1.5556		1.5433	1.5417	1.4921
7.18	1.4042	1.6475	1.4164		1.5686	1.4245	1.5157		1.6142	1.7411	1.6077		7.18	1.5132	1.4619	1.5018		1.5165	1.5759	1.4847		1.5686	1.5873	1.5629		1.5645	1.5303	1.5018
7.19	1.4123	1.6394	1.4115		1.5865	1.4123	1.5287		1.6003	1.7403	1.5897		7.19	1.5246	1.4489	1.514		1.5173	1.58	1.4937		1.5678	1.5938	1.5645		1.5645	1.5149	1.5222
7.2	1.4237	1.6435	1.4115		1.5946	1.4107	1.5189		1.5832	1.7387	1.5889		7.2	1.5303	1.4514	1.536		1.5116	1.5971	1.4904		1.5653	1.5881	1.5523		1.5629	1.5083	1.523
7.21	1.4286	1.654	1.4025		1.5881	1.4017	1.5075		1.5751	1.7322	1.6044		7.21	1.5222	1.4644	1.5401		1.5035	1.5938	1.4847		1.5531	1.5849	1.5531		1.5556	1.5157	1.5083
7.22	1.4237	1.672	1.4123		1.5726	1.4033	1.5059		1.5718	1.7322	1.6133		7.22	1.5124	1.4847	1.5442		1.4912	1.593	1.4766		1.5474	1.5906	1.5564		1.571	1.5271	1.5051
7.23	1.4164	1.6777	1.4147		1.5718	1.4058	1.5173		1.5694	1.7273	1.606		7.23	1.501	1.4912	1.5352		1.4856	1.5906	1.4847		1.5393	1.6036	1.5613		1.5759	1.5368	1.5002
7.24	1.4131	1.6646	1.4229		1.5954	1.4115	1.5311		1.5987	1.7151	1.6028		7.24	1.514	1.5018	1.5376		1.4774	1.5946	1.4912		1.549	1.5922	1.5596		1.5808	1.5393	1.5083
7.25	1.4098	1.6581	1.4221		1.6052	1.4107	1.5287		1.6207	1.7167	1.6052		7.25	1.5197	1.4961	1.523		1.475	1.6044	1.5018		1.558	1.5865	1.5686		1.58	1.5344	1.5287
7.26	1.4098	1.6589	1.4302		1.6011	1.4115	1.5263		1.6353	1.7273	1.606		7.26	1.5246	1.4904	1.5263		1.4839	1.5971	1.4937		1.5613	1.58	1.5857		1.5767	1.514	1.5352
7.27	1.4131	1.663	1.4261		1.5849	1.4139	1.5279		1.619	1.7346	1.5873		7.27	1.5206	1.466	1.5295		1.4986	1.5922	1.5002		1.5629	1.6085	1.5865		1.5588	1.5173	1.5425
7.28	1.4082	1.6573	1.4294		1.5922	1.4229	1.5287		1.6182	1.7241	1.5637		7.28	1.5214	1.4644	1.5311		1.5124	1.5767	1.5051		1.5531	1.6044	1.5865		1.5564	1.5246	1.5328
7.29	1.3968	1.6532	1.4343		1.58	1.4123	1.5336		1.5995	1.7175	1.5653		7.29	1.5303	1.4611	1.5157		1.5116	1.5767	1.5083		1.5547	1.6068	1.58		1.5588	1.549	1.5197
7.3	1.3985	1.6606	1.4351		1.5832	1.409	1.5376		1.584	1.7086	1.5702		7.3	1.523	1.466	1.5067		1.5067	1.5832	1.5026		1.5556	1.5897	1.5735		1.5735	1.5572	1.5157
7.31	1.3968	1.6671	1.4261		1.5816	1.4058	1.536		1.5808	1.7127	1.5881		7.31	1.51	1.4644	1.5083		1.5092	1.5865	1.4953		1.5564	1.6093	1.5653		1.5653	1.5613	1.5108
7.32	1.3968	1.6711	1.4172		1.5987	1.4074	1.5254		1.5938	1.7102	1.5849		7.32	1.5026	1.4644	1.5181		1.5092	1.5963	1.5026		1.5678	1.6101	1.5645		1.5702	1.5556	1.5197
7.33	1.3805	1.6711	1.4237		1.6077	1.4098	1.5165		1.602	1.7224	1.5914		7.33	1.4986	1.4668	1.5075		1.5059	1.5914	1.5157		1.5726	1.6223	1.5694		1.5653	1.5409	1.5189
7.34	1.3789	1.6752	1.4343		1.6028	1.3944	1.5271		1.5971	1.7346	1.5987		7.34	1.5092	1.4693	1.5067		1.5035	1.5987	1.5165		1.5767	1.6182	1.5629		1.567	1.5271	1.5149
7.35	1.3919	1.6842	1.4278		1.5979	1.396	1.5246		1.5889	1.7289	1.6077		7.35	1.5067	1.4766	1.5051		1.5043	1.5808	1.5075		1.5678	1.6142	1.5572		1.5678	1.5157	1.5157
7.36	1.4082	1.6777	1.4261		1.5946	1.3976	1.5181		1.5938	1.7314	1.6182		7.36	1.5254	1.4733	1.5059		1.514	1.5808	1.5035		1.5442	1.602	1.5539		1.5702	1.5092	1.5149
7.37	1.4017	1.6663	1.4253		1.5897	1.4074	1.5051		1.5987	1.7346	1.6068		7.37	1.5279	1.4717	1.5173		1.51	1.5694	1.5116		1.5409	1.593	1.5653		1.5751	1.5157	1.5263
7.38	1.3895	1.6435	1.4343		1.6068	1.4082	1.5116		1.6101	1.7509	1.602		7.38	1.5376	1.4668	1.5238		1.5149	1.5792	1.5181		1.5425	1.593	1.5726		1.5702	1.5328	1.5222
7.39	1.3838	1.6402	1.4253		1.6109	1.4074	1.5157		1.6125	1.7346	1.5865		7.39	1.5393	1.4701	1.5295		1.5018	1.5897	1.5206		1.5604	1.6101	1.5767		1.5783	1.549	1.5279
7.4	1.4009	1.6475	1.4229		1.6239	1.4139	1.5214		1.6174	1.7184	1.6011		7.4	1.5466	1.4603	1.5083		1.5116	1.602	1.514		1.5694	1.6077	1.5726		1.5743	1.5466	1.5173
7.41	1.4131	1.6654	1.4172		1.6133	1.4155	1.51		1.6239	1.7037	1.6133		7.41	1.5442	1.4579	1.4912		1.514	1.6028	1.5051		1.5759	1.6003	1.5604		1.5751	1.5385	1.523
7.42	1.3993	1.6793	1.4237		1.6093	1.4188	1.5043		1.6174	1.7037	1.6288		7.42	1.5482	1.4676	1.4856		1.5271	1.6003	1.4929		1.5726	1.5914	1.5531		1.5694	1.5173	1.514
7.43	1.3919	1.6882	1.4212		1.5979	1.4155	1.5026		1.6003	1.7078	1.6182		7.43	1.536	1.4619	1.5035		1.5157	1.602	1.4888		1.5621	1.5751	1.5425		1.5816	1.523	1.5189
7.44	1.3789	1.6842	1.4343		1.5995	1.4155	1.5124		1.5849	1.7135	1.602		7.44	1.5246	1.4725	1.5124		1.5157	1.606	1.4896		1.5458	1.5743	1.5393		1.5792	1.5352	1.523
7.45	1.3838	1.6817	1.4424		1.5995	1.4147	1.5132		1.5938	1.7208	1.6036		7.45	1.5108	1.4628	1.5197		1.5124	1.6133	1.4815		1.5393	1.5783	1.5336		1.5792	1.558	1.5344
7.46	1.3854	1.6711	1.4505		1.593	1.4278	1.5059		1.6028	1.7151	1.6101		7.46	1.5124	1.466	1.523		1.5051	1.6166	1.4774		1.5409	1.6068	1.5442		1.5775	1.5653	1.5311
7.47	1.3887	1.6614	1.4505		1.5954	1.4335	1.5149		1.5946	1.7265	1.6264		7.47	1.5132	1.4693	1.5279		1.4839	1.615	1.488		1.5499	1.6223	1.549		1.58	1.5499	1.5222
7.48	1.3976	1.6484	1.4343		1.5938	1.4375	1.5287		1.5906	1.7289	1.6329		7.48	1.5157	1.4701	1.5303		1.479	1.5971	1.5075		1.5482	1.6313	1.5735		1.5857	1.5499	1.5116
7.49	1.3976	1.6532	1.4269		1.6044	1.4245	1.536		1.5889	1.7208	1.6402		7.49	1.523	1.475	1.5279		1.5035	1.5873	1.5181		1.5499	1.6353	1.5792		1.5743	1.536	1.5132
7.5	1.4009	1.65	1.4164		1.5865	1.418	1.5336		1.6109	1.7159	1.6272		7.5	1.5303	1.4554	1.5254		1.523	1.5808	1.5018		1.545	1.6264	1.593		1.5645	1.5474	1.5197
7.51	1.3968	1.6484	1.4212		1.5889	1.4033	1.5214		1.6125	1.7298	1.6101		7.51	1.5319	1.453	1.5287		1.5401	1.5808	1.4921		1.5556	1.6093	1.5767		1.5613	1.5287	1.5197
7.52	1.4033	1.6386	1.4302		1.5857	1.405	1.5173		1.6247	1.7493	1.5963		7.52	1.5271	1.4611	1.5254		1.5173	1.5718	1.4904		1.5564	1.5963	1.5596		1.5621	1.5238	1.5092
7.53	1.3968	1.6516	1.4204		1.5914	1.4107	1.51		1.6231	1.7468	1.606		7.53	1.5263	1.4733	1.5352		1.5157	1.5751	1.4953		1.571	1.6003	1.5474		1.5718	1.5279	1.4961
7.54	1.3903	1.6663	1.4123		1.5995	1.4172	1.5124		1.6231	1.7411	1.6093		7.54	1.523	1.488	1.5393		1.5083	1.5906	1.4961		1.5743	1.6142	1.5531		1.5718	1.545	1.5043
7.55	1.3862	1.6736	1.4074		1.6077	1.4123	1.5279		1.6109	1.7249	1.6077		7.55	1.5189	1.4733	1.5433		1.5092	1.6093	1.4986		1.584	1.6182	1.5604		1.5816	1.5629	1.514
7.56	1.3911	1.672	1.4155		1.6133	1.4058	1.5295		1.6077	1.7151	1.602		7.56	1.5189	1.4725	1.5328		1.5157	1.6052	1.501		1.5783	1.6182	1.5588		1.5783	1.5564	1.5181
7.57	1.3968	1.6687	1.4416		1.5963	1.405	1.5417		1.6109	1.7118	1.6011		7.57	1.5279	1.466	1.5344		1.5254	1.6003	1.5083		1.5792	1.5995	1.5613		1.5751	1.558	1.5092
7.58	1.4033	1.6671	1.4367		1.5963	1.4147	1.5425		1.6207	1.7273	1.6101		7.58	1.5287	1.4912	1.5319		1.5279	1.6003	1.5059		1.5857	1.5735	1.5759		1.5637	1.5482	1.5018
7.59	1.4172	1.6679	1.4375		1.5873	1.4139	1.5482		1.6174	1.7363	1.6117		7.59	1.5385	1.5059	1.5328		1.5246	1.6133	1.5149		1.584	1.5653	1.5767		1.5613	1.5458	1.5108
7.6	1.4229	1.6614	1.4245		1.5889	1.4229	1.5572		1.6182	1.7346	1.6109		7.6	1.5336	1.5026	1.5385		1.5043	1.6215	1.5059		1.5808	1.5751	1.5849		1.5759	1.545	1.5083
7.61	1.4098	1.6622	1.4286		1.5857	1.4155	1.5539		1.6182	1.7354	1.6068		7.61	1.5401	1.4847	1.5336		1.5132	1.6166	1.501		1.5767	1.602	1.5865		1.5832	1.5547	1.51
7.62	1.4131	1.6524	1.4221		1.5946	1.4237	1.558		1.6345	1.742	1.6093		7.62	1.5271	1.4644	1.5319		1.5214	1.6125	1.4864		1.5775	1.606	1.6036		1.5849	1.549	1.514
7.63	1.4204	1.6524	1.4245		1.5906	1.4196	1.536		1.6288	1.7509	1.619		7.63	1.5344	1.4676	1.5271		1.5319	1.6239	1.4864		1.5767	1.6109	1.5971		1.5767	1.5466	1.5181
7.64	1.4253	1.6361	1.4302		1.5897	1.4204	1.5181		1.6182	1.7534	1.6231		7.64	1.5425	1.4733	1.5401		1.5295	1.6361	1.4872		1.5678	1.6085	1.5897		1.5808	1.545	1.5246
7.65	1.4074	1.6484	1.44		1.6003	1.4253	1.5165		1.6101	1.746	1.6133		7.65	1.5588	1.4831	1.5507		1.5271	1.6418	1.4961		1.5661	1.6174	1.5889		1.5792	1.5499	1.5222
7.66	1.3936	1.6581	1.4457		1.6142	1.4147	1.51		1.6182	1.7395	1.6077		7.66	1.5515	1.4807	1.5539		1.5279	1.6199	1.4929		1.5661	1.6044	1.5881		1.584	1.5523	1.5124
7.67	1.3879	1.6728	1.4416		1.6174	1.4164	1.5067		1.6272	1.7338	1.6158		7.67	1.5246	1.475	1.5393		1.523	1.6125	1.4904		1.5507	1.5946	1.593		1.5808	1.5425	1.5165
7.68	1.3805	1.676	1.44		1.6011	1.409	1.4961		1.6166	1.7354	1.6304		7.68	1.5132	1.4725	1.5319		1.523	1.6077	1.4896		1.5376	1.5881	1.5873		1.5832	1.5547	1.5206
7.69	1.3854	1.6671	1.4416		1.6011	1.4237	1.5059		1.6166	1.7346	1.6378		7.69	1.5124	1.4733	1.523		1.514	1.6117	1.5132		1.5319	1.5849	1.5865		1.5775	1.549	1.5352
7.7	1.3862	1.6622	1.44		1.615	1.4269	1.5287		1.615	1.7354	1.6264		7.7	1.5303	1.479	1.5214		1.5132	1.6068	1.5401		1.5393	1.584	1.5718		1.571	1.5531	1.5328
7.71	1.405	1.6654	1.4375		1.6427	1.4326	1.5466		1.6223	1.7371	1.6133		7.71	1.5189	1.475	1.514		1.501	1.606	1.5604		1.549	1.5946	1.5759		1.5637	1.5393	1.5352
7.72	1.4098	1.6939	1.4326		1.641	1.4229	1.5547		1.6199	1.7387	1.6077		7.72	1.5173	1.4652	1.5157		1.5075	1.6101	1.5442		1.5572	1.606	1.5865		1.5661	1.549	1.5409
7.73	1.4212	1.6915	1.4351		1.6231	1.4294	1.5523		1.6166	1.746	1.6158		7.73	1.5173	1.4628	1.5385		1.5173	1.6109	1.5173		1.5726	1.6133	1.5938		1.5767	1.5482	1.5311
7.74	1.4131	1.6817	1.4375		1.5954	1.4326	1.5409		1.6256	1.7493	1.6304		7.74	1.5238	1.4693	1.5515		1.5124	1.606	1.5092		1.5783	1.5971	1.5897		1.5857	1.5474	1.5222
7.75	1.4042	1.6581	1.444		1.5889	1.4481	1.5482		1.6272	1.7509	1.6304		7.75	1.5263	1.4725	1.5515		1.4994	1.6101	1.5149		1.5686	1.5954	1.5759		1.5792	1.5409	1.5149
7.76	1.3968	1.6581	1.4449		1.5954	1.4392	1.558		1.6337	1.7493	1.6239		7.76	1.536	1.4725	1.5263		1.4839	1.6109	1.5189		1.5653	1.6003	1.5726		1.5743	1.5482	1.5222
7.77	1.3928	1.6614	1.4465		1.5914	1.4302	1.5604		1.6329	1.7411	1.6052		7.77	1.5368	1.4619	1.5254		1.4888	1.615	1.5189		1.571	1.6068	1.571		1.5881	1.5629	1.5271
7.78	1.3944	1.6549	1.444		1.6011	1.4269	1.5531		1.6443	1.7379	1.6044		7.78	1.5385	1.4603	1.5311		1.4969	1.6036	1.5197		1.5767	1.606	1.5718		1.593	1.5751	1.5254
7.79	1.3846	1.6622	1.4514		1.5963	1.4294	1.5458		1.6386	1.7395	1.6077		7.79	1.5328	1.4587	1.5319		1.5116	1.5881	1.523		1.5604	1.5987	1.5726		1.5873	1.5588	1.5295
7.8	1.3862	1.6654	1.4619		1.5979	1.4278	1.5474		1.6288	1.7517	1.6199		7.8	1.5482	1.4717	1.5295		1.5246	1.584	1.5075		1.5547	1.6028	1.5629		1.5775	1.5433	1.5311
7.81	1.3968	1.6663	1.4595		1.5995	1.4237	1.5442		1.6117	1.746	1.6256		7.81	1.5523	1.4831	1.5214		1.5279	1.5963	1.4912		1.558	1.6093	1.5604		1.58	1.5417	1.5336
7.82	1.4188	1.6777	1.4603		1.6101	1.4343	1.5352		1.6166	1.7428	1.6215		7.82	1.549	1.4807	1.5376		1.5157	1.6133	1.4986		1.5702	1.6125	1.5718		1.5963	1.5556	1.5385
7.83	1.4237	1.6752	1.4481		1.615	1.4278	1.5344		1.6264	1.7411	1.6288		7.83	1.5466	1.4717	1.5499		1.5075	1.6142	1.5051		1.5661	1.615	1.5808		1.5971	1.571	1.5376
7.84	1.4343	1.6834	1.4278		1.6174	1.418	1.5295		1.6215	1.7387	1.6264		7.84	1.5539	1.4685	1.5588		1.4961	1.6077	1.5336		1.5661	1.6142	1.5808		1.6003	1.5767	1.5352
7.85	1.4253	1.6736	1.4269		1.6133	1.4074	1.536		1.6142	1.72	1.6313		7.85	1.5499	1.4766	1.5523		1.5035	1.6011	1.5409		1.5702	1.6304	1.5645		1.5849	1.5783	1.5328
7.86	1.431	1.6736	1.4269		1.6239	1.418	1.5376		1.6093	1.72	1.6321		7.86	1.5385	1.4725	1.5401		1.4961	1.5979	1.5588		1.5645	1.6321	1.5645		1.5889	1.5604	1.5197
7.87	1.4221	1.6801	1.4449		1.6256	1.4253	1.5507		1.6288	1.733	1.6247		7.87	1.5173	1.4839	1.5311		1.5075	1.593	1.5458		1.5409	1.6386	1.5726		1.5897	1.545	1.5295
7.88	1.4294	1.6768	1.4424		1.6223	1.4424	1.5507		1.637	1.742	1.6264		7.88	1.523	1.4839	1.5352		1.5059	1.6077	1.5442		1.5344	1.6256	1.5735		1.5971	1.5303	1.5254
7.89	1.4318	1.6907	1.4497		1.6085	1.4424	1.5433		1.6361	1.7379	1.615		7.89	1.5303	1.4807	1.5393		1.5018	1.6077	1.5319		1.545	1.6182	1.58		1.5897	1.5271	1.5368
7.9	1.431	1.6956	1.4514		1.5954	1.4326	1.5311		1.628	1.7371	1.6231		7.9	1.5474	1.4595	1.549		1.4986	1.602	1.5254		1.567	1.6166	1.5824		1.5824	1.5246	1.5271
7.91	1.4229	1.6964	1.4424		1.5938	1.409	1.5238		1.628	1.7411	1.619		7.91	1.5523	1.4489	1.5458		1.4994	1.5938	1.5197		1.5629	1.6207	1.5889		1.5783	1.5409	1.5303
7.92	1.4107	1.6744	1.4392		1.5995	1.4042	1.5214		1.6321	1.7371	1.619		7.92	1.5539	1.4628	1.5466		1.5124	1.6011	1.5173		1.5637	1.6378	1.5865		1.5767	1.549	1.5271
7.93	1.3968	1.6532	1.4302		1.6011	1.3903	1.5328		1.628	1.7436	1.6199		7.93	1.558	1.4725	1.5368		1.5124	1.6199	1.5385		1.5572	1.628	1.5914		1.571	1.5466	1.5254
7.94	1.3985	1.6671	1.4351		1.6052	1.3895	1.5499		1.6247	1.7452	1.619		7.94	1.5629	1.4766	1.5344		1.51	1.6247	1.5393		1.571	1.6231	1.5873		1.5604	1.5442	1.5287
7.95	1.405	1.6728	1.431		1.6052	1.3919	1.5637		1.6223	1.7501	1.6199		7.95	1.5726	1.4676	1.5303		1.5116	1.6247	1.5482		1.5515	1.6166	1.5718		1.5629	1.5433	1.5271
7.96	1.4204	1.6907	1.4278		1.6028	1.4139	1.5613		1.6215	1.7436	1.6117		7.96	1.5621	1.4652	1.5474		1.5222	1.6158	1.5238		1.5596	1.6142	1.558		1.5702	1.5588	1.523
7.97	1.4286	1.6882	1.4261		1.5889	1.4196	1.5604		1.6093	1.7411	1.6109		7.97	1.5474	1.4668	1.5596		1.5149	1.6125	1.514		1.5547	1.6142	1.5572		1.5857	1.5645	1.5092
7.98	1.4505	1.707	1.4318		1.5783	1.4204	1.5735		1.5987	1.7363	1.6085		7.98	1.5376	1.4685	1.5417		1.5059	1.6199	1.5059		1.5743	1.6125	1.5604		1.5963	1.5743	1.5059
7.99	1.4465	1.7184	1.4318		1.5783	1.418	1.5637		1.6003	1.7232	1.628		7.99	1.523	1.4619	1.5197		1.5002	1.6125	1.5157		1.5678	1.619	1.558		1.5865	1.5775	1.5059
8	1.4449	1.7159	1.4335		1.5946	1.4172	1.5466		1.6052	1.7118	1.6467		8	1.5254	1.4611	1.5059		1.5165	1.6109	1.5222		1.5661	1.6231	1.5678		1.5938	1.5629	1.5157
8.01	1.4212	1.6956	1.4335		1.6068	1.4155	1.5263		1.6077	1.7118	1.663		8.01	1.5393	1.4717	1.5238		1.5303	1.6068	1.5246		1.5629	1.6199	1.5889		1.5954	1.5588	1.5026
8.02	1.4261	1.6842	1.4473		1.6231	1.4025	1.5295		1.5938	1.7192	1.6492		8.02	1.5531	1.4815	1.5442		1.5352	1.6101	1.536		1.5759	1.6174	1.6093		1.6052	1.5425	1.5157
8.03	1.4253	1.6801	1.4571		1.619	1.4025	1.5409		1.5906	1.7306	1.6386		8.03	1.5539	1.4823	1.5499		1.5222	1.6142	1.5425		1.5735	1.6182	1.615		1.5971	1.5474	1.5116
8.04	1.4253	1.6939	1.4644		1.6117	1.4115	1.545		1.5897	1.7428	1.6296		8.04	1.5433	1.4562	1.5637		1.5124	1.6142	1.5328		1.5743	1.602	1.6109		1.5881	1.5466	1.5344
8.05	1.4025	1.6923	1.4603		1.6044	1.4261	1.5433		1.6142	1.742	1.6313		8.05	1.5442	1.4505	1.5572		1.5165	1.6264	1.514		1.5637	1.6011	1.6003		1.5906	1.5474	1.5246
8.06	1.3985	1.6817	1.4562		1.6068	1.4253	1.5393		1.6329	1.7534	1.6329		8.06	1.5482	1.4489	1.5621		1.5197	1.6199	1.5067		1.5637	1.6044	1.5914		1.5873	1.5539	1.514
8.07	1.4066	1.6679	1.4546		1.6125	1.4115	1.5319		1.6402	1.7493	1.6345		8.07	1.5409	1.4676	1.5458		1.5295	1.6215	1.5222		1.5726	1.6109	1.5897		1.5946	1.5735	1.5206
8.08	1.4221	1.6663	1.4571		1.6133	1.418	1.5466		1.6288	1.7468	1.6321		8.08	1.536	1.4815	1.5474		1.5311	1.6133	1.536		1.5718	1.6117	1.5897		1.593	1.5873	1.5157
8.09	1.4392	1.6834	1.4546		1.6142	1.4107	1.5564		1.619	1.7395	1.6247		8.09	1.5376	1.4912	1.5344		1.5458	1.6158	1.5263		1.5686	1.6028	1.5743		1.6093	1.5906	1.5303
8.1	1.4432	1.6752	1.4628		1.6296	1.4147	1.5637		1.641	1.7395	1.619		8.1	1.5393	1.5018	1.545		1.5442	1.6085	1.514		1.5604	1.6085	1.5588		1.6109	1.5661	1.5263
8.11	1.44	1.6744	1.4742		1.637	1.4082	1.5613		1.641	1.7444	1.6166		8.11	1.5433	1.4953	1.545		1.536	1.6117	1.5173		1.5621	1.6182	1.5499		1.6239	1.5401	1.536
8.12	1.4237	1.6663	1.4619		1.6418	1.4115	1.5515		1.6459	1.7468	1.6182		8.12	1.5319	1.5018	1.5499		1.5157	1.6133	1.5442		1.5686	1.6109	1.5637		1.6077	1.5214	1.5328
8.13	1.409	1.6809	1.4489		1.6313	1.4131	1.5515		1.6272	1.7444	1.6158		8.13	1.5319	1.488	1.5263		1.5059	1.6231	1.5547		1.5702	1.6077	1.5726		1.6044	1.523	1.5417
8.14	1.4212	1.6825	1.4237		1.6199	1.4278	1.5385		1.6272	1.7542	1.6207		8.14	1.5368	1.4896	1.523		1.4986	1.6256	1.5385		1.5824	1.602	1.584		1.6028	1.5466	1.5425
8.15	1.418	1.6834	1.4261		1.6207	1.4473	1.5401		1.6207	1.7558	1.6158		8.15	1.5376	1.4758	1.536		1.514	1.6329	1.5157		1.5808	1.6158	1.5914		1.6101	1.5629	1.5393
8.16	1.4164	1.6809	1.4253		1.6256	1.4489	1.5376		1.6247	1.7558	1.6361		8.16	1.5433	1.4782	1.5507		1.5238	1.6256	1.5173		1.5824	1.6231	1.5987		1.6068	1.5767	1.5336
8.17	1.4164	1.6817	1.4449		1.6199	1.4449	1.5417		1.6239	1.7403	1.6337		8.17	1.5547	1.4685	1.5556		1.5319	1.6174	1.5328		1.5808	1.6182	1.5889		1.593	1.5694	1.5385
8.18	1.4351	1.6752	1.4554		1.6125	1.4449	1.5482		1.6329	1.7387	1.637		8.18	1.5678	1.4652	1.5515		1.5206	1.5987	1.5328		1.5849	1.6077	1.5743		1.5946	1.5621	1.5409
8.19	1.4416	1.672	1.4693		1.6117	1.4449	1.5433		1.6353	1.7298	1.6239		8.19	1.5694	1.4782	1.5433		1.5132	1.5979	1.5165		1.5938	1.6068	1.5686		1.6003	1.5572	1.5279
8.2	1.4359	1.6768	1.466		1.641	1.4449	1.5433		1.641	1.7338	1.6313		8.2	1.5515	1.5035	1.523		1.5116	1.5995	1.5149		1.5889	1.6052	1.5694		1.5987	1.5547	1.5181
8.21	1.4115	1.6801	1.4636		1.6256	1.4335	1.5417		1.6288	1.7395	1.6378		8.21	1.5433	1.5222	1.5083		1.523	1.6166	1.5254		1.58	1.6207	1.5824		1.5938	1.558	1.5263
8.22	1.4155	1.6711	1.4554		1.6215	1.4424	1.5507		1.6272	1.7517	1.637		8.22	1.5336	1.5279	1.5214		1.5319	1.6133	1.5352		1.5637	1.619	1.5775		1.5775	1.5645	1.5279
8.23	1.4155	1.6679	1.4473		1.6085	1.4424	1.5499		1.6247	1.7534	1.6313		8.23	1.545	1.5116	1.5409		1.5263	1.6109	1.5352		1.5653	1.6313	1.5881		1.5816	1.5775	1.5328
8.24	1.4221	1.6736	1.4367		1.6386	1.4424	1.5499		1.6378	1.7387	1.6321		8.24	1.5539	1.5035	1.5515		1.5197	1.6068	1.5279		1.5743	1.628	1.5889		1.5767	1.5775	1.5287
8.25	1.4261	1.698	1.4318		1.6451	1.4383	1.5547		1.6443	1.7387	1.6239		8.25	1.5604	1.4953	1.5604		1.5181	1.6068	1.5287		1.5816	1.6313	1.5971		1.5979	1.5726	1.5336
8.26	1.4302	1.7004	1.4424		1.6378	1.4416	1.5466		1.6435	1.7428	1.615		8.26	1.5507	1.4986	1.5645		1.5328	1.606	1.5271		1.5824	1.6272	1.5971		1.6052	1.5678	1.5254
8.27	1.4424	1.7078	1.4546		1.6264	1.4481	1.5328		1.6337	1.7501	1.6052		8.27	1.5564	1.488	1.567		1.5425	1.6117	1.5319		1.5865	1.6207	1.5995		1.6166	1.5735	1.5409
8.28	1.4343	1.7159	1.4522		1.6435	1.4416	1.5303		1.6174	1.7477	1.6142		8.28	1.5564	1.4782	1.5653		1.5409	1.6231	1.5328		1.5971	1.6199	1.6117		1.6044	1.5751	1.5409
8.29	1.4155	1.7102	1.4522		1.6492	1.4196	1.5466		1.6223	1.7436	1.6239		8.29	1.5702	1.4717	1.5637		1.5222	1.6296	1.5271		1.593	1.6199	1.6133		1.5857	1.5808	1.5547
8.3	1.3993	1.7102	1.4432		1.6524	1.4253	1.567		1.6256	1.7509	1.6304		8.3	1.5499	1.4823	1.5621		1.5197	1.6337	1.536		1.5832	1.6313	1.6166		1.5849	1.5792	1.5466
8.31	1.3944	1.6972	1.4514		1.6321	1.4294	1.5686		1.6296	1.7534	1.6304		8.31	1.5482	1.4888	1.5531		1.5206	1.6361	1.5368		1.5556	1.6459	1.6158		1.5816	1.5775	1.5482
8.32	1.4058	1.6915	1.4383		1.6353	1.4473	1.5556		1.6239	1.7599	1.6182		8.32	1.5328	1.4839	1.5507		1.5279	1.641	1.536		1.5515	1.6524	1.6125		1.5946	1.5783	1.5474
8.33	1.4139	1.6882	1.44		1.6296	1.4505	1.5482		1.6288	1.7656	1.6125		8.33	1.5393	1.4774	1.5588		1.5295	1.6353	1.5393		1.5645	1.6402	1.6077		1.5857	1.5938	1.5401
8.34	1.4294	1.6858	1.4326		1.6304	1.4465	1.5425		1.6304	1.7534	1.6052		8.34	1.5458	1.4856	1.5637		1.5263	1.6435	1.549		1.5792	1.6207	1.5946		1.5857	1.6003	1.5507
8.35	1.4302	1.6907	1.4489		1.6264	1.4416	1.5539		1.6321	1.7477	1.6239		8.35	1.5515	1.5092	1.5572		1.5352	1.6475	1.5466		1.567	1.6117	1.5954		1.5783	1.6085	1.5385
8.36	1.4335	1.6947	1.4571		1.6231	1.4286	1.545		1.6296	1.7542	1.641		8.36	1.5596	1.5238	1.5474		1.5531	1.6492	1.5165		1.5515	1.6085	1.5954		1.5849	1.602	1.5458
8.37	1.4245	1.6939	1.4546		1.6223	1.44	1.5458		1.6272	1.7664	1.6492		8.37	1.5645	1.5173	1.5482		1.5653	1.6435	1.51		1.545	1.6109	1.5881		1.5938	1.5979	1.5279
8.38	1.431	1.6947	1.4587		1.6313	1.4603	1.5433		1.6321	1.7623	1.6443		8.38	1.5743	1.5018	1.5531		1.5637	1.6361	1.514		1.5613	1.6182	1.5824		1.5963	1.5897	1.5319
8.39	1.431	1.6947	1.4668		1.6394	1.4685	1.5401		1.6321	1.7428	1.637		8.39	1.5718	1.5002	1.5588		1.5539	1.637	1.5409		1.5629	1.6353	1.5751		1.5881	1.5767	1.5336
8.4	1.4465	1.7094	1.4782		1.6394	1.4546	1.5376		1.6329	1.7403	1.6386		8.4	1.5653	1.4978	1.5645		1.545	1.6264	1.5254		1.58	1.6394	1.571		1.5767	1.58	1.5311
8.41	1.4538	1.7167	1.4774		1.6272	1.431	1.5393		1.637	1.7501	1.6313		8.41	1.5629	1.4904	1.5694		1.5417	1.6288	1.5214		1.5873	1.6256	1.5653		1.5857	1.5661	1.5295
8.42	1.4562	1.698	1.4758		1.6174	1.418	1.5515		1.6443	1.7525	1.6394		8.42	1.571	1.4807	1.5564		1.5157	1.6158	1.5116		1.5946	1.615	1.5726		1.5995	1.571	1.5124
8.43	1.4432	1.6671	1.4742		1.6117	1.4286	1.549		1.6589	1.755	1.6337		8.43	1.5621	1.479	1.5409		1.5035	1.619	1.5189		1.5832	1.6125	1.5849		1.6036	1.5629	1.5165
8.44	1.4408	1.6565	1.4766		1.6085	1.4286	1.5474		1.6353	1.7574	1.6378		8.44	1.5735	1.4815	1.5376		1.5002	1.6223	1.5303		1.5735	1.6158	1.5987		1.5938	1.5629	1.514
8.45	1.44	1.672	1.4725		1.606	1.4269	1.5507		1.6207	1.7542	1.6239		8.45	1.5661	1.4758	1.5507		1.5206	1.6378	1.5425		1.5686	1.6166	1.5881		1.5873	1.5556	1.5319
8.46	1.4375	1.6907	1.4733		1.6011	1.4107	1.5613		1.6093	1.7582	1.6166		8.46	1.5751	1.4701	1.5393		1.5287	1.6549	1.5515		1.5718	1.6182	1.5865		1.5889	1.558	1.5417
8.47	1.431	1.6956	1.4611		1.619	1.4082	1.5613		1.6239	1.7542	1.6133		8.47	1.5572	1.4807	1.5352		1.536	1.6589	1.5328		1.5816	1.6264	1.5873		1.593	1.5694	1.5523
8.48	1.4351	1.6931	1.4685		1.6329	1.409	1.5604		1.6296	1.7582	1.6085		8.48	1.5637	1.4815	1.5271		1.5287	1.6451	1.5206		1.5865	1.6288	1.5954		1.5832	1.5751	1.549
8.49	1.4473	1.6842	1.4733		1.6386	1.4253	1.5588		1.6313	1.7542	1.6207		8.49	1.5588	1.488	1.545		1.5368	1.6313	1.5165		1.5889	1.6215	1.6052		1.58	1.5759	1.5482
8.5	1.4473	1.6931	1.4774		1.6256	1.4343	1.5694		1.6459	1.7501	1.6337		8.5	1.5507	1.4815	1.5474		1.5328	1.6247	1.5344		1.5857	1.6329	1.6085		1.584	1.5767	1.5564
8.51	1.4497	1.6947	1.4644		1.6109	1.4465	1.5621		1.6565	1.7525	1.6361		8.51	1.5507	1.4912	1.5613		1.5287	1.6207	1.5466		1.5849	1.6353	1.6077		1.5963	1.584	1.5596
8.52	1.4302	1.7078	1.453		1.6158	1.444	1.5474		1.6524	1.7428	1.6272		8.52	1.549	1.4831	1.567		1.514	1.6085	1.5515		1.5824	1.6394	1.6011		1.6142	1.5897	1.5588
8.53	1.4318	1.7086	1.4611		1.6223	1.4326	1.5417		1.641	1.7582	1.6264		8.53	1.5482	1.4815	1.567		1.501	1.606	1.5547		1.5857	1.6133	1.5897		1.6239	1.5865	1.5539
8.54	1.4212	1.7086	1.4758		1.6361	1.4212	1.5482		1.6361	1.7517	1.6296		8.54	1.5401	1.4782	1.5613		1.5132	1.6142	1.545		1.58	1.6052	1.584		1.6288	1.5832	1.5458
8.55	1.431	1.7053	1.4912		1.6427	1.4164	1.5759		1.6386	1.7501	1.6223		8.55	1.5482	1.4831	1.5547		1.5287	1.6158	1.5352		1.5653	1.6052	1.5865		1.6093	1.5816	1.549
8.56	1.4408	1.7004	1.4929		1.6353	1.4188	1.5808		1.6508	1.742	1.6077		8.56	1.5596	1.4815	1.5661		1.558	1.5987	1.5246		1.5645	1.6174	1.593		1.6044	1.5889	1.5474
8.57	1.4505	1.7004	1.4953		1.637	1.4196	1.5849		1.6516	1.7493	1.6288		8.57	1.5613	1.4937	1.5629		1.5645	1.6052	1.5401		1.5808	1.6264	1.602		1.5963	1.5963	1.5507
8.58	1.4514	1.7004	1.4896		1.6247	1.4343	1.5621		1.6386	1.7631	1.641		8.58	1.5547	1.5083	1.558		1.5588	1.6101	1.5596		1.5971	1.6353	1.5987		1.615	1.5954	1.549
8.59	1.4367	1.7061	1.475		1.6264	1.4465	1.5653		1.6296	1.7639	1.6573		8.59	1.5604	1.5189	1.5572		1.5417	1.6247	1.5645		1.5963	1.6231	1.6011		1.6125	1.5865	1.5547
8.6	1.4351	1.7029	1.475		1.6264	1.4546	1.5515		1.6215	1.7591	1.6475		8.6	1.5596	1.5149	1.5564		1.514	1.6247	1.5539		1.5857	1.619	1.5979		1.6166	1.5792	1.5653
8.61	1.4343	1.7053	1.4742		1.6394	1.4375	1.5466		1.6215	1.7623	1.6565		8.61	1.5482	1.5092	1.5621		1.5108	1.6394	1.5482		1.584	1.6272	1.6101		1.6028	1.5897	1.5572
8.62	1.4237	1.6964	1.4742		1.654	1.4253	1.5263		1.6174	1.7615	1.6597		8.62	1.5344	1.5059	1.5572		1.5108	1.6345	1.5344		1.58	1.6272	1.6077		1.5971	1.606	1.5466
8.63	1.4221	1.6996	1.4595		1.6484	1.4245	1.5328		1.628	1.768	1.6687		8.63	1.5295	1.5043	1.5499		1.5287	1.6321	1.5246		1.5914	1.628	1.6068		1.5889	1.6085	1.5238
8.64	1.4318	1.6988	1.4473		1.6532	1.4302	1.5474		1.6361	1.7737	1.6573		8.64	1.5401	1.5067	1.5409		1.5393	1.6264	1.5018		1.6052	1.619	1.5987		1.584	1.6068	1.5263
8.65	1.4611	1.707	1.4481		1.6467	1.4424	1.5564		1.6345	1.7729	1.6467		8.65	1.5547	1.5124	1.5385		1.5547	1.6427	1.5124		1.6158	1.6304	1.5979		1.5938	1.5938	1.5311
8.66	1.4693	1.7192	1.4522		1.6549	1.4432	1.549		1.6133	1.7827	1.6272		8.66	1.5564	1.5043	1.5556		1.5539	1.6492	1.5206		1.615	1.6345	1.6036		1.6036	1.5954	1.5499
8.67	1.4514	1.7306	1.4693		1.6492	1.4538	1.5539		1.6117	1.7721	1.6231		8.67	1.5547	1.4969	1.5718		1.5433	1.6402	1.5287		1.606	1.6304	1.5938		1.6109	1.5873	1.5442
8.68	1.4383	1.7249	1.4709		1.6435	1.4546	1.5637		1.615	1.7688	1.6199		8.68	1.5458	1.4896	1.5873		1.5319	1.6223	1.5295		1.5987	1.6337	1.5873		1.5987	1.5865	1.5393
8.69	1.4204	1.7216	1.4595		1.6353	1.4587	1.5767		1.6313	1.7485	1.6272		8.69	1.5556	1.4961	1.5922		1.5295	1.6003	1.523		1.5971	1.6166	1.5979		1.6011	1.5775	1.5376
8.7	1.4269	1.7053	1.4554		1.6337	1.4416	1.5629		1.6418	1.7411	1.6451		8.7	1.5596	1.4945	1.5995		1.5368	1.6133	1.5344		1.5963	1.6142	1.6117		1.6028	1.5694	1.5466
8.71	1.4367	1.6931	1.4628		1.6304	1.4383	1.5474		1.6427	1.7436	1.6459		8.71	1.5539	1.4937	1.5897		1.5442	1.6158	1.5303		1.5987	1.6174	1.6117		1.619	1.5678	1.558
8.72	1.4465	1.672	1.4766		1.628	1.4318	1.5368		1.6427	1.768	1.6288		8.72	1.5458	1.4978	1.5816		1.558	1.6394	1.5409		1.6003	1.6239	1.5889		1.6158	1.5694	1.5645
8.73	1.4636	1.6817	1.4693		1.6247	1.4375	1.5336		1.6329	1.7851	1.6321		8.73	1.5547	1.5092	1.567		1.5458	1.6321	1.5417		1.6052	1.6207	1.5767		1.6142	1.5735	1.5775
8.74	1.4644	1.7021	1.4554		1.6353	1.4318	1.5523		1.628	1.7949	1.6353		8.74	1.5678	1.5108	1.5531		1.5482	1.6427	1.5474		1.6085	1.6256	1.5857		1.6003	1.5702	1.5824
8.75	1.4554	1.72	1.4392		1.6386	1.4261	1.5621		1.6288	1.7892	1.6516		8.75	1.5808	1.4961	1.5556		1.5474	1.6418	1.549		1.5963	1.6386	1.593		1.6044	1.5735	1.5645
8.76	1.4375	1.7241	1.4449		1.6467	1.4408	1.567		1.6329	1.7884	1.637		8.76	1.5857	1.5108	1.5588		1.5482	1.641	1.5458		1.5914	1.6687	1.6101		1.5971	1.558	1.5482
8.77	1.4229	1.7151	1.4595		1.6353	1.4449	1.5596		1.6394	1.7778	1.6321		8.77	1.5889	1.5197	1.5637		1.5385	1.6565	1.5458		1.602	1.6646	1.6125		1.5938	1.5629	1.5336
8.78	1.44	1.7094	1.4799		1.6418	1.4473	1.5686		1.6467	1.7542	1.6337		8.78	1.5808	1.5303	1.558		1.5173	1.6508	1.5214		1.6133	1.6589	1.6166		1.5889	1.5621	1.545
8.79	1.4489	1.7021	1.4644		1.6386	1.4237	1.5783		1.6549	1.7501	1.6402		8.79	1.571	1.501	1.5564		1.5189	1.6606	1.5108		1.6052	1.6378	1.6044		1.5971	1.5759	1.5629
8.8	1.4424	1.7078	1.4481		1.6402	1.418	1.5873		1.6606	1.7656	1.6508		8.8	1.5702	1.4864	1.5564		1.5271	1.6492	1.5059		1.5865	1.628	1.5906		1.606	1.5792	1.5759
8.81	1.4318	1.7143	1.4392		1.6378	1.4204	1.5897		1.6532	1.7786	1.6484		8.81	1.558	1.4815	1.5466		1.5474	1.6549	1.5246		1.5775	1.6304	1.5979		1.6003	1.5792	1.5767
8.82	1.4294	1.7184	1.4546		1.6264	1.4359	1.5824		1.6492	1.7753	1.6451		8.82	1.5433	1.4921	1.5547		1.5572	1.6337	1.5344		1.5914	1.6133	1.6117		1.5922	1.5792	1.5726
8.83	1.4359	1.7249	1.4668		1.6231	1.4497	1.5613		1.6361	1.7599	1.6524		8.83	1.5328	1.4945	1.5531		1.5442	1.6353	1.5433		1.6101	1.6239	1.6272		1.5865	1.5735	1.5637
8.84	1.444	1.7135	1.4725		1.6272	1.4465	1.5458		1.6378	1.7525	1.6589		8.84	1.5507	1.4864	1.5621		1.536	1.6451	1.5507		1.6142	1.6313	1.6247		1.5873	1.5751	1.5653
8.85	1.4343	1.7053	1.4701		1.641	1.4416	1.5556		1.6264	1.7534	1.6606		8.85	1.558	1.4961	1.5433		1.5344	1.6752	1.5401		1.619	1.654	1.619		1.6028	1.5726	1.5547
8.86	1.4269	1.7037	1.4733		1.641	1.4359	1.5686		1.6321	1.7672	1.6524		8.86	1.5678	1.5059	1.5401		1.5409	1.6695	1.536		1.6093	1.6687	1.6215		1.6182	1.5865	1.5523
8.87	1.4212	1.7021	1.4668		1.6256	1.4351	1.5718		1.628	1.7802	1.6532		8.87	1.5637	1.5083	1.5344		1.5417	1.6524	1.5303		1.6215	1.6671	1.6199		1.6239	1.5963	1.5531
8.88	1.4253	1.6964	1.4807		1.6207	1.4302	1.5751		1.637	1.7827	1.6459		8.88	1.5694	1.4856	1.5401		1.5539	1.6182	1.5336		1.6101	1.6663	1.6052		1.6231	1.6085	1.5474
8.89	1.4424	1.6801	1.4782		1.6256	1.4343	1.5824		1.6329	1.7688	1.6394		8.89	1.5751	1.4701	1.5637		1.5572	1.6174	1.5393		1.5954	1.654	1.5889		1.6239	1.6085	1.5523
8.9	1.4375	1.685	1.4856		1.6353	1.4302	1.5897		1.6304	1.7672	1.6296		8.9	1.567	1.4823	1.5702		1.5433	1.6288	1.5393		1.5792	1.641	1.5849		1.6215	1.5995	1.549
8.91	1.4343	1.6923	1.4815		1.6451	1.4416	1.5865		1.6418	1.7639	1.6492		8.91	1.5653	1.4994	1.5816		1.5303	1.6614	1.549		1.58	1.637	1.5906		1.6199	1.5914	1.5458
8.92	1.4278	1.6882	1.479		1.6597	1.44	1.5653		1.6451	1.7696	1.6573		8.92	1.5588	1.5108	1.5653		1.5417	1.6785	1.5482		1.5881	1.6321	1.5963		1.6003	1.5824	1.5482
8.93	1.4392	1.6891	1.4742		1.663	1.4546	1.5564		1.6418	1.7648	1.6597		8.93	1.5751	1.4986	1.5645		1.5604	1.6793	1.5474		1.602	1.6549	1.5995		1.5971	1.5889	1.5442
8.94	1.4538	1.6915	1.4554		1.672	1.4514	1.5368		1.6394	1.7656	1.6467		8.94	1.5783	1.4978	1.5653		1.5629	1.6679	1.5507		1.5946	1.6671	1.6125		1.5938	1.5963	1.5564
8.95	1.4408	1.6956	1.4619		1.6663	1.4497	1.5499		1.6427	1.7721	1.6435		8.95	1.5881	1.5002	1.5686		1.5547	1.6573	1.5482		1.5922	1.6728	1.6158		1.5979	1.6133	1.5531
8.96	1.4286	1.7102	1.4522		1.6581	1.4432	1.5572		1.6589	1.7729	1.6451		8.96	1.5702	1.5043	1.5686		1.5482	1.6475	1.5523		1.5897	1.6597	1.6158		1.602	1.6142	1.5507
8.97	1.4212	1.7127	1.4644		1.6427	1.4465	1.5775		1.654	1.7713	1.6451		8.97	1.5702	1.4978	1.5661		1.5466	1.6524	1.5523		1.5914	1.6557	1.6182		1.6003	1.615	1.5474
8.98	1.4326	1.7241	1.4628		1.641	1.4505	1.5792		1.663	1.7631	1.65		8.98	1.5556	1.4904	1.5702		1.5376	1.6695	1.5588		1.5881	1.6492	1.6125		1.606	1.6003	1.5466
8.99	1.4318	1.7102	1.4725		1.6516	1.4603	1.5792		1.6597	1.7664	1.6516		8.99	1.5613	1.4969	1.5767		1.5319	1.6777	1.5588		1.5865	1.6532	1.6142		1.6068	1.5816	1.5507
9	1.4286	1.7127	1.4774		1.6573	1.4619	1.5759		1.6622	1.7648	1.6597		9	1.5653	1.4961	1.5759		1.5433	1.6736	1.5499		1.5889	1.6378	1.602		1.5971	1.5775	1.5466
9.01	1.418	1.7135	1.4725		1.6573	1.4546	1.5588		1.6378	1.7607	1.6573		9.01	1.5653	1.4994	1.567		1.5466	1.6549	1.5385		1.6068	1.6427	1.5971		1.5881	1.5775	1.5539
9.02	1.4196	1.7078	1.4807		1.6508	1.444	1.5425		1.6272	1.7656	1.654		9.02	1.5564	1.5026	1.571		1.5556	1.654	1.5328		1.6109	1.6394	1.5946		1.5857	1.5946	1.5629
9.03	1.4212	1.6988	1.4701		1.6467	1.4359	1.5368		1.6125	1.7696	1.6516		9.03	1.5466	1.5157	1.5735		1.5539	1.6492	1.5368		1.6264	1.6492	1.5914		1.6052	1.6011	1.5613
9.04	1.4351	1.6964	1.4799		1.6508	1.4375	1.5686		1.6239	1.7745	1.6508		9.04	1.5564	1.5311	1.5759		1.5523	1.6361	1.5336		1.6182	1.6443	1.6068		1.6215	1.5922	1.558
9.05	1.4481	1.7118	1.4856		1.6565	1.4392	1.5938		1.6239	1.7623	1.6638		9.05	1.5743	1.5279	1.5726		1.5466	1.6256	1.536		1.6077	1.6329	1.6133		1.6239	1.5759	1.549
9.06	1.4449	1.7192	1.4921		1.6606	1.4367	1.5954		1.6288	1.7582	1.6484		9.06	1.5816	1.5092	1.5621		1.5336	1.6313	1.5393		1.5922	1.6313	1.6207		1.6125	1.5767	1.549
9.07	1.4424	1.7167	1.4758		1.6508	1.4318	1.5694		1.6199	1.7696	1.6508		9.07	1.5775	1.4945	1.5539		1.5287	1.6394	1.5523		1.5897	1.6386	1.6125		1.6068	1.5881	1.5482
9.08	1.4302	1.7118	1.4554		1.6459	1.4375	1.5572		1.6313	1.7688	1.654		9.08	1.5694	1.4986	1.5311		1.5401	1.6427	1.549		1.6044	1.6573	1.6093		1.5897	1.6052	1.5564
9.09	1.431	1.7094	1.4538		1.6451	1.4449	1.558		1.6386	1.7672	1.685		9.09	1.5759	1.5043	1.5254		1.5564	1.6443	1.5417		1.6142	1.6589	1.6044		1.5963	1.5946	1.5686
9.1	1.4392	1.7094	1.4603		1.6492	1.4603	1.5621		1.6589	1.7574	1.6972		9.1	1.5857	1.4986	1.5279		1.5645	1.6484	1.5368		1.6231	1.6549	1.5987		1.5995	1.5889	1.571
9.11	1.4481	1.7045	1.466		1.6671	1.4644	1.5613		1.6492	1.7656	1.6785		9.11	1.5995	1.4986	1.5425		1.5564	1.6516	1.5409		1.6125	1.6427	1.593		1.6133	1.5889	1.5686
9.12	1.4685	1.7037	1.4685		1.654	1.4668	1.5596		1.6475	1.7802	1.6606		9.12	1.6052	1.5026	1.5523		1.5393	1.637	1.5458		1.606	1.641	1.606		1.6068	1.6044	1.5653
9.13	1.4693	1.7004	1.4676		1.6459	1.4725	1.5596		1.6492	1.7884	1.6508		9.13	1.5922	1.5067	1.5653		1.5482	1.637	1.5458		1.6011	1.6459	1.6239		1.6028	1.606	1.5556
9.14	1.4758	1.7094	1.4758		1.6313	1.4709	1.549		1.6557	1.7892	1.6573		9.14	1.5702	1.5165	1.5735		1.5596	1.6418	1.5474		1.6052	1.6589	1.6337		1.6085	1.6077	1.5482
9.15	1.4652	1.7053	1.4807		1.6443	1.4742	1.5442		1.65	1.7778	1.654		9.15	1.5604	1.5263	1.571		1.5678	1.6484	1.5539		1.6093	1.6597	1.6337		1.6133	1.6036	1.5482
9.16	1.4652	1.7102	1.4774		1.6654	1.4611	1.5499		1.6402	1.7884	1.6451		9.16	1.5637	1.5336	1.5621		1.5694	1.6475	1.5572		1.5889	1.6565	1.6207		1.6077	1.6052	1.5523
9.17	1.44	1.7135	1.4636		1.6752	1.4562	1.5686		1.6427	1.7932	1.6337		9.17	1.5686	1.5206	1.5531		1.5694	1.6451	1.5515		1.5702	1.6459	1.6068		1.5979	1.5946	1.5458
9.18	1.4375	1.7159	1.4562		1.6834	1.4505	1.5849		1.6484	1.7851	1.65		9.18	1.5686	1.5075	1.5556		1.5767	1.6606	1.5523		1.5759	1.641	1.593		1.5914	1.584	1.5393
9.19	1.444	1.7135	1.4587		1.6801	1.453	1.5783		1.6597	1.7501	1.65		9.19	1.5702	1.4978	1.5556		1.5661	1.6597	1.5547		1.6117	1.6304	1.5824		1.6028	1.5702	1.5344
9.2	1.4603	1.7118	1.4644		1.672	1.4554	1.5743		1.6654	1.7468	1.6589		9.2	1.5792	1.5051	1.5564		1.5531	1.6606	1.5588		1.6223	1.6296	1.5865		1.6101	1.5759	1.5393
9.21	1.4587	1.7216	1.453		1.6687	1.4449	1.5596		1.6663	1.742	1.6394		9.21	1.5792	1.5026	1.5547		1.5425	1.6435	1.5474		1.6199	1.6296	1.5987		1.6231	1.5816	1.5385
9.22	1.4489	1.7257	1.4619		1.6614	1.4416	1.5702		1.654	1.7582	1.6492		9.22	1.5792	1.5075	1.5507		1.5499	1.6492	1.5319		1.5971	1.637	1.6085		1.6304	1.606	1.5319
9.23	1.4473	1.7184	1.4619		1.6711	1.4408	1.5678		1.6394	1.7623	1.6508		9.23	1.5832	1.5035	1.5531		1.5629	1.6427	1.5279		1.5987	1.6345	1.6174		1.6345	1.6028	1.5344
9.24	1.4522	1.7232	1.4685		1.6671	1.4408	1.5816		1.6353	1.7851	1.6597		9.24	1.5897	1.5197	1.5547		1.5678	1.6459	1.5352		1.6044	1.6418	1.6101		1.6321	1.6117	1.5515
9.25	1.4505	1.733	1.4628		1.6711	1.4383	1.5743		1.6459	1.7924	1.6508		9.25	1.5889	1.5206	1.5629		1.5539	1.6581	1.5466		1.6223	1.6394	1.6133		1.615	1.5971	1.5653
9.26	1.4359	1.7485	1.4709		1.6614	1.4489	1.5726		1.6524	1.7916	1.6589		9.26	1.5865	1.51	1.5775		1.5474	1.6687	1.5385		1.6199	1.6557	1.6166		1.6068	1.5979	1.5637
9.27	1.4229	1.7322	1.4864		1.65	1.4758	1.5726		1.654	1.7924	1.6492		9.27	1.5808	1.4978	1.5865		1.5523	1.6825	1.5319		1.6036	1.6614	1.6174		1.6028	1.5808	1.5539
9.28	1.4245	1.7249	1.4953		1.6484	1.4831	1.5881		1.6492	1.7786	1.641		9.28	1.5735	1.4912	1.5857		1.5474	1.6654	1.523		1.5938	1.6695	1.6272		1.6052	1.5792	1.5482
9.29	1.453	1.7061	1.4839		1.6508	1.4652	1.5922		1.663	1.7705	1.6304		9.29	1.5718	1.4953	1.5792		1.5409	1.6549	1.5393		1.6068	1.6597	1.6296		1.6256	1.584	1.5539
9.3	1.4782	1.7004	1.479		1.6532	1.4489	1.5897		1.6703	1.7631	1.6345		9.3	1.5678	1.4986	1.5775		1.5368	1.6418	1.5474		1.6174	1.6573	1.6231		1.6288	1.5897	1.5547
9.31	1.4766	1.7061	1.4758		1.6492	1.4408	1.5954		1.6654	1.7745	1.6532		9.31	1.5596	1.4953	1.5808		1.5482	1.6484	1.5653		1.6109	1.6597	1.6182		1.6329	1.6003	1.5515
9.32	1.4636	1.7061	1.4847		1.6427	1.4497	1.5954		1.6606	1.777	1.6736		9.32	1.5442	1.4994	1.5873		1.5604	1.6614	1.5629		1.6101	1.6638	1.5995		1.615	1.5971	1.5572
9.33	1.453	1.7208	1.4725		1.6516	1.4538	1.5922		1.6524	1.7542	1.6752		9.33	1.5376	1.4888	1.5922		1.5564	1.6614	1.5653		1.6182	1.6638	1.6068		1.6199	1.5971	1.5515
9.34	1.4685	1.711	1.4847		1.6532	1.4619	1.5629		1.6557	1.7501	1.6711		9.34	1.5572	1.4969	1.5995		1.5653	1.6532	1.5474		1.6256	1.6695	1.6085		1.6361	1.5954	1.5547
9.35	1.4676	1.7192	1.4888		1.654	1.4628	1.5588		1.6443	1.7493	1.6475		9.35	1.5767	1.4904	1.5759		1.5637	1.6451	1.5507		1.6166	1.6703	1.6068		1.6451	1.6011	1.5547
9.36	1.4489	1.7102	1.5018		1.6435	1.4636	1.5629		1.6638	1.7843	1.6516		9.36	1.5849	1.5051	1.5686		1.567	1.6565	1.5409		1.6068	1.6728	1.5987		1.6402	1.6142	1.5531
9.37	1.4221	1.7159	1.4978		1.6467	1.4668	1.5718		1.6597	1.7884	1.6443		9.37	1.5775	1.5132	1.567		1.5531	1.6622	1.5523		1.6068	1.6703	1.5889		1.6288	1.6117	1.5661
9.38	1.4221	1.7232	1.501		1.6443	1.4628	1.5857		1.6638	1.79	1.6459		9.38	1.5783	1.5002	1.5865		1.5458	1.6573	1.5515		1.6085	1.663	1.5979		1.6215	1.6109	1.5726
9.39	1.4392	1.7314	1.4961		1.6508	1.4489	1.5767		1.654	1.7827	1.6459		9.39	1.5808	1.4896	1.5702		1.5547	1.6378	1.5621		1.6158	1.6549	1.6093		1.6109	1.6028	1.5808
9.4	1.4497	1.7371	1.488		1.641	1.4335	1.5751		1.65	1.7802	1.654		9.4	1.571	1.4782	1.5686		1.5686	1.6378	1.5564		1.6117	1.6565	1.6174		1.5979	1.6028	1.5816
9.41	1.4514	1.7468	1.4709		1.6329	1.4302	1.5621		1.6549	1.7884	1.6589		9.41	1.5621	1.5002	1.567		1.5743	1.6427	1.5499		1.6174	1.6646	1.6142		1.6011	1.6068	1.5637
9.42	1.4449	1.7582	1.4571		1.6402	1.4505	1.5604		1.6435	1.79	1.6606		9.42	1.5678	1.4994	1.5775		1.5694	1.6508	1.5336		1.6109	1.6736	1.6199		1.6085	1.6077	1.5653
9.43	1.4392	1.7558	1.4505		1.6484	1.4668	1.5743		1.6484	1.7941	1.6573		9.43	1.5897	1.5043	1.5775		1.5629	1.6549	1.5303		1.619	1.6728	1.6304		1.6231	1.6036	1.5645
9.44	1.4457	1.7371	1.4595		1.6679	1.4701	1.5857		1.6345	1.7916	1.6687		9.44	1.5938	1.5043	1.5816		1.5556	1.6516	1.5368		1.6158	1.672	1.6459		1.6313	1.5897	1.567
9.45	1.4595	1.7249	1.4823		1.6532	1.4742	1.5979		1.6231	1.7802	1.6793		9.45	1.5881	1.5132	1.5889		1.5401	1.6557	1.5474		1.6239	1.6597	1.6402		1.6304	1.5808	1.5621
9.46	1.4742	1.7102	1.4831		1.6484	1.4815	1.5995		1.6288	1.7786	1.6834		9.46	1.5751	1.5214	1.5897		1.5287	1.6484	1.5572		1.6093	1.6492	1.6304		1.6345	1.5816	1.5393
9.47	1.4685	1.707	1.4766		1.6418	1.4847	1.6011		1.6418	1.7713	1.6768		9.47	1.5792	1.5197	1.584		1.5206	1.6581	1.5531		1.6011	1.6353	1.615		1.6337	1.5938	1.5263
9.48	1.4652	1.711	1.4619		1.6549	1.466	1.5987		1.6484	1.7729	1.6695		9.48	1.567	1.5189	1.5906		1.5336	1.6581	1.558		1.593	1.6402	1.5938		1.6418	1.5979	1.5149
9.49	1.4562	1.7265	1.4693		1.6565	1.4457	1.5873		1.6427	1.7631	1.6744		9.49	1.5735	1.5197	1.5881		1.5393	1.6614	1.5539		1.5995	1.6475	1.5979		1.6247	1.5987	1.5279
9.5	1.4562	1.7306	1.4799		1.6516	1.4489	1.5775		1.6443	1.7737	1.6671		9.5	1.5629	1.5279	1.5726		1.5572	1.6606	1.5596		1.606	1.6532	1.6036		1.6125	1.5897	1.5442
9.51	1.4652	1.7306	1.4725		1.6427	1.4562	1.5751		1.6638	1.7786	1.6622		9.51	1.5694	1.5263	1.5637		1.5621	1.6736	1.5482		1.5995	1.6654	1.6321		1.6011	1.5995	1.558
9.52	1.4668	1.7241	1.4685		1.6329	1.4636	1.5832		1.663	1.7884	1.6516		9.52	1.5686	1.5189	1.5661		1.5881	1.6882	1.5564		1.6117	1.6606	1.6215		1.6077	1.6011	1.5735
9.53	1.4603	1.7265	1.4676		1.6418	1.4579	1.5914		1.6508	1.7949	1.6459		9.53	1.5726	1.5002	1.5849		1.5906	1.6915	1.5531		1.6264	1.6744	1.6256		1.6199	1.6003	1.5751
9.54	1.4424	1.7192	1.4831		1.6378	1.4554	1.5873		1.6418	1.8022	1.6418		9.54	1.5775	1.501	1.5783		1.58	1.7013	1.5735		1.637	1.6695	1.5987		1.6272	1.5824	1.5596
9.55	1.4595	1.72	1.4774		1.6492	1.4579	1.58		1.6492	1.8177	1.6484		9.55	1.5792	1.5075	1.5564		1.5523	1.6923	1.5718		1.6402	1.6711	1.6142		1.6264	1.58	1.5474
9.56	1.479	1.7289	1.4701		1.654	1.4644	1.5661		1.654	1.7973	1.6549		9.56	1.5743	1.514	1.5303		1.5368	1.6842	1.5751		1.6329	1.663	1.6052		1.6264	1.5857	1.5401
9.57	1.4774	1.7354	1.4799		1.672	1.4782	1.584		1.6516	1.7973	1.6475		9.57	1.5661	1.5165	1.5393		1.5328	1.6565	1.5507		1.6329	1.6622	1.6117		1.6239	1.6028	1.5678
9.58	1.4619	1.7371	1.4969		1.663	1.4782	1.5824		1.6394	1.7884	1.641		9.58	1.5637	1.5189	1.5507		1.5287	1.6386	1.5393		1.6321	1.663	1.6133		1.6142	1.6199	1.5808
9.59	1.4375	1.7273	1.5149		1.663	1.4864	1.5938		1.6435	1.7981	1.6378		9.59	1.571	1.5303	1.5694		1.5271	1.6329	1.5287		1.6231	1.6516	1.6142		1.6239	1.6166	1.5865
9.6	1.4522	1.7257	1.4986		1.6532	1.4839	1.5726		1.6402	1.7859	1.6516		9.6	1.58	1.5368	1.5661		1.5238	1.6337	1.545		1.628	1.6402	1.6321		1.6296	1.6142	1.571
9.61	1.4546	1.7224	1.4929		1.672	1.479	1.5767		1.6418	1.7867	1.6549		9.61	1.5954	1.536	1.5743		1.5344	1.6394	1.5499		1.6142	1.6361	1.6247		1.6557	1.5922	1.558
9.62	1.4709	1.7061	1.4815		1.6703	1.466	1.5645		1.641	1.7859	1.6589		9.62	1.5971	1.5254	1.5849		1.5507	1.6508	1.5482		1.6142	1.6435	1.6378		1.6345	1.5938	1.5678
9.63	1.4611	1.6996	1.4807		1.6654	1.4473	1.5783		1.6606	1.8006	1.6597		9.63	1.5922	1.523	1.5865		1.567	1.654	1.5466		1.6142	1.65	1.6272		1.6337	1.5954	1.5914
9.64	1.4603	1.711	1.4782		1.6581	1.4546	1.5629		1.6687	1.7884	1.6532		9.64	1.5621	1.514	1.5808		1.5767	1.6573	1.5539		1.6199	1.65	1.6296		1.6199	1.6036	1.5987
9.65	1.4505	1.7241	1.4628		1.654	1.4579	1.558		1.6671	1.7884	1.6492		9.65	1.5629	1.5238	1.5629		1.5808	1.6402	1.5661		1.6239	1.6581	1.615		1.6272	1.5922	1.5963
9.66	1.4505	1.7338	1.4652		1.6711	1.466	1.5596		1.6451	1.7981	1.6484		9.66	1.5621	1.5206	1.5645		1.5775	1.6329	1.5621		1.6003	1.6622	1.6166		1.6207	1.571	1.5881
9.67	1.4489	1.733	1.4758		1.6842	1.4571	1.5816		1.6484	1.8095	1.6549		9.67	1.5743	1.5254	1.5629		1.5621	1.6394	1.5645		1.6093	1.6679	1.6093		1.619	1.5849	1.5914
9.68	1.453	1.746	1.4831		1.6915	1.4571	1.6117		1.65	1.8136	1.6654		9.68	1.5726	1.5197	1.5531		1.5523	1.6557	1.5702		1.615	1.6695	1.6101		1.6044	1.6044	1.584
9.69	1.4522	1.7444	1.4831		1.6703	1.4497	1.6101		1.6728	1.7989	1.6573		9.69	1.5808	1.5197	1.5547		1.5417	1.6679	1.5718		1.6329	1.6703	1.6174		1.6044	1.6223	1.5792
9.7	1.4587	1.7436	1.4701		1.6557	1.4587	1.6093		1.6728	1.7916	1.6581		9.7	1.5938	1.51	1.5466		1.549	1.6768	1.5767		1.606	1.6557	1.6256		1.5995	1.6109	1.5743
9.71	1.4603	1.7411	1.4823		1.6467	1.4709	1.5987		1.6606	1.7957	1.6492		9.71	1.6011	1.51	1.5564		1.5482	1.6809	1.5523		1.5971	1.6492	1.6492		1.6182	1.5987	1.5759
9.72	1.4742	1.7346	1.4823		1.6508	1.4896	1.5922		1.6394	1.7908	1.654		9.72	1.5954	1.51	1.5474		1.5572	1.6882	1.5433		1.5987	1.6361	1.6427		1.6272	1.5881	1.5751
9.73	1.4815	1.7232	1.4831		1.6516	1.4945	1.5865		1.6329	1.7949	1.6663		9.73	1.5718	1.5149	1.5621		1.5588	1.6842	1.5393		1.615	1.6565	1.628		1.6247	1.5857	1.5832
9.74	1.488	1.7127	1.4725		1.6443	1.4937	1.5849		1.641	1.777	1.676		9.74	1.5572	1.5149	1.5694		1.549	1.6858	1.5629		1.6304	1.6597	1.6125		1.619	1.5995	1.5857
9.75	1.479	1.7216	1.4766		1.6573	1.4799	1.5963		1.6386	1.7802	1.6703		9.75	1.5539	1.5083	1.5743		1.5482	1.6866	1.5759		1.6313	1.6679	1.6215		1.6207	1.6044	1.5963
9.76	1.475	1.7314	1.4733		1.6695	1.4579	1.6011		1.6353	1.7705	1.6557		9.76	1.5678	1.5059	1.5726		1.5385	1.676	1.5653		1.6142	1.6597	1.6264		1.6256	1.6085	1.5865
9.77	1.475	1.7346	1.4912		1.6793	1.44	1.5946		1.6394	1.7859	1.65		9.77	1.5759	1.5018	1.5775		1.5474	1.6638	1.5604		1.5849	1.6606	1.6353		1.6215	1.5995	1.5938
9.78	1.4733	1.7428	1.4912		1.672	1.4481	1.5914		1.6451	1.7941	1.6516		9.78	1.5857	1.5026	1.5849		1.5515	1.6492	1.5637		1.5759	1.6752	1.6304		1.6264	1.5971	1.5954
9.79	1.466	1.7338	1.4856		1.6646	1.4644	1.5922		1.6532	1.8055	1.6459		9.79	1.5865	1.51	1.5816		1.5596	1.6427	1.5653		1.584	1.6646	1.6272		1.641	1.5922	1.5963
9.8	1.4644	1.7363	1.4766		1.6646	1.4668	1.5914		1.6508	1.7916	1.6427		9.8	1.5857	1.5132	1.5865		1.5751	1.6484	1.558		1.5971	1.6549	1.6142		1.6597	1.5979	1.5857
9.81	1.4628	1.7273	1.4636		1.6711	1.4603	1.5857		1.6573	1.7802	1.6435		9.81	1.5865	1.5254	1.5808		1.584	1.6484	1.5425		1.6028	1.6549	1.6117		1.6459	1.5987	1.5775
9.82	1.4546	1.7281	1.4799		1.6671	1.4554	1.5914		1.6492	1.7818	1.6427		9.82	1.5865	1.5238	1.5881		1.5922	1.6549	1.5499		1.6182	1.6597	1.6174		1.628	1.5963	1.5547
9.83	1.4514	1.7249	1.4872		1.6589	1.4603	1.5971		1.6524	1.8014	1.6418		9.83	1.5767	1.5214	1.584		1.5816	1.6532	1.5604		1.6223	1.6565	1.6207		1.6199	1.5938	1.5458
9.84	1.4554	1.7184	1.501		1.6638	1.4676	1.5914		1.6549	1.8152	1.6427		9.84	1.5645	1.5157	1.5865		1.5743	1.6549	1.5686		1.6158	1.641	1.619		1.6272	1.5987	1.5328
9.85	1.4758	1.7216	1.4864		1.6549	1.4701	1.5767		1.6606	1.8112	1.6475		9.85	1.5629	1.5108	1.5759		1.5645	1.6614	1.5653		1.6093	1.6451	1.6223		1.6337	1.6109	1.5523
9.86	1.4872	1.7298	1.4742		1.654	1.4701	1.567		1.654	1.8055	1.6549		9.86	1.5775	1.5149	1.5726		1.5653	1.6646	1.558		1.6125	1.6606	1.6182		1.6247	1.6247	1.5686
9.87	1.4774	1.733	1.4717		1.6557	1.4644	1.5751		1.6622	1.7957	1.6695		9.87	1.5865	1.5043	1.5726		1.5702	1.6744	1.5653		1.615	1.6573	1.6109		1.6068	1.6345	1.58
9.88	1.4685	1.7354	1.4717		1.6728	1.475	1.584		1.6597	1.7916	1.6638		9.88	1.5954	1.5018	1.5865		1.5751	1.676	1.5613		1.615	1.6459	1.6133		1.606	1.6256	1.5816
9.89	1.4538	1.7403	1.4693		1.6947	1.4717	1.5954		1.672	1.8014	1.654		9.89	1.5938	1.5018	1.5897		1.5743	1.6777	1.5678		1.6044	1.6402	1.6256		1.6142	1.6166	1.5637
9.9	1.4611	1.7306	1.4685		1.6907	1.4668	1.5954		1.654	1.8103	1.6492		9.9	1.5946	1.5116	1.5889		1.5718	1.6654	1.5751		1.6085	1.6451	1.6443		1.6239	1.6044	1.5547
9.91	1.4554	1.7265	1.4782		1.6777	1.4579	1.5808		1.6557	1.8258	1.65		9.91	1.5889	1.5108	1.5824		1.5743	1.663	1.593		1.6093	1.6549	1.6435		1.6386	1.6068	1.5539
9.92	1.4587	1.7257	1.4766		1.6622	1.4522	1.584		1.6549	1.8063	1.6492		9.92	1.5963	1.5124	1.5873		1.5792	1.6606	1.5963		1.619	1.6581	1.6345		1.65	1.6077	1.5572
9.93	1.4676	1.746	1.4807		1.6524	1.4636	1.5832		1.6638	1.7989	1.65		9.93	1.6101	1.501	1.5889		1.5645	1.663	1.6036		1.6174	1.6589	1.6247		1.6443	1.6207	1.5596
9.94	1.4717	1.7485	1.4774		1.6581	1.4595	1.5922		1.6703	1.7778	1.6614		9.94	1.6052	1.5132	1.5954		1.5604	1.654	1.5971		1.619	1.6679	1.6321		1.6239	1.6223	1.5686
9.95	1.4839	1.7395	1.4937		1.6646	1.4676	1.6003		1.6744	1.781	1.6654		9.95	1.5873	1.5092	1.5808		1.5442	1.65	1.5954		1.6264	1.6663	1.6288		1.6125	1.6215	1.5783
9.96	1.479	1.7265	1.4872		1.6622	1.4668	1.6077		1.685	1.7786	1.6549		9.96	1.5775	1.5116	1.5808		1.5474	1.6459	1.5678		1.6329	1.6752	1.6296		1.6247	1.6223	1.5808
9.97	1.4774	1.7184	1.4945		1.6679	1.4709	1.6158		1.6915	1.7827	1.6597		9.97	1.5857	1.4978	1.5775		1.5547	1.6451	1.5629		1.6296	1.676	1.6093		1.6435	1.6182	1.58
9.98	1.4668	1.7257	1.479		1.6728	1.4619	1.5954		1.6899	1.7932	1.6663		9.98	1.5897	1.4921	1.5824		1.5686	1.6646	1.5637		1.628	1.6842	1.6182		1.6427	1.6166	1.5824
9.99	1.4685	1.7379	1.4839		1.6891	1.4571	1.5849		1.6842	1.803	1.6825		9.99	1.584	1.5002	1.5914		1.5832	1.6825	1.5865		1.6256	1.6711	1.6296		1.6459	1.6109	1.584
[truncated: 29,999 more rows]

## Sheet: Sucrose and starch content
	Sucrose content(mg/g)			OD (625nm)	Starch content(mg/g)
0(1）	5.71895		0(1）	0.05	84.2246
0(2）	6.18092		0(2）	0.049	81.1518
0(3）	5.95238		0(3）	0.053	87.3016
24（1）	8.60585		24（1）	0.091	134.251
24（2）	9.14634		24（2）	0.096	153.377
24（3）	8.30341		24（3）	0.084	130.61
	Sucrose content(mg/g)			OD (625nm)	Starch content(mg/g)
Intacta+Water(1)	6.82143		Intacta+Water(1)	0.103	57.6429
Intacta+Water(2)	6.89744		Intacta+Water(2)	0.094	56.8846
Intacta+Water(3)	6.58333		Intacta+Water(3)	0.096	53.8929
Intact+H2O2(1)	10.1313		Intact+H2O2(1)	0.174	81.1818
Intact+H2O2(2)	10.3385		Intact+H2O2(2)	0.171	81.0462
Intact+H2O2(3)	9.63184		Intact+H2O2(3)	0.167	76.8358
Ttimming+Water(1)	8.28415		Ttimming+Water(1)	0.122	62.2623
Ttimming+Water(2)	7.34409		Ttimming+Water(2)	0.131	65.6129
Ttimming+Water(3)	8.1954		Ttimming+Water(3)	0.126	67.5517
Trimming+H2O2(1)	12.9479		Trimming+H2O2(1)	0.186	89.3438
Trimming+H2O2(2)	12.1333		Trimming+H2O2(2)	0.19	89.8154
Trimming+H2O2(3)	11.7744		Trimming+H2O2(3)	0.192	90.7385

## Sheet: H2O2 content
Time(h)	Clipping leaf	Unlipping leaf	Clipping leaf	Unlipping leaf
	OD (405nm)		content(mmol/g)
0(1)	0.193	0.141	0.62069	0.441379
0(2)	0.148	0.183	0.465517	0.420059
0(3)	0.118	0.133	0.362069	0.413793
1(1)	0.232	0.186	0.755172	0.596552
1(2)	0.251	0.18	0.82069	0.575862
1(3)	0.282	0.197	0.927586	0.572562
3(1)	0.293	0.184	0.965517	0.589655
3(2)	0.256	0.195	0.837931	0.627586
3(3)	0.294	0.218	0.968966	0.706897
6(1)	0.241	0.159	0.786207	0.503448
6(2)	0.289	0.163	0.951724	0.517241
6(3)	0.229	0.169	0.737931	0.537931
12(1)	0.227	0.191	0.737931	0.613793
12(2)	0.247	0.192	0.806897	0.617241
12(3)	0.276	0.189	0.906897	0.606897
24(1）	0.272	0.184	0.893103	0.589655
24(2）	0.261	0.197	0.855172	0.634483
24(3）	0.282	0.19	0.927586	0.610345
48(1)	0.192	0.112	0.617241	0.341379
48(2)	0.189	0.133	0.606897	0.413793
48(3)	0.201	0.149	0.648276	0.468966
72(1)	0.14	0.101	0.437931	0.303448
72(2)	0.162	0.093	0.513793	0.275862
72(3)	0.149	0.087	0.468966	0.255172

## Sheet: SOD、POD、CAT
	SOD
	24h		48h		72h
	OD（560nm）	Activity	OD（560nm）	Activity	OD（560nm）	Activity
Intacta+Water(1)	0.667	0.0292888	0.649	0.030914	0.632	0.0338333
Intacta+Water(2)	0.672	0.0290173	0.652	0.0309581	0.637	0.0336296
Intacta+Water(3)	0.675	0.0281289	0.654	0.0301814	0.628	0.0344167
Intact+H2O2(1)	0.354	0.0764499	0.459	0.0603913	0.499	0.0532221
Intact+H2O2(2)	0.342	0.0761087	0.47	0.0592301	0.505	0.0527779
Intact+H2O2(3)	0.338	0.0785196	0.463	0.0593349	0.509	0.0524051
Ttimming+Water(1)	0.434	0.0634047	0.312	0.0822	0.484	0.0546512
Ttimming+Water(2)	0.442	0.0627	0.321	0.0786564	0.491	0.0540628
Ttimming+Water(3)	0.437	0.0624663	0.319	0.0808355	0.487	0.0548657
Trimming+H2O2(1)	0.392	0.0699259	0.288	0.086	0.455	0.0591725
Trimming+H2O2(2)	0.398	0.0695764	0.293	0.0829404	0.447	0.0608125
Trimming+H2O2(3)	0.401	0.0680567	0.292	0.0850718	0.461	0.0590041
	24h				48h				72h
	OD（460nm)			Activity	OD（460nm)			Activity	OD（460nm)			Activity
Intacta+Water(1)	0.463	0.502	0.4825	1.91468	0.472	0.507	0.4895	1.94246	0.483	0.535	0.509	2.01984
Intacta+Water(2)	0.477	0.495	0.486	1.89844	0.486	0.515	0.5005	1.95508	0.488	0.527	0.5075	1.98242
Intacta+Water(3)	0.447	0.499	0.473	1.87698	0.483	0.521	0.502	1.99206	0.483	0.53	0.5065	2.00992
Intact+H2O2(1)	0.835	0.811	0.823	3.18992	0.696	0.717	0.7065	2.75977	0.602	0.635	0.6185	2.474
Intact+H2O2(2)	0.857	0.824	0.8405	3.34861	0.68	0.702	0.691	2.67829	0.593	0.622	0.6075	2.41071
Intact+H2O2(3)	0.876	0.838	0.857	3.33463	0.688	0.708	0.698	2.74803	0.61	0.647	0.6285	2.48419
Ttimming+Water(1)	0.676	0.741	0.7085	2.74612	0.76	0.806	0.783	3.05859	0.713	0.776	0.7445	2.978
Ttimming+Water(2)	0.684	0.744	0.714	2.84462	0.762	0.812	0.787	3.05039	0.707	0.735	0.721	2.86111
Ttimming+Water(3)	0.696	0.737	0.7165	2.78794	0.765	0.806	0.7855	3.09252	0.699	0.717	0.708	2.79842
Trimming+H2O2(1)	0.723	0.788	0.7555	2.92829	0.859	0.901	0.88	3.4375	0.758	0.803	0.7805	3.122
Trimming+H2O2(2)	0.717	0.791	0.754	3.00398	0.861	0.896	0.8785	3.40504	0.762	0.81	0.786	3.11905
Trimming+H2O2(3)	0.709	0.795	0.752	2.92607	0.855	0.905	0.88	3.46457	0.767	0.809	0.788	3.11462
	24h				48h				72h
	OD（240nm)			Activity	OD（240nm)			Activity	OD（240nm)			Activity
Intacta+Water(1)	0.433	0.387	0.41	162.698	0.442	0.413	0.4275	169.643	0.467	0.402	0.4345	172.421
Intacta+Water(2)	0.425	0.392	0.4085	159.57	0.431	0.41	0.4205	164.258	0.455	0.398	0.4265	166.602
Intacta+Water(3)	0.421	0.378	0.3995	158.532	0.42	0.407	0.4135	164.087	0.448	0.39	0.419	166.27
Intact+H2O2(1)	0.958	0.732	0.845	327.519	0.874	0.823	0.8485	331.445	0.764	0.697	0.7305	292.2
Intact+H2O2(2)	0.962	0.742	0.852	339.442	0.871	0.813	0.842	326.357	0.771	0.685	0.728	288.889
Intact+H2O2(3)	0.966	0.734	0.85	330.739	0.868	0.812	0.84	330.709	0.786	0.705	0.7455	294.664
Ttimming+Water(1)	0.723	0.664	0.6935	268.798	0.961	0.876	0.9185	358.789	0.782	0.813	0.7975	319
Ttimming+Water(2)	0.714	0.678	0.696	277.291	0.956	0.885	0.9205	356.783	0.776	0.789	0.7825	310.516
Ttimming+Water(3)	0.699	0.67	0.6845	266.342	0.969	0.891	0.93	366.142	0.795	0.794	0.7945	314.032
Trimming+H2O2(1)	0.739	0.672	0.7055	273.45	1.035	0.954	0.9945	388.477	0.963	0.876	0.9195	367.8
Trimming+H2O2(2)	0.741	0.665	0.703	280.08	1.101	0.962	1.0315	399.806	0.956	0.854	0.905	359.127
Trimming+H2O2(3)	0.753	0.661	0.707	275.097	1.054	0.966	1.01	397.638	0.977	0.861	0.919	363.241
